# Supplementary material for: A Mutation in Histone H2B Represents a New Class of Oncogenic Driver
Source: Oxford University Press journal article supplement (doi:10.1158/2159-8290.cd-19-0393), 2019-07-23
Supplement: 21598290cd190393-sup-219971_2_supp_5628447_pr53k9.xlsx [file 21598290cd190393-sup-219971_2_supp_5628447_pr53k9.xlsx]

## Sheet: H2B Summary
H2B paralog missense mutation summary					2019-05-28															Average # mutations:		9.784		total patients with an H2B mutations
	Canonical histones at HIST1 cluster															HIST2 cluster		HIST3 cluster		Std deviation:		7.70901		1223
cBioportal AA position	H2BA***	H2BB	H2BC	H2BD	H2BE	H2BF	H2BG	H2BH	H2BI	H2BJ	H2BK	H2BL	H2BM	H2BN	H2BO	HIST2H2BE	HIST2H2BF	HIST3H2BB		total patients with mutation	AA Positions	Z score
1																				0	0
2			1	2				1	2	1	1	1				1	1			11	1	0.155844
3	1		3	4		4	1	3			3		3			1	2	1		26	2	2.1039
4			3	2		2	2			2		1			1	4		1		18	3	1.06494
5		2	1						1			2				4		2		12	4	0.285714
6			1													1				2	5	-1.01299
7			3	1					1	1		2			1	1	1	1		12	6	0.285714
8			1	1	1		1									2		1		7	7	-0.363636
9		1		2	1		4	1			1		2			4	2			18	8	1.06494
10		1	1	3		1	1	2	1					1		2		1		14	9	0.545455
11	1		1		4	2	2	2									1	3		16	10	0.805195
12				1					1					1						3	11	-0.883117
13					1					3	1			1	1	1				8	12	-0.233766
14		1	1	2		1			1		2	1		1	1			1		12	13	0.285714
15		2			1	1		2		2	2	1			1	2	1			15	14	0.675325
16			2						2	1	1	1								7	15	-0.363636
17							1	1									1			3	16	-0.883117
18			3	1						1										5	17	-0.623377
19	1		1	1	1				1		1				2					8	18	-0.233766
20	2			3	1		1				1		1					1		10	19	0.025974
21		1									1									2	20	-1.01299
22			1	1		1				1		1			2					7	21	-0.363636
23				1			1	4	1		1									8	22	-0.233766
24		1					1				1			1		1				5	23	-0.623377
25		1	1						1						1					4	24	-0.753247
26		1				1		2	1			1	1		1					8	25	-0.233766
27	1		3	2				1	1	1	3	1	1			2				16	26	0.805195
28		1	1				1	1	2		1	1		1			2			11	27	0.155844
29														1						1	28	-1.14286
30	2			2				2	1	1	1		3					1		13	29	0.415584
31	1		1	1			1													4	30	-0.753247
32			2	2	1						1	1								7	31	-0.363636
33		1	2							2				1						6	32	-0.493506
34	4	1					4	1				1	5			2				18	33	1.06494
35	1		1	1		1											1			5	34	-0.623377
36	1	2	1	1	1		2	1	2	1	2		1		2		2			19	35	1.19481
37		2	1	4						1	2		1	1	1	4	2			19	36	1.19481
38		1	1							1	1						1			5	37	-0.623377
39	2		1	1				1		2			1		1	2	1			12	38	0.285714
40	1			1							3		1		1	2		1		10	39	0.025974
41			1			1	1	1			1				1	1				7	40	-0.363636
42				1		1		1								1		1		5	41	-0.623377
43					1	2		1		1		2	1				1			9	42	-0.103896
44				1			1	1			2					1	2	1		9	43	-0.103896
45			1	1		1	1					2				1				7	44	-0.363636
46										1			1					1		3	45	-0.883117
47			2					1		1								1		5	46	-0.623377
48			2	4		2				1			1							10	47	0.025974
49		1		1	1		1							2			1			7	48	-0.363636
50		1		1			1			1			2	1			1			8	49	-0.233766
51	3	1	1	1			2		1	1				1						11	50	0.155844
52	1			6	1		2		1					1	1		1			14	51	0.545455
53								1									1			2	52	-1.01299
54	1	1	2		1	2		1		3	1	2	2	1	5	9	4	3		38	53	3.66234
55			1	1			1		1				1	1			1			7	54	-0.363636
56	1	1		1			1		1	1	1	1	2	3						13	55	0.415584
57	4	1	2		1				2	1	1					1		1		14	56	0.545455
58						1			1							1				3	57	-0.883117
59									1				1		2		1	1		6	58	-0.493506
60		1	1	1	1	1		1		2	1		1					1		11	59	0.155844
61			4				2					1		2	2					11	60	0.155844
62			1	3								1	1							6	61	-0.493506
63	1	1			1		2			1	1			4	2	2	1			16	62	0.805195
64		1	2		2								2			1				8	63	-0.233766
65	2		7		1			1	1	1	1		1		2	2	1			20	64	1.32468
66			1				2								2					5	65	-0.623377
67			1					1			1		1							4	66	-0.753247
68									2		1				1					4	67	-0.753247
69	1	1		5		1		5	2		1	1		2	2	1				22	68	1.58442
70	1		1	1			1						1		1		1			7	69	-0.363636
71			2	2						1	5			2		11	2	1		26	70	2.1039
72		2	7	1	1		4	5							1	1		1		23	71	1.71429
73	1	2	4		5	1		1	1		1		1			1		2		20	72	1.32468
74			1	2						1	3	2	1	1		1	1			13	73	0.415584
75	2	2					2						1							7	74	-0.363636
76							1	1		1		1						1		5	75	-0.623377
77		2	10	8	2	8	3	7	9		1	4			3	1		2		60	76	6.51948
78			1		2	2						1			1					7	77	-0.363636
79			3	1	1		1								1					7	78	-0.363636
80	1								4		1		3					1		10	79	0.025974
81																1	1			2	80	-1.01299
82	1		2			1		1	1		2		2				2			12	81	0.285714
83											1						1			2	82	-1.01299
84			1	1			1					3					1			7	83	-0.363636
85	1		5			1					2					1	1			11	84	0.155844
86			1	1			2	1										2		7	85	-0.363636
87	5	1	2						2		2	1	2					1		16	86	0.805195
88				1	1	1	1		1	2			2		1	1		1		12	87	0.285714
89			2	4			2		1	1				1				1		12	88	0.285714
90			1						1		1	1								4	89	-0.753247
91		1			1					1		2			2		1			8	90	-0.233766
92	2			1		1	1						1		2		1			9	91	-0.103896
93	2		3					1		1	1	1	1			2	2	1		15	92	0.675325
94		1	3	1		2		2	2			1	1			1	1			15	93	0.675325
95			1	1								1				2		1		6	94	-0.493506
96				1					1									1		3	95	-0.883117
97		2								1	1					1		1		6	96	-0.493506
98		1	1			2														4	97	-0.753247
99				4	2			1	3			1		1						12	98	0.285714
100	2	1		1	1	1	1			1		2	2					1		13	99	0.415584
101																				0	100	-1.27273
102						1										1				2	101	-1.01299
103			3		1			1		1										6	102	-0.493506
104	1	1	2			1	2	1		2	1	2				2				15	103	0.675325
105	1	1		2	1	1	1				1	1		1						10	104	0.025974
106			2	2		1		1				1	1	2	1					11	105	0.155844
107																2				2	106	-1.01299
108	1			3			1			1	1		1	1						9	107	-0.103896
109			1			1														2	108	-1.01299
110			1				1				2				1					5	109	-0.623377
111		1	1		1			1	1				1	1			1	1		9	110	-0.103896
112	1										2									3	111	-0.883117
113					1	1												1		3	112	-0.883117
114		3	2				5	5	1	5	3		1	1	1	3				30	113	2.62338
115				1	1				1					1	2	1	1			8	114	-0.233766
116	2			1	1			1									1			6	115	-0.493506
117					1		1											1		3	116	-0.883117
118								1				1			1	1				4	117	-0.753247
119				3	2	1							2			1	2	1		12	118	0.285714
120	1		2								2									5	119	-0.623377
121		1	2							1						2				6	120	-0.493506
122		1	1	2	1															5	121	-0.623377
123			2	2		2			2		1	1				1	1			12	122	0.285714
124			1	2		2		1				1	1			1	1			10	123	0.025974
125			2					1		1					2			1		7	124	-0.363636
126			1	1							1			1		1				5	125	-0.623377
	*** Has an extra V at position 4 - removed for alignment
somatic mutation freq (%):	0.1	0.1	0.3	0.3	0.1	0.2	0.2	0.2	0.2	0.1	0.2	0.1	0.1	0.1	0.1	0.2	0.1	0.1

## Sheet: H2B-dbSNP report
dbSNP search for H2B SNPs that occur at E2, G53, E76, E113				Date of Search: 5/8/2019 and 6/1/19		We searched the single nucleotide polymorphism database ( dbSNP, NCBI) to determine the frequency of variations at amino acids of hsitone genes that were frequently found mutated in cancer patients.
https://www.ncbi.nlm.nih.gov/variation/view/?q=HIST1H2B
search for HIST1H2BA/B/C/D/E/F/G/H/I/J/K/L/M/N/O, HIST2H2BE/F, HIST3H2BB							Mutant	Variant ID	location (GRCh38.p12)	Paralog	Base change	AA change	Link to dbSNP reference report	frequency (TOPMED)	Frequency (GnomAD)	Frequency (ExAC)
							D2Y	rs766663233	chr6:27893469	H2BO	NM_003527.4:c.7G>T D [GAC] > Y [TAC]	NP_003518.2:p.Asp3Tyr	https://www.ncbi.nlm.nih.gov/snp/rs766663233		4.21873e-06	8.73897e-06
* = any missense mutation							D2Y	rs1438443056	chr1:228458136	HIST3H2BB	NM_175055.2:c.7G>T D [GAC] > Y [TAC]	NP_778225.1:p.Asp3Tyr	https://www.ncbi.nlm.nih.gov/snp/rs1438443056		4.22066e-06
AA Position	Cumulative frequency in dbSNP databases			Average Frequency	Frequency in cancer		E113D	rs201428303	chr6:26043316	H2BB	NM_021062.2:c.342G>C E [GAG] > D [GAC]	NP_066406.1:p.Glu114Asp	https://www.ncbi.nlm.nih.gov/snp/rs201428303	3.18552e-05	2.03968e-05	3.41087e-05
E/D2*	7.96381e-05	0.000130148	6.66278e-05	9.21379e-05			E2A	rs751560107	chr6:26272983	H2BI	NM_003525.2:c.8A>C E [GAA] > A [GCA]	NP_003516.1:p.Glu3Ala	https://www.ncbi.nlm.nih.gov/snp/rs751560107	7.96381e-06	4.06055e-06	8.23696e-06
D2Y	8.43939e-06	8.73897e-06		8.58918e-06	2.3959e-05		E2A	rs1452691689	chr6:27815051	H2BM	NM_003521.2:c.8A>C E [GAA] > A [GCA]	NP_003512.1:p.Glu3Ala	https://www.ncbi.nlm.nih.gov/snp/rs1452691689		3.22977e-05
E2A	4.04246e-05	1.65006e-05		2.84626e-05			E2A	rs747172498	chr6:26158177	H2BD	NM_021063.3:c.8A>C E [GAA] > A [GCA]	NP_066407.1:p.Glu3Ala	https://www.ncbi.nlm.nih.gov/snp/rs747172498		4.06636e-06	8.26364e-06
E2D	3.27336e-05	2.4857e-05		2.87953e-05	2.3959e-05		E2D	rs372673859	chr6:26216635	H2BG	NM_003518.3:c.9A>C E [GAA] > D [GAC]	NP_003509.1:p.Glu3Asp	https://www.ncbi.nlm.nih.gov/snp/rs372673859	4.77829e-05	2.86695e-05	1.66113e-05
E2G	3.22997e-05			3.22997e-05			E2D	rs970819001	chr6:26272984	H2BI	NM_003525.2:c.9A>T E [GAA] > D [GAT]	NP_003516.1:p.Glu3Asp	https://www.ncbi.nlm.nih.gov/snp/rs970819001
E2K	1.59276e-05	4.06161e-06		9.99462e-06	0.00023959		E2D	rs779327004	chr6:27838670	H2BN	NM_003520.3:c.9G>T E [GAG] > D [GAT]	NP_003511.1:p.Glu3Asp	https://www.ncbi.nlm.nih.gov/snp/rs779327004		4.06408e-06	8.24565e-06
E2Q	7.96381e-06	1.2189e-05	1.65313e-05	1.2228e-05	0.000167713		E2D	rs139304638	chr1:149886632	HIST2H2BE	NM_003528.2:c.9A>T E [GAA] > D [GAT]	NP_003519.1:p.Glu3Asp	https://www.ncbi.nlm.nih.gov/snp/rs139304638
E2V					4.7918e-05		E2G	rs1363602770	chr6:27838669	H2BN	NM_003520.3:c.8A>G E [GAG] > G [GGG]	NP_003511.1:p.Glu3Gly	https://www.ncbi.nlm.nih.gov/snp/rs1363602770		3.22997e-05
G53*	3.18552e-05	9.70425e-05	0.000833305	0.000320734			E2K	rs952848945	chr6:27807900	H2BL	NM_003519.3:c.7G>A E [GAG] > K [AAG]	NP_003510.1:p.Glu3Lys	https://www.ncbi.nlm.nih.gov/snp/rs952848945	1.59276e-05	4.06161e-06
G53A		3.22789e-05		3.22789e-05	2.3959e-05		E2Q	rs1317720040	chr6:26199565	H2BF	NM_003522.3:c.7G>C E [GAA] > Q [CAA]	NP_003513.1:p.Glu3Gln	https://www.ncbi.nlm.nih.gov/snp/rs1317720040	7.96381e-06
G53C					7.18769e-05		E2Q	rs776038374	chr6:26272982	H2BI	NM_003525.2:c.7G>C E [GAA] > Q [CAA]	NP_003516.1:p.Glu3Gln	https://www.ncbi.nlm.nih.gov/snp/rs776038374		8.12117e-06	8.23696e-06
G53D		4.04001e-05		4.04001e-05	0.000742728		E2Q	rs751572161	chr6:27146792	H2BK	NM_080593.2:c.7G>C E [GAA] > Q [CAA]	NP_542160.1:p.Glu3Gln	https://www.ncbi.nlm.nih.gov/snp/rs751572161		4.06782e-06	8.29435e-06
G53R					2.3959e-05		E76A	rs1355388019	chr6:26123675	H2BC	NM_003526.2:c.230A>C E [GAG] > A [GCG]	NP_003517.2:p.Glu77Ala	https://www.ncbi.nlm.nih.gov/snp/rs1355388019		4.06055e-06
G53S	2.38914e-05	4.06062e-06	0.000816832	0.000281595	4.7918e-05		E76D	rs1309104223	Chr6:26123674	H2BC	NM_003526.2:c.231G>C E [GAG] > D [GAC]	NP_003517.2:p.Glu77Asp	https://www.ncbi.nlm.nih.gov/snp/rs1309104223		4.06055e-06
G53V	7.96381e-06	2.03029e-05	1.64728e-05	1.49132e-05			E76D	rs776673491	chr6:27838892	H2BN	NM_003520.3:c.231G>C E [GAG] > D [GAC]	NP_003511.1:p.Glu77Asp	https://www.ncbi.nlm.nih.gov/snp/rs776673491		4.06108e-06	8.2526e-06
F/I70*	0.000159276	0.000223411	0.000214176	0.000198955			E76D	rs145888457	chr6:27893693	H2BO	NM_003527.4:c.231G>C E [GAG] > D [GAC]	NP_003518.2:p.Glu77Asp	https://www.ncbi.nlm.nih.gov/snp/rs145888457
I70T	0.000143349	0.000194986	0.000189466	0.000175933			E76K	rs879122516	chr6:26123676	H2BC	NM_003526.2:c.229G>A E [GAG] > K [AAG]	NP_003517.2:p.Glu77Lys	https://www.ncbi.nlm.nih.gov/snp/rs879122516
I70V		4.0622e-06	8.2375e-06	6.14985e-06			E76K	rs772836222	chr6:26158398	H2BD	NM_021063.3:c.229G>A E [GAG] > K [AAG]	NP_066407.1:p.Glu77Lys	https://www.ncbi.nlm.nih.gov/snp/rs772836222		4.06065e-06	8.23764e-06
F70C					2.3959e-05		E76K	rs933046951	chr6:27132522	H2BJ	NM_021058.3:c.229G>A E [GAG] > K [AAG]	NP_066402.2:p.Glu77Lys	https://www.ncbi.nlm.nih.gov/snp/rs933046951
F70I					2.3959e-05		F70S	rs763238923	chr6:27132539	H2BJ	NM_021058.3:c.212T>C F [TTC] > S [TCC]	NP_066402.2:p.Phe71Ser	https://www.ncbi.nlm.nih.gov/snp/rs763238923		4.06055e-06	8.23642e-06
F70L					0.000527098		F70S	rs1172946353	chr6:27815255	H2BM	NM_003521.2:c.212T>C F [TTT] > S [TCT]	NP_003512.1:p.Phe71Ser	https://www.ncbi.nlm.nih.gov/snp/rs1172946353		4.06058e-06
F70S		8.12113e-06	8.23642e-06	8.17878e-06	4.7918e-05		G53A	rs868864447	chr6:26216483	H2BG	NM_003518.3:c.161G>C G [GGC] > A [GCC]	NP_003509.1:p.Gly54Ala	https://www.ncbi.nlm.nih.gov/snp/rs868864447		3.22789e-05
E76*		1.62428e-05	1.64902e-05	1.63665e-05			G53D	rs868864447	chr6:26216483	H2BG	NM_003518.3:c.161G>A G [GGC] > D [GAC]	NP_003509.1:p.Gly54Asp	https://www.ncbi.nlm.nih.gov/snp/rs868864447		3.22789e-05
E76A		4.06055e-06		4.06055e-06			G53D	rs1438417001	chr6:27815204	H2BM	NM_003521.2:c.161G>A G [GGC] > D [GAC]	NP_003512.1:p.Gly54Asp	https://www.ncbi.nlm.nih.gov/snp/rs1438417001		4.06058e-06
E76D		8.12163e-06	8.2526e-06	8.18711e-06	4.7918e-05		G53D	rs1194104222	chr6:27893623	H2BO	NM_003527.4:c.161G>A G [GGC] > D [GAC]	NP_003518.2:p.Gly54Asp	https://www.ncbi.nlm.nih.gov/snp/rs1194104222		4.06058e-06
E76G					2.3959e-05		G53S	rs774770463	chr6:26043498	H2BB	NM_021062.2:c.160G>A G [GGC] > S [AGC]	NP_066406.1:p.Gly54Ser	https://www.ncbi.nlm.nih.gov/snp/rs774770463
E76K		4.06065e-06	8.23764e-06	6.14914e-06	0.0010542		G53S	rs13264284421	chr6:26123745	H2BC	NM_003526.2:c.160G>A G [GGC] > S [AGC]	NP_003517.2:p.Gly54Ser	https://www.ncbi.nlm.nih.gov/snp/rs1326428421	7.96381e-06
E76Q					0.000311467		G53S	rs966777976	chr6:26183955	H2BE	NM_003523.2:c.160G>A G [GGC] > S [AGC]	NP_003514.2:p.Gly54Ser	https://www.ncbi.nlm.nih.gov/snp/rs966777976	7.96381e-06
E113D	3.18552e-05	2.03968e-05	3.41087e-05	2.87869e-05	2.3959e-05		G53S	rs776190679	chr6:27146639	H2BK	NM_080593.2:c.160G>A G [GGC] > S [AGC]	NP_542160.1:p.Gly54Ser	https://www.ncbi.nlm.nih.gov/snp/rs776190679			0.000816832
E113K					0.000407303		G53S	rs1469525403	chr6:27893622	H2BO	NM_003527.4:c.160G>A G [GGC] > S [AGC]	NP_003518.2:p.Gly54Ser	https://www.ncbi.nlm.nih.gov/snp/rs1469525403	7.96381e-06	4.06062e-06
E113Q					0.000263549		G53V	rs752096117	chr6:26273136	H2BI	NM_003525.2:c.161G>T G [GGC] > V [GTC]	NP_003516.1:p.Gly54Val	https://www.ncbi.nlm.nih.gov/snp/rs752096117	7.96381e-06	2.03029e-05	1.64728e-05
E113V					2.3959e-05		I70T	rs761537792	chr6:25727120	H2BA	NM_170610.2:c.212T>C I [ATC] > T [ACC]	NP_733759.1:p.Ile71Thr	https://www.ncbi.nlm.nih.gov/snp/rs761537792	0.000143349	0.000194986	0.000189466
							I70V	rs774096146	chr6:25727119	H2BA	NM_170610.2:c.211A>G I [ATC] > V [GTC]	NP_733759.1:p.Ile71Val	https://www.ncbi.nlm.nih.gov/snp/rs774096146		4.0622e-06	8.2375e-06

## Sheet: HIST1H2BA
Study	Sample ID	Cancer Type	Protein Change	Annotation	Functional Impact	Mutation Type	Copy #	COSMIC	MS	VS	Center	Chromosome	Start Pos	End Pos	Ref	Var	Allele Freq (T)	Allele Freq (N)	Variant Reads	Ref Reads	Variant Reads (N)	Ref Reads (N)	# Mut in Sample
Pan-Lung Cancer (TCGA, Nat Genet 2016)	TCGA-43-3920-01	Lung Squamous Cell Carcinoma	V4M	OncoKB: NA;CIViC: NA;MyCancerGenome: not present;CancerHotspot: no;3DHotspot: no	MutationAssessor: impact: neutral, score: 0;SIFT: impact: tolerated_low_confidence, score: 0.09;Polyphen-2: impact: benign, score: 0.015	Missense_Mutation			Somatic	NA	broad.mit.edu	6	25727146	25727146	G	A			25	36		89	244
Skin Cutaneous Melanoma (TCGA, Provisional)	TCGA-FS-A1YY-06	Cutaneous Melanoma	S12F	OncoKB: NA;CIViC: NA;MyCancerGenome: not present;CancerHotspot: no;3DHotspot: no	MutationAssessor: impact: low, score: 1.245;SIFT: impact: deleterious_low_confidence, score: 0;Polyphen-2: impact: probably_damaging, score: 0.991	Missense_Mutation			Somatic	NA	broad.mit.edu	6	25727171	25727171	C	T			22	54			169
Colorectal Adenocarcinoma (DFCI, Cell Reports 2016)	coadread_dfci_2016_352983	Colorectal Adenocarcinoma	G28D	OncoKB: NA;CIViC: NA;MyCancerGenome: not present;CancerHotspot: no;3DHotspot: no	MutationAssessor: impact: low, score: 1.81;SIFT: impact: tolerated_low_confidence, score: 0.12;Polyphen-2: impact: benign, score: 0.001	Missense_Mutation			NA	NA	dfci.harvard.edu	6	25727219	25727219	G	A							947
Head and Neck Squamous Cell Carcinoma (TCGA, Provisional)	TCGA-IQ-A61H-01	Head and Neck Squamous Cell Carcinoma	R31C	OncoKB: NA;CIViC: NA;MyCancerGenome: not present;CancerHotspot: no;3DHotspot: no	MutationAssessor: impact: medium, score: 2.015;SIFT: impact: tolerated_low_confidence, score: 0.09;Polyphen-2: impact: benign, score: 0.41	Missense_Mutation			Somatic	NA	broad.mit.edu	6	25727227	25727227	C	T			19	91			135
Bladder Cancer (TCGA, Cell 2017)	TCGA-UY-A8OB-01	Bladder Urothelial Carcinoma	K32E	OncoKB: NA;CIViC: NA;MyCancerGenome: not present;CancerHotspot: no;3DHotspot: no	MutationAssessor: impact: medium, score: 2.265;SIFT: impact: deleterious_low_confidence, score: 0.02;Polyphen-2: impact: benign, score: 0.026	Missense_Mutation			Somatic	NaN	broad.mit.edu	6	25727230	25727230	A	G				49			313
Uterine Corpus Endometrial Carcinoma (TCGA, Provisional)	TCGA-D1-A167-01	Uterine Endometrioid Carcinoma	R35C	OncoKB: NA;CIViC: NA;MyCancerGenome: not present;CancerHotspot: no;3DHotspot: no	MutationAssessor: impact: medium, score: 3.23;SIFT: impact: tolerated_low_confidence, score: 0.09;Polyphen-2: impact: benign, score: 0.015	Missense_Mutation			Somatic	Untested	genome.wustl.edu	6	25727239	25727239	C	T			295	288	1	641	1361
Cutaneous Squamous Cell Carcinoma (MD Anderson, Clin Cancer Res 2014)	CSCC-42-T	Cutaneous Squamous Cell Carcinoma	R35C	OncoKB: NA;CIViC: NA;MyCancerGenome: not present;CancerHotspot: no;3DHotspot: no	MutationAssessor: impact: medium, score: 3.23;SIFT: impact: tolerated_low_confidence, score: 0.09;Polyphen-2: impact: benign, score: 0.015	Missense_Mutation			Somatic	Untested	hgsc.bcm.edu	6	25727239	25727239	C	T			18	100		74	362
Colorectal Adenocarcinoma (TCGA, Provisional)	TCGA-AA-3552-01	Colon Adenocarcinoma	R35H	OncoKB: NA;CIViC: NA;MyCancerGenome: not present;CancerHotspot: no;3DHotspot: no	MutationAssessor: impact: medium, score: 3.23;SIFT: impact: tolerated_low_confidence, score: 0.08;Polyphen-2: impact: possibly_damaging, score: 0.722	Missense_Mutation			Somatic	Valid	hgsc.bcm.edu	6	25727240	25727240	G	A							44
Desmoplastic Melanoma (Broad Institute, Nat Genet 2015)	35M	Desmoplastic Melanoma	R35S	OncoKB: NA;CIViC: NA;MyCancerGenome: not present;CancerHotspot: no;3DHotspot: no	MutationAssessor: impact: medium, score: 2.63;SIFT: impact: deleterious_low_confidence, score: 0.03;Polyphen-2: impact: probably_damaging, score: 0.912	Missense_Mutation			NA	NA	www.broadinstitute.org	6	25727239	25727239	C	A							1787
Uterine Corpus Endometrial Carcinoma (TCGA, Provisional)	TCGA-BS-A0UF-01	Uterine Endometrioid Carcinoma	E37D	OncoKB: NA;CIViC: NA;MyCancerGenome: not present;CancerHotspot: no;3DHotspot: no	MutationAssessor: impact: medium, score: 2.54;SIFT: impact: deleterious_low_confidence, score: 0.02;Polyphen-2: impact: probably_damaging, score: 0.92	Missense_Mutation			Somatic	Untested	genome.wustl.edu	6	25727247	25727247	G	T			123	238		455	7404
Bladder Cancer (TCGA, Cell 2017)	TCGA-BT-A20P-01	Bladder Urothelial Carcinoma	S40C	OncoKB: NA;CIViC: NA;MyCancerGenome: not present;CancerHotspot: no;3DHotspot: no	MutationAssessor: impact: medium, score: 3.42;SIFT: impact: deleterious_low_confidence, score: 0.02;Polyphen-2: impact: benign, score: 0.063	Missense_Mutation			Somatic	NaN	broad.mit.edu	6	25727255	25727255	C	G				20			82
NCI-60 Cell Lines (NCI, Cancer Res. 2012)	SR	Leukemia	I41V	OncoKB: NA;CIViC: NA;MyCancerGenome: not present;CancerHotspot: no;3DHotspot: no	MutationAssessor: impact: low, score: 1.13;SIFT: impact: tolerated_low_confidence, score: 1;Polyphen-2: impact: benign, score: 0.003	Missense_Mutation			NA	NA	discover.nci.nih.gov	6	25727257	25727257	A	G							139
Colorectal Adenocarcinoma (TCGA, Provisional)	TCGA-AA-3812-01	Colon Adenocarcinoma	P52L	OncoKB: NA;CIViC: NA;MyCancerGenome: not present;CancerHotspot: no;3DHotspot: no	MutationAssessor: impact: medium, score: 3.335;SIFT: impact: tolerated_low_confidence, score: 0.07;Polyphen-2: impact: benign, score: 0.234	Missense_Mutation			Somatic	Valid	broad.mit.edu	6	25727291	25727291	C	T							81
Colorectal Adenocarcinoma (DFCI, Cell Reports 2016)	coadread_dfci_2016_4537	Colorectal Adenocarcinoma	P52L	OncoKB: NA;CIViC: NA;MyCancerGenome: not present;CancerHotspot: no;3DHotspot: no	MutationAssessor: impact: medium, score: 3.335;SIFT: impact: tolerated_low_confidence, score: 0.07;Polyphen-2: impact: benign, score: 0.234	Missense_Mutation			NA	NA	dfci.harvard.edu	6	25727291	25727291	C	T							77
Mutational profiles of metastatic breast cancer (France, 2016)	MBC_189	Invasive Breast Carcinoma	S57C	OncoKB: NA;CIViC: NA;MyCancerGenome: not present;CancerHotspot: no;3DHotspot: no	MutationAssessor: impact: high, score: 4.615;SIFT: impact: deleterious_low_confidence, score: 0;Polyphen-2: impact: probably_damaging, score: 0.997	Missense_Mutation			Somatic	NA	GR	6	25727306	25727306	C	G			108	65		121	928
Skin Cutaneous Melanoma (Yale, Nat Genet 2012)	YUDUTY	Cutaneous Melanoma	S58L	OncoKB: NA;CIViC: NA;MyCancerGenome: not present;CancerHotspot: no;3DHotspot: no	MutationAssessor: impact: high, score: 3.575;SIFT: impact: deleterious_low_confidence, score: 0;Polyphen-2: impact: probably_damaging, score: 0.949	Missense_Mutation			somatic	NA	yale.edu	6	25727309	25727309	C	T							662
Colorectal Adenocarcinoma (DFCI, Cell Reports 2016)	coadread_dfci_2016_116	Colorectal Adenocarcinoma	S58L	OncoKB: NA;CIViC: NA;MyCancerGenome: not present;CancerHotspot: no;3DHotspot: no	MutationAssessor: impact: high, score: 3.575;SIFT: impact: deleterious_low_confidence, score: 0;Polyphen-2: impact: probably_damaging, score: 0.949	Missense_Mutation			NA	NA	dfci.harvard.edu	6	25727309	25727309	C	T							3753
Skin Cutaneous Melanoma (TCGA, Provisional)	TCGA-FR-A726-01	Lentigo Maligna Melanoma	M64I	OncoKB: NA;CIViC: NA;MyCancerGenome: not present;CancerHotspot: no;3DHotspot: no	MutationAssessor: impact: medium, score: 3.41;SIFT: impact: deleterious_low_confidence, score: 0.03;Polyphen-2: impact: benign, score: 0.033	Missense_Mutation			Somatic	NA	broad.mit.edu	6	25727328	25727328	G	A			48	123			6476
Skin Cutaneous Melanoma (Broad, Cell 2012)	MEL-Ma-Mel-105	Cutaneous Melanoma	S66F	OncoKB: NA;CIViC: NA;MyCancerGenome: not present;CancerHotspot: no;3DHotspot: no	MutationAssessor: impact: high, score: 4.23;SIFT: impact: deleterious_low_confidence, score: 0.03;Polyphen-2: impact: probably_damaging, score: 0.983	Missense_Mutation			NA	NA	broad.mit.edu	6	25727333	25727333	C	T							556
Colorectal Adenocarcinoma (DFCI, Cell Reports 2016)	coadread_dfci_2016_593	Colorectal Adenocarcinoma	S66F	OncoKB: NA;CIViC: NA;MyCancerGenome: not present;CancerHotspot: no;3DHotspot: no	MutationAssessor: impact: high, score: 4.23;SIFT: impact: deleterious_low_confidence, score: 0.03;Polyphen-2: impact: probably_damaging, score: 0.983	Missense_Mutation			NA	NA	dfci.harvard.edu	6	25727333	25727333	C	T							3618
Pan-Lung Cancer (TCGA, Nat Genet 2016)	TCGA-44-7667-01	Lung Adenocarcinoma	D70N	OncoKB: NA;CIViC: NA;MyCancerGenome: not present;CancerHotspot: no;3DHotspot: no	MutationAssessor: impact: high, score: 3.815;SIFT: impact: deleterious_low_confidence, score: 0.04;Polyphen-2: impact: probably_damaging, score: 0.998	Missense_Mutation			Somatic	NA	broad.mit.edu	6	25727344	25727344	G	A			12	71		100	408
Pediatric Ewing Sarcoma (DFCI, Cancer Discov 2014)	CHEWS012	Ewing Sarcoma	I71T	OncoKB: NA;CIViC: NA;MyCancerGenome: not present;CancerHotspot: no;3DHotspot: no	MutationAssessor: impact: medium, score: 2.905;SIFT: impact: deleterious_low_confidence, score: 0.01;Polyphen-2: impact: benign, score: 0.001	Missense_Mutation			NA	NA	dfci.harvard.edu	6	25727348	25727348	T	C							93
Merged Cohort of LGG and GBM (TCGA, Cell 2016)	TCGA-28-2502-01	Diffuse Glioma	R74C	OncoKB: NA;CIViC: NA;MyCancerGenome: not present;CancerHotspot: no;3DHotspot: no	MutationAssessor: impact: medium, score: 3.31;SIFT: impact: tolerated_low_confidence, score: 0.12;Polyphen-2: impact: possibly_damaging, score: 0.646	Missense_Mutation			NA	NA	mdanderson.org/ucsc.edu/broad.mit.edu	6	25727356	25727356	C	T			47	110		155	37
TCGA data for Esophagus-Stomach Cancers (TCGA, Nature 2017)	TCGA-D7-A4YV-01	Stomach Adenocarcinoma	A76V	OncoKB: NA;CIViC: NA;MyCancerGenome: not present;CancerHotspot: no;3DHotspot: no	MutationAssessor: impact: medium, score: 2.81;SIFT: impact: deleterious_low_confidence, score: 0.01;Polyphen-2: impact: benign, score: 0.012	Missense_Mutation			Somatic	Untested	genome.wustl.edu	6	25727363	25727363	C	T			13	63		83	925
Pediatric Ewing Sarcoma (DFCI, Cancer Discov 2014)	CHEWS019	Ewing Sarcoma	A83D	OncoKB: NA;CIViC: NA;MyCancerGenome: not present;CancerHotspot: no;3DHotspot: no	MutationAssessor: impact: high, score: 4.38;SIFT: impact: deleterious_low_confidence, score: 0;Polyphen-2: impact: probably_damaging, score: 0.947	Missense_Mutation			NA	NA	dfci.harvard.edu	6	25727384	25727384	C	A							92
Skin Cutaneous Melanoma(Broad, Cancer Discov 2014)	Pat_66_Pre	Melanoma	S86N	OncoKB: NA;CIViC: NA;MyCancerGenome: not present;CancerHotspot: no;3DHotspot: no	MutationAssessor: impact: neutral, score: -2.125;SIFT: impact: tolerated_low_confidence, score: 1;Polyphen-2: impact: benign, score: 0.003	Missense_Mutation			NA	NA	broad.mit.edu	6	25727393	25727393	G	A			31	135			1302
Genomic Hallmarks of Prostate Adenocarcinoma (CPC-GENE, Nature 2017)	CPCG0392-F1	Prostate Adenocarcinoma	R88C	OncoKB: NA;CIViC: NA;MyCancerGenome: not present;CancerHotspot: no;3DHotspot: no	MutationAssessor: impact: medium, score: 2.74;SIFT: impact: tolerated_low_confidence, score: 0.08;Polyphen-2: impact: probably_damaging, score: 0.931	Missense_Mutation			Somatic	Unknown	CPCGene	6	25727398	25727398	C	T							12
Colorectal Adenocarcinoma (TCGA, Provisional)	TCGA-AG-A002-01	Rectal Adenocarcinoma	R88H	OncoKB: NA;CIViC: NA;MyCancerGenome: not present;CancerHotspot: no;3DHotspot: no	MutationAssessor: impact: medium, score: 2.595;SIFT: impact: tolerated_low_confidence, score: 0.15;Polyphen-2: impact: benign, score: 0.029	Missense_Mutation			Somatic	Valid	broad.mit.edu	6	25727399	25727399	G	A							9925
Pan-Lung Cancer (TCGA, Nat Genet 2016)	LUAD-F00162-Tumor	Lung Adenocarcinoma	R88L	OncoKB: NA;CIViC: NA;MyCancerGenome: not present;CancerHotspot: no;3DHotspot: no	MutationAssessor: impact: high, score: 3.98;SIFT: impact: deleterious_low_confidence, score: 0.01;Polyphen-2: impact: possibly_damaging, score: 0.527	Missense_Mutation			Somatic	NA	broad.mit.edu	6	25727399	25727399	G	T			42	52		56	580
Desmoplastic Melanoma (Broad Institute, Nat Genet 2015)	Au9	Desmoplastic Melanoma	S93F	OncoKB: NA;CIViC: NA;MyCancerGenome: not present;CancerHotspot: no;3DHotspot: no	MutationAssessor: impact: high, score: 4.455;SIFT: impact: deleterious_low_confidence, score: 0.01;Polyphen-2: impact: probably_damaging, score: 0.963	Missense_Mutation			NA	NA	www.broadinstitute.org	6	25727414	25727414	C	T							251
Skin Cutaneous Melanoma (TCGA, Provisional)	TCGA-EE-A29L-06	Cutaneous Melanoma	S93F	OncoKB: NA;CIViC: NA;MyCancerGenome: not present;CancerHotspot: no;3DHotspot: no	MutationAssessor: impact: high, score: 4.455;SIFT: impact: deleterious_low_confidence, score: 0.01;Polyphen-2: impact: probably_damaging, score: 0.963	Missense_Mutation			Somatic	NA	broad.mit.edu	6	25727414	25727414	C	T			20	70			1633
Whole-exome sequences (WES) of pretreatment melanoma tumors (UCLA, Cell 2016)	Pt7	Cutaneous Melanoma	R94I	OncoKB: NA;CIViC: NA;MyCancerGenome: not present;CancerHotspot: no;3DHotspot: no	MutationAssessor: impact: high, score: 4.575;SIFT: impact: deleterious_low_confidence, score: 0;Polyphen-2: impact: probably_damaging, score: 0.988	Missense_Mutation			NA	NA	NA	6	25727417	25727417	G	T							1164
Cutaneous Squamous Cell Carcinoma (MD Anderson, Clin Cancer Res 2014)	CSCC-27-T	Cutaneous Squamous Cell Carcinoma	R94K	OncoKB: NA;CIViC: NA;MyCancerGenome: not present;CancerHotspot: no;3DHotspot: no	MutationAssessor: impact: high, score: 3.535;SIFT: impact: deleterious_low_confidence, score: 0.03;Polyphen-2: impact: probably_damaging, score: 0.935	Missense_Mutation			Somatic	Untested	hgsc.bcm.edu	6	25727417	25727417	G	A			25	94		104	7301
Colorectal Adenocarcinoma (TCGA, Provisional)	TCGA-AA-A010-01	Colon Adenocarcinoma	R101C	OncoKB: NA;CIViC: NA;MyCancerGenome: not present;CancerHotspot: no;3DHotspot: no	MutationAssessor: impact: medium, score: 3.305;SIFT: impact: tolerated_low_confidence, score: 0.07;Polyphen-2: impact: benign, score: 0.357	Missense_Mutation			Somatic	Valid	broad.mit.edu	6	25727437	25727437	C	T							6561
Breast Invasive Carcinoma (TCGA, Provisional)	TCGA-D8-A1XQ-01	Breast Invasive Ductal Carcinoma	P105L	OncoKB: NA;CIViC: NA;MyCancerGenome: not present;CancerHotspot: no;3DHotspot: no	MutationAssessor: impact: medium, score: 3.38;SIFT: impact: deleterious_low_confidence, score: 0.03;Polyphen-2: impact: probably_damaging, score: 1	Missense_Mutation			Somatic	Untested	genome.wustl.edu	6	25727450	25727450	C	T			55	434			549
Breast Invasive Carcinoma (Sanger, Nature 2012)	PD4103a	Invasive Breast Carcinoma	G106R	OncoKB: NA;CIViC: NA;MyCancerGenome: not present;CancerHotspot: no;3DHotspot: no	MutationAssessor: impact: medium, score: 2.75;SIFT: impact: deleterious_low_confidence, score: 0.01;Polyphen-2: impact: probably_damaging, score: 0.999	Missense_Mutation			Unknown	Unknown	Sanger	6	25727452	25727452	G	C							37
Head and Neck Squamous Cell Carcinoma (TCGA, Provisional)	TCGA-T3-A92N-01	Head and Neck Squamous Cell Carcinoma	A109V	OncoKB: NA;CIViC: NA;MyCancerGenome: not present;CancerHotspot: no;3DHotspot: no	MutationAssessor: impact: high, score: 3.6;SIFT: impact: deleterious_low_confidence, score: 0.03;Polyphen-2: impact: possibly_damaging, score: 0.779	Missense_Mutation			Somatic	NA	broad.mit.edu	6	25727462	25727462	C	T			17	28			148
Merged Cohort of LGG and GBM (TCGA, Cell 2016)	TCGA-14-1034-01	Diffuse Glioma	T117A	OncoKB: NA;CIViC: NA;MyCancerGenome: not present;CancerHotspot: no;3DHotspot: no	MutationAssessor: impact: high, score: 4.03;SIFT: impact: deleterious_low_confidence, score: 0.02;Polyphen-2: impact: probably_damaging, score: 0.992	Missense_Mutation			NA	NA	ucsc.edu/broad.mit.edu	6	25727485	25727485	A	G			13	55		96	60
Glioblastoma Multiforme (TCGA, Provisional)	TCGA-14-1034-02	Glioblastoma Multiforme	T117A	OncoKB: NA;CIViC: NA;MyCancerGenome: not present;CancerHotspot: no;3DHotspot: no	MutationAssessor: impact: high, score: 4.03;SIFT: impact: deleterious_low_confidence, score: 0.02;Polyphen-2: impact: probably_damaging, score: 0.992	Missense_Mutation			Somatic	Untested	broad.mit.edu	6	25727485	25727485	A	G							69
Head and Neck Squamous Cell Carcinoma (TCGA, Provisional)	TCGA-P3-A6SX-01	Head and Neck Squamous Cell Carcinoma	T121N	OncoKB: NA;CIViC: NA;MyCancerGenome: not present;CancerHotspot: no;3DHotspot: no	MutationAssessor: impact: medium, score: 3.29;SIFT: impact: deleterious_low_confidence, score: 0;Polyphen-2: impact: probably_damaging, score: 0.931	Missense_Mutation			Somatic	NA	broad.mit.edu	6	25727498	25727498	C	A			20	30			161
Uterine Corpus Endometrial Carcinoma (TCGA, PanCancer Atlas)	TCGA-AP-A1DV-01	Uterine Endometrioid Carcinoma	E3D	OncoKB: NA;CIViC: NA;MyCancerGenome: not present;CancerHotspot: no;3DHotspot: no	MutationAssessor: impact: low, score: 1.38;SIFT: impact: tolerated_low_confidence, score: 0.08;Polyphen-2: impact: benign, score: 0	Missense_Mutation	diploid		.	.	.	6	25727145	25727145	G	T	0.4		12	18		30	12071	2019-01-01	ENST00000274764.2:c.9G>T
Uterine Corpus Endometrial Carcinoma (TCGA, PanCancer Atlas)	TCGA-B5-A3FC-01	Uterine Endometrioid Carcinoma	V4M	OncoKB: NA;CIViC: NA;MyCancerGenome: not present;CancerHotspot: no;3DHotspot: no	MutationAssessor: impact: neutral, score: 0;SIFT: impact: tolerated_low_confidence, score: 0.09;Polyphen-2: impact: benign, score: 0.015	Missense_Mutation	diploid		.	.	.	6	25727146	25727146	G	A	0.48		13	14		41	12217	2019-01-01	ENST00000274764.2:c.10G>A
Uterine Corpus Endometrial Carcinoma (TCGA, PanCancer Atlas)	TCGA-AX-A0J1-01	Uterine Endometrioid Carcinoma	V20G	OncoKB: NA;CIViC: NA;MyCancerGenome: not present;CancerHotspot: no;3DHotspot: no	MutationAssessor: impact: medium, score: 2.325;SIFT: impact: deleterious_low_confidence, score: 0.02;Polyphen-2: impact: benign, score: 0.037	Missense_Mutation	diploid		.	.	.	6	25727195	25727195	T	G	0.11		12	99		106	5128	2019-01-01	ENST00000274764.2:c.59T>G
Stomach Adenocarcinoma (TCGA, PanCancer Atlas)	TCGA-ZQ-A9CR-01	Tubular Stomach Adenocarcinoma	V21I	OncoKB: NA;CIViC: NA;MyCancerGenome: not present;CancerHotspot: no;3DHotspot: no	MutationAssessor: impact: neutral, score: -0.69;SIFT: impact: deleterious_low_confidence, score: 0.04;Polyphen-2: impact: benign, score: 0	Missense_Mutation	diploid		.	.	.	6	25727197	25727197	G	A	0.1		8	71		74	103	2019-01-01	ENST00000274764.2:c.61G>A
Uterine Corpus Endometrial Carcinoma (TCGA, PanCancer Atlas)	TCGA-B5-A0JV-01	Uterine Endometrioid Carcinoma	V21I	OncoKB: NA;CIViC: NA;MyCancerGenome: not present;CancerHotspot: no;3DHotspot: no	MutationAssessor: impact: neutral, score: -0.69;SIFT: impact: deleterious_low_confidence, score: 0.04;Polyphen-2: impact: benign, score: 0	Missense_Mutation	diploid		.	.	.	6	25727197	25727197	G	A	0.04		40	974		857	346	2019-01-01	ENST00000274764.2:c.61G>A
Uterine Corpus Endometrial Carcinoma (TCGA, PanCancer Atlas)	TCGA-AX-A06F-01	Uterine Endometrioid Carcinoma	R31C	OncoKB: NA;CIViC: NA;MyCancerGenome: not present;CancerHotspot: no;3DHotspot: no	MutationAssessor: impact: medium, score: 2.015;SIFT: impact: tolerated_low_confidence, score: 0.09;Polyphen-2: impact: benign, score: 0.41	Missense_Mutation	diploid		.	.	.	6	25727227	25727227	C	T	0.38	0.01	53	87	1	117	7289	2019-01-01	ENST00000274764.2:c.91C>T
Uterine Corpus Endometrial Carcinoma (TCGA, PanCancer Atlas)	TCGA-A5-A0G2-01	Uterine Serous Carcinoma/Uterine Papillary Serous Carcinoma	K36N	OncoKB: NA;CIViC: NA;MyCancerGenome: not present;CancerHotspot: no;3DHotspot: no	MutationAssessor: impact: medium, score: 2.935;SIFT: impact: deleterious_low_confidence, score: 0.01;Polyphen-2: impact: probably_damaging, score: 0.996	Missense_Mutation	diploid		.	.	.	6	25727244	25727244	G	T	0.39		44	68		142	25730	2019-01-01	ENST00000274764.2:c.108G>T
Uterine Corpus Endometrial Carcinoma (TCGA, PanCancer Atlas)	TCGA-AP-A1DV-01	Uterine Endometrioid Carcinoma	S40F	OncoKB: NA;CIViC: NA;MyCancerGenome: not present;CancerHotspot: no;3DHotspot: no	MutationAssessor: impact: medium, score: 2.525;SIFT: impact: deleterious_low_confidence, score: 0.02;Polyphen-2: impact: possibly_damaging, score: 0.657	Missense_Mutation	diploid		.	.	.	6	25727255	25727255	C	T	0.46		13	15		31	12071	2019-01-01	ENST00000274764.2:c.119C>T
The Angiosarcoma Project - Count Me In (Provisional, September 2018)	Angio-ASCProject_3NflfGHo-Tumor-SM-DADBW	Angiosarcoma	P52L	OncoKB: NA;CIViC: NA;MyCancerGenome: not present;CancerHotspot: no;3DHotspot: no	MutationAssessor: impact: medium, score: 3.335;SIFT: impact: tolerated_low_confidence, score: 0.07;Polyphen-2: impact: benign, score: 0.234	Missense_Mutation	diploid		Somatic	NA	broad.mit.edu	6	25727291	25727291	C	T							13	2019-01-01	ENST00000274764.2:c.155C>T
Metastatic Prostate Adenocarcinoma (SU2C/PCF Dream Team, PNAS 2019)	DFCI.11-104.13-Tumor	Prostate Adenocarcinoma	D53Y	OncoKB: NA;CIViC: NA;MyCancerGenome: not present;CancerHotspot: no;3DHotspot: no	MutationAssessor: impact: high, score: 3.825;SIFT: impact: deleterious_low_confidence, score: 0;Polyphen-2: impact: probably_damaging, score: 0.989	Missense_Mutation	gain		Somatic	Untested	broad.mit.edu	6	25727293	25727293	G	T	0.21		16	62			48	2019-01-01	ENST00000274764.2:c.157G>T
MSS Mixed Solid Tumors (Broad/Dana-Farber, Nat Genet 2018)	MEL-IPI_Pat07-Tumor-SM-4DK13	Cutaneous Melanoma	G55S	OncoKB: NA;CIViC: NA;MyCancerGenome: not present;CancerHotspot: no;3DHotspot: no	MutationAssessor: impact: medium, score: 2.245;SIFT: impact: tolerated_low_confidence, score: 0.06;Polyphen-2: impact: probably_damaging, score: 0.935	Missense_Mutation			NA	NA	NA	6	25727299	25727299	G	A	0.09		29	284			173	2019-01-01	ENST00000274764.2:c.163G>A
Skin Cutaneous Melanoma (TCGA, PanCancer Atlas)	TCGA-WE-AAA0-06	Cutaneous Melanoma	S58L	OncoKB: NA;CIViC: NA;MyCancerGenome: not present;CancerHotspot: no;3DHotspot: no	MutationAssessor: impact: high, score: 3.575;SIFT: impact: deleterious_low_confidence, score: 0;Polyphen-2: impact: probably_damaging, score: 0.949	Missense_Mutation	gain		.	.	.	6	25727309	25727309	C	T	0.22		16	58		56	1220	2019-01-01	ENST00000274764.2:c.173C>T
Uterine Corpus Endometrial Carcinoma (TCGA, PanCancer Atlas)	TCGA-EO-A3AY-01	Uterine Endometrioid Carcinoma	S58L	OncoKB: NA;CIViC: NA;MyCancerGenome: not present;CancerHotspot: no;3DHotspot: no	MutationAssessor: impact: high, score: 3.575;SIFT: impact: deleterious_low_confidence, score: 0;Polyphen-2: impact: probably_damaging, score: 0.949	Missense_Mutation	diploid		.	.	.	6	25727309	25727309	C	T	0.28		21	53		26	3387	2019-01-01	ENST00000274764.2:c.173C>T
Brain Lower Grade Glioma (TCGA, PanCancer Atlas)	TCGA-DU-6392-01	Astrocytoma	A76S	OncoKB: NA;CIViC: NA;MyCancerGenome: not present;CancerHotspot: no;3DHotspot: no	MutationAssessor: impact: medium, score: 3.23;SIFT: impact: deleterious_low_confidence, score: 0.03;Polyphen-2: impact: benign, score: 0.01	Missense_Mutation	diploid		.	.	.	6	25727362	25727362	G	T	0.37		20	34		74	10869	2019-01-01	ENST00000274764.2:c.226G>T
Uterine Corpus Endometrial Carcinoma (TCGA, PanCancer Atlas)	TCGA-AJ-A3BH-01	Uterine Endometrioid Carcinoma	R81C	OncoKB: NA;CIViC: NA;MyCancerGenome: not present;CancerHotspot: no;3DHotspot: no	MutationAssessor: impact: medium, score: 2.89;SIFT: impact: tolerated_low_confidence, score: 0.08;Polyphen-2: impact: probably_damaging, score: 0.997	Missense_Mutation	diploid		.	.	.	6	25727377	25727377	C	T	0.27		7	19		28	2681	2019-01-01	ENST00000274764.2:c.241C>T
Uterine Corpus Endometrial Carcinoma (TCGA, PanCancer Atlas)	TCGA-AP-A1DV-01	Uterine Endometrioid Carcinoma	R88H	OncoKB: NA;CIViC: NA;MyCancerGenome: not present;CancerHotspot: no;3DHotspot: no	MutationAssessor: impact: medium, score: 2.595;SIFT: impact: tolerated_low_confidence, score: 0.15;Polyphen-2: impact: benign, score: 0.029	Missense_Mutation	diploid		.	.	.	6	25727399	25727399	G	A	0.45		15	18		30	12071	2019-01-01	ENST00000274764.2:c.263G>A
Uterine Corpus Endometrial Carcinoma (TCGA, PanCancer Atlas)	TCGA-AX-A2HD-01	Uterine Endometrioid Carcinoma	R88H	OncoKB: NA;CIViC: NA;MyCancerGenome: not present;CancerHotspot: no;3DHotspot: no	MutationAssessor: impact: medium, score: 2.595;SIFT: impact: tolerated_low_confidence, score: 0.15;Polyphen-2: impact: benign, score: 0.029	Missense_Mutation	diploid		.	.	.	6	25727399	25727399	G	A	0.59		23	16		40	7854	2019-01-01	ENST00000274764.2:c.263G>A
Uterine Corpus Endometrial Carcinoma (TCGA, PanCancer Atlas)	TCGA-EY-A1GI-01	Uterine Endometrioid Carcinoma	R101H	OncoKB: NA;CIViC: NA;MyCancerGenome: not present;CancerHotspot: no;3DHotspot: no	MutationAssessor: impact: high, score: 3.995;SIFT: impact: deleterious_low_confidence, score: 0.05;Polyphen-2: impact: probably_damaging, score: 0.993	Missense_Mutation	diploid		.	.	.	6	25727438	25727438	G	A	0.19		4	17		38	4491	2019-01-01	ENST00000274764.2:c.302G>A
MSS Mixed Solid Tumors (Broad/Dana-Farber, Nat Genet 2018)	MEL-IPI_Pat168-Tumor-SM-5VOAX	Cutaneous Melanoma	V113G	OncoKB: NA;CIViC: NA;MyCancerGenome: not present;CancerHotspot: no;3DHotspot: no	MutationAssessor: impact: medium, score: 3.335;SIFT: impact: deleterious_low_confidence, score: 0.01;Polyphen-2: impact: probably_damaging, score: 0.941	Missense_Mutation			NA	NA	NA	6	25727474	25727474	T	G	0.37		7	12			269	2019-01-01	ENST00000274764.2:c.338T>G

## Sheet: HIST1H2BB
Study	Sample ID	Cancer Type	Protein Change	Annotation	Functional Impact	Mutation Type	Copy #	COSMIC	MS	VS	Center	Chromosome	Start Pos	End Pos	Ref	Var	Allele Freq (T)	Allele Freq (N)	Variant Reads	Ref Reads	Variant Reads (N)	Ref Reads (N)	# Mut in Sample
Bladder Cancer (TCGA, Cell 2017)	TCGA-ZF-AA56-01	Bladder Urothelial Carcinoma	S5T	OncoKB: NA;CIViC: NA;MyCancerGenome: not present;CancerHotspot: no;3DHotspot: no	MutationAssessor: impact: neutral, score: 0.145;SIFT: impact: tolerated_low_confidence, score: 0.08;Polyphen-2: impact: benign, score: 0.006	Missense_Mutation		1	Somatic	NaN	broad.mit.edu	6	26043873	26043873	A	T				39			99
TCGA data for Esophagus-Stomach Cancers (TCGA, Nature 2017)	TCGA-L5-A8NK-01	Esophageal Squamous Cell Carcinoma	S5Y	OncoKB: NA;CIViC: NA;MyCancerGenome: not present;CancerHotspot: no;3DHotspot: no	MutationAssessor: impact: neutral, score: 0.695;SIFT: impact: deleterious_low_confidence, score: 0;Polyphen-2: impact: benign, score: 0.039	Missense_Mutation		1	Somatic	Untested	genome.wustl.edu	6	26043872	26043872	G	T			12	45		42	263
Pediatric Acute Myeloid Leukemia (TARGET, 2018)	TARGET-20-PANLIZ-09	Acute Myeloid Leukemia	A10T	OncoKB: NA;CIViC: NA;MyCancerGenome: not present;CancerHotspot: no;3DHotspot: no	MutationAssessor: impact: medium, score: 1.95;SIFT: impact: deleterious_low_confidence, score: 0.04;Polyphen-2: impact: probably_damaging, score: 0.975	Missense_Mutation			Somatic	Valid	TARGET	6	26043858	26043858	C	T			21	30			19
Pan-Lung Cancer (TCGA, Nat Genet 2016)	TCGA-77-7337-01	Lung Squamous Cell Carcinoma	G14R	OncoKB: NA;CIViC: NA;MyCancerGenome: not present;CancerHotspot: no;3DHotspot: no	MutationAssessor: impact: medium, score: 2.89;SIFT: impact: deleterious_low_confidence, score: 0;Polyphen-2: impact: probably_damaging, score: 0.999	Missense_Mutation			Somatic	NA	broad.mit.edu	6	26043846	26043846	C	G			7	67		71	292
Thymoma (TCGA, Provisional)	TCGA-ZC-AAA7-01	Thymoma	S15F	OncoKB: NA;CIViC: NA;MyCancerGenome: not present;CancerHotspot: no;3DHotspot: no	MutationAssessor: impact: medium, score: 2.555;SIFT: impact: tolerated_low_confidence, score: 0.19;Polyphen-2: impact: probably_damaging, score: 0.991	Missense_Mutation		1	Somatic	Valid	genome.wustl.edu	6	26043842	26043842	G	A							59
Uterine Corpus Endometrial Carcinoma (TCGA, Provisional)	TCGA-AP-A059-01	Uterine Endometrioid Carcinoma	S15Y	OncoKB: NA;CIViC: NA;MyCancerGenome: not present;CancerHotspot: no;3DHotspot: no	MutationAssessor: impact: medium, score: 2.9;SIFT: impact: tolerated_low_confidence, score: 0.07;Polyphen-2: impact: probably_damaging, score: 0.991	Missense_Mutation		1	Somatic	Untested	genome.wustl.edu	6	26043842	26043842	G	T			82	264		373	9247
Head and Neck Squamous Cell Carcinoma (TCGA, Provisional)	TCGA-CN-A63U-01	Head and Neck Squamous Cell Carcinoma	K21M	OncoKB: NA;CIViC: NA;MyCancerGenome: not present;CancerHotspot: no;3DHotspot: no	MutationAssessor: impact: medium, score: 2.84;SIFT: impact: deleterious_low_confidence, score: 0.01;Polyphen-2: impact: benign, score: 0.105	Missense_Mutation			Somatic	NA	broad.mit.edu	6	26043824	26043824	T	A			71	117			497
Pancreatic Adenocarcinoma (QCMG, Nature 2016)	ICGC_0075	Pancreatic Adenocarcinoma	K24N	OncoKB: NA;CIViC: NA;MyCancerGenome: not present;CancerHotspot: no;3DHotspot: no	MutationAssessor: impact: medium, score: 2.195;SIFT: impact: deleterious_low_confidence, score: 0.01;Polyphen-2: impact: benign, score: 0.001	Missense_Mutation		1	Somatic	NA	qcmg.uq.edu.au	6	26043814	26043814	C	G							49
Colon Adenocarcinoma (TCGA, PanCancer Atlas)	TCGA-DM-A288-01	Mucinous Adenocarcinoma of the Colon and Rectum	K25R	OncoKB: NA;CIViC: NA;MyCancerGenome: not present;CancerHotspot: no;3DHotspot: no	MutationAssessor: impact: medium, score: 2.76;SIFT: impact: deleterious_low_confidence, score: 0.03;Polyphen-2: impact: benign, score: 0.035	Missense_Mutation		1	.	.	.	6	26043812	26043812	T	C			68	85		98	74
Skin Cutaneous Melanoma(Broad, Cancer Discov 2014)	Pat_28_Post	Melanoma	D26N	OncoKB: NA;CIViC: NA;MyCancerGenome: not present;CancerHotspot: no;3DHotspot: no	MutationAssessor: impact: medium, score: 2.78;SIFT: impact: tolerated_low_confidence, score: 0.05;Polyphen-2: impact: probably_damaging, score: 0.974	Missense_Mutation			NA	NA	broad.mit.edu	6	26043810	26043810	C	T			53	226			906
Head and Neck Squamous Cell Carcinoma (TCGA, Provisional)	TCGA-CR-7365-01	Head and Neck Squamous Cell Carcinoma	K28N	OncoKB: NA;CIViC: NA;MyCancerGenome: not present;CancerHotspot: no;3DHotspot: no	MutationAssessor: impact: medium, score: 2.945;SIFT: impact: deleterious_low_confidence, score: 0;Polyphen-2: impact: probably_damaging, score: 0.986	Missense_Mutation			Somatic	NA	broad.mit.edu	6	26043802	26043802	C	G			38	117			152
Mixed Tumors (PIP-Seq 2017)	PIP15-18739-T1	Ewing Sarcoma	S33T	OncoKB: NA;CIViC: NA;MyCancerGenome: not present;CancerHotspot: no;3DHotspot: no	MutationAssessor: impact: neutral, score: 0.74;SIFT: impact: tolerated_low_confidence, score: 0.11;Polyphen-2: impact: benign, score: 0.205	Missense_Mutation			NA	NA	.	6	26043788	26043788	C	G							2334
Pan-Lung Cancer (TCGA, Nat Genet 2016)	TCGA-85-8582-01	Lung Squamous Cell Carcinoma	E36D	OncoKB: NA;CIViC: NA;MyCancerGenome: not present;CancerHotspot: no;3DHotspot: no	MutationAssessor: impact: medium, score: 2.6;SIFT: impact: deleterious_low_confidence, score: 0.02;Polyphen-2: impact: benign, score: 0.036	Missense_Mutation		1	Somatic	NA	broad.mit.edu	6	26043778	26043778	C	A			23	263		280	282
Pan-Lung Cancer (TCGA, Nat Genet 2016)	TCGA-78-7152-01	Lung Adenocarcinoma	E36K	OncoKB: NA;CIViC: NA;MyCancerGenome: not present;CancerHotspot: no;3DHotspot: no	MutationAssessor: impact: high, score: 3.66;SIFT: impact: deleterious_low_confidence, score: 0.01;Polyphen-2: impact: probably_damaging, score: 0.913	Missense_Mutation		1	Somatic	NA	broad.mit.edu	6	26043780	26043780	C	T			49	183		233	173
TCGA data for Esophagus-Stomach Cancers (TCGA, Nature 2017)	TCGA-CG-4305-01	Stomach Adenocarcinoma	S37I	OncoKB: NA;CIViC: NA;MyCancerGenome: not present;CancerHotspot: no;3DHotspot: no	MutationAssessor: impact: high, score: 3.61;SIFT: impact: deleterious_low_confidence, score: 0;Polyphen-2: impact: possibly_damaging, score: 0.889	Missense_Mutation		1	Somatic	Untested	genome.wustl.edu	6	26043776	26043776	C	A			40	228		273	1237
NCI-60 Cell Lines (NCI, Cancer Res. 2012)	DU_145	Prostate	S37N	OncoKB: NA;CIViC: NA;MyCancerGenome: not present;CancerHotspot: no;3DHotspot: no	MutationAssessor: impact: medium, score: 2.57;SIFT: impact: deleterious_low_confidence, score: 0.04;Polyphen-2: impact: benign, score: 0.006	Missense_Mutation		1	NA	NA	discover.nci.nih.gov	6	26043776	26043776	C	T							1374
Oral Squamous Cell Carcinoma (MD Anderson, Cancer Discov 2013)	OSCJM-PT50-575-T	Head and Neck Squamous Cell Carcinoma	Y38D	OncoKB: NA;CIViC: NA;MyCancerGenome: not present;CancerHotspot: no;3DHotspot: no	MutationAssessor: impact: high, score: 4.035;SIFT: impact: deleterious_low_confidence, score: 0;Polyphen-2: impact: probably_damaging, score: 0.994	Missense_Mutation		1	Somatic	Valid	hgsc.bcm.edu	6	26043774	26043774	A	C							83
Breast Invasive Carcinoma (TCGA, Provisional)	TCGA-A2-A0T5-01	Breast Invasive Ductal Carcinoma	H50P	OncoKB: NA;CIViC: NA;MyCancerGenome: not present;CancerHotspot: no;3DHotspot: no	MutationAssessor: impact: high, score: 3.925;SIFT: impact: deleterious_low_confidence, score: 0.01;Polyphen-2: impact: probably_damaging, score: 0.925	Missense_Mutation		1	Somatic	Untested	genome.wustl.edu	6	26043737	26043737	T	G			33	229			1069
The Metastatic Breast Cancer Project (Provisional, April 2018)	MBC-MBCProject_W2CQswiv-Tumor-SM-GQCPM	Breast Invasive Ductal Carcinoma	P51S	OncoKB: NA;CIViC: NA;MyCancerGenome: not present;CancerHotspot: no;3DHotspot: no	MutationAssessor: impact: medium, score: 3.045;SIFT: impact: deleterious_low_confidence, score: 0.02;Polyphen-2: impact: benign, score: 0.041	Missense_Mutation			Somatic	---	broad.mit.edu	6	26043735	26043735	G	A							19
Lung Adenocarcinoma (Broad, Cell 2012)	LUAD-CHTN-3090415	Lung Adenocarcinoma	G54D	OncoKB: NA;CIViC: NA;MyCancerGenome: not present;CancerHotspot: no;3DHotspot: no	MutationAssessor: impact: high, score: 4.525;SIFT: impact: deleterious_low_confidence, score: 0;Polyphen-2: impact: possibly_damaging, score: 0.759	Missense_Mutation			Unknown	NA	broad.mit.edu	6	26043725	26043725	C	T							217
Bladder Cancer (TCGA, Cell 2017)	TCGA-GU-A767-01	Bladder Urothelial Carcinoma	S56L	OncoKB: NA;CIViC: NA;MyCancerGenome: not present;CancerHotspot: no;3DHotspot: no	MutationAssessor: impact: high, score: 4.13;SIFT: impact: deleterious_low_confidence, score: 0.04;Polyphen-2: impact: benign, score: 0.056	Missense_Mutation			Somatic	NaN	broad.mit.edu	6	26043719	26043719	G	A				172			399
Uterine Corpus Endometrial Carcinoma (TCGA, Provisional)	TCGA-D1-A15X-01	Uterine Serous Carcinoma/Uterine Papillary Serous Carcinoma	S57T	OncoKB: NA;CIViC: NA;MyCancerGenome: not present;CancerHotspot: no;3DHotspot: no	MutationAssessor: impact: medium, score: 2.54;SIFT: impact: deleterious_low_confidence, score: 0.03;Polyphen-2: impact: benign, score: 0.084	Missense_Mutation		1	Somatic	Untested	genome.wustl.edu	6	26043717	26043717	A	T			170	430		485	1332
Skin Cutaneous Melanoma (TCGA, Provisional)	TCGA-EE-A2MI-06	Cutaneous Melanoma	M63I	OncoKB: NA;CIViC: NA;MyCancerGenome: not present;CancerHotspot: no;3DHotspot: no	MutationAssessor: impact: medium, score: 3.205;SIFT: impact: deleterious_low_confidence, score: 0.02;Polyphen-2: impact: benign, score: 0.02	Missense_Mutation		1	Somatic	NA	broad.mit.edu	6	26043697	26043697	C	T			33	130			881
Skin Cutaneous Melanoma (Broad, Cell 2012)	MEL-Ma-Mel-35	Cutaneous Melanoma	N64S	OncoKB: NA;CIViC: NA;MyCancerGenome: not present;CancerHotspot: no;3DHotspot: no	MutationAssessor: impact: high, score: 3.925;SIFT: impact: deleterious_low_confidence, score: 0;Polyphen-2: impact: benign, score: 0.009	Missense_Mutation			NA	NA	broad.mit.edu	6	26043695	26043695	T	C							942
Mutational profiles of metastatic breast cancer (France, 2016)	MBC_211	Invasive Breast Carcinoma	D69H	OncoKB: NA;CIViC: NA;MyCancerGenome: not present;CancerHotspot: no;3DHotspot: no	MutationAssessor: impact: high, score: 3.775;SIFT: impact: deleterious_low_confidence, score: 0.01;Polyphen-2: impact: benign, score: 0.327	Missense_Mutation			Somatic	NA	GR	6	26043681	26043681	C	G			125	56		55	44
Breast Invasive Carcinoma (TCGA, Provisional)	TCGA-BH-A0DS-01	Breast Invasive Ductal Carcinoma	E72K	OncoKB: NA;CIViC: NA;MyCancerGenome: not present;CancerHotspot: no;3DHotspot: yes	MutationAssessor: impact: high, score: 3.72;SIFT: impact: deleterious_low_confidence, score: 0.03;Polyphen-2: impact: benign, score: 0.01	Missense_Mutation		1	Somatic	Untested	genome.wustl.edu	6	26043672	26043672	C	T			47	80			23
Pan-Lung Cancer (TCGA, Nat Genet 2016)	TCGA-62-A471-01	Lung Adenocarcinoma	E72Q	OncoKB: NA;CIViC: NA;MyCancerGenome: not present;CancerHotspot: no;3DHotspot: yes	MutationAssessor: impact: medium, score: 3.485;SIFT: impact: deleterious_low_confidence, score: 0.02;Polyphen-2: impact: benign, score: 0.014	Missense_Mutation		1	Somatic	NA	broad.mit.edu	6	26043672	26043672	C	G			63	127		188	89
Breast Invasive Carcinoma (TCGA, Provisional)	TCGA-AN-A0AK-01	Breast Invasive Ductal Carcinoma	R73C	OncoKB: NA;CIViC: NA;MyCancerGenome: not present;CancerHotspot: no;3DHotspot: yes	MutationAssessor: impact: medium, score: 3.36;SIFT: impact: tolerated_low_confidence, score: 0.11;Polyphen-2: impact: benign, score: 0.002	Missense_Mutation		1	Somatic	Untested	genome.wustl.edu	6	26043669	26043669	G	A			38	82			911
Head and Neck Squamous Cell Carcinoma (TCGA, Provisional)	TCGA-CR-6478-01	Head and Neck Squamous Cell Carcinoma	A75V	OncoKB: NA;CIViC: NA;MyCancerGenome: not present;CancerHotspot: no;3DHotspot: yes	MutationAssessor: impact: medium, score: 2.805;SIFT: impact: deleterious_low_confidence, score: 0.01;Polyphen-2: impact: benign, score: 0.018	Missense_Mutation			Somatic	NA	broad.mit.edu	6	26043662	26043662	G	A			36	89			110
Colorectal Adenocarcinoma (DFCI, Cell Reports 2016)	coadread_dfci_2016_92	Colorectal Adenocarcinoma	E77D	OncoKB: NA;CIViC: NA;MyCancerGenome: not present;CancerHotspot: no;3DHotspot: no	MutationAssessor: impact: high, score: 3.975;SIFT: impact: deleterious_low_confidence, score: 0.01;Polyphen-2: impact: benign, score: 0.035	Missense_Mutation			NA	NA	dfci.harvard.edu	6	26043655	26043655	C	A							903
Rectum Adenocarcinoma (TCGA, PanCancer Atlas)	TCGA-DY-A1DF-01	Rectal Adenocarcinoma	E77K	OncoKB: NA;CIViC: NA;MyCancerGenome: not present;CancerHotspot: no;3DHotspot: no	MutationAssessor: impact: medium, score: 3.425;SIFT: impact: deleterious_low_confidence, score: 0.04;Polyphen-2: impact: benign, score: 0.442	Missense_Mutation			.	.	.	6	26043657	26043657	C	T			6	67		162	124
Breast Invasive Carcinoma (TCGA, Provisional)	TCGA-A7-A0DA-01	Breast Invasive Ductal Carcinoma	E94D	OncoKB: NA;CIViC: NA;MyCancerGenome: not present;CancerHotspot: no;3DHotspot: yes	MutationAssessor: impact: medium, score: 2.87;SIFT: impact: deleterious_low_confidence, score: 0.02;Polyphen-2: impact: benign, score: 0.03	Missense_Mutation		1	Somatic	Untested	genome.wustl.edu	6	26043604	26043604	C	G			100	346			103
Liver Hepatocellular Carcinoma (TCGA, Provisional)	TCGA-DD-A113-01	Hepatocellular Carcinoma	T97M	OncoKB: NA;CIViC: NA;MyCancerGenome: not present;CancerHotspot: no;3DHotspot: yes	MutationAssessor: impact: high, score: 3.895;SIFT: impact: deleterious_low_confidence, score: 0.02;Polyphen-2: impact: probably_damaging, score: 0.968	Missense_Mutation		1	Somatic	Untested	hgsc.bcm.edu	6	26043596	26043596	G	A			12	163	1	159	120
Colon Adenocarcinoma (TCGA, PanCancer Atlas)	TCGA-AD-5900-01	Mucinous Adenocarcinoma of the Colon and Rectum	T97M	OncoKB: NA;CIViC: NA;MyCancerGenome: not present;CancerHotspot: no;3DHotspot: yes	MutationAssessor: impact: high, score: 3.895;SIFT: impact: deleterious_low_confidence, score: 0.02;Polyphen-2: impact: probably_damaging, score: 0.968	Missense_Mutation		1	.	.	.	6	26043596	26043596	G	A			39	108		205	1477
Colon Adenocarcinoma (TCGA, PanCancer Atlas)	TCGA-NH-A6GC-01	Mucinous Adenocarcinoma of the Colon and Rectum	A98S	OncoKB: NA;CIViC: NA;MyCancerGenome: not present;CancerHotspot: no;3DHotspot: no	MutationAssessor: impact: medium, score: 2.48;SIFT: impact: deleterious_low_confidence, score: 0.05;Polyphen-2: impact: benign, score: 0.114	Missense_Mutation			.	.	.	6	26043594	26043594	C	A			14	76		142	115
Colorectal Adenocarcinoma (TCGA, Provisional)	TCGA-AG-3892-01	Rectal Adenocarcinoma	R100C	OncoKB: NA;CIViC: NA;MyCancerGenome: not present;CancerHotspot: no;3DHotspot: no	MutationAssessor: impact: medium, score: 2.98;SIFT: impact: tolerated_low_confidence, score: 0.09;Polyphen-2: impact: benign, score: 0.001	Missense_Mutation		1	Somatic	Unknown	broad.mit.edu	6	26043588	26043588	G	A							1859
Colorectal Adenocarcinoma (DFCI, Cell Reports 2016)	coadread_dfci_2016_3701	Colorectal Adenocarcinoma	P104S	OncoKB: NA;CIViC: NA;MyCancerGenome: not present;CancerHotspot: no;3DHotspot: no	MutationAssessor: impact: high, score: 4.015;SIFT: impact: deleterious_low_confidence, score: 0;Polyphen-2: impact: probably_damaging, score: 1	Missense_Mutation			NA	NA	dfci.harvard.edu	6	26043576	26043576	G	A							1235
Pan-Lung Cancer (TCGA, Nat Genet 2016)	TCGA-49-AARN-01	Lung Adenocarcinoma	E114K	OncoKB: NA;CIViC: NA;MyCancerGenome: not present;CancerHotspot: no;3DHotspot: no	MutationAssessor: impact: medium, score: 3.39;SIFT: impact: tolerated_low_confidence, score: 0.07;Polyphen-2: impact: benign, score: 0.003	Missense_Mutation			Somatic	NA	broad.mit.edu	6	26043546	26043546	C	T			7	36		44	997
TCGA data for Esophagus-Stomach Cancers (TCGA, Nature 2017)	TCGA-V5-AASX-01	Esophageal Adenocarcinoma	E114K	OncoKB: NA;CIViC: NA;MyCancerGenome: not present;CancerHotspot: no;3DHotspot: no	MutationAssessor: impact: medium, score: 3.39;SIFT: impact: tolerated_low_confidence, score: 0.07;Polyphen-2: impact: benign, score: 0.003	Missense_Mutation			Somatic	Untested	genome.wustl.edu	6	26043546	26043546	C	T			11	109		97	327
Bladder Cancer (TCGA, Cell 2017)	TCGA-DK-AA6X-01	Bladder Urothelial Carcinoma	E114K	OncoKB: NA;CIViC: NA;MyCancerGenome: not present;CancerHotspot: no;3DHotspot: no	MutationAssessor: impact: medium, score: 3.39;SIFT: impact: tolerated_low_confidence, score: 0.07;Polyphen-2: impact: benign, score: 0.003	Missense_Mutation			Somatic	NaN	broad.mit.edu	6	26043546	26043546	C	T				34			114
Colorectal Adenocarcinoma (TCGA, Provisional)	TCGA-AG-A002-01	Rectal Adenocarcinoma	Y122C	OncoKB: NA;CIViC: NA;MyCancerGenome: not present;CancerHotspot: no;3DHotspot: no	MutationAssessor: impact: high, score: 4.085;SIFT: impact: deleterious_low_confidence, score: 0.01;Polyphen-2: impact: benign, score: 0.008	Missense_Mutation		1	Somatic	Unknown	broad.mit.edu	6	26043521	26043521	T	C							9925
Brain Lower Grade Glioma (TCGA, PanCancer Atlas)	TCGA-DU-8163-01	Oligoastrocytoma	P9A	OncoKB: NA;CIViC: NA;MyCancerGenome: not present;CancerHotspot: no;3DHotspot: no	MutationAssessor: impact: medium, score: 2.53;SIFT: impact: tolerated_low_confidence, score: 0.09;Polyphen-2: impact: benign, score: 0	Missense_Mutation	diploid	1	.	.	.	6	26043861	26043861	G	C	0.08		4	49		32	13	2019-01-01	ENST00000357905.2:c.25C>G
Uterine Corpus Endometrial Carcinoma (TCGA, PanCancer Atlas)	TCGA-AJ-A3BG-01	Uterine Mixed Endometrial Carcinoma	R34H	OncoKB: NA;CIViC: NA;MyCancerGenome: not present;CancerHotspot: no;3DHotspot: no	MutationAssessor: impact: medium, score: 3.325;SIFT: impact: tolerated_low_confidence, score: 0.1;Polyphen-2: impact: benign, score: 0.001	Missense_Mutation	diploid		.	.	.	6	26043785	26043785	C	T	0.41	0.01	28	40	1	90	1276	2019-01-01	ENST00000357905.2:c.101G>A
Uterine Corpus Endometrial Carcinoma (TCGA, PanCancer Atlas)	TCGA-BG-A222-01	Uterine Endometrioid Carcinoma	V49A	OncoKB: NA;CIViC: NA;MyCancerGenome: not present;CancerHotspot: no;3DHotspot: no	MutationAssessor: impact: high, score: 4.09;SIFT: impact: deleterious_low_confidence, score: 0.01;Polyphen-2: impact: probably_damaging, score: 0.998	Missense_Mutation	diploid		.	.	.	6	26043740	26043740	A	G	0.41		30	44		89	4277	2019-01-01	ENST00000357905.2:c.146T>C
Glioblastoma Multiforme (TCGA, PanCancer Atlas)	TCGA-14-1795-01	Glioblastoma Multiforme	M60I	OncoKB: NA;CIViC: NA;MyCancerGenome: not present;CancerHotspot: no;3DHotspot: no	MutationAssessor: impact: medium, score: 3.43;SIFT: impact: deleterious_low_confidence, score: 0.02;Polyphen-2: impact: benign, score: 0.003	Missense_Mutation	diploid		.	.	.	6	26043706	26043706	C	G	0.62		428	267		384	343	2019-01-01	ENST00000357905.2:c.180G>C
Uterine Corpus Endometrial Carcinoma (TCGA, PanCancer Atlas)	TCGA-AP-A1DV-01	Uterine Endometrioid Carcinoma	R73C	OncoKB: NA;CIViC: NA;MyCancerGenome: not present;CancerHotspot: no;3DHotspot: no	MutationAssessor: impact: medium, score: 3.36;SIFT: impact: tolerated_low_confidence, score: 0.11;Polyphen-2: impact: benign, score: 0.002	Missense_Mutation	diploid	1	.	.	.	6	26043669	26043669	G	A	0.42		46	64		109	12071	2019-01-01	ENST00000357905.2:c.217C>T
Uterine Corpus Endometrial Carcinoma (TCGA, PanCancer Atlas)	TCGA-EO-A22R-01	Uterine Endometrioid Carcinoma	A75V	OncoKB: NA;CIViC: NA;MyCancerGenome: not present;CancerHotspot: no;3DHotspot: no	MutationAssessor: impact: medium, score: 2.805;SIFT: impact: deleterious_low_confidence, score: 0.01;Polyphen-2: impact: benign, score: 0.018	Missense_Mutation	diploid		.	.	.	6	26043662	26043662	G	A	0.41		50	71		141	12783	2019-01-01	ENST00000357905.2:c.224C>T
Uterine Corpus Endometrial Carcinoma (TCGA, PanCancer Atlas)	TCGA-A5-A0G2-01	Uterine Serous Carcinoma/Uterine Papillary Serous Carcinoma	R87C	OncoKB: NA;CIViC: NA;MyCancerGenome: not present;CancerHotspot: no;3DHotspot: no	MutationAssessor: impact: medium, score: 2.9;SIFT: impact: tolerated_low_confidence, score: 0.1;Polyphen-2: impact: benign, score: 0.007	Missense_Mutation	diploid		.	.	.	6	26043627	26043627	G	A	0.24		24	75		149	25730	2019-01-01	ENST00000357905.2:c.259C>T
MSS Mixed Solid Tumors (Broad/Dana-Farber, Nat Genet 2018)	PR4092_T	Melanoma	T91I	OncoKB: NA;CIViC: NA;MyCancerGenome: not present;CancerHotspot: no;3DHotspot: no	MutationAssessor: impact: medium, score: 3.445;SIFT: impact: deleterious_low_confidence, score: 0;Polyphen-2: impact: benign, score: 0.345	Missense_Mutation			NA	NA	NA	6	26043614	26043614	G	A	0.12		37	268			3486	2019-01-01	ENST00000357905.2:c.272C>T
Skin Cutaneous Melanoma (TCGA, PanCancer Atlas)	TCGA-D3-A2J6-06	Cutaneous Melanoma	G105V	OncoKB: NA;CIViC: NA;MyCancerGenome: not present;CancerHotspot: no;3DHotspot: no	MutationAssessor: impact: high, score: 4.33;SIFT: impact: deleterious_low_confidence, score: 0;Polyphen-2: impact: probably_damaging, score: 0.916	Missense_Mutation	shallowdel		.	.	.	6	26043572	26043572	C	A	0.12		3	23		77	1442	2019-01-01	ENST00000357905.2:c.314G>T
Cervical Squamous Cell Carcinoma (TCGA, PanCancer Atlas)	TCGA-C5-A2LY-01	Cervical Squamous Cell Carcinoma	A111V	OncoKB: NA;CIViC: NA;MyCancerGenome: not present;CancerHotspot: no;3DHotspot: no	MutationAssessor: impact: high, score: 4.375;SIFT: impact: deleterious_low_confidence, score: 0;Polyphen-2: impact: benign, score: 0.062	Missense_Mutation	gain		.	.	.	6	26043554	26043554	G	A	0.41		49	70		106	87	2019-01-01	ENST00000357905.2:c.332C>T
Breast Invasive Carcinoma (TCGA, PanCancer Atlas)	TCGA-A7-A0DA-01	Breast Invasive Ductal Carcinoma	K121N	OncoKB: NA;CIViC: NA;MyCancerGenome: not present;CancerHotspot: no;3DHotspot: no	MutationAssessor: impact: medium, score: 3.055;SIFT: impact: deleterious_low_confidence, score: 0;Polyphen-2: impact: benign, score: 0.011	Missense_Mutation	amp	1	.	.	.	6	26043523	26043523	C	G	0.2		37	145		80	148	2019-01-01	ENST00000357905.2:c.363G>C

## Sheet: HIST1H2BC
Study	Sample ID	Cancer Type	Protein Change	Annotation	Functional Impact	Mutation Type	Copy #	COSMIC	MS	VS	Center	Chromosome	Start Pos	End Pos	Ref	Var	Allele Freq (T)	Allele Freq (N)	Variant Reads	Ref Reads	Variant Reads (N)	Ref Reads (N)	# Mut in Sample
Hepatocellular Carcinomas (Inserm, Nat Genet 2015)	CHC1183T	Hepatocellular Carcinoma	P2S	OncoKB: NA;CIViC: NA;MyCancerGenome: not present;CancerHotspot: no;3DHotspot: no	MutationAssessor: Error;SIFT: impact: undefined, score: undefined;Polyphen-2: impact: undefined, score: undefined	Missense_Mutation			NA	NA	inserm.fr	6	26124129	26124129	G	A							68
Cervical Squamous Cell Carcinoma and Endocervical Adenocarcinoma (TCGA, Provisional)	TCGA-JW-A5VJ-01	Cervical Squamous Cell Carcinoma	E3Q	OncoKB: NA;CIViC: NA;MyCancerGenome: not present;CancerHotspot: no;3DHotspot: no	MutationAssessor: Error;SIFT: impact: undefined, score: undefined;Polyphen-2: impact: undefined, score: undefined	Missense_Mutation			Somatic	Untested	genome.wustl.edu	6	26124126	26124126	C	G				25		52	157
Prostate Adenocarcinoma (MSKCC/DFCI, Nature Genetics 2018)	TCGA-KC-A4BR-01	Prostate Adenocarcinoma	E3V	OncoKB: NA;CIViC: NA;MyCancerGenome: not present;CancerHotspot: no;3DHotspot: no	MutationAssessor: Error;SIFT: impact: deleterious_low_confidence, score: 0;Polyphen-2: impact: benign, score: 0.041	Missense_Mutation			NA	NA	broad.mit.edu	6	26216864	26216864	T	A			7	75			6
Mixed Tumors (PIP-Seq 2017)	PIP15-70532-T2	Anaplastic Ependymoma	P4L	OncoKB: NA;CIViC: NA;MyCancerGenome: not present;CancerHotspot: no;3DHotspot: no	MutationAssessor: Error;SIFT: impact: undefined, score: undefined;Polyphen-2: impact: undefined, score: undefined	Missense_Mutation		4	NA	NA	.	6	26124122	26124122	G	A							9129
Bladder Urothelial Carcinoma (BGI, Nat Genet 2013)	B89-12	Bladder Urothelial Carcinoma	P4Q	OncoKB: NA;CIViC: NA;MyCancerGenome: not present;CancerHotspot: no;3DHotspot: no	MutationAssessor: Error;SIFT: impact: undefined, score: undefined;Polyphen-2: impact: undefined, score: undefined	Missense_Mutation		4	NA	NA	BGI	6	26124122	26124122	G	T							192
Skin Cutaneous Melanoma (TCGA, Provisional)	TCGA-FR-A726-01	Lentigo Maligna Melanoma	A5T	OncoKB: NA;CIViC: NA;MyCancerGenome: not present;CancerHotspot: no;3DHotspot: no	MutationAssessor: Error;SIFT: impact: undefined, score: undefined;Polyphen-2: impact: undefined, score: undefined	Missense_Mutation		2	Somatic	NA	broad.mit.edu	6	26124120	26124120	C	T			8	229			6476
Ovarian Serous Cystadenocarcinoma (TCGA, Provisional)	TCGA-13-0723-01	Serous Ovarian Cancer	K6N	OncoKB: NA;CIViC: NA;MyCancerGenome: not present;CancerHotspot: no;3DHotspot: no	MutationAssessor: Error;SIFT: impact: undefined, score: undefined;Polyphen-2: impact: undefined, score: undefined	Missense_Mutation		2	Somatic	Valid	genome.wustl.edu	6	26124115	26124115	C	A							34
Thyroid Carcinoma (TCGA, Provisional)	TCGA-EL-A3GZ-01	Papillary Thyroid Cancer	S7C	OncoKB: NA;CIViC: NA;MyCancerGenome: not present;CancerHotspot: no;3DHotspot: no	MutationAssessor: Error;SIFT: impact: undefined, score: undefined;Polyphen-2: impact: undefined, score: undefined	Missense_Mutation		1	Somatic	NA	broad.mit.edu	6	26124113	26124113	G	C			54	77			10
TCGA data for Esophagus-Stomach Cancers (TCGA, Nature 2017)	TCGA-BR-8078-01	Stomach Adenocarcinoma	S7F	OncoKB: NA;CIViC: NA;MyCancerGenome: not present;CancerHotspot: no;3DHotspot: no	MutationAssessor: Error;SIFT: impact: undefined, score: undefined;Polyphen-2: impact: undefined, score: undefined	Missense_Mutation		1	Somatic	Untested	genome.wustl.edu	6	26124113	26124113	G	A			38	70		181	1674
Colorectal Adenocarcinoma (DFCI, Cell Reports 2016)	coadread_dfci_2016_112	Colorectal Adenocarcinoma	A8P	OncoKB: NA;CIViC: NA;MyCancerGenome: not present;CancerHotspot: no;3DHotspot: no	MutationAssessor: Error;SIFT: impact: undefined, score: undefined;Polyphen-2: impact: undefined, score: undefined	Missense_Mutation		1	NA	NA	dfci.harvard.edu	6	26124111	26124111	C	G							1083
Prostate Adenocarcinoma (MSKCC/DFCI, Nature Genetics 2018)	TCGA-KK-A6E5-01	Prostate Adenocarcinoma	P11S	OncoKB: NA;CIViC: NA;MyCancerGenome: not present;CancerHotspot: no;3DHotspot: no	MutationAssessor: impact: low, score: 1.81;SIFT: impact: undefined, score: undefined;Polyphen-2: impact: undefined, score: undefined	Missense_Mutation			NA	NA	broad.mit.edu	6	26199817	26199817	C	T			9	89			20
Colorectal Adenocarcinoma (DFCI, Cell Reports 2016)	coadread_dfci_2016_267922	Colorectal Adenocarcinoma	K16M	OncoKB: NA;CIViC: NA;MyCancerGenome: not present;CancerHotspot: no;3DHotspot: no	MutationAssessor: Error;SIFT: impact: undefined, score: undefined;Polyphen-2: impact: undefined, score: undefined	Missense_Mutation			NA	NA	dfci.harvard.edu	6	26124086	26124086	T	A							1223
Hepatocellular Carcinomas (Inserm, Nat Genet 2015)	CHC891T	Hepatocellular Carcinoma	A18V	OncoKB: NA;CIViC: NA;MyCancerGenome: not present;CancerHotspot: no;3DHotspot: no	MutationAssessor: Error;SIFT: impact: undefined, score: undefined;Polyphen-2: impact: undefined, score: undefined	Missense_Mutation			NA	NA	inserm.fr	6	26124080	26124080	G	A							55
Prostate Adenocarcinoma (MSKCC/DFCI, Nature Genetics 2018)	TCGA-HC-8216-01	Prostate Adenocarcinoma	V19M	OncoKB: NA;CIViC: NA;MyCancerGenome: not present;CancerHotspot: no;3DHotspot: no	MutationAssessor: Error;SIFT: impact: undefined, score: undefined;Polyphen-2: impact: undefined, score: undefined	Missense_Mutation			NA	NA	broad.mit.edu	6	26184078	26184078	G	A			4	150			102
Primary Central Nervous System Lymphoma (Mayo Clinic, Clin Cancer Res 2015)	PCNSL_3	Primary CNS Lymphoma	K25I	OncoKB: NA;CIViC: NA;MyCancerGenome: not present;CancerHotspot: no;3DHotspot: no	MutationAssessor: Error;SIFT: impact: undefined, score: undefined;Polyphen-2: impact: undefined, score: undefined	Missense_Mutation			NA	NA	Mayo Clinic	6	26124059	26124059	T	A							289
Colorectal Adenocarcinoma (DFCI, Cell Reports 2016)	coadread_dfci_2016_419	Colorectal Adenocarcinoma	K28R	OncoKB: NA;CIViC: NA;MyCancerGenome: not present;CancerHotspot: no;3DHotspot: no	MutationAssessor: Error;SIFT: impact: undefined, score: undefined;Polyphen-2: impact: undefined, score: undefined	Missense_Mutation			NA	NA	dfci.harvard.edu	6	26124050	26124050	T	C							159
TCGA data for Esophagus-Stomach Cancers (TCGA, Nature 2017)	TCGA-BR-A4IY-01	Stomach Adenocarcinoma	K31T	OncoKB: NA;CIViC: NA;MyCancerGenome: not present;CancerHotspot: no;3DHotspot: no	MutationAssessor: Error;SIFT: impact: undefined, score: undefined;Polyphen-2: impact: undefined, score: undefined	Missense_Mutation		1	Somatic	Untested	genome.wustl.edu	6	26124041	26124041	T	G			30	141		245	130
Bladder Urothelial Carcinoma (Dana Farber & MSKCC, Cancer Discov 2014)	MSKCC-0411_R	Bladder Urothelial Carcinoma	R32S	OncoKB: NA;CIViC: NA;MyCancerGenome: not present;CancerHotspot: no;3DHotspot: no	MutationAssessor: Error;SIFT: impact: undefined, score: undefined;Polyphen-2: impact: undefined, score: undefined	Missense_Mutation			NA	NA	NA	6	26124039	26124039	G	T							462
Medulloblastoma (Sickkids, Nature 2016)	MB-REC-29	Desmoplastic/Nodular Medulloblastoma	S33N	OncoKB: NA;CIViC: NA;MyCancerGenome: not present;CancerHotspot: no;3DHotspot: no	MutationAssessor: Error;SIFT: impact: undefined, score: undefined;Polyphen-2: impact: undefined, score: undefined	Missense_Mutation			NA	NA	The Hospital for Sick Children	6	26124035	26124035	C	T							25
Diffuse Large B-Cell Lymphoma (Broad, PNAS 2012)	DLBCL-Ls2328	Diffuse Large B-Cell Lymphoma	S37N	OncoKB: NA;CIViC: NA;MyCancerGenome: not present;CancerHotspot: no;3DHotspot: no	MutationAssessor: Error;SIFT: impact: undefined, score: undefined;Polyphen-2: impact: undefined, score: undefined	Missense_Mutation			NA	NA	broad.mit.edu	6	26124023	26124023	C	T							51
Cutaneous T Cell Lymphoma (Columbia U, Nat Genet 2015)	CTCL_NU7	Cutaneous T-Cell Lymphoma	Y38F	OncoKB: NA;CIViC: NA;MyCancerGenome: not present;CancerHotspot: no;3DHotspot: no	MutationAssessor: Error;SIFT: impact: undefined, score: undefined;Polyphen-2: impact: undefined, score: undefined	Missense_Mutation			NA	NA	www.columbia.edu	6	26124020	26124020	T	A							291
Breast Invasive Carcinoma (TCGA, Provisional)	TCGA-EW-A1OV-01	Breast Invasive Ductal Carcinoma	V45L	OncoKB: NA;CIViC: NA;MyCancerGenome: not present;CancerHotspot: no;3DHotspot: no	MutationAssessor: Error;SIFT: impact: undefined, score: undefined;Polyphen-2: impact: undefined, score: undefined	Missense_Mutation		1	Somatic	Untested	genome.wustl.edu	6	26124000	26124000	C	G			37	94			67
Colorectal Adenocarcinoma (DFCI, Cell Reports 2016)	coadread_dfci_2016_1791	Colorectal Adenocarcinoma	K47R	OncoKB: NA;CIViC: NA;MyCancerGenome: not present;CancerHotspot: no;3DHotspot: no	MutationAssessor: Error;SIFT: impact: undefined, score: undefined;Polyphen-2: impact: undefined, score: undefined	Missense_Mutation			NA	NA	dfci.harvard.edu	6	26123993	26123993	T	C							1137
Diffuse Large B-cell Lymphoma (BCGSC, Blood 2013)	MD903	Activated B-cell Type	K47R	OncoKB: NA;CIViC: NA;MyCancerGenome: not present;CancerHotspot: no;3DHotspot: no	MutationAssessor: Error;SIFT: impact: undefined, score: undefined;Polyphen-2: impact: undefined, score: undefined	Missense_Mutation			NA	NA	NA	6	26123993	26123993	T	C							664
Prostate Adenocarcinoma (MSKCC/DFCI, Nature Genetics 2018)	12729	Prostate Adenocarcinoma	Q48R	OncoKB: NA;CIViC: NA;MyCancerGenome: not present;CancerHotspot: no;3DHotspot: no	MutationAssessor: Error;SIFT: impact: undefined, score: undefined;Polyphen-2: impact: undefined, score: undefined	Missense_Mutation			NA	NA	broad.mit.edu	6	26273346	26273346	A	G			67	206			1282
Bladder Cancer (TCGA, Cell 2017)	TCGA-ZF-AA51-01	Bladder Urothelial Carcinoma	I55V	OncoKB: NA;CIViC: NA;MyCancerGenome: not present;CancerHotspot: no;3DHotspot: no	MutationAssessor: Error;SIFT: impact: undefined, score: undefined;Polyphen-2: impact: undefined, score: undefined	Missense_Mutation			Somatic	NaN	broad.mit.edu	6	26123970	26123970	T	C				124			619
Pan-Lung Cancer (TCGA, Nat Genet 2016)	TCGA-55-A490-01	Lung Adenocarcinoma	S57F	OncoKB: NA;CIViC: NA;MyCancerGenome: not present;CancerHotspot: no;3DHotspot: no	MutationAssessor: Error;SIFT: impact: undefined, score: undefined;Polyphen-2: impact: undefined, score: undefined	Missense_Mutation			Somatic	NA	broad.mit.edu	6	26123963	26123963	G	A			87	192		250	1145
Pan-Lung Cancer (TCGA, Nat Genet 2016)	TCGA-MN-A4N4-01	Lung Adenocarcinoma	S57T	OncoKB: NA;CIViC: NA;MyCancerGenome: not present;CancerHotspot: no;3DHotspot: no	MutationAssessor: Error;SIFT: impact: undefined, score: undefined;Polyphen-2: impact: undefined, score: undefined	Missense_Mutation			Somatic	NA	broad.mit.edu	6	26123964	26123964	A	T			76	177		289	1308
Non-Hodgkin Lymphoma (BCGSC, Nature 2011)	DLBCL-PatientG	Germinal Center B-Cell Type	G61D	OncoKB: NA;CIViC: NA;MyCancerGenome: not present;CancerHotspot: no;3DHotspot: no	MutationAssessor: Error;SIFT: impact: undefined, score: undefined;Polyphen-2: impact: undefined, score: undefined	Missense_Mutation		1	Somatic	Valid	NA	6	26123951	26123951	C	T							53
Diffuse Large B-cell Lymphoma (BCGSC, Blood 2013)	RG083	Germinal Center B-Cell Type	G61D	OncoKB: NA;CIViC: NA;MyCancerGenome: not present;CancerHotspot: no;3DHotspot: no	MutationAssessor: Error;SIFT: impact: undefined, score: undefined;Polyphen-2: impact: undefined, score: undefined	Missense_Mutation		1	somatic	NA	NA	6	26123951	26123951	C	T							49
Liver Hepatocellular Carcinoma (TCGA, Provisional)	TCGA-CC-A9FW-01	Hepatocellular Carcinoma	G61V	OncoKB: NA;CIViC: NA;MyCancerGenome: not present;CancerHotspot: no;3DHotspot: no	MutationAssessor: Error;SIFT: impact: undefined, score: undefined;Polyphen-2: impact: undefined, score: undefined	Missense_Mutation		1	Somatic	Untested	hgsc.bcm.edu	6	26123951	26123951	C	A			49	49		104	105
Pan-Lung Cancer (TCGA, Nat Genet 2016)	TCGA-21-1079-01	Lung Squamous Cell Carcinoma	I62M	OncoKB: NA;CIViC: NA;MyCancerGenome: not present;CancerHotspot: no;3DHotspot: no	MutationAssessor: Error;SIFT: impact: undefined, score: undefined;Polyphen-2: impact: undefined, score: undefined	Missense_Mutation			Somatic	NA	broad.mit.edu	6	26123947	26123947	G	C			120	395		776	1303
Metastatic Prostate Cancer, SU2C/PCF Dream Team (Robinson et al., Cell 2015)	6115234	Prostate Adenocarcinoma	N64S	OncoKB: NA;CIViC: NA;MyCancerGenome: not present;CancerHotspot: no;3DHotspot: no	MutationAssessor: Error;SIFT: impact: undefined, score: undefined;Polyphen-2: impact: undefined, score: undefined	Missense_Mutation			NA	NA	NA	6	26123942	26123942	T	C				270			62
Prostate Adenocarcinoma (MSKCC/DFCI, Nature Genetics 2018)	PROS01448-6115234-SM-67ERX	Prostate Adenocarcinoma	N64S	OncoKB: NA;CIViC: NA;MyCancerGenome: not present;CancerHotspot: no;3DHotspot: no	MutationAssessor: Error;SIFT: impact: undefined, score: undefined;Polyphen-2: impact: undefined, score: undefined	Missense_Mutation			NA	NA	broad.mit.edu	6	26123942	26123942	T	C			126	270			46
Skin Cutaneous Melanoma (TCGA, Provisional)	TCGA-D3-A1QA-06	Cutaneous Melanoma	S65F	OncoKB: NA;CIViC: NA;MyCancerGenome: not present;CancerHotspot: no;3DHotspot: no	MutationAssessor: Error;SIFT: impact: undefined, score: undefined;Polyphen-2: impact: undefined, score: undefined	Missense_Mutation		4	Somatic	NA	broad.mit.edu	6	26123939	26123939	G	A			56	190			350
Stomach Adenocarcinoma (U Tokyo, Nat Genet 2014)	GC_353T-GC_353N	Stomach Adenocarcinoma	S65Y	OncoKB: NA;CIViC: NA;MyCancerGenome: not present;CancerHotspot: no;3DHotspot: no	MutationAssessor: Error;SIFT: impact: undefined, score: undefined;Polyphen-2: impact: undefined, score: undefined	Missense_Mutation		4	NA	NA	UTokyo	6	26123939	26123939	G	T				102			146
Colorectal Adenocarcinoma (TCGA, Provisional)	TCGA-AA-A010-01	Colon Adenocarcinoma	S65Y	OncoKB: NA;CIViC: NA;MyCancerGenome: not present;CancerHotspot: no;3DHotspot: no	MutationAssessor: Error;SIFT: impact: undefined, score: undefined;Polyphen-2: impact: undefined, score: undefined	Missense_Mutation		4	Somatic	Valid	broad.mit.edu	6	26123939	26123939	G	T							6561
Uterine Corpus Endometrial Carcinoma (TCGA, Provisional)	TCGA-AX-A05Z-01	Uterine Endometrioid Carcinoma	S65Y	OncoKB: NA;CIViC: NA;MyCancerGenome: not present;CancerHotspot: no;3DHotspot: no	MutationAssessor: Error;SIFT: impact: undefined, score: undefined;Polyphen-2: impact: undefined, score: undefined	Missense_Mutation		4	Somatic	Untested	genome.wustl.edu	6	26123939	26123939	G	T			58	190		312	5704
Colon Adenocarcinoma (TCGA, PanCancer Atlas)	TCGA-AA-3510-01	Colon Adenocarcinoma	S65Y	OncoKB: NA;CIViC: NA;MyCancerGenome: not present;CancerHotspot: no;3DHotspot: no	MutationAssessor: Error;SIFT: impact: undefined, score: undefined;Polyphen-2: impact: undefined, score: undefined	Missense_Mutation		4	.	.	.	6	26123939	26123939	G	T			32	57		58	3073
Pheochromocytoma and Paraganglioma (TCGA, PanCancer Atlas)	TCGA-W2-A7HB-01	Pheochromocytoma	S65Y	OncoKB: NA;CIViC: NA;MyCancerGenome: not present;CancerHotspot: no;3DHotspot: no	MutationAssessor: Error;SIFT: impact: undefined, score: undefined;Polyphen-2: impact: undefined, score: undefined	Missense_Mutation		4	.	.	.	6	26123939	26123939	G	T			51	122		177	9
Kidney Renal Papillary Cell Carcinoma (TCGA, Provisional)	TCGA-BQ-7049-01	Papillary Renal Cell Carcinoma	F66C	OncoKB: NA;CIViC: NA;MyCancerGenome: not present;CancerHotspot: no;3DHotspot: no	MutationAssessor: Error;SIFT: impact: undefined, score: undefined;Polyphen-2: impact: undefined, score: undefined	Missense_Mutation		1	Somatic	Untested	hgsc.bcm.edu	6	26123936	26123936	A	C			15	211		279	18
Hepatocellular Carcinomas (Inserm, Nat Genet 2015)	BCM723T	Hepatocellular Carcinoma	I70V	OncoKB: NA;CIViC: NA;MyCancerGenome: not present;CancerHotspot: no;3DHotspot: no	MutationAssessor: Error;SIFT: impact: undefined, score: undefined;Polyphen-2: impact: undefined, score: undefined	Missense_Mutation		1	NA	NA	inserm.fr	6	26123925	26123925	T	C							497
Pan-Lung Cancer (TCGA, Nat Genet 2016)	TCGA-78-7147-01	Lung Adenocarcinoma	F71L	OncoKB: NA;CIViC: NA;MyCancerGenome: not present;CancerHotspot: no;3DHotspot: yes	MutationAssessor: Error;SIFT: impact: undefined, score: undefined;Polyphen-2: impact: undefined, score: undefined	Missense_Mutation		1	Somatic	NA	broad.mit.edu	6	26123920	26123920	A	C			70	100		202	283
Skin Cutaneous Melanoma(Broad, Cancer Discov 2014)	Pat_40_Post	Melanoma	E72K	OncoKB: NA;CIViC: NA;MyCancerGenome: not present;CancerHotspot: no;3DHotspot: yes	MutationAssessor: Error;SIFT: impact: undefined, score: undefined;Polyphen-2: impact: undefined, score: undefined	Missense_Mutation		3	NA	NA	broad.mit.edu	6	26123919	26123919	C	T			219	313			860
Skin Cutaneous Melanoma(Broad, Cancer Discov 2014)	Pat_40_Pre	Melanoma	E72K	OncoKB: NA;CIViC: NA;MyCancerGenome: not present;CancerHotspot: no;3DHotspot: yes	MutationAssessor: Error;SIFT: impact: undefined, score: undefined;Polyphen-2: impact: undefined, score: undefined	Missense_Mutation		3	NA	NA	broad.mit.edu	6	26123919	26123919	C	T			28	132			791
Pan-Lung Cancer (TCGA, Nat Genet 2016)	TCGA-85-8072-01	Lung Squamous Cell Carcinoma	E72Q	OncoKB: NA;CIViC: NA;MyCancerGenome: not present;CancerHotspot: no;3DHotspot: yes	MutationAssessor: Error;SIFT: impact: undefined, score: undefined;Polyphen-2: impact: undefined, score: undefined	Missense_Mutation		3	Somatic	NA	broad.mit.edu	6	26123919	26123919	C	G			5	139		173	169
Bladder Urothelial Carcinoma (BGI, Nat Genet 2013)	B105-0	Bladder Urothelial Carcinoma	E72Q	OncoKB: NA;CIViC: NA;MyCancerGenome: not present;CancerHotspot: no;3DHotspot: yes	MutationAssessor: Error;SIFT: impact: undefined, score: undefined;Polyphen-2: impact: undefined, score: undefined	Missense_Mutation		3	NA	NA	BGI	6	26123919	26123919	C	G							205
Mutational profiles of metastatic breast cancer (France, 2016)	MBC_1	Invasive Breast Carcinoma	E72Q	OncoKB: NA;CIViC: NA;MyCancerGenome: not present;CancerHotspot: no;3DHotspot: yes	MutationAssessor: Error;SIFT: impact: undefined, score: undefined;Polyphen-2: impact: undefined, score: undefined	Missense_Mutation		3	Somatic	NA	GR	6	26123919	26123919	C	G			20	92		85	55
Breast Invasive Carcinoma (TCGA, Provisional)	TCGA-GM-A2DI-01	Breast Invasive Ductal Carcinoma	E72Q	OncoKB: NA;CIViC: NA;MyCancerGenome: not present;CancerHotspot: no;3DHotspot: yes	MutationAssessor: Error;SIFT: impact: undefined, score: undefined;Polyphen-2: impact: undefined, score: undefined	Missense_Mutation		3	Somatic	Untested	genome.wustl.edu	6	26123919	26123919	C	G			9	81			20
Lymphoid Neoplasm Diffuse Large B-cell Lymphoma (TCGA, Provisional)	TCGA-FF-A7CQ-01	Diffuse Large B-Cell Lymphoma	R73H	OncoKB: NA;CIViC: NA;MyCancerGenome: not present;CancerHotspot: no;3DHotspot: no	MutationAssessor: Error;SIFT: impact: undefined, score: undefined;Polyphen-2: impact: undefined, score: undefined	Missense_Mutation			Somatic	Untested	hgsc.bcm.edu	6	26123915	26123915	C	T			11	98		126	105
Cervical Squamous Cell Carcinoma and Endocervical Adenocarcinoma (TCGA, Provisional)	TCGA-C5-A3HE-01	Cervical Squamous Cell Carcinoma	I74M	OncoKB: NA;CIViC: NA;MyCancerGenome: not present;CancerHotspot: no;3DHotspot: yes	MutationAssessor: Error;SIFT: impact: undefined, score: undefined;Polyphen-2: impact: undefined, score: undefined	Missense_Mutation			Somatic	Untested	genome.wustl.edu	6	26123911	26123911	G	C				119		182	301
Pan-Lung Cancer (TCGA, Nat Genet 2016)	TCGA-33-6738-01	Lung Squamous Cell Carcinoma	E77K	OncoKB: NA;CIViC: NA;MyCancerGenome: not present;CancerHotspot: no;3DHotspot: yes	MutationAssessor: Error;SIFT: impact: undefined, score: undefined;Polyphen-2: impact: undefined, score: undefined	Missense_Mutation			Somatic	NA	broad.mit.edu	6	26123904	26123904	C	T			34	144		171	300
Bladder Urothelial Carcinoma (Dana Farber & MSKCC, Cancer Discov 2014)	MSKCC-0296_R	Bladder Urothelial Carcinoma	E77K	OncoKB: NA;CIViC: NA;MyCancerGenome: not present;CancerHotspot: no;3DHotspot: yes	MutationAssessor: Error;SIFT: impact: undefined, score: undefined;Polyphen-2: impact: undefined, score: undefined	Missense_Mutation			NA	NA	NA	6	26123904	26123904	C	T							842
Bladder Cancer (TCGA, Cell 2017)	TCGA-DK-A6B6-01	Bladder Urothelial Carcinoma	E77K	OncoKB: NA;CIViC: NA;MyCancerGenome: not present;CancerHotspot: no;3DHotspot: yes	MutationAssessor: Error;SIFT: impact: undefined, score: undefined;Polyphen-2: impact: undefined, score: undefined	Missense_Mutation			Somatic	NaN	broad.mit.edu	6	26123904	26123904	C	T				126			780
Bladder Cancer (TCGA, Cell 2017)	TCGA-ZF-A9R7-01	Bladder Urothelial Carcinoma	E77K	OncoKB: NA;CIViC: NA;MyCancerGenome: not present;CancerHotspot: no;3DHotspot: yes	MutationAssessor: Error;SIFT: impact: undefined, score: undefined;Polyphen-2: impact: undefined, score: undefined	Missense_Mutation			Somatic	NaN	broad.mit.edu	6	26123904	26123904	C	T				102			631
Cervical Squamous Cell Carcinoma and Endocervical Adenocarcinoma (TCGA, Provisional)	TCGA-IR-A3LA-01	Cervical Endometrioid Carcinoma	E77K	OncoKB: NA;CIViC: NA;MyCancerGenome: not present;CancerHotspot: no;3DHotspot: yes	MutationAssessor: Error;SIFT: impact: undefined, score: undefined;Polyphen-2: impact: undefined, score: undefined	Missense_Mutation			Somatic	Untested	genome.wustl.edu	6	26123904	26123904	C	T				86		134	911
Pan-Lung Cancer (TCGA, Nat Genet 2016)	TCGA-77-A5GB-01	Lung Squamous Cell Carcinoma	E77Q	OncoKB: NA;CIViC: NA;MyCancerGenome: not present;CancerHotspot: no;3DHotspot: yes	MutationAssessor: Error;SIFT: impact: undefined, score: undefined;Polyphen-2: impact: undefined, score: undefined	Missense_Mutation			Somatic	NA	broad.mit.edu	6	26123904	26123904	C	G			36	202		189	106
Colon Adenocarcinoma (TCGA, PanCancer Atlas)	TCGA-A6-5665-01	Colon Adenocarcinoma	A78V	OncoKB: NA;CIViC: NA;MyCancerGenome: not present;CancerHotspot: no;3DHotspot: yes	MutationAssessor: Error;SIFT: impact: undefined, score: undefined;Polyphen-2: impact: undefined, score: undefined	Missense_Mutation		1	.	.	.	6	26123900	26123900	G	A			31	63		229	1858
Breast Invasive Carcinoma (Sanger, Nature 2012)	PD4601a	Invasive Breast Carcinoma	S79F	OncoKB: NA;CIViC: NA;MyCancerGenome: not present;CancerHotspot: no;3DHotspot: yes	MutationAssessor: Error;SIFT: impact: undefined, score: undefined;Polyphen-2: impact: undefined, score: undefined	Missense_Mutation		1	Unknown	Unknown	Sanger	6	26123897	26123897	G	A							157
Skin Cutaneous Melanoma (Broad, Cell 2012)	MEL-JWCI-WGS-34	Cutaneous Melanoma	S79F	OncoKB: NA;CIViC: NA;MyCancerGenome: not present;CancerHotspot: no;3DHotspot: yes		Missense_Mutation		1	NA	NA	broad.mit.edu	6	26123896	26123897	GG	AA							1009
Prostate Adenocarcinoma (MSKCC/DFCI, Nature Genetics 2018)	AAPC-STID0000021537-Tumor-SM-3RVW7	Prostate Adenocarcinoma	A82V	OncoKB: NA;CIViC: NA;MyCancerGenome: not present;CancerHotspot: no;3DHotspot: no	MutationAssessor: impact: medium, score: 2.355;SIFT: impact: undefined, score: undefined;Polyphen-2: impact: undefined, score: undefined	Missense_Mutation			NA	NA	broad.mit.edu	6	26200031	26200031	C	T			49	323			14
Diffuse Large B-Cell Lymphoma (Broad, PNAS 2012)	DLBCL-MAYO_DLBCL_234	Diffuse Large B-Cell Lymphoma	N85S	OncoKB: NA;CIViC: NA;MyCancerGenome: not present;CancerHotspot: no;3DHotspot: no	MutationAssessor: Error;SIFT: impact: undefined, score: undefined;Polyphen-2: impact: undefined, score: undefined	Missense_Mutation			NA	NA	broad.mit.edu	6	26123879	26123879	T	C							3894
Chronic Lymphocytic Leukemia (IUOPA, Nature 2015)	cll_iuopa_2015_141	Chronic Lymphocytic Leukemia	N85S	OncoKB: NA;CIViC: NA;MyCancerGenome: not present;CancerHotspot: no;3DHotspot: no	MutationAssessor: Error;SIFT: impact: undefined, score: undefined;Polyphen-2: impact: undefined, score: undefined	Missense_Mutation			NA	NA	www.unioviedo.es/IUOPA/	6	26123879	26123879	T	C							29
Prostate Adenocarcinoma (MSKCC/DFCI, Nature Genetics 2018)	PROS12319B-SU2C-06115116-SM-4W2NB	Prostate Adenocarcinoma	R87P	OncoKB: NA;CIViC: NA;MyCancerGenome: not present;CancerHotspot: no;3DHotspot: no	MutationAssessor: Error;SIFT: impact: undefined, score: undefined;Polyphen-2: impact: undefined, score: undefined	Missense_Mutation			NA	NA	broad.mit.edu	6	26273463	26273463	G	C			91	464			68
Prostate Adenocarcinoma (Fred Hutchinson CRC, Nat Med 2016)	05-123E2_LN	Prostate Adenocarcinoma	T89A	OncoKB: NA;CIViC: NA;MyCancerGenome: not present;CancerHotspot: no;3DHotspot: no	MutationAssessor: Error;SIFT: impact: undefined, score: undefined;Polyphen-2: impact: undefined, score: undefined	Missense_Mutation			NA	NA	fhcrc	6	26123868	26123868	T	C				183			1026
Head and Neck Squamous Cell Carcinoma (TCGA, Provisional)	TCGA-UF-A7JD-01	Head and Neck Squamous Cell Carcinoma	T89S	OncoKB: NA;CIViC: NA;MyCancerGenome: not present;CancerHotspot: no;3DHotspot: no	MutationAssessor: Error;SIFT: impact: undefined, score: undefined;Polyphen-2: impact: undefined, score: undefined	Missense_Mutation			Somatic	NA	broad.mit.edu	6	26123867	26123867	G	C			103	136			111
Small Cell Lung Cancer (Johns Hopkins, Nat Genet 2012)	134417	Small Cell Lung Cancer	I90V	OncoKB: NA;CIViC: NA;MyCancerGenome: not present;CancerHotspot: no;3DHotspot: no	MutationAssessor: Error;SIFT: impact: undefined, score: undefined;Polyphen-2: impact: undefined, score: undefined	Missense_Mutation		1	NA	NA	JHU	6	26123865	26123865	T	C							102
Pan-Lung Cancer (TCGA, Nat Genet 2016)	TCGA-85-7698-01	Lung Squamous Cell Carcinoma	R93G	OncoKB: NA;CIViC: NA;MyCancerGenome: not present;CancerHotspot: no;3DHotspot: no	MutationAssessor: Error;SIFT: impact: undefined, score: undefined;Polyphen-2: impact: undefined, score: undefined	Missense_Mutation			Somatic	NA	broad.mit.edu	6	26123856	26123856	T	C			25	71		159	119
Pan-Lung Cancer (TCGA, Nat Genet 2016)	TCGA-MN-A4N5-01	Lung Adenocarcinoma	R93I	OncoKB: NA;CIViC: NA;MyCancerGenome: not present;CancerHotspot: no;3DHotspot: no		Missense_Mutation			Somatic	NA	broad.mit.edu	6	26123854	26123855	CC	AA			29	130		200	380
Pan-Lung Cancer (TCGA, Nat Genet 2016)	TCGA-66-2767-01	Lung Squamous Cell Carcinoma	E94D	OncoKB: NA;CIViC: NA;MyCancerGenome: not present;CancerHotspot: no;3DHotspot: no	MutationAssessor: Error;SIFT: impact: undefined, score: undefined;Polyphen-2: impact: undefined, score: undefined	Missense_Mutation		1	Somatic	NA	broad.mit.edu	6	26123851	26123851	C	A			49	108		146	301
Metastatic Prostate Cancer, SU2C/PCF Dream Team (Robinson et al., Cell 2015)	SC_9081	Prostate Adenocarcinoma	I95N	OncoKB: NA;CIViC: NA;MyCancerGenome: not present;CancerHotspot: no;3DHotspot: no	MutationAssessor: Error;SIFT: impact: undefined, score: undefined;Polyphen-2: impact: undefined, score: undefined	Missense_Mutation			NA	NA	NA	6	26123849	26123849	A	T				307			702
Diffuse Large B-cell Lymphoma (BCGSC, Blood 2013)	OCI-Ly3	Activated B-cell Type	L103F	OncoKB: NA;CIViC: NA;MyCancerGenome: not present;CancerHotspot: no;3DHotspot: yes	MutationAssessor: Error;SIFT: impact: undefined, score: undefined;Polyphen-2: impact: undefined, score: undefined	Missense_Mutation		1	valid	NA	NA	6	26123826	26123826	G	A							446
Diffuse Large B-Cell Lymphoma (Broad, PNAS 2012)	DLBCL-Ls378	Diffuse Large B-Cell Lymphoma	L103I	OncoKB: NA;CIViC: NA;MyCancerGenome: not present;CancerHotspot: no;3DHotspot: yes	MutationAssessor: Error;SIFT: impact: undefined, score: undefined;Polyphen-2: impact: undefined, score: undefined	Missense_Mutation		1	NA	NA	broad.mit.edu	6	26123826	26123826	G	T							71
Breast Invasive Carcinoma (TCGA, Provisional)	TCGA-BH-A0BZ-01	Breast Invasive Ductal Carcinoma	L103P	OncoKB: NA;CIViC: NA;MyCancerGenome: not present;CancerHotspot: no;3DHotspot: yes	MutationAssessor: Error;SIFT: impact: undefined, score: undefined;Polyphen-2: impact: undefined, score: undefined	Missense_Mutation		1	Somatic	Untested	genome.wustl.edu	6	26123825	26123825	A	G			43	291			174
Bladder Urothelial Carcinoma (BGI, Nat Genet 2013)	B71	Bladder Urothelial Carcinoma	P104S	OncoKB: NA;CIViC: NA;MyCancerGenome: not present;CancerHotspot: no;3DHotspot: no	MutationAssessor: Error;SIFT: impact: undefined, score: undefined;Polyphen-2: impact: undefined, score: undefined	Missense_Mutation		2	NA	NA	BGI	6	26123823	26123823	G	A							92
Colon Adenocarcinoma (TCGA, PanCancer Atlas)	TCGA-AA-A02O-01	Colon Adenocarcinoma	P104S	OncoKB: NA;CIViC: NA;MyCancerGenome: not present;CancerHotspot: no;3DHotspot: no	MutationAssessor: Error;SIFT: impact: undefined, score: undefined;Polyphen-2: impact: undefined, score: undefined	Missense_Mutation		2	.	.	.	6	26123823	26123823	G	A			7	98		96	160
Prostate Adenocarcinoma (MSKCC/DFCI, Nature Genetics 2018)	SC_9151	Prostate Adenocarcinoma	E106Q	OncoKB: NA;CIViC: NA;MyCancerGenome: not present;CancerHotspot: no;3DHotspot: no	MutationAssessor: Error;SIFT: impact: undefined, score: undefined;Polyphen-2: impact: undefined, score: undefined	Missense_Mutation			NA	NA	broad.mit.edu	6	26123817	26123817	C	G			4	331			103
Colorectal Adenocarcinoma (DFCI, Cell Reports 2016)	coadread_dfci_2016_3671	Colorectal Adenocarcinoma	E106Q	OncoKB: NA;CIViC: NA;MyCancerGenome: not present;CancerHotspot: no;3DHotspot: no	MutationAssessor: Error;SIFT: impact: undefined, score: undefined;Polyphen-2: impact: undefined, score: undefined	Missense_Mutation			NA	NA	dfci.harvard.edu	6	26123817	26123817	C	G							81
Colon Adenocarcinoma (TCGA, PanCancer Atlas)	TCGA-WS-AB45-01	Mucinous Adenocarcinoma of the Colon and Rectum	A108V	OncoKB: NA;CIViC: NA;MyCancerGenome: not present;CancerHotspot: no;3DHotspot: no	MutationAssessor: Error;SIFT: impact: undefined, score: undefined;Polyphen-2: impact: undefined, score: undefined	Missense_Mutation			.	.	.	6	26123810	26123810	G	A			13	65		129	2524
Pan-Lung Cancer (TCGA, Nat Genet 2016)	TCGA-55-1592-01	Lung Adenocarcinoma	A111P	OncoKB: NA;CIViC: NA;MyCancerGenome: not present;CancerHotspot: no;3DHotspot: no	MutationAssessor: Error;SIFT: impact: undefined, score: undefined;Polyphen-2: impact: undefined, score: undefined	Missense_Mutation		1	Somatic	NA	broad.mit.edu	6	26123802	26123802	C	G			14	170		190	473
Breast Invasive Carcinoma (TCGA, Provisional)	TCGA-BH-A0BV-01	Breast Invasive Ductal Carcinoma	E114K	OncoKB: NA;CIViC: NA;MyCancerGenome: not present;CancerHotspot: no;3DHotspot: no	MutationAssessor: Error;SIFT: impact: undefined, score: undefined;Polyphen-2: impact: undefined, score: undefined	Missense_Mutation		2	Somatic	Untested	genome.wustl.edu	6	26123793	26123793	C	T			26	139			27
Pan-Lung Cancer (TCGA, Nat Genet 2016)	TCGA-05-5715-01	Lung Adenocarcinoma	E114Q	OncoKB: NA;CIViC: NA;MyCancerGenome: not present;CancerHotspot: no;3DHotspot: no	MutationAssessor: Error;SIFT: impact: undefined, score: undefined;Polyphen-2: impact: undefined, score: undefined	Missense_Mutation		2	Somatic	NA	broad.mit.edu	6	26123793	26123793	C	G			21	49		82	104
Diffuse Large B-cell Lymphoma (BCGSC, Blood 2013)	NU-DUL-1	Activated B-cell Type	T120I	OncoKB: NA;CIViC: NA;MyCancerGenome: not present;CancerHotspot: no;3DHotspot: no	MutationAssessor: Error;SIFT: impact: undefined, score: undefined;Polyphen-2: impact: undefined, score: undefined	Missense_Mutation			valid	NA	NA	6	26123774	26123774	G	A							418
Colorectal Adenocarcinoma (DFCI, Cell Reports 2016)	coadread_dfci_2016_102	Colorectal Adenocarcinoma	Y122C	OncoKB: NA;CIViC: NA;MyCancerGenome: not present;CancerHotspot: no;3DHotspot: no	MutationAssessor: Error;SIFT: impact: undefined, score: undefined;Polyphen-2: impact: undefined, score: undefined	Missense_Mutation			NA	NA	dfci.harvard.edu	6	26123768	26123768	T	C							1333
TCGA data for Esophagus-Stomach Cancers (TCGA, Nature 2017)	TCGA-BR-8487-01	Stomach Adenocarcinoma	T123A	OncoKB: NA;CIViC: NA;MyCancerGenome: not present;CancerHotspot: no;3DHotspot: no	MutationAssessor: Error;SIFT: impact: undefined, score: undefined;Polyphen-2: impact: undefined, score: undefined	Missense_Mutation		1	Somatic	Untested	genome.wustl.edu	6	26123766	26123766	T	C			35	76		128	2994
Breast Invasive Carcinoma (TCGA, Provisional)	TCGA-E2-A159-01	Breast Invasive Ductal Carcinoma	S125F	OncoKB: NA;CIViC: NA;MyCancerGenome: not present;CancerHotspot: no;3DHotspot: no	MutationAssessor: Error;SIFT: impact: undefined, score: undefined;Polyphen-2: impact: undefined, score: undefined	Missense_Mutation		1	Somatic	Untested	genome.wustl.edu	6	26123759	26123759	G	A			80	282			104
Diffuse Large B-Cell Lymphoma (Duke, Cell 2017)	DLBCL_DUKE_2999	Diffuse Large B-Cell Lymphoma, NOS	E3K	OncoKB: Unknown, level NA;CIViC: NA;MyCancerGenome: not present;CancerHotspot: no;3DHotspot: no	MutationAssessor: Error;SIFT: impact: undefined, score: undefined;Polyphen-2: impact: undefined, score: undefined	Missense_Mutation			NA	NA	Duke University	6	26124126	26124126	C	T							8	2019-01-02	ENST00000314332.5:c.7G>A
Brain Lower Grade Glioma (TCGA, PanCancer Atlas)	TCGA-DU-A6S8-01	Oligodendroglioma	P4L	OncoKB: Unknown, level NA;CIViC: NA;MyCancerGenome: not present;CancerHotspot: no;3DHotspot: no	MutationAssessor: Error;SIFT: impact: undefined, score: undefined;Polyphen-2: impact: undefined, score: undefined	Missense_Mutation	diploid	4	.	.	.	6	26124122	26124122	G	A	0.07		8	109		83	53	2019-01-02	ENST00000314332.5:c.11C>T
Breast Cancer (METABRIC, Nature 2012 & Nat Commun 2016)	MB-4328	Breast Invasive Ductal Carcinoma	S7C	OncoKB: Unknown, level NA;CIViC: NA;MyCancerGenome: not present;CancerHotspot: no;3DHotspot: no	MutationAssessor: Error;SIFT: impact: undefined, score: undefined;Polyphen-2: impact: undefined, score: undefined	Missense_Mutation	diploid	1	NA	NA	METABRIC	6	26124113	26124113	G	C							5	2019-01-02	ENST00000314332.5:c.20C>G
Diffuse Large B cell Lymphoma (DFCI, Nat Med 2018)	DLBCL-LS3271	Activated B-cell Type	A10T	OncoKB: Unknown, level NA;CIViC: NA;MyCancerGenome: not present;CancerHotspot: no;3DHotspot: no	MutationAssessor: Error;SIFT: impact: undefined, score: undefined;Polyphen-2: impact: undefined, score: undefined	Missense_Mutation			NA	NA	broad.mit.edu	6	26124105	26124105	C	T	0.06		8	128			156	2019-01-02	ENST00000314332.5:c.28G>A
Ovarian Serous Cystadenocarcinoma (TCGA, PanCancer Atlas)	TCGA-13-0885-01	Serous Ovarian Cancer	G14S	OncoKB: Unknown, level NA;CIViC: NA;MyCancerGenome: not present;CancerHotspot: no;3DHotspot: no	MutationAssessor: Error;SIFT: impact: undefined, score: undefined;Polyphen-2: impact: undefined, score: undefined	Missense_Mutation	gain		.	.	.	6	26124093	26124093	C	T	0.04		12	266		227	181	2019-01-02	ENST00000314332.5:c.40G>A
Colorectal Adenocarcinoma (DFCI, Cell Reports 2016)	coadread_dfci_2016_267922	Colorectal Adenocarcinoma	K16N	OncoKB: Unknown, level NA;CIViC: NA;MyCancerGenome: not present;CancerHotspot: no;3DHotspot: no	MutationAssessor: Error;SIFT: impact: undefined, score: undefined;Polyphen-2: impact: undefined, score: undefined	Missense_Mutation			NA	NA	dfci.harvard.edu	6	26124085	26124085	C	A							1350	2019-01-02	ENST00000314332.5:c.48G>T
Breast Cancer (METABRIC, Nature 2012 & Nat Commun 2016)	MB-2846	Breast Invasive Ductal Carcinoma	A18T	OncoKB: Unknown, level NA;CIViC: NA;MyCancerGenome: not present;CancerHotspot: no;3DHotspot: no	MutationAssessor: Error;SIFT: impact: undefined, score: undefined;Polyphen-2: impact: undefined, score: undefined	Missense_Mutation	diploid		NA	NA	METABRIC	6	26124081	26124081	C	T							6	2019-01-02	ENST00000314332.5:c.52G>A
Breast Cancer (METABRIC, Nature 2012 & Nat Commun 2016)	MB-3275	Breast Invasive Ductal Carcinoma	A18T	OncoKB: Unknown, level NA;CIViC: NA;MyCancerGenome: not present;CancerHotspot: no;3DHotspot: no	MutationAssessor: Error;SIFT: impact: undefined, score: undefined;Polyphen-2: impact: undefined, score: undefined	Missense_Mutation	diploid		NA	NA	METABRIC	6	26124081	26124081	C	T							6	2019-01-02	ENST00000314332.5:c.52G>A
Uterine Corpus Endometrial Carcinoma (TCGA, PanCancer Atlas)	TCGA-A5-A0G1-01	Uterine Serous Carcinoma/Uterine Papillary Serous Carcinoma	A22S	OncoKB: Unknown, level NA;CIViC: NA;MyCancerGenome: not present;CancerHotspot: no;3DHotspot: no	MutationAssessor: Error;SIFT: impact: undefined, score: undefined;Polyphen-2: impact: undefined, score: undefined	Missense_Mutation	diploid		.	.	.	6	26124069	26124069	C	A	0.06		15	221		347	10823	2019-01-02	ENST00000314332.5:c.64G>T
Primary Central Nervous System Lymphoma (Mayo Clinic, Clin Cancer Res 2015)	PCNSL_3	Diffuse Large B-Cell Lymphoma, NOS	G27A	OncoKB: Unknown, level NA;CIViC: NA;MyCancerGenome: not present;CancerHotspot: no;3DHotspot: no	MutationAssessor: Error;SIFT: impact: undefined, score: undefined;Polyphen-2: impact: undefined, score: undefined	Missense_Mutation			NA	NA	Mayo Clinic	6	26124053	26124053	C	G							289	2019-01-02	ENST00000314332.5:c.80G>C
Breast Cancer (METABRIC, Nature 2012 & Nat Commun 2016)	MB-0526	Breast Invasive Ductal Carcinoma	G27S	OncoKB: Unknown, level NA;CIViC: NA;MyCancerGenome: not present;CancerHotspot: no;3DHotspot: no	MutationAssessor: Error;SIFT: impact: undefined, score: undefined;Polyphen-2: impact: undefined, score: undefined	Missense_Mutation	diploid		NA	NA	METABRIC	6	26124054	26124054	C	T							7	2019-01-02	ENST00000314332.5:c.79G>A
Breast Cancer (METABRIC, Nature 2012 & Nat Commun 2016)	MB-5412	Breast Invasive Ductal Carcinoma	G27S	OncoKB: Unknown, level NA;CIViC: NA;MyCancerGenome: not present;CancerHotspot: no;3DHotspot: no	MutationAssessor: Error;SIFT: impact: undefined, score: undefined;Polyphen-2: impact: undefined, score: undefined	Missense_Mutation	diploid		NA	NA	METABRIC	6	26124054	26124054	C	T							10	2019-01-02	ENST00000314332.5:c.79G>A
Primary Central Nervous System Lymphoma (Mayo Clinic, Clin Cancer Res 2015)	PCNSL_3	Diffuse Large B-Cell Lymphoma, NOS	R32H	OncoKB: Unknown, level NA;CIViC: NA;MyCancerGenome: not present;CancerHotspot: no;3DHotspot: no	MutationAssessor: Error;SIFT: impact: undefined, score: undefined;Polyphen-2: impact: undefined, score: undefined	Missense_Mutation			NA	NA	Mayo Clinic	6	26124038	26124038	C	T							289	2019-01-02	ENST00000314332.5:c.95G>A
Medulloblastoma (Sickkids, Nature 2016)	MB-REC-29	Desmoplastic/Nodular Medulloblastoma	S33R	OncoKB: Unknown, level NA;CIViC: NA;MyCancerGenome: not present;CancerHotspot: no;3DHotspot: no	MutationAssessor: Error;SIFT: impact: undefined, score: undefined;Polyphen-2: impact: undefined, score: undefined	Missense_Mutation			NA	NA	The Hospital for Sick Children	6	26124034	26124034	G	T							25	2019-01-02	ENST00000314332.5:c.99C>A
Diffuse Large B cell Lymphoma (DFCI, Nat Med 2018)	DLBCL-MAYO_DLBCL_234	Germinal Center B-Cell Type	K35E	OncoKB: Unknown, level NA;CIViC: NA;MyCancerGenome: not present;CancerHotspot: no;3DHotspot: no	MutationAssessor: Error;SIFT: impact: undefined, score: undefined;Polyphen-2: impact: undefined, score: undefined	Missense_Mutation		1	NA	NA	broad.mit.edu	6	26124030	26124030	T	C	0.04		6	145			4284	2019-01-02	ENST00000314332.5:c.103A>G
Cervical Squamous Cell Carcinoma (TCGA, PanCancer Atlas)	TCGA-C5-A1BJ-01	Cervical Squamous Cell Carcinoma	E36D	OncoKB: Unknown, level NA;CIViC: NA;MyCancerGenome: not present;CancerHotspot: no;3DHotspot: no	MutationAssessor: Error;SIFT: impact: undefined, score: undefined;Polyphen-2: impact: undefined, score: undefined	Missense_Mutation	diploid		.	.	.	6	26124025	26124025	C	G	0.07		18	236		288	139	2019-01-02	ENST00000314332.5:c.108G>C
Diffuse Large B-Cell Lymphoma (Duke, Cell 2017)	DLBCL_DUKE_2788	Diffuse Large B-Cell Lymphoma, NOS	S39A	OncoKB: Unknown, level NA;CIViC: NA;MyCancerGenome: not present;CancerHotspot: no;3DHotspot: no	MutationAssessor: Error;SIFT: impact: undefined, score: undefined;Polyphen-2: impact: undefined, score: undefined	Missense_Mutation			NA	NA	Duke University	6	26124018	26124018	A	C							12	2019-01-02	ENST00000314332.5:c.115T>G
Diffuse Large B-Cell Lymphoma (Duke, Cell 2017)	DLBCL_DUKE_3532	Diffuse Large B-Cell Lymphoma, NOS	Y41D	OncoKB: Unknown, level NA;CIViC: NA;MyCancerGenome: not present;CancerHotspot: no;3DHotspot: no	MutationAssessor: Error;SIFT: impact: undefined, score: undefined;Polyphen-2: impact: undefined, score: undefined	Missense_Mutation			NA	NA	Duke University	6	26124012	26124012	A	C							10	2019-01-02	ENST00000314332.5:c.121T>G
Esophageal Adenocarcinoma (TCGA, PanCancer Atlas)	TCGA-L5-A8NQ-01	Esophageal Squamous Cell Carcinoma	Q48E	OncoKB: Unknown, level NA;CIViC: NA;MyCancerGenome: not present;CancerHotspot: no;3DHotspot: no	MutationAssessor: Error;SIFT: impact: undefined, score: undefined;Polyphen-2: impact: undefined, score: undefined	Missense_Mutation	gain		.	.	.	6	26123991	26123991	G	C	0.04		6	143		157	209	2019-01-02	ENST00000314332.5:c.142C>G
Diffuse Large B-Cell Lymphoma (Duke, Cell 2017)	DLBCL_DUKE_3385	Diffuse Large B-Cell Lymphoma, NOS	P51S	OncoKB: Unknown, level NA;CIViC: NA;MyCancerGenome: not present;CancerHotspot: no;3DHotspot: no	MutationAssessor: Error;SIFT: impact: undefined, score: undefined;Polyphen-2: impact: undefined, score: undefined	Missense_Mutation			NA	NA	Duke University	6	26123982	26123982	G	A							18	2019-01-02	ENST00000314332.5:c.151C>T
Breast Invasive Carcinoma (TCGA, PanCancer Atlas)	TCGA-A8-A09V-01	Breast Invasive Lobular Carcinoma	G54A	OncoKB: Unknown, level NA;CIViC: NA;MyCancerGenome: not present;CancerHotspot: no;3DHotspot: no	MutationAssessor: Error;SIFT: impact: undefined, score: undefined;Polyphen-2: impact: undefined, score: undefined	Missense_Mutation	diploid		.	.	.	6	26123972	26123972	C	G	0.04		11	257		416	30	2019-01-02	ENST00000314332.5:c.161G>C
Stomach Adenocarcinoma (TCGA, PanCancer Atlas)	TCGA-HU-A4GP-01	Diffuse Type Stomach Adenocarcinoma	G54C	OncoKB: Unknown, level NA;CIViC: NA;MyCancerGenome: not present;CancerHotspot: no;3DHotspot: no	MutationAssessor: Error;SIFT: impact: undefined, score: undefined;Polyphen-2: impact: undefined, score: undefined	Missense_Mutation	shallowdel		.	.	.	6	26123973	26123973	C	A	0.04		7	157		291	174	2019-01-02	ENST00000314332.5:c.160G>T
Skin Cutaneous Melanoma (TCGA, PanCancer Atlas)	TCGA-D3-A2JC-06	Cutaneous Melanoma	M60I	OncoKB: Unknown, level NA;CIViC: NA;MyCancerGenome: not present;CancerHotspot: no;3DHotspot: no	MutationAssessor: Error;SIFT: impact: undefined, score: undefined;Polyphen-2: impact: undefined, score: undefined	Missense_Mutation	shallowdel		.	.	.	6	26123953	26123953	C	A	0.09		6	58		234	3148	2019-01-02	ENST00000314332.5:c.180G>T
Diffuse Large B-Cell Lymphoma (Duke, Cell 2017)	DLBCL_DUKE_3776	Diffuse Large B-Cell Lymphoma, NOS	G61D	OncoKB: Unknown, level NA;CIViC: NA;MyCancerGenome: not present;CancerHotspot: no;3DHotspot: no	MutationAssessor: Error;SIFT: impact: undefined, score: undefined;Polyphen-2: impact: undefined, score: undefined	Missense_Mutation		1	NA	NA	Duke University	6	26123951	26123951	C	T							9	2019-01-02	ENST00000314332.5:c.182G>A
Uterine Corpus Endometrial Carcinoma (TCGA, PanCancer Atlas)	TCGA-A5-A2K5-01	Uterine Endometrioid Carcinoma	S65Y	OncoKB: Unknown, level NA;CIViC: NA;MyCancerGenome: not present;CancerHotspot: no;3DHotspot: no	MutationAssessor: Error;SIFT: impact: undefined, score: undefined;Polyphen-2: impact: undefined, score: undefined	Missense_Mutation	diploid	4	.	.	.	6	26123939	26123939	G	T	0.4		35	53		126	8511	2019-01-02	ENST00000314332.5:c.194C>A
Diffuse Large B-Cell Lymphoma (Duke, Cell 2017)	DLBCL_DUKE_2894	Diffuse Large B-Cell Lymphoma, NOS	V67F	OncoKB: Unknown, level NA;CIViC: NA;MyCancerGenome: not present;CancerHotspot: no;3DHotspot: no	MutationAssessor: Error;SIFT: impact: undefined, score: undefined;Polyphen-2: impact: undefined, score: undefined	Missense_Mutation			NA	NA	Duke University	6	26123934	26123934	C	A							3	2019-01-02	ENST00000314332.5:c.199G>T
Diffuse Large B cell Lymphoma (DFCI, Nat Med 2018)	DLBCL-LS2264	Diffuse Large B-Cell Lymphoma, NOS	F71L	OncoKB: Predicted Oncogenic, level NA;CIViC: NA;MyCancerGenome: not present;CancerHotspot: no;3DHotspot: yes	MutationAssessor: Error;SIFT: impact: undefined, score: undefined;Polyphen-2: impact: undefined, score: undefined	Missense_Mutation		1	NA	NA	broad.mit.edu	6	26123922	26123922	A	G	0.09		14	139			46	2019-01-02	ENST00000314332.5:c.211T>C
Breast Invasive Carcinoma (TCGA, PanCancer Atlas)	TCGA-3C-AALI-01	Breast Invasive Ductal Carcinoma	E72Q	OncoKB: Predicted Oncogenic, level NA;CIViC: NA;MyCancerGenome: not present;CancerHotspot: no;3DHotspot: yes	MutationAssessor: Error;SIFT: impact: undefined, score: undefined;Polyphen-2: impact: undefined, score: undefined	Missense_Mutation	diploid	3	.	.	.	6	26123919	26123919	C	G	0.2		34	140		74	458	2019-01-02	ENST00000314332.5:c.214G>C
Diffuse Large B-Cell Lymphoma (Duke, Cell 2017)	DLBCL_DUKE_2165	Diffuse Large B-Cell Lymphoma, NOS	R73C	OncoKB: Unknown, level NA;CIViC: NA;MyCancerGenome: not present;CancerHotspot: no;3DHotspot: no	MutationAssessor: Error;SIFT: impact: undefined, score: undefined;Polyphen-2: impact: undefined, score: undefined	Missense_Mutation			NA	NA	Duke University	6	26123916	26123916	G	A							3	2019-01-02	ENST00000314332.5:c.217C>T
Diffuse Large B-Cell Lymphoma (Duke, Cell 2017)	DLBCL_DUKE_2616	Diffuse Large B-Cell Lymphoma, NOS	R73C	OncoKB: Unknown, level NA;CIViC: NA;MyCancerGenome: not present;CancerHotspot: no;3DHotspot: no	MutationAssessor: Error;SIFT: impact: undefined, score: undefined;Polyphen-2: impact: undefined, score: undefined	Missense_Mutation			NA	NA	Duke University	6	26123916	26123916	G	A							17	2019-01-02	ENST00000314332.5:c.217C>T
Diffuse Large B-Cell Lymphoma (Duke, Cell 2017)	DLBCL_DUKE_3728	Diffuse Large B-Cell Lymphoma, NOS	R73C	OncoKB: Unknown, level NA;CIViC: NA;MyCancerGenome: not present;CancerHotspot: no;3DHotspot: no	MutationAssessor: Error;SIFT: impact: undefined, score: undefined;Polyphen-2: impact: undefined, score: undefined	Missense_Mutation			NA	NA	Duke University	6	26123916	26123916	G	A							9	2019-01-02	ENST00000314332.5:c.217C>T
Diffuse Large B-Cell Lymphoma (Duke, Cell 2017)	DLBCL_DUKE_3750	Diffuse Large B-Cell Lymphoma, NOS	E77G	OncoKB: Predicted Oncogenic, level NA;CIViC: NA;MyCancerGenome: not present;CancerHotspot: no;3DHotspot: yes	MutationAssessor: Error;SIFT: impact: undefined, score: undefined;Polyphen-2: impact: undefined, score: undefined	Missense_Mutation			NA	NA	Duke University	6	26123903	26123903	T	C							6	2019-01-02	ENST00000314332.5:c.230A>G
Ovarian Serous Cystadenocarcinoma (TCGA, PanCancer Atlas)	TCGA-24-1469-01	Serous Ovarian Cancer	E77K	OncoKB: Predicted Oncogenic, level NA;CIViC: NA;MyCancerGenome: not present;CancerHotspot: no;3DHotspot: yes	MutationAssessor: Error;SIFT: impact: undefined, score: undefined;Polyphen-2: impact: undefined, score: undefined	Missense_Mutation	gain		.	.	.	6	26123904	26123904	C	T	0.09		20	210		219	223	2019-01-02	ENST00000314332.5:c.229G>A
Diffuse Large B-Cell Lymphoma (Duke, Cell 2017)	DLBCL_DUKE_2473	Diffuse Large B-Cell Lymphoma, NOS	E77K	OncoKB: Predicted Oncogenic, level NA;CIViC: NA;MyCancerGenome: not present;CancerHotspot: no;3DHotspot: yes	MutationAssessor: Error;SIFT: impact: undefined, score: undefined;Polyphen-2: impact: undefined, score: undefined	Missense_Mutation			NA	NA	Duke University	6	26123904	26123904	C	T							10	2019-01-02	ENST00000314332.5:c.229G>A
Upper Tract Urothelial Carcinoma (Cornell/Baylor/MDACC, Nat Comm 2019)	WCM-UTUC-92	Upper Tract Urothelial Carcinoma	E77K	OncoKB: Predicted Oncogenic, level NA;CIViC: NA;MyCancerGenome: not present;CancerHotspot: no;3DHotspot: yes	MutationAssessor: Error;SIFT: impact: undefined, score: undefined;Polyphen-2: impact: undefined, score: undefined	Missense_Mutation			Somatic	NA	WCM	6	26123904	26123904	C	T	0.46		92	106		181	218	2019-01-02	ENST00000314332.5:c.229G>A
Metastatic Prostate Adenocarcinoma (SU2C/PCF Dream Team, PNAS 2019)	WCM663_Z1	Prostate Adenocarcinoma	S79P	OncoKB: Predicted Oncogenic, level NA;CIViC: NA;MyCancerGenome: not present;CancerHotspot: no;3DHotspot: yes	MutationAssessor: Error;SIFT: impact: undefined, score: undefined;Polyphen-2: impact: undefined, score: undefined	Missense_Mutation	gain	1	NA	NA	WCM	6	26123898	26123898	A	G	0.16		44	232			50	2019-01-02	ENST00000314332.5:c.235T>C
Thymoma (TCGA, PanCancer Atlas)	TCGA-X7-A8D8-01	Thymoma	A82E	OncoKB: Unknown, level NA;CIViC: NA;MyCancerGenome: not present;CancerHotspot: no;3DHotspot: no	MutationAssessor: Error;SIFT: impact: undefined, score: undefined;Polyphen-2: impact: undefined, score: undefined	Missense_Mutation	diploid		.	.	.	6	26123888	26123888	G	T	0.05		4	83		84	33	2019-01-02	ENST00000314332.5:c.245C>A
Diffuse Large B cell Lymphoma (DFCI, Nat Med 2018)	DLBCL-RICOVER_597	Activated B-cell Type	Y84D	OncoKB: Unknown, level NA;CIViC: NA;MyCancerGenome: not present;CancerHotspot: no;3DHotspot: no	MutationAssessor: Error;SIFT: impact: undefined, score: undefined;Polyphen-2: impact: undefined, score: undefined	Missense_Mutation			NA	NA	broad.mit.edu	6	26123883	26123883	A	C	0.12		21	150			78	2019-01-02	ENST00000314332.5:c.250T>G
Diffuse Large B-Cell Lymphoma (Duke, Cell 2017)	DLBCL_DUKE_684	Diffuse Large B-Cell Lymphoma, NOS	N85K	OncoKB: Unknown, level NA;CIViC: NA;MyCancerGenome: not present;CancerHotspot: no;3DHotspot: no	MutationAssessor: Error;SIFT: impact: undefined, score: undefined;Polyphen-2: impact: undefined, score: undefined	Missense_Mutation			NA	NA	Duke University	6	26123878	26123878	G	C							9	2019-01-02	ENST00000314332.5:c.255C>G
Diffuse Large B-Cell Lymphoma (Duke, Cell 2017)	DLBCL_DUKE_2270	Diffuse Large B-Cell Lymphoma, NOS	N85K	OncoKB: Unknown, level NA;CIViC: NA;MyCancerGenome: not present;CancerHotspot: no;3DHotspot: no	MutationAssessor: Error;SIFT: impact: undefined, score: undefined;Polyphen-2: impact: undefined, score: undefined	Missense_Mutation			NA	NA	Duke University	6	26123878	26123878	G	C							7	2019-01-02	ENST00000314332.5:c.255C>G
Uterine Corpus Endometrial Carcinoma (TCGA, PanCancer Atlas)	TCGA-BG-A222-01	Uterine Endometrioid Carcinoma	N85S	OncoKB: Unknown, level NA;CIViC: NA;MyCancerGenome: not present;CancerHotspot: no;3DHotspot: no	MutationAssessor: Error;SIFT: impact: undefined, score: undefined;Polyphen-2: impact: undefined, score: undefined	Missense_Mutation	diploid		.	.	.	6	26123879	26123879	T	C	0.33		37	75		100	4277	2019-01-02	ENST00000314332.5:c.254A>G
Primary Central Nervous System Lymphoma (Mayo Clinic, Clin Cancer Res 2015)	PCNSL_3	Diffuse Large B-Cell Lymphoma, NOS	K86R	OncoKB: Unknown, level NA;CIViC: NA;MyCancerGenome: not present;CancerHotspot: no;3DHotspot: no	MutationAssessor: Error;SIFT: impact: undefined, score: undefined;Polyphen-2: impact: undefined, score: undefined	Missense_Mutation			NA	NA	Mayo Clinic	6	26123876	26123876	T	C							289	2019-01-02	ENST00000314332.5:c.257A>G
Diffuse Large B-Cell Lymphoma (Duke, Cell 2017)	DLBCL_DUKE_2628	Diffuse Large B-Cell Lymphoma, NOS	R87C	OncoKB: Unknown, level NA;CIViC: NA;MyCancerGenome: not present;CancerHotspot: no;3DHotspot: no	MutationAssessor: Error;SIFT: impact: undefined, score: undefined;Polyphen-2: impact: undefined, score: undefined	Missense_Mutation			NA	NA	Duke University	6	26123874	26123874	G	A							4	2019-01-02	ENST00000314332.5:c.259C>T
Lung Adenocarcinoma (TCGA, PanCancer Atlas)	TCGA-MN-A4N5-01	Lung Adenocarcinoma	R93M	OncoKB: Unknown, level NA;CIViC: NA;MyCancerGenome: not present;CancerHotspot: no;3DHotspot: no	MutationAssessor: Error;SIFT: impact: undefined, score: undefined;Polyphen-2: impact: undefined, score: undefined	Missense_Mutation	gain		.	.	.	6	26123855	26123855	C	A	0.18		29	134		212	402	2019-01-02	ENST00000314332.5:c.278G>T
Uterine Corpus Endometrial Carcinoma (TCGA, PanCancer Atlas)	TCGA-FI-A2D5-01	Uterine Endometrioid Carcinoma	E94A	OncoKB: Unknown, level NA;CIViC: NA;MyCancerGenome: not present;CancerHotspot: no;3DHotspot: no	MutationAssessor: Error;SIFT: impact: undefined, score: undefined;Polyphen-2: impact: undefined, score: undefined	Missense_Mutation	diploid	1	.	.	.	6	26123852	26123852	T	G	0.25		45	135		148	13874	2019-01-02	ENST00000314332.5:c.281A>C
Primary Central Nervous System Lymphoma (Mayo Clinic, Clin Cancer Res 2015)	PCNSL_3	Diffuse Large B-Cell Lymphoma, NOS	E94D	OncoKB: Unknown, level NA;CIViC: NA;MyCancerGenome: not present;CancerHotspot: no;3DHotspot: no	MutationAssessor: Error;SIFT: impact: undefined, score: undefined;Polyphen-2: impact: undefined, score: undefined	Missense_Mutation		1	NA	NA	Mayo Clinic	6	26123851	26123851	C	G							289	2019-01-02	ENST00000314332.5:c.282G>C
Uterine Corpus Endometrial Carcinoma (TCGA, PanCancer Atlas)	TCGA-A5-A0G1-01	Uterine Serous Carcinoma/Uterine Papillary Serous Carcinoma	A98T	OncoKB: Predicted Oncogenic, level NA;CIViC: NA;MyCancerGenome: not present;CancerHotspot: no;3DHotspot: yes	MutationAssessor: Error;SIFT: impact: undefined, score: undefined;Polyphen-2: impact: undefined, score: undefined	Missense_Mutation	diploid	1	.	.	.	6	26123841	26123841	C	T	0.08		14	160		218	10823	2019-01-02	ENST00000314332.5:c.292G>A
Uterine Corpus Endometrial Carcinoma (TCGA, PanCancer Atlas)	TCGA-DI-A1BU-01	Uterine Mixed Endometrial Carcinoma	H110R	OncoKB: Unknown, level NA;CIViC: NA;MyCancerGenome: not present;CancerHotspot: no;3DHotspot: no	MutationAssessor: Error;SIFT: impact: undefined, score: undefined;Polyphen-2: impact: undefined, score: undefined	Missense_Mutation	diploid		.	.	.	6	26123804	26123804	T	C	0.1		17	156		83	7644	2019-01-02	ENST00000314332.5:c.329A>G
Diffuse Large B-Cell Lymphoma (TCGA, PanCancer Atlas)	TCGA-FF-8047-01	Diffuse Large B-Cell Lymphoma, NOS	T120I	OncoKB: Unknown, level NA;CIViC: NA;MyCancerGenome: not present;CancerHotspot: no;3DHotspot: no	MutationAssessor: Error;SIFT: impact: undefined, score: undefined;Polyphen-2: impact: undefined, score: undefined	Missense_Mutation	diploid		.	.	.	6	26123774	26123774	G	A	0.33		36	74		128	112	2019-01-02	ENST00000314332.5:c.359C>T
Diffuse Large B-Cell Lymphoma (Duke, Cell 2017)	DLBCL_DUKE_2950	Diffuse Large B-Cell Lymphoma, NOS	K121N	OncoKB: Unknown, level NA;CIViC: NA;MyCancerGenome: not present;CancerHotspot: no;3DHotspot: no	MutationAssessor: Error;SIFT: impact: undefined, score: undefined;Polyphen-2: impact: undefined, score: undefined	Missense_Mutation			NA	NA	Duke University	6	26123770	26123770	C	G							25	2019-01-02	ENST00000314332.5:c.363G>C
Diffuse Large B-Cell Lymphoma (Duke, Cell 2017)	DLBCL_DUKE_3684	Diffuse Large B-Cell Lymphoma, NOS	K121R	OncoKB: Unknown, level NA;CIViC: NA;MyCancerGenome: not present;CancerHotspot: no;3DHotspot: no	MutationAssessor: Error;SIFT: impact: undefined, score: undefined;Polyphen-2: impact: undefined, score: undefined	Missense_Mutation			NA	NA	Duke University	6	26123771	26123771	T	C							16	2019-01-02	ENST00000314332.5:c.362A>G
Uterine Corpus Endometrial Carcinoma (TCGA, PanCancer Atlas)	TCGA-EC-A24G-01	Uterine Endometrioid Carcinoma	T123A	OncoKB: Unknown, level NA;CIViC: NA;MyCancerGenome: not present;CancerHotspot: no;3DHotspot: no	MutationAssessor: Error;SIFT: impact: undefined, score: undefined;Polyphen-2: impact: undefined, score: undefined	Missense_Mutation	diploid	1	.	.	.	6	26123766	26123766	T	C	0.26		39	112		159	1020	2019-01-02	ENST00000314332.5:c.367A>G
Diffuse Large B cell Lymphoma (DFCI, Nat Med 2018)	DLBCL-LS2328	Germinal Center B-Cell Type	S124I	OncoKB: Unknown, level NA;CIViC: NA;MyCancerGenome: not present;CancerHotspot: no;3DHotspot: no	MutationAssessor: Error;SIFT: impact: undefined, score: undefined;Polyphen-2: impact: undefined, score: undefined	Missense_Mutation			NA	NA	broad.mit.edu	6	26123762	26123762	C	A	0.11		9	73			59	2019-01-02	ENST00000314332.5:c.371G>T
Diffuse Large B-Cell Lymphoma (Duke, Cell 2017)	DLBCL_DUKE_2222	Diffuse Large B-Cell Lymphoma, NOS	S125F	OncoKB: Unknown, level NA;CIViC: NA;MyCancerGenome: not present;CancerHotspot: no;3DHotspot: no	MutationAssessor: Error;SIFT: impact: undefined, score: undefined;Polyphen-2: impact: undefined, score: undefined	Missense_Mutation		1	NA	NA	Duke University	6	26123759	26123759	G	A							10	2019-01-02	ENST00000314332.5:c.374C>T
Diffuse Large B cell Lymphoma (DFCI, Nat Med 2018)	DLBCL-LS3271	Activated B-cell Type	K126N	OncoKB: Unknown, level NA;CIViC: NA;MyCancerGenome: not present;CancerHotspot: no;3DHotspot: no	MutationAssessor: Error;SIFT: impact: undefined, score: undefined;Polyphen-2: impact: undefined, score: undefined	Missense_Mutation			NA	NA	broad.mit.edu	6	26123755	26123755	C	G	0.04		4	101			156	2019-01-02	ENST00000314332.5:c.378G>C

## Sheet: HIST1H2BD
Study	Sample ID	Cancer Type	Protein Change	Annotation	Functional Impact	Mutation Type	Copy #	COSMIC	MS	VS	Center	Chromosome	Start Pos	End Pos	Ref	Var	Allele Freq (T)	Allele Freq (N)	Variant Reads	Ref Reads	Variant Reads (N)	Ref Reads (N)	# Mut in Sample
MSK-IMPACT Clinical Sequencing Cohort (MSKCC, Nat Med 2017)	P-0010232-T01-IM5	Cutaneous Melanoma	P2F	OncoKB: Unknown, level NA;CIViC: NA;MyCancerGenome: not present;CancerHotspot: no;3DHotspot: no		Missense_Mutation			NA	NA	NA	6	26158401	26158402	CC	TT				672			15
MSK-IMPACT Clinical Sequencing Cohort (MSKCC, Nat Med 2017)	P-0011088-T01-IM5	Prostate Adenocarcinoma	P2L	OncoKB: Unknown, level NA;CIViC: NA;MyCancerGenome: not present;CancerHotspot: no;3DHotspot: no	MutationAssessor: impact: medium, score: 2.27;SIFT: impact: deleterious_low_confidence, score: 0;Polyphen-2: impact: benign, score: 0.305	Missense_Mutation			NA	NA	NA	6	26158402	26158402	C	T				854			3
MSK-IMPACT Clinical Sequencing Cohort (MSKCC, Nat Med 2017)	P-0008480-T01-IM5	Cutaneous Squamous Cell Carcinoma	E3K	OncoKB: Unknown, level NA;CIViC: NA;MyCancerGenome: not present;CancerHotspot: no;3DHotspot: yes	MutationAssessor: impact: medium, score: 2.075;SIFT: impact: deleterious_low_confidence, score: 0.02;Polyphen-2: impact: benign, score: 0.37	Missense_Mutation		2	NA	NA	NA	6	26158404	26158404	G	A				519			107
Bladder Cancer (TCGA, Cell 2017)	TCGA-DK-A1AC-01	Bladder Urothelial Carcinoma	E3K	OncoKB: Unknown, level NA;CIViC: NA;MyCancerGenome: not present;CancerHotspot: no;3DHotspot: yes	MutationAssessor: impact: medium, score: 2.075;SIFT: impact: deleterious_low_confidence, score: 0.02;Polyphen-2: impact: benign, score: 0.37	Missense_Mutation		2	Somatic	NaN	broad.mit.edu	6	26158404	26158404	G	A				51			1259
Head and Neck Squamous Cell Carcinoma (TCGA, Provisional)	TCGA-CN-A641-01	Head and Neck Squamous Cell Carcinoma	E3Q	OncoKB: Unknown, level NA;CIViC: NA;MyCancerGenome: not present;CancerHotspot: no;3DHotspot: yes	MutationAssessor: impact: medium, score: 2.765;SIFT: impact: deleterious_low_confidence, score: 0.05;Polyphen-2: impact: possibly_damaging, score: 0.653	Missense_Mutation		2	Somatic	NA	broad.mit.edu	6	26158404	26158404	G	C			7	111			201
MSK-IMPACT Clinical Sequencing Cohort for Non-Small Cell Cancer (MSK, Cancer Discovery 2017)	P-0003316-T01-IM5	Lung Adenocarcinoma	P4H	OncoKB: Unknown, level NA;CIViC: NA;MyCancerGenome: not present;CancerHotspot: no;3DHotspot: no	MutationAssessor: impact: medium, score: 2.34;SIFT: impact: deleterious_low_confidence, score: 0.04;Polyphen-2: impact: possibly_damaging, score: 0.451	Missense_Mutation		1	SOMATIC	NA	MSKCC	6	26158408	26158408	C	A							5
Cervical Squamous Cell Carcinoma and Endocervical Adenocarcinoma (TCGA, Provisional)	TCGA-EX-A69M-01	Cervical Squamous Cell Carcinoma	P4S	OncoKB: Unknown, level NA;CIViC: NA;MyCancerGenome: not present;CancerHotspot: no;3DHotspot: no	MutationAssessor: impact: low, score: 1.645;SIFT: impact: tolerated_low_confidence, score: 0.11;Polyphen-2: impact: benign, score: 0.132	Missense_Mutation		1	Somatic	Untested	genome.wustl.edu	6	26158407	26158407	C	T				182		83	45
Uterine Corpus Endometrial Carcinoma (TCGA, Provisional)	TCGA-A5-A0GB-01	Uterine Endometrioid Carcinoma	S7Y	OncoKB: Unknown, level NA;CIViC: NA;MyCancerGenome: not present;CancerHotspot: no;3DHotspot: yes	MutationAssessor: impact: medium, score: 2.8;SIFT: impact: deleterious_low_confidence, score: 0.01;Polyphen-2: impact: benign, score: 0.264	Missense_Mutation		1	Somatic	Untested	genome.wustl.edu	6	26158417	26158417	C	A			80	96		137	510
Pan-Lung Cancer (TCGA, Nat Genet 2016)	TCGA-85-8353-01	Lung Squamous Cell Carcinoma	A8G	OncoKB: Unknown, level NA;CIViC: NA;MyCancerGenome: not present;CancerHotspot: no;3DHotspot: no	MutationAssessor: impact: medium, score: 2.585;SIFT: impact: deleterious_low_confidence, score: 0.04;Polyphen-2: impact: benign, score: 0.027	Missense_Mutation		1	Somatic	NA	broad.mit.edu	6	26158420	26158420	C	G			23	89		113	159
MSK-IMPACT Clinical Sequencing Cohort (MSKCC, Nat Med 2017)	P-0009962-T01-IM5	Cutaneous Squamous Cell Carcinoma	P9A	OncoKB: Unknown, level NA;CIViC: NA;MyCancerGenome: not present;CancerHotspot: no;3DHotspot: yes	MutationAssessor: impact: medium, score: 2.405;SIFT: impact: tolerated_low_confidence, score: 0.08;Polyphen-2: impact: benign, score: 0.001	Missense_Mutation		1	NA	NA	NA	6	26158422	26158422	C	G				501			26
Breast Invasive Carcinoma (Sanger, Nature 2012)	PD3988a	Invasive Breast Carcinoma	P9L	OncoKB: Unknown, level NA;CIViC: NA;MyCancerGenome: not present;CancerHotspot: no;3DHotspot: yes	MutationAssessor: impact: medium, score: 2.405;SIFT: impact: deleterious_low_confidence, score: 0.02;Polyphen-2: impact: benign, score: 0.419	Missense_Mutation		1	Unknown	Unknown	Sanger	6	26158423	26158423	C	T							32
Pan-Lung Cancer (TCGA, Nat Genet 2016)	LUAD-E00934-Tumor	Lung Adenocarcinoma	A10D	OncoKB: Unknown, level NA;CIViC: NA;MyCancerGenome: not present;CancerHotspot: no;3DHotspot: yes	MutationAssessor: impact: medium, score: 2.79;SIFT: impact: deleterious_low_confidence, score: 0.02;Polyphen-2: impact: benign, score: 0.006	Missense_Mutation		2	Somatic	NA	broad.mit.edu	6	26158426	26158426	C	A			34	98		89	530
Breast Invasive Carcinoma (Broad, Nature 2012)	BR-V-044	Breast Ductal Carcinoma In Situ	A10G	OncoKB: Unknown, level NA;CIViC: NA;MyCancerGenome: not present;CancerHotspot: no;3DHotspot: yes	MutationAssessor: impact: medium, score: 2.79;SIFT: impact: deleterious_low_confidence, score: 0.05;Polyphen-2: impact: benign, score: 0.045	Missense_Mutation		2	Somatic	NA	broad.mit.edu	6	26158426	26158426	C	G							20
Uterine Corpus Endometrial Carcinoma (TCGA, Provisional)	TCGA-D1-A0ZO-01	Uterine Endometrioid Carcinoma	A10V	OncoKB: Unknown, level NA;CIViC: NA;MyCancerGenome: not present;CancerHotspot: no;3DHotspot: yes	MutationAssessor: impact: medium, score: 2.445;SIFT: impact: tolerated_low_confidence, score: 0.14;Polyphen-2: impact: benign, score: 0.099	Missense_Mutation		2	Somatic	Untested	genome.wustl.edu	6	26158426	26158426	C	T			86	291		361	419
MSK-IMPACT Clinical Sequencing Cohort for Non-Small Cell Cancer (MSK, Cancer Discovery 2017)	P-0007916-T01-IM5	Lung Adenocarcinoma	G14C	OncoKB: Unknown, level NA;CIViC: NA;MyCancerGenome: not present;CancerHotspot: no;3DHotspot: no	MutationAssessor: impact: medium, score: 2.9;SIFT: impact: deleterious_low_confidence, score: 0;Polyphen-2: impact: probably_damaging, score: 1	Missense_Mutation			SOMATIC	NA	MSKCC	6	26158437	26158437	G	T							15
Chronic Lymphocytic Leukemia (IUOPA, Nature 2015)	cll_iuopa_2015_345	Chronic Lymphocytic Leukemia	G14D	OncoKB: Unknown, level NA;CIViC: NA;MyCancerGenome: not present;CancerHotspot: no;3DHotspot: no	MutationAssessor: impact: medium, score: 2.9;SIFT: impact: deleterious_low_confidence, score: 0.01;Polyphen-2: impact: probably_damaging, score: 0.999	Missense_Mutation			NA	NA	www.unioviedo.es/IUOPA/	6	26158438	26158438	G	A							21
Colorectal Adenocarcinoma (DFCI, Cell Reports 2016)	coadread_dfci_2016_2289	Colorectal Adenocarcinoma	A18V	OncoKB: Unknown, level NA;CIViC: NA;MyCancerGenome: not present;CancerHotspot: no;3DHotspot: no	MutationAssessor: impact: low, score: 1.79;SIFT: impact: tolerated_low_confidence, score: 0.05;Polyphen-2: impact: benign, score: 0	Missense_Mutation			NA	NA	dfci.harvard.edu	6	26158450	26158450	C	T							114
MSK-IMPACT Clinical Sequencing Cohort (MSKCC, Nat Med 2017)	P-0003514-T01-IM5	Colon Adenocarcinoma	V19L	OncoKB: Unknown, level NA;CIViC: NA;MyCancerGenome: not present;CancerHotspot: no;3DHotspot: no	MutationAssessor: impact: medium, score: 2.75;SIFT: impact: deleterious_low_confidence, score: 0.02;Polyphen-2: impact: benign, score: 0.001	Missense_Mutation			NA	NA	NA	6	26158452	26158452	G	T				488			6
MSK-IMPACT Clinical Sequencing Cohort (MSKCC, Nat Med 2017)	P-0003179-T02-IM5	Breast Invasive Ductal Carcinoma	T20I	OncoKB: Unknown, level NA;CIViC: NA;MyCancerGenome: not present;CancerHotspot: no;3DHotspot: no	MutationAssessor: impact: medium, score: 2.875;SIFT: impact: deleterious_low_confidence, score: 0.03;Polyphen-2: impact: benign, score: 0.387	Missense_Mutation			NA	NA	NA	6	26158456	26158456	C	T				672			8
MSK-IMPACT Clinical Sequencing Cohort (MSKCC, Nat Med 2017)	P-0003179-T01-IM5	Breast Invasive Ductal Carcinoma	T20I	OncoKB: Unknown, level NA;CIViC: NA;MyCancerGenome: not present;CancerHotspot: no;3DHotspot: no	MutationAssessor: impact: medium, score: 2.875;SIFT: impact: deleterious_low_confidence, score: 0.03;Polyphen-2: impact: benign, score: 0.387	Missense_Mutation			NA	NA	NA	6	26158456	26158456	C	T				727			8
Lymphoid Neoplasm Diffuse Large B-cell Lymphoma (TCGA, Provisional)	TCGA-G8-6324-01	Diffuse Large B-Cell Lymphoma	T20I	OncoKB: Unknown, level NA;CIViC: NA;MyCancerGenome: not present;CancerHotspot: no;3DHotspot: no	MutationAssessor: impact: medium, score: 2.875;SIFT: impact: deleterious_low_confidence, score: 0.03;Polyphen-2: impact: benign, score: 0.387	Missense_Mutation			Somatic	Untested	hgsc.bcm.edu	6	26158456	26158456	C	T			61	84		174	2454
Ovarian Serous Cystadenocarcinoma (TCGA, Provisional)	TCGA-13-0899-01	Serous Ovarian Cancer	A22G	OncoKB: Unknown, level NA;CIViC: NA;MyCancerGenome: not present;CancerHotspot: no;3DHotspot: yes	MutationAssessor: impact: medium, score: 2.32;SIFT: impact: tolerated_low_confidence, score: 0.06;Polyphen-2: impact: benign, score: 0.341	Missense_Mutation		1	Somatic	Valid	broad.mit.edu	6	26158462	26158462	C	G							30
Head and Neck Squamous Cell Carcinoma (TCGA, Provisional)	TCGA-BB-4223-01	Head and Neck Squamous Cell Carcinoma	Q23L	OncoKB: Unknown, level NA;CIViC: NA;MyCancerGenome: not present;CancerHotspot: no;3DHotspot: yes	MutationAssessor: impact: medium, score: 2.9;SIFT: impact: deleterious_low_confidence, score: 0.02;Polyphen-2: impact: benign, score: 0.252	Missense_Mutation			Somatic	NA	broad.mit.edu	6	26158465	26158465	A	T			11	303			296
Pan-Lung Cancer (TCGA, Nat Genet 2016)	LUAD-RT-S01707-Tumor	Lung Adenocarcinoma	G27R	OncoKB: Unknown, level NA;CIViC: NA;MyCancerGenome: not present;CancerHotspot: no;3DHotspot: no	MutationAssessor: impact: medium, score: 2.19;SIFT: impact: tolerated_low_confidence, score: 0.06;Polyphen-2: impact: possibly_damaging, score: 0.503	Missense_Mutation			Somatic	NA	broad.mit.edu	6	26158476	26158476	G	C			42	113		169	866
Skin Cutaneous Melanoma (Broad, Cell 2012)	ME016	Cutaneous Melanoma	G27W	OncoKB: Unknown, level NA;CIViC: NA;MyCancerGenome: not present;CancerHotspot: no;3DHotspot: no	MutationAssessor: impact: medium, score: 2.74;SIFT: impact: deleterious_low_confidence, score: 0;Polyphen-2: impact: possibly_damaging, score: 0.702	Missense_Mutation			NA	NA	broad.mit.edu	6	26158476	26158476	G	T							286
MSK-IMPACT Clinical Sequencing Cohort (MSKCC, Nat Med 2017)	P-0010916-T01-IM5	Lung Adenocarcinoma	R30L	OncoKB: Unknown, level NA;CIViC: NA;MyCancerGenome: not present;CancerHotspot: no;3DHotspot: no	MutationAssessor: impact: medium, score: 2.565;SIFT: impact: deleterious_low_confidence, score: 0;Polyphen-2: impact: benign, score: 0	Missense_Mutation			NA	NA	NA	6	26158486	26158486	G	T				1064			46
Uterine Corpus Endometrial Carcinoma (TCGA, Provisional)	TCGA-AP-A054-01	Uterine Endometrioid Carcinoma	K31E	OncoKB: Unknown, level NA;CIViC: NA;MyCancerGenome: not present;CancerHotspot: no;3DHotspot: no	MutationAssessor: impact: medium, score: 2.8;SIFT: impact: deleterious_low_confidence, score: 0;Polyphen-2: impact: benign, score: 0.16	Missense_Mutation		1	Somatic	Untested	genome.wustl.edu	6	26158488	26158488	A	G			51	91		136	839
MSK-IMPACT Clinical Sequencing Cohort (MSKCC, Nat Med 2017)	P-0004379-T01-IM5	Uterine Endometrioid Carcinoma	R32C	OncoKB: Unknown, level NA;CIViC: NA;MyCancerGenome: not present;CancerHotspot: no;3DHotspot: no	MutationAssessor: impact: low, score: 1.79;SIFT: impact: tolerated_low_confidence, score: 0.12;Polyphen-2: impact: benign, score: 0	Missense_Mutation			NA	NA	NA	6	26158491	26158491	C	T				435			439
Cervical Squamous Cell Carcinoma and Endocervical Adenocarcinoma (TCGA, Provisional)	TCGA-C5-A7UH-01	Cervical Squamous Cell Carcinoma	R32L	OncoKB: Unknown, level NA;CIViC: NA;MyCancerGenome: not present;CancerHotspot: no;3DHotspot: no	MutationAssessor: impact: medium, score: 2.14;SIFT: impact: deleterious_low_confidence, score: 0.04;Polyphen-2: impact: benign, score: 0.155	Missense_Mutation			Somatic	Untested	genome.wustl.edu	6	26158492	26158492	G	T				86		132	203
Uterine Corpus Endometrial Carcinoma (TCGA, Provisional)	TCGA-AP-A0LT-01	Uterine Endometrioid Carcinoma	K35R	OncoKB: Unknown, level NA;CIViC: NA;MyCancerGenome: not present;CancerHotspot: no;3DHotspot: yes	MutationAssessor: impact: low, score: 1.595;SIFT: impact: tolerated_low_confidence, score: 0.09;Polyphen-2: impact: benign, score: 0.01	Missense_Mutation		1	Somatic	Untested	genome.wustl.edu	6	26158501	26158501	A	G			73	91		142	477
TCGA data for Esophagus-Stomach Cancers (TCGA, Nature 2017)	TCGA-CG-5721-01	Stomach Adenocarcinoma	S37C	OncoKB: Unknown, level NA;CIViC: NA;MyCancerGenome: not present;CancerHotspot: no;3DHotspot: yes	MutationAssessor: impact: medium, score: 3.265;SIFT: impact: deleterious_low_confidence, score: 0;Polyphen-2: impact: possibly_damaging, score: 0.834	Missense_Mutation		1	Somatic	Untested	genome.wustl.edu	6	26158506	26158506	A	T			51	205		322	3803
MSK-IMPACT Clinical Sequencing Cohort (MSKCC, Nat Med 2017)	P-0005612-T01-IM5	Diffuse Large B-Cell Lymphoma	S37R	OncoKB: Unknown, level NA;CIViC: NA;MyCancerGenome: not present;CancerHotspot: no;3DHotspot: yes	MutationAssessor: impact: medium, score: 2.915;SIFT: impact: deleterious_low_confidence, score: 0;Polyphen-2: impact: possibly_damaging, score: 0.908	Missense_Mutation		1	NA	NA	NA	6	26158508	26158508	C	G				866			8
Head and Neck Squamous Cell Carcinoma (TCGA, Provisional)	TCGA-CV-5430-01	Head and Neck Squamous Cell Carcinoma	S37R	OncoKB: Unknown, level NA;CIViC: NA;MyCancerGenome: not present;CancerHotspot: no;3DHotspot: yes	MutationAssessor: impact: medium, score: 2.915;SIFT: impact: deleterious_low_confidence, score: 0;Polyphen-2: impact: possibly_damaging, score: 0.908	Missense_Mutation		1	Somatic	NA	broad.mit.edu	6	26158508	26158508	C	G			17	166			146
MSK-IMPACT Clinical Sequencing Cohort (MSKCC, Nat Med 2017)	P-0006695-T01-IM5	Diffuse Large B-Cell Lymphoma	S37T	OncoKB: Unknown, level NA;CIViC: NA;MyCancerGenome: not present;CancerHotspot: no;3DHotspot: yes	MutationAssessor: impact: neutral, score: 0.125;SIFT: impact: tolerated_low_confidence, score: 0.13;Polyphen-2: impact: benign, score: 0.007	Missense_Mutation		1	NA	NA	NA	6	26158507	26158507	G	C				422			54
Pancreatic Neuroendocrine Tumors (Johns Hopkins University, Science 2011)	PanNET24PT	Pancreatic Neuroendocrine Tumor	S39L	OncoKB: Unknown, level NA;CIViC: NA;MyCancerGenome: not present;CancerHotspot: no;3DHotspot: no	MutationAssessor: impact: medium, score: 2.29;SIFT: impact: deleterious_low_confidence, score: 0;Polyphen-2: impact: benign, score: 0.201	Missense_Mutation		1	NA	NA	John Hopkins	6	26158513	26158513	C	T							19
Colorectal Adenocarcinoma (TCGA, Provisional)	TCGA-AA-A01R-01	Mucinous Adenocarcinoma of the Colon and Rectum	V40M	OncoKB: Unknown, level NA;CIViC: NA;MyCancerGenome: not present;CancerHotspot: no;3DHotspot: no	MutationAssessor: impact: neutral, score: 0.49;SIFT: impact: tolerated_low_confidence, score: 0.16;Polyphen-2: impact: benign, score: 0.02	Missense_Mutation		1	Somatic	Valid	broad.mit.edu	6	26158515	26158515	G	A							1227
Colon Adenocarcinoma (TCGA, PanCancer Atlas)	TCGA-CM-5861-01	Colon Adenocarcinoma	K44N	OncoKB: Unknown, level NA;CIViC: NA;MyCancerGenome: not present;CancerHotspot: no;3DHotspot: no	MutationAssessor: impact: high, score: 4.175;SIFT: impact: deleterious_low_confidence, score: 0.01;Polyphen-2: impact: benign, score: 0.098	Missense_Mutation		1	.	.	.	6	26158529	26158529	G	T			71	134		185	1363
Esophageal Squamous Cell Carcinoma (ICGC, Nature 2014)	ESCC-180T	Esophageal Squamous Cell Carcinoma	V45L	OncoKB: Unknown, level NA;CIViC: NA;MyCancerGenome: not present;CancerHotspot: no;3DHotspot: yes	MutationAssessor: impact: medium, score: 3.26;SIFT: impact: deleterious_low_confidence, score: 0.02;Polyphen-2: impact: benign, score: 0.026	Missense_Mutation		1	Somatic	NA	BGI	6	26158530	26158530	G	C			102	243	1	405	61
MSK-IMPACT Clinical Sequencing Cohort (MSKCC, Nat Med 2017)	P-0012253-T01-IM5	Renal Clear Cell Carcinoma	Q48E	OncoKB: Unknown, level NA;CIViC: NA;MyCancerGenome: not present;CancerHotspot: no;3DHotspot: no	MutationAssessor: impact: medium, score: 3.04;SIFT: impact: deleterious_low_confidence, score: 0;Polyphen-2: impact: benign, score: 0.287	Missense_Mutation		1	NA	NA	NA	6	26158539	26158539	C	G				499			8
Non-Hodgkin Lymphoma (BCGSC, Nature 2011)	DLBCL-PatientB	Non-Hodgkin Lymphoma	Q48E	OncoKB: Unknown, level NA;CIViC: NA;MyCancerGenome: not present;CancerHotspot: no;3DHotspot: no	MutationAssessor: impact: medium, score: 3.04;SIFT: impact: deleterious_low_confidence, score: 0;Polyphen-2: impact: benign, score: 0.287	Missense_Mutation		1	Somatic	Valid	NA	6	26158539	26158539	C	G							60
Diffuse Large B-cell Lymphoma (BCGSC, Blood 2013)	RG067	Diffuse Large B-Cell Lymphoma, NOS	Q48E	OncoKB: Unknown, level NA;CIViC: NA;MyCancerGenome: not present;CancerHotspot: no;3DHotspot: no	MutationAssessor: impact: medium, score: 3.04;SIFT: impact: deleterious_low_confidence, score: 0;Polyphen-2: impact: benign, score: 0.287	Missense_Mutation		1	somatic	NA	NA	6	26158539	26158539	C	G							49
NCI-60 Cell Lines (NCI, Cancer Res. 2012)	HCT_116	Colorectal Adenocarcinoma	Q48R	OncoKB: Unknown, level NA;CIViC: NA;MyCancerGenome: not present;CancerHotspot: no;3DHotspot: no	MutationAssessor: impact: medium, score: 3.34;SIFT: impact: deleterious_low_confidence, score: 0.03;Polyphen-2: impact: benign, score: 0.044	Missense_Mutation		1	NA	NA	discover.nci.nih.gov	6	26158540	26158540	A	G							1787
Pan-Lung Cancer (TCGA, Nat Genet 2016)	TCGA-78-7542-01	Lung Adenocarcinoma	V49F	OncoKB: Unknown, level NA;CIViC: NA;MyCancerGenome: not present;CancerHotspot: no;3DHotspot: no	MutationAssessor: impact: high, score: 3.92;SIFT: impact: deleterious_low_confidence, score: 0;Polyphen-2: impact: probably_damaging, score: 1	Missense_Mutation		1	Somatic	NA	broad.mit.edu	6	26158542	26158542	G	T			24	223		237	307
Skin Cutaneous Melanoma (TCGA, Provisional)	TCGA-ER-A19P-06	Cutaneous Melanoma	P51H	OncoKB: Unknown, level NA;CIViC: NA;MyCancerGenome: not present;CancerHotspot: no;3DHotspot: no	MutationAssessor: impact: high, score: 3.825;SIFT: impact: deleterious_low_confidence, score: 0.02;Polyphen-2: impact: possibly_damaging, score: 0.866	Missense_Mutation			Somatic	NA	broad.mit.edu	6	26158549	26158549	C	A			8	229			1580
MSK-IMPACT Clinical Sequencing Cohort in Prostate Cancer (MSK, JCO Precision Oncology 2017)	P-0001204-T01-IM3	Prostate Adenocarcinoma	D52H	OncoKB: Unknown, level NA;CIViC: NA;MyCancerGenome: not present;CancerHotspot: no;3DHotspot: yes	MutationAssessor: impact: medium, score: 3.11;SIFT: impact: deleterious_low_confidence, score: 0.01;Polyphen-2: impact: benign, score: 0.255	Missense_Mutation		2	SOMATIC	NA	MSKCC	6	26158551	26158551	G	C							2
MSK-IMPACT Clinical Sequencing Cohort in Prostate Cancer (MSK, JCO Precision Oncology 2017)	P-0001204-T02-IM5	Prostate Adenocarcinoma	D52H	OncoKB: Unknown, level NA;CIViC: NA;MyCancerGenome: not present;CancerHotspot: no;3DHotspot: yes	MutationAssessor: impact: medium, score: 3.11;SIFT: impact: deleterious_low_confidence, score: 0.01;Polyphen-2: impact: benign, score: 0.255	Missense_Mutation		2	SOMATIC	NA	MSKCC	6	26158551	26158551	G	C							3
MSK-IMPACT Clinical Sequencing Cohort (MSKCC, Nat Med 2017)	P-0001204-T03-IM5	Prostate Adenocarcinoma	D52H	OncoKB: Unknown, level NA;CIViC: NA;MyCancerGenome: not present;CancerHotspot: no;3DHotspot: yes	MutationAssessor: impact: medium, score: 3.11;SIFT: impact: deleterious_low_confidence, score: 0.01;Polyphen-2: impact: benign, score: 0.255	Missense_Mutation		2	NA	NA	NA	6	26158551	26158551	G	C				469			3
MSK-IMPACT Clinical Sequencing Cohort (MSKCC, Nat Med 2017)	P-0007376-T01-IM5	Sarcoma, NOS	D52N	OncoKB: Unknown, level NA;CIViC: NA;MyCancerGenome: not present;CancerHotspot: no;3DHotspot: yes	MutationAssessor: impact: medium, score: 2.505;SIFT: impact: deleterious_low_confidence, score: 0.02;Polyphen-2: impact: possibly_damaging, score: 0.706	Missense_Mutation		2	NA	NA	NA	6	26158551	26158551	G	A				334			5
Stomach Adenocarcinoma (TCGA, Provisional)	TCGA-BR-8370-01	Diffuse Type Stomach Adenocarcinoma	D52N	OncoKB: Unknown, level NA;CIViC: NA;MyCancerGenome: not present;CancerHotspot: no;3DHotspot: yes	MutationAssessor: impact: medium, score: 2.505;SIFT: impact: deleterious_low_confidence, score: 0.02;Polyphen-2: impact: possibly_damaging, score: 0.706	Missense_Mutation		2	Somatic	Untested	genome.wustl.edu	6	26158551	26158551	G	A							107
Small Cell Lung Cancer (CLCGP, Nat Genet 2012)	S01512	Small Cell Lung Cancer	D52Y	OncoKB: Unknown, level NA;CIViC: NA;MyCancerGenome: not present;CancerHotspot: no;3DHotspot: yes	MutationAssessor: impact: medium, score: 3.46;SIFT: impact: deleterious_low_confidence, score: 0.01;Polyphen-2: impact: benign, score: 0.359	Missense_Mutation		2	NA	Unknown	CLCGP	6	26158551	26158551	G	T							224
Bladder Cancer (TCGA, Cell 2017)	TCGA-GD-A3OQ-01	Bladder Urothelial Carcinoma	I55M	OncoKB: Unknown, level NA;CIViC: NA;MyCancerGenome: not present;CancerHotspot: no;3DHotspot: no	MutationAssessor: impact: medium, score: 2.935;SIFT: impact: deleterious_low_confidence, score: 0.02;Polyphen-2: impact: possibly_damaging, score: 0.843	Missense_Mutation		1	Somatic	NaN	broad.mit.edu	6	26158562	26158562	C	G				245			113
Bladder Cancer (TCGA, Cell 2017)	TCGA-XF-AAMG-01	Bladder Urothelial Carcinoma	S56C	OncoKB: Unknown, level NA;CIViC: NA;MyCancerGenome: not present;CancerHotspot: no;3DHotspot: no	MutationAssessor: impact: high, score: 4.325;SIFT: impact: deleterious_low_confidence, score: 0;Polyphen-2: impact: possibly_damaging, score: 0.818	Missense_Mutation		1	Somatic	NaN	broad.mit.edu	6	26158564	26158564	C	G				341			881
Colorectal Adenocarcinoma (DFCI, Cell Reports 2016)	coadread_dfci_2016_407	Colorectal Adenocarcinoma	M60I	OncoKB: Unknown, level NA;CIViC: NA;MyCancerGenome: not present;CancerHotspot: no;3DHotspot: no	MutationAssessor: impact: medium, score: 2.77;SIFT: impact: deleterious_low_confidence, score: 0.02;Polyphen-2: impact: benign, score: 0.011	Missense_Mutation			NA	NA	dfci.harvard.edu	6	26158577	26158577	G	T							479
Small-Cell Lung Cancer (Multi-Institute 2017)	SCRX-Lu149-R	Small Cell Lung Cancer	I62F	OncoKB: Unknown, level NA;CIViC: NA;MyCancerGenome: not present;CancerHotspot: no;3DHotspot: no	MutationAssessor: impact: high, score: 3.645;SIFT: impact: deleterious_low_confidence, score: 0;Polyphen-2: impact: probably_damaging, score: 0.954	Missense_Mutation		1	NA	NA	mskcc.org	6	26158581	26158581	A	T			31	37			1560
Small-Cell Lung Cancer (Multi-Institute 2017)	SCRX-Lu149	Small Cell Lung Cancer	I62F	OncoKB: Unknown, level NA;CIViC: NA;MyCancerGenome: not present;CancerHotspot: no;3DHotspot: no	MutationAssessor: impact: high, score: 3.645;SIFT: impact: deleterious_low_confidence, score: 0;Polyphen-2: impact: probably_damaging, score: 0.954	Missense_Mutation		1	NA	NA	mskcc.org	6	26158581	26158581	A	T			51	45			1569
Colorectal Adenocarcinoma (TCGA, Provisional)	TCGA-AA-3811-01	Colon Adenocarcinoma	I62N	OncoKB: Unknown, level NA;CIViC: NA;MyCancerGenome: not present;CancerHotspot: no;3DHotspot: no	MutationAssessor: impact: high, score: 4.195;SIFT: impact: deleterious_low_confidence, score: 0;Polyphen-2: impact: probably_damaging, score: 0.999	Missense_Mutation		1	Somatic	Valid	broad.mit.edu	6	26158582	26158582	T	A							807
Prostate Adenocarcinoma (MSKCC/DFCI, Nature Genetics 2018)	12729	Prostate Adenocarcinoma	D69G	OncoKB: Unknown, level NA;CIViC: NA;MyCancerGenome: not present;CancerHotspot: no;3DHotspot: no	MutationAssessor: impact: high, score: 3.975;SIFT: impact: deleterious_low_confidence, score: 0.01;Polyphen-2: impact: benign, score: 0.005	Missense_Mutation			NA	NA	broad.mit.edu	6	26158603	26158603	A	G			72	411			1282
Colorectal Adenocarcinoma (DFCI, Cell Reports 2016)	coadread_dfci_2016_102	Colorectal Adenocarcinoma	D69G	OncoKB: Unknown, level NA;CIViC: NA;MyCancerGenome: not present;CancerHotspot: no;3DHotspot: no	MutationAssessor: impact: high, score: 3.975;SIFT: impact: deleterious_low_confidence, score: 0.01;Polyphen-2: impact: benign, score: 0.005	Missense_Mutation			NA	NA	dfci.harvard.edu	6	26158603	26158603	A	G							1333
MSK-IMPACT Clinical Sequencing Cohort (MSKCC, Nat Med 2017)	P-0010027-T01-IM5	Lung Squamous Cell Carcinoma	D69H	OncoKB: Unknown, level NA;CIViC: NA;MyCancerGenome: not present;CancerHotspot: no;3DHotspot: no	MutationAssessor: impact: high, score: 3.515;SIFT: impact: deleterious_low_confidence, score: 0.01;Polyphen-2: impact: benign, score: 0.084	Missense_Mutation			NA	NA	NA	6	26158602	26158602	G	C				262			13
Head and Neck Squamous Cell Carcinoma (TCGA, Provisional)	TCGA-MT-A51W-01	Head and Neck Squamous Cell Carcinoma	D69H	OncoKB: Unknown, level NA;CIViC: NA;MyCancerGenome: not present;CancerHotspot: no;3DHotspot: no	MutationAssessor: impact: high, score: 3.515;SIFT: impact: deleterious_low_confidence, score: 0.01;Polyphen-2: impact: benign, score: 0.084	Missense_Mutation			Somatic	NA	broad.mit.edu	6	26158602	26158602	G	C			11	184			67
MSK-IMPACT Clinical Sequencing Cohort (MSKCC, Nat Med 2017)	P-0004738-T01-IM5	Colon Adenocarcinoma	I70V	OncoKB: Unknown, level NA;CIViC: NA;MyCancerGenome: not present;CancerHotspot: no;3DHotspot: no	MutationAssessor: impact: medium, score: 2.465;SIFT: impact: tolerated_low_confidence, score: 0.15;Polyphen-2: impact: benign, score: 0.019	Missense_Mutation			NA	NA	NA	6	26158605	26158605	A	G				190			99
Hepatocellular Carcinomas (Inserm, Nat Genet 2015)	CHC1209T	Hepatocellular Carcinoma	F71L	OncoKB: Unknown, level NA;CIViC: NA;MyCancerGenome: not present;CancerHotspot: no;3DHotspot: no	MutationAssessor: impact: medium, score: 2.46;SIFT: impact: deleterious_low_confidence, score: 0.02;Polyphen-2: impact: possibly_damaging, score: 0.744	Missense_Mutation			NA	NA	inserm.fr	6	26158610	26158610	C	A							137
MSK-IMPACT Clinical Sequencing Cohort (MSKCC, Nat Med 2017)	P-0003719-T01-IM5	Bladder Urothelial Carcinoma	F71L	OncoKB: Unknown, level NA;CIViC: NA;MyCancerGenome: not present;CancerHotspot: no;3DHotspot: no	MutationAssessor: impact: medium, score: 2.46;SIFT: impact: deleterious_low_confidence, score: 0.02;Polyphen-2: impact: benign, score: 0.049	Missense_Mutation			NA	NA	NA	6	26158610	26158610	C	G				139			49
Kidney Chromophobe (TCGA, Provisional)	TCGA-KN-8427-01	Chromophobe Renal Cell Carcinoma	E72Q	OncoKB: Unknown, level NA;CIViC: NA;MyCancerGenome: not present;CancerHotspot: no;3DHotspot: no	MutationAssessor: impact: medium, score: 3.16;SIFT: impact: deleterious_low_confidence, score: 0.02;Polyphen-2: impact: benign, score: 0.02	Missense_Mutation		1	Somatic	Untested	broad.mit.edu	6	26158611	26158611	G	C							104
Head and Neck Squamous Cell Carcinoma (TCGA, Provisional)	TCGA-HD-A633-01	Head and Neck Squamous Cell Carcinoma	I74M	OncoKB: Unknown, level NA;CIViC: NA;MyCancerGenome: not present;CancerHotspot: no;3DHotspot: no	MutationAssessor: impact: medium, score: 2.785;SIFT: impact: deleterious_low_confidence, score: 0.01;Polyphen-2: impact: benign, score: 0.227	Missense_Mutation			Somatic	NA	broad.mit.edu	6	26158619	26158619	C	G			80	168			130
Colorectal Adenocarcinoma (DFCI, Cell Reports 2016)	coadread_dfci_2016_1849	Colorectal Adenocarcinoma	I74N	OncoKB: Unknown, level NA;CIViC: NA;MyCancerGenome: not present;CancerHotspot: no;3DHotspot: no	MutationAssessor: impact: high, score: 3.82;SIFT: impact: deleterious_low_confidence, score: 0.02;Polyphen-2: impact: possibly_damaging, score: 0.759	Missense_Mutation			NA	NA	dfci.harvard.edu	6	26158618	26158618	T	A							1792
Breast Invasive Carcinoma (Sanger, Nature 2012)	PD4120a	Invasive Breast Carcinoma	E77K	OncoKB: Unknown, level NA;CIViC: NA;MyCancerGenome: not present;CancerHotspot: no;3DHotspot: no	MutationAssessor: impact: medium, score: 3.065;SIFT: impact: deleterious_low_confidence, score: 0.04;Polyphen-2: impact: benign, score: 0.346	Missense_Mutation		5	Unknown	Unknown	Sanger	6	26158626	26158626	G	A							454
MSK-IMPACT Clinical Sequencing Cohort (MSKCC, Nat Med 2017)	P-0000908-T01-IM3	Bladder Urothelial Carcinoma	E77K	OncoKB: Unknown, level NA;CIViC: NA;MyCancerGenome: not present;CancerHotspot: no;3DHotspot: no	MutationAssessor: impact: medium, score: 3.065;SIFT: impact: deleterious_low_confidence, score: 0.04;Polyphen-2: impact: benign, score: 0.346	Missense_Mutation		5	NA	NA	NA	6	26158626	26158626	G	A				145			29
MSK-IMPACT Clinical Sequencing Cohort (MSKCC, Nat Med 2017)	P-0004226-T01-IM5	Bladder Urothelial Carcinoma	E77K	OncoKB: Unknown, level NA;CIViC: NA;MyCancerGenome: not present;CancerHotspot: no;3DHotspot: no	MutationAssessor: impact: medium, score: 3.065;SIFT: impact: deleterious_low_confidence, score: 0.04;Polyphen-2: impact: benign, score: 0.346	Missense_Mutation		5	NA	NA	NA	6	26158626	26158626	G	A				144			7
Bladder Urothelial Carcinoma (Dana Farber & MSKCC, Cancer Discov 2014)	MSKCC-0411_R	Bladder Urothelial Carcinoma	E77K	OncoKB: Unknown, level NA;CIViC: NA;MyCancerGenome: not present;CancerHotspot: no;3DHotspot: no	MutationAssessor: impact: medium, score: 3.065;SIFT: impact: deleterious_low_confidence, score: 0.04;Polyphen-2: impact: benign, score: 0.346	Missense_Mutation		5	NA	NA	NA	6	26158626	26158626	G	A							462
Pan-Lung Cancer (TCGA, Nat Genet 2016)	TCGA-66-2773-01	Lung Squamous Cell Carcinoma	E77Q	OncoKB: Unknown, level NA;CIViC: NA;MyCancerGenome: not present;CancerHotspot: no;3DHotspot: no	MutationAssessor: impact: high, score: 3.615;SIFT: impact: deleterious_low_confidence, score: 0;Polyphen-2: impact: possibly_damaging, score: 0.853	Missense_Mutation		5	Somatic	NA	broad.mit.edu	6	26158626	26158626	G	C			99	460		540	511
MSK-IMPACT Clinical Sequencing Cohort (MSKCC, Nat Med 2017)	P-0002178-T01-IM3	Lung Squamous Cell Carcinoma	E77Q	OncoKB: Unknown, level NA;CIViC: NA;MyCancerGenome: not present;CancerHotspot: no;3DHotspot: no	MutationAssessor: impact: high, score: 3.615;SIFT: impact: deleterious_low_confidence, score: 0;Polyphen-2: impact: possibly_damaging, score: 0.853	Missense_Mutation		5	NA	NA	NA	6	26158626	26158626	G	C				339			13
Breast Invasive Carcinoma (TCGA, Provisional)	TCGA-OL-A5RW-01	Breast Invasive Ductal Carcinoma	E77Q	OncoKB: Unknown, level NA;CIViC: NA;MyCancerGenome: not present;CancerHotspot: no;3DHotspot: no	MutationAssessor: impact: high, score: 3.615;SIFT: impact: deleterious_low_confidence, score: 0;Polyphen-2: impact: possibly_damaging, score: 0.853	Missense_Mutation		5	Somatic	Untested	genome.wustl.edu	6	26158626	26158626	G	C			150	66			120
MSK-IMPACT Clinical Sequencing Cohort (MSKCC, Nat Med 2017)	P-0010427-T01-IM5	Breast Invasive Ductal Carcinoma	S79F	OncoKB: Unknown, level NA;CIViC: NA;MyCancerGenome: not present;CancerHotspot: no;3DHotspot: no	MutationAssessor: impact: high, score: 3.89;SIFT: impact: deleterious_low_confidence, score: 0;Polyphen-2: impact: possibly_damaging, score: 0.879	Missense_Mutation			NA	NA	NA	6	26158633	26158633	C	T				120			4
MSK-IMPACT Clinical Sequencing Cohort (MSKCC, Nat Med 2017)	P-0006201-T01-IM5	Uterine Endometrioid Carcinoma	Y84H	OncoKB: Unknown, level NA;CIViC: NA;MyCancerGenome: not present;CancerHotspot: no;3DHotspot: no	MutationAssessor: impact: medium, score: 3.105;SIFT: impact: deleterious_low_confidence, score: 0.01;Polyphen-2: impact: possibly_damaging, score: 0.632	Missense_Mutation			NA	NA	NA	6	26158647	26158647	T	C				90			52
MSK-IMPACT Clinical Sequencing Cohort (MSKCC, Nat Med 2017)	P-0005326-T01-IM5	Colon Adenocarcinoma	K86R	OncoKB: Unknown, level NA;CIViC: NA;MyCancerGenome: not present;CancerHotspot: no;3DHotspot: no	MutationAssessor: impact: medium, score: 2.82;SIFT: impact: deleterious_low_confidence, score: 0.05;Polyphen-2: impact: benign, score: 0.096	Missense_Mutation			NA	NA	NA	6	26158654	26158654	A	G				90			82
MSK-IMPACT Clinical Sequencing Cohort (MSKCC, Nat Med 2017)	P-0003972-T01-IM5	Sarcomatoid Carcinoma of the Lung	S88W	OncoKB: Unknown, level NA;CIViC: NA;MyCancerGenome: not present;CancerHotspot: no;3DHotspot: no	MutationAssessor: impact: medium, score: 2.995;SIFT: impact: deleterious_low_confidence, score: 0.01;Polyphen-2: impact: benign, score: 0.009	Missense_Mutation		2	NA	NA	NA	6	26158660	26158660	C	G				27			6
MSK-IMPACT Clinical Sequencing Cohort (MSKCC, Nat Med 2017)	P-0002463-T01-IM3	Colon Adenocarcinoma	T89A	OncoKB: Unknown, level NA;CIViC: NA;MyCancerGenome: not present;CancerHotspot: no;3DHotspot: no	MutationAssessor: impact: high, score: 3.995;SIFT: impact: deleterious_low_confidence, score: 0.01;Polyphen-2: impact: possibly_damaging, score: 0.502	Missense_Mutation			NA	NA	NA	6	26158662	26158662	A	G				58			57
MSK-IMPACT Clinical Sequencing Cohort (MSKCC, Nat Med 2017)	P-0002463-T02-IM5	Colon Adenocarcinoma	T89A	OncoKB: Unknown, level NA;CIViC: NA;MyCancerGenome: not present;CancerHotspot: no;3DHotspot: no	MutationAssessor: impact: high, score: 3.995;SIFT: impact: deleterious_low_confidence, score: 0.01;Polyphen-2: impact: possibly_damaging, score: 0.502	Missense_Mutation			NA	NA	NA	6	26158662	26158662	A	G				30			55
Mutational profiles of metastatic breast cancer (France, 2016)	MBC_194	Invasive Breast Carcinoma	T89A	OncoKB: Unknown, level NA;CIViC: NA;MyCancerGenome: not present;CancerHotspot: no;3DHotspot: no	MutationAssessor: impact: high, score: 3.995;SIFT: impact: deleterious_low_confidence, score: 0.01;Polyphen-2: impact: possibly_damaging, score: 0.502	Missense_Mutation			Somatic	NA	GR	6	26158662	26158662	A	G			11	63		46	68
MSK-IMPACT Clinical Sequencing Cohort (MSKCC, Nat Med 2017)	P-0006822-T01-IM5	Colon Adenocarcinoma	T89S	OncoKB: Unknown, level NA;CIViC: NA;MyCancerGenome: not present;CancerHotspot: no;3DHotspot: no	MutationAssessor: impact: high, score: 4.345;SIFT: impact: deleterious_low_confidence, score: 0;Polyphen-2: impact: benign, score: 0.129	Missense_Mutation			NA	NA	NA	6	26158663	26158663	C	G				61			7
Thyroid Carcinoma (TCGA, Provisional)	TCGA-EM-A1CT-01	Papillary Thyroid Cancer	S92P	OncoKB: Unknown, level NA;CIViC: NA;MyCancerGenome: not present;CancerHotspot: no;3DHotspot: no	MutationAssessor: impact: medium, score: 2.565;SIFT: impact: deleterious_low_confidence, score: 0.01;Polyphen-2: impact: benign, score: 0.073	Missense_Mutation		1	Somatic	NA	broad.mit.edu	6	26158671	26158671	T	C			62	86			15
Uterine Corpus Endometrial Carcinoma (TCGA, Provisional)	TCGA-B5-A11U-01	Uterine Endometrioid Carcinoma	E94D	OncoKB: Unknown, level NA;CIViC: NA;MyCancerGenome: not present;CancerHotspot: no;3DHotspot: no	MutationAssessor: impact: medium, score: 2.515;SIFT: impact: deleterious_low_confidence, score: 0.02;Polyphen-2: impact: benign, score: 0.304	Missense_Mutation		1	Somatic	Untested	genome.wustl.edu	6	26158679	26158679	G	T			45	91		164	229
Uterine Corpus Endometrial Carcinoma (TCGA, Provisional)	TCGA-D1-A0ZV-01	Uterine Endometrioid Carcinoma	I95V	OncoKB: Unknown, level NA;CIViC: NA;MyCancerGenome: not present;CancerHotspot: no;3DHotspot: no	MutationAssessor: impact: low, score: 1.885;SIFT: impact: tolerated_low_confidence, score: 0.1;Polyphen-2: impact: benign, score: 0.014	Missense_Mutation		1	Somatic	Untested	genome.wustl.edu	6	26158680	26158680	A	G			48	98		126	35
MSK-IMPACT Clinical Sequencing Cohort (MSKCC, Nat Med 2017)	P-0007015-T01-IM5	Bladder Urothelial Carcinoma	Q96H	OncoKB: Unknown, level NA;CIViC: NA;MyCancerGenome: not present;CancerHotspot: no;3DHotspot: no	MutationAssessor: impact: high, score: 3.61;SIFT: impact: deleterious_low_confidence, score: 0.01;Polyphen-2: impact: benign, score: 0.285	Missense_Mutation			NA	NA	NA	6	26158685	26158685	G	T				53			16
Prostate Adenocarcinoma (MSKCC/DFCI, Nature Genetics 2018)	PR-3127	Prostate Adenocarcinoma	V99E	OncoKB: Unknown, level NA;CIViC: NA;MyCancerGenome: not present;CancerHotspot: no;3DHotspot: no	MutationAssessor: impact: high, score: 3.905;SIFT: impact: deleterious_low_confidence, score: 0;Polyphen-2: impact: benign, score: 0.056	Missense_Mutation		1	NA	NA	broad.mit.edu	6	26158693	26158693	T	A			8	263			22
Oral Squamous Cell Carcinoma (MD Anderson, Cancer Discov 2013)	OSCJM-PT01-166-T	Head and Neck Squamous Cell Carcinoma	V99L	OncoKB: Unknown, level NA;CIViC: NA;MyCancerGenome: not present;CancerHotspot: no;3DHotspot: no	MutationAssessor: impact: medium, score: 3.445;SIFT: impact: tolerated_low_confidence, score: 0.05;Polyphen-2: impact: benign, score: 0.005	Missense_Mutation		1	Somatic	Unknown	hgsc.bcm.edu	6	26158692	26158692	G	C							109
Head and Neck Squamous Cell Carcinoma (TCGA, Provisional)	TCGA-CV-6436-01	Head and Neck Squamous Cell Carcinoma	V99L	OncoKB: Unknown, level NA;CIViC: NA;MyCancerGenome: not present;CancerHotspot: no;3DHotspot: no	MutationAssessor: impact: medium, score: 3.445;SIFT: impact: tolerated_low_confidence, score: 0.05;Polyphen-2: impact: benign, score: 0.005	Missense_Mutation		1	Somatic	NA	broad.mit.edu	6	26158692	26158692	G	C			20	94			73
MSK-IMPACT Clinical Sequencing Cohort (MSKCC, Nat Med 2017)	P-0007029-T01-IM5	Lung Adenocarcinoma	V99M	OncoKB: Unknown, level NA;CIViC: NA;MyCancerGenome: not present;CancerHotspot: no;3DHotspot: no	MutationAssessor: impact: medium, score: 3.445;SIFT: impact: tolerated_low_confidence, score: 0.07;Polyphen-2: impact: benign, score: 0.059	Missense_Mutation		1	NA	NA	NA	6	26158692	26158692	G	A				83			14
MSK-IMPACT Clinical Sequencing Cohort (MSKCC, Nat Med 2017)	P-0010267-T01-IM5	Lung Adenocarcinoma	R100L	OncoKB: Unknown, level NA;CIViC: NA;MyCancerGenome: not present;CancerHotspot: no;3DHotspot: no	MutationAssessor: impact: high, score: 3.675;SIFT: impact: deleterious_low_confidence, score: 0.04;Polyphen-2: impact: benign, score: 0.029	Missense_Mutation			NA	NA	NA	6	26158696	26158696	G	T				72			7
Pan-Lung Cancer (TCGA, Nat Genet 2016)	TCGA-62-A472-01	Lung Adenocarcinoma	G105R	OncoKB: Unknown, level NA;CIViC: NA;MyCancerGenome: not present;CancerHotspot: no;3DHotspot: no		Missense_Mutation			Somatic	NA	broad.mit.edu	6	26158709	26158710	GG	TC			31	46		177	52
MSK-IMPACT Clinical Sequencing Cohort (MSKCC, Nat Med 2017)	P-0004754-T01-IM5	Colon Adenocarcinoma	E106G	OncoKB: Unknown, level NA;CIViC: NA;MyCancerGenome: not present;CancerHotspot: no;3DHotspot: no	MutationAssessor: impact: high, score: 3.955;SIFT: impact: deleterious_low_confidence, score: 0.01;Polyphen-2: impact: benign, score: 0.017	Missense_Mutation			NA	NA	NA	6	26158714	26158714	A	G				179			81
MSK-IMPACT Clinical Sequencing Cohort (MSKCC, Nat Med 2017)	P-0002181-T02-IM5	Glioblastoma Multiforme	E106K	OncoKB: Unknown, level NA;CIViC: NA;MyCancerGenome: not present;CancerHotspot: no;3DHotspot: no	MutationAssessor: impact: medium, score: 2.915;SIFT: impact: deleterious_low_confidence, score: 0.01;Polyphen-2: impact: benign, score: 0.111	Missense_Mutation			NA	NA	NA	6	26158713	26158713	G	A				273			61
MSK-IMPACT Clinical Sequencing Cohort for Non-Small Cell Cancer (MSK, Cancer Discovery 2017)	P-0002163-T01-IM3	Lung Adenocarcinoma	A108P	OncoKB: Unknown, level NA;CIViC: NA;MyCancerGenome: not present;CancerHotspot: no;3DHotspot: no	MutationAssessor: impact: high, score: 4.115;SIFT: impact: deleterious_low_confidence, score: 0;Polyphen-2: impact: benign, score: 0.046	Missense_Mutation			SOMATIC	NA	MSKCC	6	26158719	26158719	G	C							24
MSK-IMPACT Clinical Sequencing Cohort for Non-Small Cell Cancer (MSK, Cancer Discovery 2017)	P-0009924-T01-IM5	Lung Adenocarcinoma	A108S	OncoKB: Unknown, level NA;CIViC: NA;MyCancerGenome: not present;CancerHotspot: no;3DHotspot: no	MutationAssessor: impact: low, score: 1.5;SIFT: impact: deleterious_low_confidence, score: 0.03;Polyphen-2: impact: benign, score: 0.133	Missense_Mutation			SOMATIC	NA	MSKCC	6	26158719	26158719	G	T							18
Bladder Urothelial Carcinoma (Dana Farber & MSKCC, Cancer Discov 2014)	DFCI-04_R	Bladder Urothelial Carcinoma	G115D	OncoKB: Unknown, level NA;CIViC: NA;MyCancerGenome: not present;CancerHotspot: no;3DHotspot: no	MutationAssessor: impact: high, score: 4;SIFT: impact: deleterious_low_confidence, score: 0.01;Polyphen-2: impact: possibly_damaging, score: 0.806	Missense_Mutation			NA	NA	NA	6	26158741	26158741	G	A							365
Bladder Cancer (TCGA, Cell 2017)	TCGA-XF-A9ST-01	Bladder Urothelial Carcinoma	T116S	OncoKB: Unknown, level NA;CIViC: NA;MyCancerGenome: not present;CancerHotspot: no;3DHotspot: no	MutationAssessor: impact: medium, score: 2.49;SIFT: impact: deleterious_low_confidence, score: 0.01;Polyphen-2: impact: benign, score: 0.114	Missense_Mutation			Somatic	NaN	broad.mit.edu	6	26158743	26158743	A	T				60			523
TCGA data for Esophagus-Stomach Cancers (TCGA, Nature 2017)	TCGA-BR-4361-01	Stomach Adenocarcinoma	V119D	OncoKB: Unknown, level NA;CIViC: NA;MyCancerGenome: not present;CancerHotspot: no;3DHotspot: no	MutationAssessor: impact: high, score: 4.26;SIFT: impact: deleterious_low_confidence, score: 0;Polyphen-2: impact: possibly_damaging, score: 0.615	Missense_Mutation		1	Somatic	Untested	genome.wustl.edu	6	26158753	26158753	T	A			17	85		193	2463
Head and Neck Squamous Cell Carcinoma (TCGA, Provisional)	TCGA-CV-7248-01	Head and Neck Squamous Cell Carcinoma	V119F	OncoKB: Unknown, level NA;CIViC: NA;MyCancerGenome: not present;CancerHotspot: no;3DHotspot: no	MutationAssessor: impact: high, score: 3.57;SIFT: impact: deleterious_low_confidence, score: 0;Polyphen-2: impact: possibly_damaging, score: 0.744	Missense_Mutation		1	Somatic	NA	broad.mit.edu	6	26158752	26158752	G	T			23	68			262
Ampullary Carcinoma (Baylor College of Medicine, Cell Reports 2016)	DUOAC_781	Ampulla of Vater	V119I	OncoKB: Unknown, level NA;CIViC: NA;MyCancerGenome: not present;CancerHotspot: no;3DHotspot: no	MutationAssessor: impact: medium, score: 2.595;SIFT: impact: deleterious_low_confidence, score: 0.04;Polyphen-2: impact: benign, score: 0.005	Missense_Mutation		1	Somatic	Untested	Baylor College of Medicine	6	26158752	26158752	G	A			62	180		136	1739
TCGA data for Esophagus-Stomach Cancers (TCGA, Nature 2017)	TCGA-HU-A4G8-01	Stomach Adenocarcinoma	Y122C	OncoKB: Unknown, level NA;CIViC: NA;MyCancerGenome: not present;CancerHotspot: no;3DHotspot: no	MutationAssessor: impact: high, score: 4.085;SIFT: impact: deleterious_low_confidence, score: 0.01;Polyphen-2: impact: benign, score: 0.01	Missense_Mutation		2	Somatic	Untested	genome.wustl.edu	6	26158762	26158762	A	G			33	96		115	1525
Colon Adenocarcinoma (TCGA, PanCancer Atlas)	TCGA-CM-4746-01	Colon Adenocarcinoma	Y122H	OncoKB: Unknown, level NA;CIViC: NA;MyCancerGenome: not present;CancerHotspot: no;3DHotspot: no	MutationAssessor: impact: high, score: 3.74;SIFT: impact: deleterious_low_confidence, score: 0.03;Polyphen-2: impact: benign, score: 0.057	Missense_Mutation		2	.	.	.	6	26158761	26158761	T	C			43	77		117	717
Liver Hepatocellular Carcinoma (AMC, Hepatology 2014)	H060607	Hepatocellular Adenoma	T123S	OncoKB: Unknown, level NA;CIViC: NA;MyCancerGenome: not present;CancerHotspot: no;3DHotspot: no	MutationAssessor: impact: low, score: 1.415;SIFT: impact: tolerated_low_confidence, score: 0.08;Polyphen-2: impact: benign, score: 0.009	Missense_Mutation		1	Somatic	Unknown	LGGM	6	26158764	26158764	A	T				36			170
Non-Hodgkin Lymphoma (BCGSC, Nature 2011)	DLBCL-PatientK	Activated B-cell Type	S124N	OncoKB: Unknown, level NA;CIViC: NA;MyCancerGenome: not present;CancerHotspot: no;3DHotspot: no	MutationAssessor: impact: medium, score: 2.64;SIFT: impact: deleterious_low_confidence, score: 0.02;Polyphen-2: impact: benign, score: 0.007	Missense_Mutation		1	Somatic	Valid	NA	6	26158768	26158768	G	A							58
Diffuse Large B-cell Lymphoma (BCGSC, Blood 2013)	RG027	Activated B-cell Type	S124N	OncoKB: Unknown, level NA;CIViC: NA;MyCancerGenome: not present;CancerHotspot: no;3DHotspot: no	MutationAssessor: impact: medium, score: 2.64;SIFT: impact: deleterious_low_confidence, score: 0.02;Polyphen-2: impact: benign, score: 0.007	Missense_Mutation		1	somatic	NA	NA	6	26158768	26158768	G	A							57
Pan-Lung Cancer (TCGA, Nat Genet 2016)	TCGA-22-1002-01	Lung Squamous Cell Carcinoma	K126N	OncoKB: Unknown, level NA;CIViC: NA;MyCancerGenome: not present;CancerHotspot: no;3DHotspot: no	MutationAssessor: impact: medium, score: 2.765;SIFT: impact: deleterious_low_confidence, score: 0;Polyphen-2: impact: possibly_damaging, score: 0.712	Missense_Mutation		1	Somatic	NA	broad.mit.edu	6	26158775	26158775	G	C			19	134		163	212
Ovarian Serous Cystadenocarcinoma (TCGA, PanCancer Atlas)	TCGA-20-1684-01	Serous Ovarian Cancer	E3Q	OncoKB: Predicted Oncogenic, level NA;CIViC: NA;MyCancerGenome: not present;CancerHotspot: no;3DHotspot: yes	MutationAssessor: impact: medium, score: 2.765;SIFT: impact: deleterious_low_confidence, score: 0.05;Polyphen-2: impact: possibly_damaging, score: 0.653	Missense_Mutation	diploid	2	.	.	.	6	26158404	26158404	G	C	0.24		37	115		113	36	2019-01-02	ENST00000289316.2:c.7G>C
Uterine Corpus Endometrial Carcinoma (TCGA, PanCancer Atlas)	TCGA-AX-A06F-01	Uterine Endometrioid Carcinoma	K12Q	OncoKB: Unknown, level NA;CIViC: NA;MyCancerGenome: not present;CancerHotspot: no;3DHotspot: no	MutationAssessor: impact: medium, score: 2.655;SIFT: impact: deleterious_low_confidence, score: 0.02;Polyphen-2: impact: benign, score: 0.061	Missense_Mutation	diploid		.	.	.	6	26158431	26158431	A	C	0.45		43	53		106	7289	2019-01-02	ENST00000289316.2:c.34A>C
MSS Mixed Solid Tumors (Broad/Dana-Farber, Nat Genet 2018)	BLCA-011-Tumor-SM-CUCGL	Bladder Urothelial Carcinoma	R30G	OncoKB: Unknown, level NA;CIViC: NA;MyCancerGenome: not present;CancerHotspot: no;3DHotspot: no	MutationAssessor: impact: medium, score: 2.565;SIFT: impact: deleterious_low_confidence, score: 0;Polyphen-2: impact: benign, score: 0.056	Missense_Mutation			NA	NA	NA	6	26158485	26158485	C	G	0.05		12	240			329	2019-01-02	ENST00000289316.2:c.88C>G
Bladder Urothelial Carcinoma (TCGA, PanCancer Atlas)	TCGA-DK-A2I1-01	Bladder Urothelial Carcinoma	E36D	OncoKB: Unknown, level NA;CIViC: NA;MyCancerGenome: not present;CancerHotspot: no;3DHotspot: no	MutationAssessor: impact: medium, score: 2.245;SIFT: impact: deleterious_low_confidence, score: 0.02;Polyphen-2: impact: benign, score: 0.006	Missense_Mutation	gain		.	.	.	6	26158505	26158505	G	C	0.17		47	236		333	709	2019-01-02	ENST00000289316.2:c.108G>C
Stomach Adenocarcinoma (TCGA, PanCancer Atlas)	TCGA-VQ-A8PP-01	Tubular Stomach Adenocarcinoma	V42A	OncoKB: Unknown, level NA;CIViC: NA;MyCancerGenome: not present;CancerHotspot: no;3DHotspot: no	MutationAssessor: impact: medium, score: 2.19;SIFT: impact: deleterious_low_confidence, score: 0;Polyphen-2: impact: benign, score: 0.315	Missense_Mutation	diploid		.	.	.	6	26158522	26158522	T	C	0.19		34	148		200	1328	2019-01-02	ENST00000289316.2:c.125T>C
Uterine Corpus Endometrial Carcinoma (TCGA, PanCancer Atlas)	TCGA-B5-A1MX-01	Uterine Endometrioid Carcinoma	H50Y	OncoKB: Unknown, level NA;CIViC: NA;MyCancerGenome: not present;CancerHotspot: no;3DHotspot: no	MutationAssessor: impact: medium, score: 3.425;SIFT: impact: deleterious_low_confidence, score: 0.02;Polyphen-2: impact: probably_damaging, score: 0.997	Missense_Mutation	diploid		.	.	.	6	26158545	26158545	C	T	0.13		12	77		125	5699	2019-01-02	ENST00000289316.2:c.148C>T
MSS Mixed Solid Tumors (Broad/Dana-Farber, Nat Genet 2018)	DFCI_11-104_011-Tumor-SM-5PA3E	Bladder Urothelial Carcinoma	D69H	OncoKB: Unknown, level NA;CIViC: NA;MyCancerGenome: not present;CancerHotspot: no;3DHotspot: no	MutationAssessor: impact: high, score: 3.515;SIFT: impact: deleterious_low_confidence, score: 0.01;Polyphen-2: impact: benign, score: 0.084	Missense_Mutation			NA	NA	NA	6	26158602	26158602	G	C	0.1		36	331			505	2019-01-02	ENST00000289316.2:c.205G>C
Bladder Urothelial Carcinoma (TCGA, PanCancer Atlas)	TCGA-DK-A1AC-01	Bladder Urothelial Carcinoma	E77K	OncoKB: Unknown, level NA;CIViC: NA;MyCancerGenome: not present;CancerHotspot: no;3DHotspot: no	MutationAssessor: impact: medium, score: 3.065;SIFT: impact: deleterious_low_confidence, score: 0.04;Polyphen-2: impact: benign, score: 0.346	Missense_Mutation	diploid	5	.	.	.	6	26158626	26158626	G	A	0.32		50	108		303	1294	2019-01-02	ENST00000289316.2:c.229G>A
Stomach Adenocarcinoma (TCGA, PanCancer Atlas)	TCGA-VQ-A925-01	Tubular Stomach Adenocarcinoma	G105W	OncoKB: Unknown, level NA;CIViC: NA;MyCancerGenome: not present;CancerHotspot: no;3DHotspot: no	MutationAssessor: impact: high, score: 4.33;SIFT: impact: deleterious_low_confidence, score: 0;Polyphen-2: impact: probably_damaging, score: 0.995	Missense_Mutation	gain		.	.	.	6	26158710	26158710	G	T	0.12		13	95		107	109	2019-01-02	ENST00000289316.2:c.313G>T
Bladder Urothelial Carcinoma (TCGA, PanCancer Atlas)	TCGA-XF-AAMG-01	Bladder Urothelial Carcinoma	A108T	OncoKB: Unknown, level NA;CIViC: NA;MyCancerGenome: not present;CancerHotspot: no;3DHotspot: no	MutationAssessor: impact: high, score: 4.115;SIFT: impact: deleterious_low_confidence, score: 0.01;Polyphen-2: impact: benign, score: 0.034	Missense_Mutation	amp		.	.	.	6	26158719	26158719	G	A	0.07		17	212		95	894	2019-01-02	ENST00000289316.2:c.322G>A
Uterine Corpus Endometrial Carcinoma (TCGA, PanCancer Atlas)	TCGA-BG-A0M4-01	Uterine Endometrioid Carcinoma	T123A	OncoKB: Unknown, level NA;CIViC: NA;MyCancerGenome: not present;CancerHotspot: no;3DHotspot: no	MutationAssessor: impact: medium, score: 2.28;SIFT: impact: deleterious_low_confidence, score: 0.02;Polyphen-2: impact: benign, score: 0.003	Missense_Mutation	diploid	1	.	.	.	6	26158764	26158764	A	G	0.07		6	80		90	579	2019-01-02	ENST00000289316.2:c.367A>G

## Sheet: HIST1H2BE
Study	Sample ID	Cancer Type	Protein Change	Annotation	Functional Impact	Mutation Type	Copy #	COSMIC	MS	VS	Center	Chromosome	Start Pos	End Pos	Ref	Var	Allele Freq (T)	Allele Freq (N)	Variant Reads	Ref Reads	Variant Reads (N)	Ref Reads (N)	# Mut in Sample
Colon Adenocarcinoma (TCGA, PanCancer Atlas)	TCGA-AA-A01P-01	Colon Adenocarcinoma	A8T	OncoKB: NA;CIViC: NA;MyCancerGenome: not present;CancerHotspot: no;3DHotspot: no	MutationAssessor: Error;SIFT: impact: undefined, score: undefined;Polyphen-2: impact: undefined, score: undefined	Missense_Mutation			.	.	.	6	26184045	26184045	G	A			37	133		179	850
Cutaneous Squamous Cell Carcinoma (MD Anderson, Clin Cancer Res 2014)	CSCC-16-T	Cutaneous Squamous Cell Carcinoma	P9L	OncoKB: NA;CIViC: NA;MyCancerGenome: not present;CancerHotspot: no;3DHotspot: no	MutationAssessor: Error;SIFT: impact: undefined, score: undefined;Polyphen-2: impact: undefined, score: undefined	Missense_Mutation			Somatic	Untested	hgsc.bcm.edu	6	26184049	26184049	C	T			30	132		121	2404
Skin Cutaneous Melanoma (TCGA, Provisional)	TCGA-EE-A2GR-06	Cutaneous Melanoma	P11S	OncoKB: NA;CIViC: NA;MyCancerGenome: not present;CancerHotspot: no;3DHotspot: no	MutationAssessor: Error;SIFT: impact: undefined, score: undefined;Polyphen-2: impact: undefined, score: undefined	Missense_Mutation		1	Somatic	NA	broad.mit.edu	6	26184054	26184054	C	T			21	67			1323
Skin Cutaneous Melanoma(Broad, Cancer Discov 2014)	Pat_46_Post	Melanoma	P11S	OncoKB: NA;CIViC: NA;MyCancerGenome: not present;CancerHotspot: no;3DHotspot: no	MutationAssessor: Error;SIFT: impact: undefined, score: undefined;Polyphen-2: impact: undefined, score: undefined	Missense_Mutation		1	NA	NA	broad.mit.edu	6	26184054	26184054	C	T			11	61			603
Skin Cutaneous Melanoma(Broad, Cancer Discov 2014)	Pat_46_Pre	Melanoma	P11S	OncoKB: NA;CIViC: NA;MyCancerGenome: not present;CancerHotspot: no;3DHotspot: no	MutationAssessor: Error;SIFT: impact: undefined, score: undefined;Polyphen-2: impact: undefined, score: undefined	Missense_Mutation		1	NA	NA	broad.mit.edu	6	26184054	26184054	C	T			41	135			771
Breast Invasive Carcinoma (TCGA, Provisional)	TCGA-BH-A0HF-01	Breast Invasive Ductal Carcinoma	K13R	OncoKB: NA;CIViC: NA;MyCancerGenome: not present;CancerHotspot: no;3DHotspot: no	MutationAssessor: Error;SIFT: impact: undefined, score: undefined;Polyphen-2: impact: undefined, score: undefined	Missense_Mutation		1	Somatic	Untested	genome.wustl.edu	6	26184061	26184061	A	G			149	143			552
Prostate Adenocarcinoma (TCGA, Provisional)	TCGA-HC-8216-01	Prostate Adenocarcinoma	V19M	OncoKB: NA;CIViC: NA;MyCancerGenome: not present;CancerHotspot: no;3DHotspot: no	MutationAssessor: Error;SIFT: impact: undefined, score: undefined;Polyphen-2: impact: undefined, score: undefined	Missense_Mutation		1	Somatic	NA	broad.mit.edu	6	26184078	26184078	G	A			4	150			115
Lymphoid Neoplasm Diffuse Large B-cell Lymphoma (TCGA, Provisional)	TCGA-G8-6324-01	Diffuse Large B-Cell Lymphoma	T20S	OncoKB: NA;CIViC: NA;MyCancerGenome: not present;CancerHotspot: no;3DHotspot: no	MutationAssessor: Error;SIFT: impact: undefined, score: undefined;Polyphen-2: impact: undefined, score: undefined	Missense_Mutation			Somatic	Untested	hgsc.bcm.edu	6	26184082	26184082	C	G			105	108		225	2454
Colon Adenocarcinoma (TCGA, PanCancer Atlas)	TCGA-AA-3715-01	Colon Adenocarcinoma	E36A	OncoKB: NA;CIViC: NA;MyCancerGenome: not present;CancerHotspot: no;3DHotspot: no	MutationAssessor: Error;SIFT: impact: undefined, score: undefined;Polyphen-2: impact: undefined, score: undefined	Missense_Mutation			.	.	.	6	26184130	26184130	A	C			19	292		133	2121
Small Cell Lung Cancer (U Cologne, Nature 2015)	S02286	Small Cell Lung Cancer	Y43F	OncoKB: NA;CIViC: NA;MyCancerGenome: not present;CancerHotspot: no;3DHotspot: no	MutationAssessor: Error;SIFT: impact: undefined, score: undefined;Polyphen-2: impact: undefined, score: undefined	Missense_Mutation			NA	NA	ucologne	6	26184151	26184151	A	T							272
Chronic Lymphocytic Leukemia (IUOPA, Nature 2015)	cll_iuopa_2015_373	Chronic Lymphocytic Leukemia	V49A	OncoKB: NA;CIViC: NA;MyCancerGenome: not present;CancerHotspot: no;3DHotspot: no	MutationAssessor: Error;SIFT: impact: undefined, score: undefined;Polyphen-2: impact: undefined, score: undefined	Missense_Mutation			NA	NA	www.unioviedo.es/IUOPA/	6	26184169	26184169	T	C							17
Pan-Lung Cancer (TCGA, Nat Genet 2016)	TCGA-MN-A4N4-01	Lung Adenocarcinoma	D52Y	OncoKB: NA;CIViC: NA;MyCancerGenome: not present;CancerHotspot: no;3DHotspot: no	MutationAssessor: Error;SIFT: impact: undefined, score: undefined;Polyphen-2: impact: undefined, score: undefined	Missense_Mutation			Somatic	NA	broad.mit.edu	6	26184177	26184177	G	T			18	197		289	1308
Glioblastoma Multiforme (TCGA, Provisional)	TCGA-06-0190-02	Glioblastoma Multiforme	G54D	OncoKB: NA;CIViC: NA;MyCancerGenome: not present;CancerHotspot: no;3DHotspot: no	MutationAssessor: Error;SIFT: impact: undefined, score: undefined;Polyphen-2: impact: undefined, score: undefined	Missense_Mutation		1	Somatic	Untested	broad.mit.edu	6	26184184	26184184	G	A							66
Pan-Lung Cancer (TCGA, Nat Genet 2016)	TCGA-49-AARN-01	Lung Adenocarcinoma	S57F	OncoKB: NA;CIViC: NA;MyCancerGenome: not present;CancerHotspot: no;3DHotspot: no	MutationAssessor: Error;SIFT: impact: undefined, score: undefined;Polyphen-2: impact: undefined, score: undefined	Missense_Mutation			Somatic	NA	broad.mit.edu	6	26184193	26184193	C	T			4	157		194	997
Colorectal Adenocarcinoma (TCGA, Provisional)	TCGA-AA-3821-01	Mucinous Adenocarcinoma of the Colon and Rectum	M60T	OncoKB: NA;CIViC: NA;MyCancerGenome: not present;CancerHotspot: no;3DHotspot: no	MutationAssessor: Error;SIFT: impact: undefined, score: undefined;Polyphen-2: impact: undefined, score: undefined	Missense_Mutation		1	Somatic	Unknown	broad.mit.edu	6	26184202	26184202	T	C							630
Colorectal Adenocarcinoma (DFCI, Cell Reports 2016)	coadread_dfci_2016_180077	Colorectal Adenocarcinoma	M63T	OncoKB: NA;CIViC: NA;MyCancerGenome: not present;CancerHotspot: no;3DHotspot: no	MutationAssessor: Error;SIFT: impact: undefined, score: undefined;Polyphen-2: impact: undefined, score: undefined	Missense_Mutation			NA	NA	dfci.harvard.edu	6	26184211	26184211	T	C							104
Colon Adenocarcinoma (TCGA, PanCancer Atlas)	TCGA-NH-A5IV-01	Colon Adenocarcinoma	N64S	OncoKB: NA;CIViC: NA;MyCancerGenome: not present;CancerHotspot: no;3DHotspot: no	MutationAssessor: Error;SIFT: impact: undefined, score: undefined;Polyphen-2: impact: undefined, score: undefined	Missense_Mutation			.	.	.	6	26184214	26184214	A	G			33	85		137	2379
Colorectal Adenocarcinoma (DFCI, Cell Reports 2016)	coadread_dfci_2016_2448	Colorectal Adenocarcinoma	N64Y	OncoKB: NA;CIViC: NA;MyCancerGenome: not present;CancerHotspot: no;3DHotspot: no	MutationAssessor: Error;SIFT: impact: undefined, score: undefined;Polyphen-2: impact: undefined, score: undefined	Missense_Mutation			NA	NA	dfci.harvard.edu	6	26184213	26184213	A	T							1910
Pancreatic Adenocarcinoma (TCGA, Provisional)	TCGA-2J-AABV-01	Pancreatic Adenocarcinoma	S65A	OncoKB: NA;CIViC: NA;MyCancerGenome: not present;CancerHotspot: no;3DHotspot: no	MutationAssessor: Error;SIFT: impact: undefined, score: undefined;Polyphen-2: impact: undefined, score: undefined	Missense_Mutation			Somatic	Untested	broad.mit.edu	6	26184216	26184216	T	G			10	842		275	36
Head and Neck Squamous Cell Carcinoma (TCGA, Provisional)	TCGA-QK-A6VB-01	Head and Neck Squamous Cell Carcinoma	R73H	OncoKB: NA;CIViC: NA;MyCancerGenome: not present;CancerHotspot: no;3DHotspot: yes	MutationAssessor: Error;SIFT: impact: undefined, score: undefined;Polyphen-2: impact: undefined, score: undefined	Missense_Mutation			Somatic	NA	broad.mit.edu	6	26184241	26184241	G	A			6	228			462
Colorectal Adenocarcinoma (DFCI, Cell Reports 2016)	coadread_dfci_2016_2984	Colorectal Adenocarcinoma	R73H	OncoKB: NA;CIViC: NA;MyCancerGenome: not present;CancerHotspot: no;3DHotspot: yes	MutationAssessor: Error;SIFT: impact: undefined, score: undefined;Polyphen-2: impact: undefined, score: undefined	Missense_Mutation			NA	NA	dfci.harvard.edu	6	26184241	26184241	G	A							187
Pancreatic Adenocarcinoma (TCGA, Provisional)	TCGA-3A-A9IH-01	Pancreatic Adenocarcinoma	R73H	OncoKB: NA;CIViC: NA;MyCancerGenome: not present;CancerHotspot: no;3DHotspot: yes	MutationAssessor: Error;SIFT: impact: undefined, score: undefined;Polyphen-2: impact: undefined, score: undefined	Missense_Mutation			Somatic	Untested	broad.mit.edu	6	26184241	26184241	G	A			5	547	1	175	58
Pancreatic Adenocarcinoma (TCGA, Provisional)	TCGA-2J-AAB9-01	Pancreatic Adenocarcinoma	R73H	OncoKB: NA;CIViC: NA;MyCancerGenome: not present;CancerHotspot: no;3DHotspot: yes	MutationAssessor: Error;SIFT: impact: undefined, score: undefined;Polyphen-2: impact: undefined, score: undefined	Missense_Mutation			Somatic	Untested	broad.mit.edu	6	26184241	26184241	G	A			7	758		128	30
Pan-Lung Cancer (TCGA, Nat Genet 2016)	TCGA-49-AAR9-01	Lung Adenocarcinoma	R73S	OncoKB: NA;CIViC: NA;MyCancerGenome: not present;CancerHotspot: no;3DHotspot: yes	MutationAssessor: Error;SIFT: impact: undefined, score: undefined;Polyphen-2: impact: undefined, score: undefined	Missense_Mutation			Somatic	NA	broad.mit.edu	6	26184240	26184240	C	A			101	42		187	558
Pan-Lung Cancer (TCGA, Nat Genet 2016)	TCGA-33-AASJ-01	Lung Squamous Cell Carcinoma	E77K	OncoKB: NA;CIViC: NA;MyCancerGenome: not present;CancerHotspot: no;3DHotspot: yes	MutationAssessor: Error;SIFT: impact: undefined, score: undefined;Polyphen-2: impact: undefined, score: undefined	Missense_Mutation		1	Somatic	NA	broad.mit.edu	6	26184252	26184252	G	A			26	87		104	173
TCGA data for Esophagus-Stomach Cancers (TCGA, Nature 2017)	TCGA-BR-8372-01	Stomach Adenocarcinoma	E77K	OncoKB: NA;CIViC: NA;MyCancerGenome: not present;CancerHotspot: no;3DHotspot: yes	MutationAssessor: Error;SIFT: impact: undefined, score: undefined;Polyphen-2: impact: undefined, score: undefined	Missense_Mutation		1	Somatic	Untested	genome.wustl.edu	6	26184252	26184252	G	A			59	106		295	1324
Bladder Urothelial Carcinoma (BGI, Nat Genet 2013)	B22	Bladder Urothelial Carcinoma	A78T	OncoKB: NA;CIViC: NA;MyCancerGenome: not present;CancerHotspot: no;3DHotspot: yes	MutationAssessor: Error;SIFT: impact: undefined, score: undefined;Polyphen-2: impact: undefined, score: undefined	Missense_Mutation		2	NA	NA	BGI	6	26184255	26184255	G	A							255
Colon Adenocarcinoma (TCGA, PanCancer Atlas)	TCGA-CK-4951-01	Mucinous Adenocarcinoma of the Colon and Rectum	A78V	OncoKB: NA;CIViC: NA;MyCancerGenome: not present;CancerHotspot: no;3DHotspot: yes	MutationAssessor: Error;SIFT: impact: undefined, score: undefined;Polyphen-2: impact: undefined, score: undefined	Missense_Mutation		2	.	.	.	6	26184256	26184256	C	T			23	39		133	4195
Skin Cutaneous Melanoma (TCGA, Provisional)	TCGA-EE-A29S-06	Cutaneous Melanoma	S79F	OncoKB: NA;CIViC: NA;MyCancerGenome: not present;CancerHotspot: no;3DHotspot: yes	MutationAssessor: Error;SIFT: impact: undefined, score: undefined;Polyphen-2: impact: undefined, score: undefined	Missense_Mutation		1	Somatic	NA	broad.mit.edu	6	26184259	26184259	C	T			86	84			871
Uterine Corpus Endometrial Carcinoma (TCGA, Provisional)	TCGA-AP-A0LT-01	Uterine Endometrioid Carcinoma	S88L	OncoKB: NA;CIViC: NA;MyCancerGenome: not present;CancerHotspot: no;3DHotspot: no	MutationAssessor: Error;SIFT: impact: undefined, score: undefined;Polyphen-2: impact: undefined, score: undefined	Missense_Mutation		1	Somatic	Untested	genome.wustl.edu	6	26184286	26184286	C	T			66	95		120	477
Head and Neck Squamous Cell Carcinoma (TCGA, Provisional)	TCGA-CR-7377-01	Head and Neck Squamous Cell Carcinoma	T91A	OncoKB: NA;CIViC: NA;MyCancerGenome: not present;CancerHotspot: no;3DHotspot: no	MutationAssessor: Error;SIFT: impact: undefined, score: undefined;Polyphen-2: impact: undefined, score: undefined	Missense_Mutation			Somatic	NA	broad.mit.edu	6	26184294	26184294	A	G			11	134			112
Pan-Lung Cancer (TCGA, Nat Genet 2016)	TCGA-55-7994-01	Lung Adenocarcinoma	V99L	OncoKB: NA;CIViC: NA;MyCancerGenome: not present;CancerHotspot: no;3DHotspot: no	MutationAssessor: Error;SIFT: impact: undefined, score: undefined;Polyphen-2: impact: undefined, score: undefined	Missense_Mutation			Somatic	NA	broad.mit.edu	6	26184318	26184318	G	T			25	115		137	1325
Colorectal Adenocarcinoma (DFCI, Cell Reports 2016)	coadread_dfci_2016_3152	Colorectal Adenocarcinoma	V99M	OncoKB: NA;CIViC: NA;MyCancerGenome: not present;CancerHotspot: no;3DHotspot: no	MutationAssessor: Error;SIFT: impact: undefined, score: undefined;Polyphen-2: impact: undefined, score: undefined	Missense_Mutation			NA	NA	dfci.harvard.edu	6	26184318	26184318	G	A							1089
Skin Cutaneous Melanoma (Broad, Cell 2012)	MEL-JWCI-WGS-11	Cutaneous Melanoma	R100S	OncoKB: NA;CIViC: NA;MyCancerGenome: not present;CancerHotspot: no;3DHotspot: no	MutationAssessor: Error;SIFT: impact: undefined, score: undefined;Polyphen-2: impact: undefined, score: undefined	Missense_Mutation			NA	NA	broad.mit.edu	6	26184321	26184321	C	A							539
Bladder Cancer (TCGA, Cell 2017)	TCGA-DK-A1AC-01	Bladder Urothelial Carcinoma	G105R	OncoKB: NA;CIViC: NA;MyCancerGenome: not present;CancerHotspot: no;3DHotspot: yes	MutationAssessor: Error;SIFT: impact: undefined, score: undefined;Polyphen-2: impact: undefined, score: undefined	Missense_Mutation		2	Somatic	NaN	broad.mit.edu	6	26184336	26184336	G	C				52			1259
Pancreatic Adenocarcinoma (QCMG, Nature 2016)	ICGC_0542	Pancreatic Adenocarcinoma	S113L	OncoKB: NA;CIViC: NA;MyCancerGenome: not present;CancerHotspot: no;3DHotspot: no	MutationAssessor: Error;SIFT: impact: undefined, score: undefined;Polyphen-2: impact: undefined, score: undefined	Missense_Mutation		1	Somatic	NA	qcmg.uq.edu.au	6	26184361	26184361	C	T							48
Colorectal Adenocarcinoma (DFCI, Cell Reports 2016)	coadread_dfci_2016_423	Colorectal Adenocarcinoma	V119I	OncoKB: NA;CIViC: NA;MyCancerGenome: not present;CancerHotspot: no;3DHotspot: no	MutationAssessor: Error;SIFT: impact: undefined, score: undefined;Polyphen-2: impact: undefined, score: undefined	Missense_Mutation			NA	NA	dfci.harvard.edu	6	26184378	26184378	G	A							104
Diffuse Large B-Cell Lymphoma (Broad, PNAS 2012)	DLBCL-MAYO_DLBCL_234	Diffuse Large B-Cell Lymphoma	Y122H	OncoKB: NA;CIViC: NA;MyCancerGenome: not present;CancerHotspot: no;3DHotspot: no	MutationAssessor: Error;SIFT: impact: undefined, score: undefined;Polyphen-2: impact: undefined, score: undefined	Missense_Mutation			NA	NA	broad.mit.edu	6	26184387	26184387	T	C							3894
Uterine Corpus Endometrial Carcinoma (TCGA, PanCancer Atlas)	TCGA-B5-A1N2-01	Uterine Serous Carcinoma/Uterine Papillary Serous Carcinoma	P11Q	OncoKB: NA;CIViC: NA;MyCancerGenome: not present;CancerHotspot: no;3DHotspot: no	MutationAssessor: Error;SIFT: impact: undefined, score: undefined;Polyphen-2: impact: undefined, score: undefined	Missense_Mutation	gain	1	.	.	.	6	26184055	26184055	C	A	0.4		65	97		60	141	2019-01-01	ENST00000356530.3:c.32C>A
Glioblastoma Multiforme (TCGA, PanCancer Atlas)	TCGA-19-2621-01	Glioblastoma Multiforme	S15T	OncoKB: NA;CIViC: NA;MyCancerGenome: not present;CancerHotspot: no;3DHotspot: no	MutationAssessor: Error;SIFT: impact: undefined, score: undefined;Polyphen-2: impact: undefined, score: undefined	Missense_Mutation	diploid		.	.	.	6	26184066	26184066	T	A	0.3		162	370		211	134	2019-01-01	ENST00000356530.3:c.43T>A
Uterine Corpus Endometrial Carcinoma (TCGA, PanCancer Atlas)	TCGA-EY-A548-01	Uterine Endometrioid Carcinoma	R32C	OncoKB: NA;CIViC: NA;MyCancerGenome: not present;CancerHotspot: no;3DHotspot: no	MutationAssessor: Error;SIFT: impact: undefined, score: undefined;Polyphen-2: impact: undefined, score: undefined	Missense_Mutation	diploid		.	.	.	6	26184117	26184117	C	T	0.23		26	87		110	597	2019-01-01	ENST00000356530.3:c.94C>T
Upper Tract Urothelial Carcinoma (Cornell/Baylor/MDACC, Nat Comm 2019)	WCM-UTUC-91	Upper Tract Urothelial Carcinoma	E72K	OncoKB: NA;CIViC: NA;MyCancerGenome: not present;CancerHotspot: no;3DHotspot: no	MutationAssessor: Error;SIFT: impact: undefined, score: undefined;Polyphen-2: impact: undefined, score: undefined	Missense_Mutation			Somatic	NA	WCM	6	26184237	26184237	G	A	0.3		31	72		123	349	2019-01-01	ENST00000356530.3:c.214G>A
Uterine Corpus Endometrial Carcinoma (TCGA, PanCancer Atlas)	TCGA-A5-A0G2-01	Uterine Serous Carcinoma/Uterine Papillary Serous Carcinoma	L103I	OncoKB: NA;CIViC: NA;MyCancerGenome: not present;CancerHotspot: no;3DHotspot: no	MutationAssessor: Error;SIFT: impact: undefined, score: undefined;Polyphen-2: impact: undefined, score: undefined	Missense_Mutation	diploid		.	.	.	6	26184330	26184330	C	A	0.23		26	87		126	25730	2019-01-01	ENST00000356530.3:c.307C>A
Uterine Corpus Endometrial Carcinoma (TCGA, PanCancer Atlas)	TCGA-DI-A1BU-01	Uterine Mixed Endometrial Carcinoma	A111T	OncoKB: NA;CIViC: NA;MyCancerGenome: not present;CancerHotspot: no;3DHotspot: no	MutationAssessor: Error;SIFT: impact: undefined, score: undefined;Polyphen-2: impact: undefined, score: undefined	Missense_Mutation	diploid		.	.	.	6	26184354	26184354	G	A	0.32		35	73		56	7644	2019-01-01	ENST00000356530.3:c.331G>A
Uterine Corpus Endometrial Carcinoma (TCGA, PanCancer Atlas)	TCGA-DI-A1BU-01	Uterine Mixed Endometrial Carcinoma	G115D	OncoKB: NA;CIViC: NA;MyCancerGenome: not present;CancerHotspot: no;3DHotspot: no	MutationAssessor: Error;SIFT: impact: undefined, score: undefined;Polyphen-2: impact: undefined, score: undefined	Missense_Mutation	diploid		.	.	.	6	26184367	26184367	G	A	0.34		38	75		56	7644	2019-01-01	ENST00000356530.3:c.344G>A
Ovarian Serous Cystadenocarcinoma (TCGA, PanCancer Atlas)	TCGA-23-1032-01	Serous Ovarian Cancer	T116S	OncoKB: NA;CIViC: NA;MyCancerGenome: not present;CancerHotspot: no;3DHotspot: no	MutationAssessor: Error;SIFT: impact: undefined, score: undefined;Polyphen-2: impact: undefined, score: undefined	Missense_Mutation	diploid		.	.	.	6	26184369	26184369	A	T	0.3		82	193		105	175	2019-01-01	ENST00000356530.3:c.346A>T
Urothelial Carcinoma (Cornell/Trento, Nat Gen 2016)	WCM141_1	Bladder/Urinary Tract	K117E	OncoKB: NA;CIViC: NA;MyCancerGenome: not present;CancerHotspot: no;3DHotspot: no	MutationAssessor: Error;SIFT: impact: undefined, score: undefined;Polyphen-2: impact: undefined, score: undefined	Missense_Mutation			Somatic	Untested	THE CARYL AND ISRAEL ENGLANDER INSTITUTE FOR PRECISION MEDICINE	6	26184372	26184372	A	G							127	2019-01-01	ENST00000356530.3:c.349A>G
Uterine Corpus Endometrial Carcinoma (TCGA, PanCancer Atlas)	TCGA-EO-A22R-01	Uterine Endometrioid Carcinoma	V119I	OncoKB: NA;CIViC: NA;MyCancerGenome: not present;CancerHotspot: no;3DHotspot: no	MutationAssessor: Error;SIFT: impact: undefined, score: undefined;Polyphen-2: impact: undefined, score: undefined	Missense_Mutation	diploid		.	.	.	6	26184378	26184378	G	A	0.34		31	59		83	12783	2019-01-01	ENST00000356530.3:c.355G>A

## Sheet: HIST1H2BF
Study	Sample ID	Cancer Type	Protein Change	Annotation	Functional Impact	Mutation Type	Copy #	COSMIC	MS	VS	Center	Chromosome	Start Pos	End Pos	Ref	Var	Allele Freq (T)	Allele Freq (N)	Variant Reads	Ref Reads	Variant Reads (N)	Ref Reads (N)	# Mut in Sample
Bladder Cancer (TCGA, Cell 2017)	TCGA-DK-AA6Q-01	Bladder Urothelial Carcinoma	E3K	OncoKB: NA;CIViC: NA;MyCancerGenome: not present;CancerHotspot: no;3DHotspot: no	MutationAssessor: impact: medium, score: 2.255;SIFT: impact: undefined, score: undefined;Polyphen-2: impact: undefined, score: undefined	Missense_Mutation		2	Somatic	NaN	broad.mit.edu	6	26199793	26199793	G	A				33			109
Cervical Squamous Cell Carcinoma and Endocervical Adenocarcinoma (TCGA, Provisional)	TCGA-IR-A3LL-01	Cervical Squamous Cell Carcinoma	E3K	OncoKB: NA;CIViC: NA;MyCancerGenome: not present;CancerHotspot: no;3DHotspot: no	MutationAssessor: impact: medium, score: 2.255;SIFT: impact: undefined, score: undefined;Polyphen-2: impact: undefined, score: undefined	Missense_Mutation		2	Somatic	Untested	genome.wustl.edu	6	26199793	26199793	G	A				27		80	327
Stomach Adenocarcinoma (TCGA, Provisional)	TCGA-CD-8527-01	Stomach Adenocarcinoma	E3K	OncoKB: NA;CIViC: NA;MyCancerGenome: not present;CancerHotspot: no;3DHotspot: no	MutationAssessor: impact: medium, score: 2.255;SIFT: impact: undefined, score: undefined;Polyphen-2: impact: undefined, score: undefined	Missense_Mutation		2	Somatic	Untested	genome.wustl.edu	6	26199793	26199793	G	A							224
Pan-Lung Cancer (TCGA, Nat Genet 2016)	LUAD-RT-S01477-Tumor	Lung Adenocarcinoma	E3Q	OncoKB: NA;CIViC: NA;MyCancerGenome: not present;CancerHotspot: no;3DHotspot: no	MutationAssessor: impact: medium, score: 2.255;SIFT: impact: undefined, score: undefined;Polyphen-2: impact: undefined, score: undefined	Missense_Mutation		2	Somatic	NA	broad.mit.edu	6	26199793	26199793	G	C			16	103	1	65	283
Pan-Lung Cancer (TCGA, Nat Genet 2016)	LUAD-LIP77-Tumor	Lung Adenocarcinoma	P4R	OncoKB: NA;CIViC: NA;MyCancerGenome: not present;CancerHotspot: no;3DHotspot: no	MutationAssessor: impact: medium, score: 2.175;SIFT: impact: undefined, score: undefined;Polyphen-2: impact: undefined, score: undefined	Missense_Mutation		1	Somatic	NA	broad.mit.edu	6	26199797	26199797	C	G			4	113		87	448
Pan-Lung Cancer (TCGA, Nat Genet 2016)	TCGA-78-7539-01	Lung Adenocarcinoma	P11L	OncoKB: NA;CIViC: NA;MyCancerGenome: not present;CancerHotspot: no;3DHotspot: no	MutationAssessor: impact: medium, score: 2.36;SIFT: impact: undefined, score: undefined;Polyphen-2: impact: undefined, score: undefined	Missense_Mutation		1	Somatic	NA	broad.mit.edu	6	26199818	26199818	C	T			44	85		103	410
Prostate Adenocarcinoma (TCGA, Provisional)	TCGA-KK-A6E5-01	Prostate Adenocarcinoma	P11S	OncoKB: NA;CIViC: NA;MyCancerGenome: not present;CancerHotspot: no;3DHotspot: no	MutationAssessor: impact: low, score: 1.81;SIFT: impact: undefined, score: undefined;Polyphen-2: impact: undefined, score: undefined	Missense_Mutation		1	Somatic	NA	broad.mit.edu	6	26199817	26199817	C	T			9	89			21
Pan-Lung Cancer (TCGA, Nat Genet 2016)	TCGA-05-4382-01	Lung Adenocarcinoma	G14C	OncoKB: NA;CIViC: NA;MyCancerGenome: not present;CancerHotspot: no;3DHotspot: no	MutationAssessor: impact: medium, score: 2.36;SIFT: impact: undefined, score: undefined;Polyphen-2: impact: undefined, score: undefined	Missense_Mutation			Somatic	NA	broad.mit.edu	6	26199826	26199826	G	T			29	240		89	1625
Rectum Adenocarcinoma (TCGA, PanCancer Atlas)	TCGA-AG-A00Y-01	Rectal Adenocarcinoma	S15C	OncoKB: NA;CIViC: NA;MyCancerGenome: not present;CancerHotspot: no;3DHotspot: no	MutationAssessor: impact: medium, score: 2.015;SIFT: impact: undefined, score: undefined;Polyphen-2: impact: undefined, score: undefined	Missense_Mutation			.	.	.	6	26199830	26199830	C	G			540	128		167	329
Head and Neck Squamous Cell Carcinoma (TCGA, Provisional)	TCGA-CV-7247-01	Head and Neck Squamous Cell Carcinoma	A22V	OncoKB: NA;CIViC: NA;MyCancerGenome: not present;CancerHotspot: no;3DHotspot: no	MutationAssessor: impact: low, score: 1.115;SIFT: impact: undefined, score: undefined;Polyphen-2: impact: undefined, score: undefined	Missense_Mutation			Somatic	NA	broad.mit.edu	6	26199851	26199851	C	T			23	117			74
Head and Neck Squamous Cell Carcinoma (TCGA, Provisional)	TCGA-CV-A45W-01	Head and Neck Squamous Cell Carcinoma	D26Y	OncoKB: NA;CIViC: NA;MyCancerGenome: not present;CancerHotspot: no;3DHotspot: no	MutationAssessor: impact: medium, score: 2.19;SIFT: impact: undefined, score: undefined;Polyphen-2: impact: undefined, score: undefined	Missense_Mutation			Somatic	NA	broad.mit.edu	6	26199862	26199862	G	T			14	184			565
Colorectal Adenocarcinoma (TCGA, Provisional)	TCGA-AA-3715-01	Colon Adenocarcinoma	K35R	OncoKB: NA;CIViC: NA;MyCancerGenome: not present;CancerHotspot: no;3DHotspot: no	MutationAssessor: impact: low, score: 1.595;SIFT: impact: undefined, score: undefined;Polyphen-2: impact: undefined, score: undefined	Missense_Mutation		1	Somatic	Valid	broad.mit.edu	6	26199890	26199890	A	G							1473
Colorectal Adenocarcinoma (DFCI, Cell Reports 2016)	coadread_dfci_2016_207430	Colorectal Adenocarcinoma	Y41C	OncoKB: NA;CIViC: NA;MyCancerGenome: not present;CancerHotspot: no;3DHotspot: no	MutationAssessor: impact: high, score: 4.335;SIFT: impact: undefined, score: undefined;Polyphen-2: impact: undefined, score: undefined	Missense_Mutation			NA	NA	dfci.harvard.edu	6	26199908	26199908	A	G							1440
Pediatric Ewing Sarcoma (DFCI, Cancer Discov 2014)	CHEWS025	Ewing Sarcoma	V42L	OncoKB: NA;CIViC: NA;MyCancerGenome: not present;CancerHotspot: no;3DHotspot: no	MutationAssessor: impact: neutral, score: 0.645;SIFT: impact: undefined, score: undefined;Polyphen-2: impact: undefined, score: undefined	Missense_Mutation			NA	NA	dfci.harvard.edu	6	26199910	26199910	G	C							78
Bladder Cancer (TCGA, Cell 2017)	TCGA-XF-A9ST-01	Bladder Urothelial Carcinoma	Y43C	OncoKB: NA;CIViC: NA;MyCancerGenome: not present;CancerHotspot: no;3DHotspot: no	MutationAssessor: impact: high, score: 3.58;SIFT: impact: undefined, score: undefined;Polyphen-2: impact: undefined, score: undefined	Missense_Mutation		1	Somatic	NaN	broad.mit.edu	6	26199914	26199914	A	G				122			523
Pan-Lung Cancer (TCGA, Nat Genet 2016)	TCGA-53-7624-01	Lung Adenocarcinoma	Y43F	OncoKB: NA;CIViC: NA;MyCancerGenome: not present;CancerHotspot: no;3DHotspot: no	MutationAssessor: impact: low, score: 1.075;SIFT: impact: undefined, score: undefined;Polyphen-2: impact: undefined, score: undefined	Missense_Mutation		1	Somatic	NA	broad.mit.edu	6	26199914	26199914	A	T			206	73		337	678
Pan-Lung Cancer (TCGA, Nat Genet 2016)	TCGA-33-6737-01	Lung Squamous Cell Carcinoma	Q48L	OncoKB: NA;CIViC: NA;MyCancerGenome: not present;CancerHotspot: no;3DHotspot: no	MutationAssessor: impact: high, score: 3.69;SIFT: impact: undefined, score: undefined;Polyphen-2: impact: undefined, score: undefined	Missense_Mutation		1	Somatic	NA	broad.mit.edu	6	26199929	26199929	A	T			46	257		281	380
Glioblastoma Multiforme (TCGA, Provisional)	TCGA-02-2485-01	Glioblastoma Multiforme	G54D	OncoKB: NA;CIViC: NA;MyCancerGenome: not present;CancerHotspot: no;3DHotspot: no	MutationAssessor: impact: high, score: 4.17;SIFT: impact: undefined, score: undefined;Polyphen-2: impact: undefined, score: undefined	Missense_Mutation		1	Somatic	Untested	broad.mit.edu	6	26199947	26199947	G	A							62
Pancreatic Adenocarcinoma (TCGA, Provisional)	TCGA-IB-AAUO-01	Pancreatic Adenocarcinoma	G54D	OncoKB: NA;CIViC: NA;MyCancerGenome: not present;CancerHotspot: no;3DHotspot: no	MutationAssessor: impact: high, score: 4.17;SIFT: impact: undefined, score: undefined;Polyphen-2: impact: undefined, score: undefined	Missense_Mutation		1	Somatic	Untested	broad.mit.edu	6	26199947	26199947	G	A			7	861		446	55
Esophageal Squamous Cell Carcinoma (ICGC, Nature 2014)	ESCC-002T	Esophageal Squamous Cell Carcinoma	K58Q	OncoKB: NA;CIViC: NA;MyCancerGenome: not present;CancerHotspot: no;3DHotspot: no	MutationAssessor: impact: medium, score: 3.29;SIFT: impact: undefined, score: undefined;Polyphen-2: impact: undefined, score: undefined	Missense_Mutation		1	Somatic	NA	BGI	6	26199958	26199958	A	C			8	41		56	63
Hepatocellular Carcinomas (Inserm, Nat Genet 2015)	CHC614T	Hepatocellular Carcinoma	D69G	OncoKB: NA;CIViC: NA;MyCancerGenome: not present;CancerHotspot: no;3DHotspot: no	MutationAssessor: impact: high, score: 3.975;SIFT: impact: undefined, score: undefined;Polyphen-2: impact: undefined, score: undefined	Missense_Mutation		2	NA	Valid	inserm.fr	6	26199992	26199992	A	G							62
Pancreatic Adenocarcinoma (TCGA, Provisional)	TCGA-XD-AAUL-01	Pancreatic Adenocarcinoma	R73H	OncoKB: NA;CIViC: NA;MyCancerGenome: not present;CancerHotspot: no;3DHotspot: no	MutationAssessor: impact: medium, score: 2.52;SIFT: impact: undefined, score: undefined;Polyphen-2: impact: undefined, score: undefined	Missense_Mutation			Somatic	Untested	broad.mit.edu	6	26200004	26200004	G	A			7	797		231	48
Pan-Lung Cancer (TCGA, Nat Genet 2016)	TCGA-34-2600-01	Lung Squamous Cell Carcinoma	E77K	OncoKB: NA;CIViC: NA;MyCancerGenome: not present;CancerHotspot: no;3DHotspot: no	MutationAssessor: impact: medium, score: 3.065;SIFT: impact: undefined, score: undefined;Polyphen-2: impact: undefined, score: undefined	Missense_Mutation		6	Somatic	NA	broad.mit.edu	6	26200015	26200015	G	A			31	215		261	453
Bladder Urothelial Carcinoma (BGI, Nat Genet 2013)	B74	Bladder Urothelial Carcinoma	E77K	OncoKB: NA;CIViC: NA;MyCancerGenome: not present;CancerHotspot: no;3DHotspot: no	MutationAssessor: impact: medium, score: 3.065;SIFT: impact: undefined, score: undefined;Polyphen-2: impact: undefined, score: undefined	Missense_Mutation		6	NA	NA	BGI	6	26200015	26200015	G	A							104
Bladder Cancer (TCGA, Cell 2017)	TCGA-K4-A54R-01	Bladder Urothelial Carcinoma	E77K	OncoKB: NA;CIViC: NA;MyCancerGenome: not present;CancerHotspot: no;3DHotspot: no	MutationAssessor: impact: medium, score: 3.065;SIFT: impact: undefined, score: undefined;Polyphen-2: impact: undefined, score: undefined	Missense_Mutation		6	Somatic	NaN	broad.mit.edu	6	26200015	26200015	G	A				174			811
Breast Invasive Carcinoma (TCGA, Provisional)	TCGA-A2-A0EY-01	Breast Invasive Ductal Carcinoma	E77K	OncoKB: NA;CIViC: NA;MyCancerGenome: not present;CancerHotspot: no;3DHotspot: no	MutationAssessor: impact: medium, score: 3.065;SIFT: impact: undefined, score: undefined;Polyphen-2: impact: undefined, score: undefined	Missense_Mutation		6	Somatic	Untested	genome.wustl.edu	6	26200015	26200015	G	A			20	130			140
Head and Neck Squamous Cell Carcinoma (TCGA, Provisional)	TCGA-CR-6484-01	Head and Neck Squamous Cell Carcinoma	E77K	OncoKB: NA;CIViC: NA;MyCancerGenome: not present;CancerHotspot: no;3DHotspot: no	MutationAssessor: impact: medium, score: 3.065;SIFT: impact: undefined, score: undefined;Polyphen-2: impact: undefined, score: undefined	Missense_Mutation		6	Somatic	NA	broad.mit.edu	6	26200015	26200015	G	A			11	155			245
Head and Neck Squamous Cell Carcinoma (Broad, Science 2011)	HN_62318	Head and Neck Squamous Cell Carcinoma	E77K	OncoKB: NA;CIViC: NA;MyCancerGenome: not present;CancerHotspot: no;3DHotspot: no	MutationAssessor: impact: medium, score: 3.065;SIFT: impact: undefined, score: undefined;Polyphen-2: impact: undefined, score: undefined	Missense_Mutation		6	Unknown	Unknown	broad.mit.edu	6	26200015	26200015	G	A			36	324			43
Head and Neck Squamous Cell Carcinoma (Broad, Science 2011)	HN_62755	Head and Neck Squamous Cell Carcinoma	E77K	OncoKB: NA;CIViC: NA;MyCancerGenome: not present;CancerHotspot: no;3DHotspot: no	MutationAssessor: impact: medium, score: 3.065;SIFT: impact: undefined, score: undefined;Polyphen-2: impact: undefined, score: undefined	Missense_Mutation		6	Unknown	Unknown	broad.mit.edu	6	26200015	26200015	G	A			25	165			84
Bladder Cancer (TCGA, Cell 2017)	TCGA-DK-A2I2-01	Bladder Urothelial Carcinoma	A78G	OncoKB: NA;CIViC: NA;MyCancerGenome: not present;CancerHotspot: no;3DHotspot: no	MutationAssessor: impact: high, score: 3.595;SIFT: impact: undefined, score: undefined;Polyphen-2: impact: undefined, score: undefined	Missense_Mutation		1	Somatic	NaN	broad.mit.edu	6	26200019	26200019	C	G				142			102
Primary Central Nervous System Lymphoma (Mayo Clinic, Clin Cancer Res 2015)	PCNSL_28	Primary CNS Lymphoma	A78V	OncoKB: NA;CIViC: NA;MyCancerGenome: not present;CancerHotspot: no;3DHotspot: no	MutationAssessor: impact: medium, score: 3.45;SIFT: impact: undefined, score: undefined;Polyphen-2: impact: undefined, score: undefined	Missense_Mutation		1	NA	NA	Mayo Clinic	6	26200019	26200019	C	T							245
Pan-Lung Cancer (TCGA, Nat Genet 2016)	TCGA-86-A4JF-01	Lung Adenocarcinoma	A82V	OncoKB: NA;CIViC: NA;MyCancerGenome: not present;CancerHotspot: no;3DHotspot: no	MutationAssessor: impact: medium, score: 2.355;SIFT: impact: undefined, score: undefined;Polyphen-2: impact: undefined, score: undefined	Missense_Mutation			Somatic	NA	broad.mit.edu	6	26200031	26200031	C	T			46	148		249	1203
Pan-Lung Cancer (TCGA, Nat Genet 2016)	TCGA-43-5668-01	Lung Squamous Cell Carcinoma	N85S	OncoKB: NA;CIViC: NA;MyCancerGenome: not present;CancerHotspot: no;3DHotspot: no	MutationAssessor: impact: medium, score: 2.275;SIFT: impact: undefined, score: undefined;Polyphen-2: impact: undefined, score: undefined	Missense_Mutation		1	Somatic	NA	broad.mit.edu	6	26200040	26200040	A	G			17	92		121	568
Pan-Lung Cancer (TCGA, Nat Genet 2016)	TCGA-39-5034-01	Lung Squamous Cell Carcinoma	S88A	OncoKB: NA;CIViC: NA;MyCancerGenome: not present;CancerHotspot: no;3DHotspot: no	MutationAssessor: impact: low, score: 1.845;SIFT: impact: undefined, score: undefined;Polyphen-2: impact: undefined, score: undefined	Missense_Mutation			Somatic	NA	broad.mit.edu	6	26200048	26200048	T	G			56	153		227	485
Pan-Lung Cancer (TCGA, Nat Genet 2016)	TCGA-85-8354-01	Lung Squamous Cell Carcinoma	E94D	OncoKB: NA;CIViC: NA;MyCancerGenome: not present;CancerHotspot: no;3DHotspot: no	MutationAssessor: impact: medium, score: 2.515;SIFT: impact: undefined, score: undefined;Polyphen-2: impact: undefined, score: undefined	Missense_Mutation			Somatic	NA	broad.mit.edu	6	26200068	26200068	G	C			38	62		176	178
Stomach Adenocarcinoma (TCGA, Provisional)	TCGA-HJ-7597-01	Signet Ring Cell Carcinoma of the Stomach	A98V	OncoKB: NA;CIViC: NA;MyCancerGenome: not present;CancerHotspot: no;3DHotspot: no	MutationAssessor: impact: medium, score: 3.405;SIFT: impact: undefined, score: undefined;Polyphen-2: impact: undefined, score: undefined	Missense_Mutation		1	Somatic	Untested	genome.wustl.edu	6	26200079	26200079	C	T							759
Testicular Germ Cell Cancer (TCGA, Provisional)	TCGA-2G-AAKH-01	Non-Seminomatous Germ Cell Tumor	R100C	OncoKB: NA;CIViC: NA;MyCancerGenome: not present;CancerHotspot: no;3DHotspot: no	MutationAssessor: impact: medium, score: 2.98;SIFT: impact: undefined, score: undefined;Polyphen-2: impact: undefined, score: undefined	Missense_Mutation			Somatic	Untested	hgsc.bcm.edu;broad.mit.edu;bcgsc.ca;mdanderson.org	6	26200084	26200084	C	T							98
Small Cell Lung Cancer (U Cologne, Nature 2015)	S00501	Small Cell Lung Cancer	P104L	OncoKB: NA;CIViC: NA;MyCancerGenome: not present;CancerHotspot: no;3DHotspot: no	MutationAssessor: impact: medium, score: 3.32;SIFT: impact: undefined, score: undefined;Polyphen-2: impact: undefined, score: undefined	Missense_Mutation			NA	NA	ucologne	6	26200097	26200097	C	T							704
Hepatocellular Carcinomas (Inserm, Nat Genet 2015)	CHC896T	Hepatocellular Carcinoma	G105W	OncoKB: NA;CIViC: NA;MyCancerGenome: not present;CancerHotspot: no;3DHotspot: no	MutationAssessor: impact: high, score: 4.33;SIFT: impact: undefined, score: undefined;Polyphen-2: impact: undefined, score: undefined	Missense_Mutation			NA	NA	inserm.fr	6	26200099	26200099	G	T							57
Pan-Lung Cancer (TCGA, Nat Genet 2016)	TCGA-56-6545-01	Lung Squamous Cell Carcinoma	K109N	OncoKB: NA;CIViC: NA;MyCancerGenome: not present;CancerHotspot: no;3DHotspot: no	MutationAssessor: impact: high, score: 3.625;SIFT: impact: undefined, score: undefined;Polyphen-2: impact: undefined, score: undefined	Missense_Mutation		1	Somatic	NA	broad.mit.edu	6	26200113	26200113	G	C			13	74		80	257
Hepatocellular Carcinomas (Inserm, Nat Genet 2015)	CHC892T	Hepatocellular Carcinoma	V119I	OncoKB: NA;CIViC: NA;MyCancerGenome: not present;CancerHotspot: no;3DHotspot: no	MutationAssessor: impact: medium, score: 2.595;SIFT: impact: undefined, score: undefined;Polyphen-2: impact: undefined, score: undefined	Missense_Mutation			NA	NA	inserm.fr	6	26200141	26200141	G	A							4025
Skin Cutaneous Melanoma (TCGA, Provisional)	TCGA-EE-A29E-06	Cutaneous Melanoma	T123A	OncoKB: NA;CIViC: NA;MyCancerGenome: not present;CancerHotspot: no;3DHotspot: no	MutationAssessor: impact: medium, score: 2.28;SIFT: impact: undefined, score: undefined;Polyphen-2: impact: undefined, score: undefined	Missense_Mutation		2	Somatic	NA	broad.mit.edu	6	26200153	26200153	A	G			16	18			2873
TCGA data for Esophagus-Stomach Cancers (TCGA, Nature 2017)	TCGA-BR-6452-01	Stomach Adenocarcinoma	T123S	OncoKB: NA;CIViC: NA;MyCancerGenome: not present;CancerHotspot: no;3DHotspot: no	MutationAssessor: impact: low, score: 1.415;SIFT: impact: undefined, score: undefined;Polyphen-2: impact: undefined, score: undefined	Missense_Mutation		2	Somatic	Untested	genome.wustl.edu	6	26200153	26200153	A	T			6	52		75	6541
Chronic Lymphocytic Leukemia (IUOPA, Nature 2015)	cll_iuopa_2015_509	Chronic Lymphocytic Leukemia	S124N	OncoKB: NA;CIViC: NA;MyCancerGenome: not present;CancerHotspot: no;3DHotspot: no	MutationAssessor: impact: medium, score: 2.64;SIFT: impact: undefined, score: undefined;Polyphen-2: impact: undefined, score: undefined	Missense_Mutation			NA	NA	www.unioviedo.es/IUOPA/	6	26200157	26200157	G	A							8
Pancreatic Adenocarcinoma (TCGA, Provisional)	TCGA-IB-7651-01	Pancreatic Adenocarcinoma	S124R	OncoKB: NA;CIViC: NA;MyCancerGenome: not present;CancerHotspot: no;3DHotspot: no	MutationAssessor: impact: medium, score: 2.825;SIFT: impact: undefined, score: undefined;Polyphen-2: impact: undefined, score: undefined	Missense_Mutation			Somatic	Untested	broad.mit.edu	6	26200158	26200158	C	A			53	279		80	14751
Uterine Corpus Endometrial Carcinoma (TCGA, PanCancer Atlas)	TCGA-AP-A1DK-01	Uterine Endometrioid Carcinoma	A10V	OncoKB: NA;CIViC: NA;MyCancerGenome: not present;CancerHotspot: no;3DHotspot: no	MutationAssessor: impact: medium, score: 2.075;SIFT: impact: undefined, score: undefined;Polyphen-2: impact: undefined, score: undefined	Missense_Mutation	diploid		.	.	.	6	26199815	26199815	C	T	0.26		22	64		73	10318	2019-01-01	ENST00000359985.1:c.29C>T
Diffuse Large B cell Lymphoma (DFCI, Nat Med 2018)	DLBCL-RICOVER_1081	Germinal Center B-Cell Type	V45L	OncoKB: NA;CIViC: NA;MyCancerGenome: not present;CancerHotspot: no;3DHotspot: no	MutationAssessor: impact: medium, score: 3.26;SIFT: impact: undefined, score: undefined;Polyphen-2: impact: undefined, score: undefined	Missense_Mutation			NA	NA	broad.mit.edu	6	26199919	26199919	G	C	0.4		237	354			110	2019-01-01	ENST00000359985.1:c.133G>C
Uterine Corpus Endometrial Carcinoma (TCGA, PanCancer Atlas)	TCGA-AP-A1DK-01	Uterine Endometrioid Carcinoma	Q48R	OncoKB: NA;CIViC: NA;MyCancerGenome: not present;CancerHotspot: no;3DHotspot: no	MutationAssessor: impact: medium, score: 3.34;SIFT: impact: undefined, score: undefined;Polyphen-2: impact: undefined, score: undefined	Missense_Mutation	diploid	1	.	.	.	6	26199929	26199929	A	G	0.22		27	95		113	10318	2019-01-01	ENST00000359985.1:c.143A>G
MSS Mixed Solid Tumors (Broad/Dana-Farber, Nat Genet 2018)	SD7357_T	Melanoma	M60I	OncoKB: NA;CIViC: NA;MyCancerGenome: not present;CancerHotspot: no;3DHotspot: no	MutationAssessor: impact: medium, score: 2.77;SIFT: impact: undefined, score: undefined;Polyphen-2: impact: undefined, score: undefined	Missense_Mutation			NA	NA	NA	6	26199966	26199966	G	A	0.42		42	57			1213	2019-01-01	ENST00000359985.1:c.180G>A
Cervical Squamous Cell Carcinoma (TCGA, PanCancer Atlas)	TCGA-MA-AA42-01	Cervical Squamous Cell Carcinoma	E77Q	OncoKB: NA;CIViC: NA;MyCancerGenome: not present;CancerHotspot: no;3DHotspot: no	MutationAssessor: impact: high, score: 3.615;SIFT: impact: undefined, score: undefined;Polyphen-2: impact: undefined, score: undefined	Missense_Mutation	shallowdel	6	.	.	.	6	26200015	26200015	G	C	0.36		28	50		147	453	2019-01-01	ENST00000359985.1:c.229G>C
Diffuse Large B cell Lymphoma (DFCI, Nat Med 2018)	DLBCL-RICOVER_253	Germinal Center B-Cell Type	S92P	OncoKB: NA;CIViC: NA;MyCancerGenome: not present;CancerHotspot: no;3DHotspot: no	MutationAssessor: impact: medium, score: 2.565;SIFT: impact: undefined, score: undefined;Polyphen-2: impact: undefined, score: undefined	Missense_Mutation			NA	NA	broad.mit.edu	6	26200060	26200060	T	C	0.24		104	336			79	2019-01-01	ENST00000359985.1:c.274T>C
Lung Squamous Cell Carcinoma (TCGA, PanCancer Atlas)	TCGA-85-8354-01	Lung Squamous Cell Carcinoma	E94D	OncoKB: NA;CIViC: NA;MyCancerGenome: not present;CancerHotspot: no;3DHotspot: no	MutationAssessor: impact: medium, score: 2.515;SIFT: impact: undefined, score: undefined;Polyphen-2: impact: undefined, score: undefined	Missense_Mutation	shallowdel		.	.	.	6	26200068	26200068	G	C	0.39		41	65		189	184	2019-01-01	ENST00000359985.1:c.282G>C
Bladder Urothelial Carcinoma (TCGA, PanCancer Atlas)	TCGA-DK-AA6U-01	Bladder Urothelial Carcinoma	A98T	OncoKB: NA;CIViC: NA;MyCancerGenome: not present;CancerHotspot: no;3DHotspot: no	MutationAssessor: impact: high, score: 3.52;SIFT: impact: undefined, score: undefined;Polyphen-2: impact: undefined, score: undefined	Missense_Mutation	shallowdel	1	.	.	.	6	26200078	26200078	G	A	0.19		15	65		105	414	2019-01-01	ENST00000359985.1:c.292G>A
Uterine Corpus Endometrial Carcinoma (TCGA, PanCancer Atlas)	TCGA-A5-A0G1-01	Uterine Serous Carcinoma/Uterine Papillary Serous Carcinoma	L102M	OncoKB: NA;CIViC: NA;MyCancerGenome: not present;CancerHotspot: no;3DHotspot: no	MutationAssessor: impact: low, score: 1.925;SIFT: impact: undefined, score: undefined;Polyphen-2: impact: undefined, score: undefined	Missense_Mutation	diploid		.	.	.	6	26200090	26200090	C	A	0.17		26	124		216	10823	2019-01-01	ENST00000359985.1:c.304C>A
MSS Mixed Solid Tumors (Broad/Dana-Farber, Nat Genet 2018)	PR4092_T	Melanoma	E106K	OncoKB: NA;CIViC: NA;MyCancerGenome: not present;CancerHotspot: no;3DHotspot: no	MutationAssessor: impact: medium, score: 2.915;SIFT: impact: undefined, score: undefined;Polyphen-2: impact: undefined, score: undefined	Missense_Mutation			NA	NA	NA	6	26200102	26200102	G	A	0.12		33	240			3486	2019-01-01	ENST00000359985.1:c.316G>A
Uterine Corpus Endometrial Carcinoma (TCGA, PanCancer Atlas)	TCGA-E6-A2P8-01	Uterine Mixed Endometrial Carcinoma	S113L	OncoKB: NA;CIViC: NA;MyCancerGenome: not present;CancerHotspot: no;3DHotspot: no	MutationAssessor: impact: high, score: 3.695;SIFT: impact: undefined, score: undefined;Polyphen-2: impact: undefined, score: undefined	Missense_Mutation	diploid		.	.	.	6	26200124	26200124	C	T	0.35		43	80		106	562	2019-01-01	ENST00000359985.1:c.338C>T

## Sheet: HIST1H2BG
Study	Sample ID	Cancer Type	Protein Change	Annotation	Functional Impact	Mutation Type	Copy #	COSMIC	MS	VS	Center	Chromosome	Start Pos	End Pos	Ref	Var	Allele Freq (T)	Allele Freq (N)	Variant Reads	Ref Reads	Variant Reads (N)	Ref Reads (N)	# Mut in Sample
Prostate Adenocarcinoma (TCGA, Provisional)	TCGA-KC-A4BR-01	Prostate Adenocarcinoma	E3V	OncoKB: NA;CIViC: NA;MyCancerGenome: not present;CancerHotspot: no;3DHotspot: no	MutationAssessor: Error;SIFT: impact: deleterious_low_confidence, score: 0;Polyphen-2: impact: benign, score: 0.041	Missense_Mutation		1	Somatic	NA	broad.mit.edu	6	26216864	26216864	T	A			7	75			11
Colorectal Adenocarcinoma (DFCI, Cell Reports 2016)	coadread_dfci_2016_4491	Colorectal Adenocarcinoma	P4L	OncoKB: NA;CIViC: NA;MyCancerGenome: not present;CancerHotspot: no;3DHotspot: no	MutationAssessor: Error;SIFT: impact: tolerated_low_confidence, score: 0.25;Polyphen-2: impact: unknown, score: 0	Missense_Mutation			NA	NA	dfci.harvard.edu	6	26216861	26216861	G	A							144
Pan-Lung Cancer (TCGA, Nat Genet 2016)	TCGA-98-A53B-01	Lung Squamous Cell Carcinoma	P4T	OncoKB: NA;CIViC: NA;MyCancerGenome: not present;CancerHotspot: no;3DHotspot: no	MutationAssessor: Error;SIFT: impact: tolerated_low_confidence, score: 0.19;Polyphen-2: impact: possibly_damaging, score: 0.908	Missense_Mutation			Somatic	NA	broad.mit.edu	6	26216862	26216862	G	T			14	99		99	137
Esophageal Squamous Cell Carcinoma (ICGC, Nature 2014)	ESCC-060T	Esophageal Squamous Cell Carcinoma	A8V	OncoKB: NA;CIViC: NA;MyCancerGenome: not present;CancerHotspot: no;3DHotspot: no	MutationAssessor: Error;SIFT: impact: tolerated_low_confidence, score: 0.08;Polyphen-2: impact: benign, score: 0	Missense_Mutation		1	Somatic	NA	BGI	6	26216849	26216849	G	A			122	160		194	102
Head and Neck Squamous Cell Carcinoma (TCGA, Provisional)	TCGA-CR-7371-01	Head and Neck Squamous Cell Carcinoma	P9A	OncoKB: NA;CIViC: NA;MyCancerGenome: not present;CancerHotspot: no;3DHotspot: no	MutationAssessor: Error;SIFT: impact: tolerated_low_confidence, score: 0.09;Polyphen-2: impact: unknown, score: 0	Missense_Mutation			Somatic	NA	broad.mit.edu	6	26216847	26216847	G	C			11	67			261
TCGA data for Esophagus-Stomach Cancers (TCGA, Nature 2017)	TCGA-R5-A7ZF-01	Stomach Adenocarcinoma	P9S	OncoKB: NA;CIViC: NA;MyCancerGenome: not present;CancerHotspot: no;3DHotspot: no	MutationAssessor: Error;SIFT: impact: deleterious_low_confidence, score: 0.04;Polyphen-2: impact: unknown, score: 0	Missense_Mutation			Somatic	Untested	genome.wustl.edu	6	26216847	26216847	G	A			15	101		108	53
Cervical Squamous Cell Carcinoma and Endocervical Adenocarcinoma (TCGA, Provisional)	TCGA-DG-A2KL-01	Cervical Squamous Cell Carcinoma	P9S	OncoKB: NA;CIViC: NA;MyCancerGenome: not present;CancerHotspot: no;3DHotspot: no	MutationAssessor: Error;SIFT: impact: deleterious_low_confidence, score: 0.04;Polyphen-2: impact: unknown, score: 0	Missense_Mutation			Somatic	Untested	genome.wustl.edu	6	26216847	26216847	G	A				77		84	140
Esophageal Squamous Cell Carcinoma (UCLA, Nat Genet 2014)	ESCC-F70	Esophageal Squamous Cell Carcinoma	A10S	OncoKB: NA;CIViC: NA;MyCancerGenome: not present;CancerHotspot: no;3DHotspot: no	MutationAssessor: Error;SIFT: impact: tolerated_low_confidence, score: 0.1;Polyphen-2: impact: benign, score: 0.013	Missense_Mutation			NA	NA	ucla.edu	6	26216844	26216844	C	A							9
Bladder Cancer (TCGA, Cell 2017)	TCGA-SY-A9G5-01	Bladder Urothelial Carcinoma	P11A	OncoKB: NA;CIViC: NA;MyCancerGenome: not present;CancerHotspot: no;3DHotspot: no	MutationAssessor: Error;SIFT: impact: tolerated_low_confidence, score: 0.11;Polyphen-2: impact: benign, score: 0.387	Missense_Mutation			Somatic	NaN	broad.mit.edu	6	26216841	26216841	G	C				71			905
Head and Neck Squamous Cell Carcinoma (TCGA, Provisional)	TCGA-CV-7250-01	Head and Neck Squamous Cell Carcinoma	P11R	OncoKB: NA;CIViC: NA;MyCancerGenome: not present;CancerHotspot: no;3DHotspot: no	MutationAssessor: Error;SIFT: impact: deleterious_low_confidence, score: 0;Polyphen-2: impact: unknown, score: 0	Missense_Mutation			Somatic	NA	broad.mit.edu	6	26216840	26216840	G	C			10	113			183
Ovarian Serous Cystadenocarcinoma (TCGA, Provisional)	TCGA-04-1347-01	Serous Ovarian Cancer	K17E	OncoKB: NA;CIViC: NA;MyCancerGenome: not present;CancerHotspot: no;3DHotspot: no	MutationAssessor: Error;SIFT: impact: deleterious_low_confidence, score: 0.03;Polyphen-2: impact: benign, score: 0.033	Missense_Mutation		2	Somatic	Valid	genome.wustl.edu	6	26216823	26216823	T	C							95
Head and Neck Squamous Cell Carcinoma (TCGA, Provisional)	TCGA-T2-A6X2-01	Head and Neck Squamous Cell Carcinoma	Q23H	OncoKB: NA;CIViC: NA;MyCancerGenome: not present;CancerHotspot: no;3DHotspot: no	MutationAssessor: Error;SIFT: impact: deleterious_low_confidence, score: 0.02;Polyphen-2: impact: unknown, score: 0	Missense_Mutation			Somatic	NA	broad.mit.edu	6	26216803	26216803	C	G			83	159			330
Pan-Lung Cancer (TCGA, Nat Genet 2016)	TCGA-NC-A5HG-01	Lung Squamous Cell Carcinoma	K28R	OncoKB: NA;CIViC: NA;MyCancerGenome: not present;CancerHotspot: no;3DHotspot: no	MutationAssessor: Error;SIFT: impact: tolerated_low_confidence, score: 0.07;Polyphen-2: impact: benign, score: 0.006	Missense_Mutation			Somatic	NA	broad.mit.edu	6	26216789	26216789	T	C			86	160		171	505
Uterine Corpus Endometrial Carcinoma (TCGA, Provisional)	TCGA-DI-A0WH-01	Uterine Endometrioid Carcinoma	R34C	OncoKB: NA;CIViC: NA;MyCancerGenome: not present;CancerHotspot: no;3DHotspot: no	MutationAssessor: Error;SIFT: impact: tolerated_low_confidence, score: 0.06;Polyphen-2: impact: probably_damaging, score: 0.962	Missense_Mutation		3	Somatic	Untested	genome.wustl.edu	6	26216772	26216772	G	A			147	219		424	357
Pan-Lung Cancer (TCGA, Nat Genet 2016)	LUAD-S01409-Tumor	Lung Adenocarcinoma	R34H	OncoKB: NA;CIViC: NA;MyCancerGenome: not present;CancerHotspot: no;3DHotspot: no	MutationAssessor: Error;SIFT: impact: tolerated_low_confidence, score: 0.1;Polyphen-2: impact: possibly_damaging, score: 0.894	Missense_Mutation		3	Somatic	NA	broad.mit.edu	6	26216771	26216771	C	T			57	270		346	555
TCGA data for Esophagus-Stomach Cancers (TCGA, Nature 2017)	TCGA-BR-4369-01	Stomach Adenocarcinoma	R34P	OncoKB: NA;CIViC: NA;MyCancerGenome: not present;CancerHotspot: no;3DHotspot: no	MutationAssessor: Error;SIFT: impact: deleterious_low_confidence, score: 0.01;Polyphen-2: impact: probably_damaging, score: 0.956	Missense_Mutation		3	Somatic	Untested	genome.wustl.edu	6	26216771	26216771	C	G			63	277		340	148
TCGA data for Esophagus-Stomach Cancers (TCGA, Nature 2017)	TCGA-LN-A9FQ-01	Esophageal Squamous Cell Carcinoma	E36K	OncoKB: NA;CIViC: NA;MyCancerGenome: not present;CancerHotspot: no;3DHotspot: no	MutationAssessor: Error;SIFT: impact: deleterious_low_confidence, score: 0.01;Polyphen-2: impact: benign, score: 0.145	Missense_Mutation			Somatic	Untested	genome.wustl.edu	6	26216766	26216766	C	T			16	74		100	158
Bladder Cancer (TCGA, Cell 2017)	TCGA-4Z-AA7N-01	Bladder Urothelial Carcinoma	E36K	OncoKB: NA;CIViC: NA;MyCancerGenome: not present;CancerHotspot: no;3DHotspot: no	MutationAssessor: Error;SIFT: impact: deleterious_low_confidence, score: 0.01;Polyphen-2: impact: benign, score: 0.145	Missense_Mutation			Somatic	NaN	broad.mit.edu	6	26216766	26216766	C	T				142			21
Colon Adenocarcinoma (TCGA, PanCancer Atlas)	TCGA-CM-6162-01	Mucinous Adenocarcinoma of the Colon and Rectum	Y41H	OncoKB: NA;CIViC: NA;MyCancerGenome: not present;CancerHotspot: no;3DHotspot: no	MutationAssessor: Error;SIFT: impact: deleterious_low_confidence, score: 0;Polyphen-2: impact: probably_damaging, score: 0.991	Missense_Mutation		1	.	.	.	6	26216751	26216751	A	G			61	219		252	1002
Pan-Lung Cancer (TCGA, Nat Genet 2016)	TCGA-97-7937-01	Lung Adenocarcinoma	V45L	OncoKB: NA;CIViC: NA;MyCancerGenome: not present;CancerHotspot: no;3DHotspot: no	MutationAssessor: Error;SIFT: impact: deleterious_low_confidence, score: 0.02;Polyphen-2: impact: benign, score: 0.033	Missense_Mutation		1	Somatic	NA	broad.mit.edu	6	26216739	26216739	C	A			40	155		212	424
Chronic Lymphocytic Leukemia (IUOPA, Nature 2015)	cll_iuopa_2015_596	Chronic Lymphocytic Leukemia	V49L	OncoKB: NA;CIViC: NA;MyCancerGenome: not present;CancerHotspot: no;3DHotspot: no	MutationAssessor: Error;SIFT: impact: deleterious_low_confidence, score: 0;Polyphen-2: impact: probably_damaging, score: 0.991	Missense_Mutation			NA	NA	www.unioviedo.es/IUOPA/	6	26216727	26216727	C	G							21
Hepatocellular Carcinomas (Inserm, Nat Genet 2015)	BCM375T	Hepatocellular Carcinoma	H50Y	OncoKB: NA;CIViC: NA;MyCancerGenome: not present;CancerHotspot: no;3DHotspot: no	MutationAssessor: Error;SIFT: impact: deleterious_low_confidence, score: 0.02;Polyphen-2: impact: probably_damaging, score: 1	Missense_Mutation			NA	Valid	inserm.fr	6	26216724	26216724	G	A							90
Head and Neck Squamous Cell Carcinoma (Broad, Science 2011)	HN_62825	Head and Neck Squamous Cell Carcinoma	P51A	OncoKB: NA;CIViC: NA;MyCancerGenome: not present;CancerHotspot: no;3DHotspot: no	MutationAssessor: Error;SIFT: impact: deleterious_low_confidence, score: 0.01;Polyphen-2: impact: benign, score: 0.374	Missense_Mutation		1	Unknown	Unknown	broad.mit.edu	6	26216721	26216721	G	C			93	216			59
Pan-Lung Cancer (TCGA, Nat Genet 2016)	TCGA-MN-A4N4-01	Lung Adenocarcinoma	P51R	OncoKB: NA;CIViC: NA;MyCancerGenome: not present;CancerHotspot: no;3DHotspot: no	MutationAssessor: Error;SIFT: impact: deleterious_low_confidence, score: 0;Polyphen-2: impact: probably_damaging, score: 0.965	Missense_Mutation		1	Somatic	NA	broad.mit.edu	6	26216720	26216720	G	C			40	155	1	309	1308
Breast Invasive Carcinoma (TCGA, Provisional)	TCGA-AC-A5XS-01	Breast Invasive Lobular Carcinoma	D52E	OncoKB: NA;CIViC: NA;MyCancerGenome: not present;CancerHotspot: no;3DHotspot: no	MutationAssessor: Error;SIFT: impact: deleterious_low_confidence, score: 0.03;Polyphen-2: impact: possibly_damaging, score: 0.693	Missense_Mutation		2	Somatic	Untested	genome.wustl.edu	6	26216716	26216716	A	T			35	116			357
Head and Neck Squamous Cell Carcinoma (TCGA, Provisional)	TCGA-CQ-6218-01	Head and Neck Squamous Cell Carcinoma	I55M	OncoKB: NA;CIViC: NA;MyCancerGenome: not present;CancerHotspot: no;3DHotspot: no	MutationAssessor: Error;SIFT: impact: deleterious_low_confidence, score: 0.01;Polyphen-2: impact: probably_damaging, score: 0.958	Missense_Mutation			Somatic	NA	broad.mit.edu	6	26216707	26216707	G	C			39	206			113
Head and Neck Squamous Cell Carcinoma (TCGA, Provisional)	TCGA-T3-A92M-01	Head and Neck Squamous Cell Carcinoma	S56L	OncoKB: NA;CIViC: NA;MyCancerGenome: not present;CancerHotspot: no;3DHotspot: no	MutationAssessor: Error;SIFT: impact: deleterious_low_confidence, score: 0.05;Polyphen-2: impact: benign, score: 0.195	Missense_Mutation			Somatic	NA	broad.mit.edu	6	26216705	26216705	G	A			30	194			326
Uterine Corpus Endometrial Carcinoma (TCGA, Provisional)	TCGA-AP-A051-01	Uterine Endometrioid Carcinoma	G61C	OncoKB: NA;CIViC: NA;MyCancerGenome: not present;CancerHotspot: no;3DHotspot: no	MutationAssessor: Error;SIFT: impact: deleterious_low_confidence, score: 0.01;Polyphen-2: impact: probably_damaging, score: 0.98	Missense_Mutation		1	Somatic	Untested	genome.wustl.edu	6	26216691	26216691	C	A			55	162		442	6773
Colon Adenocarcinoma (TCGA, PanCancer Atlas)	TCGA-A6-2686-01	Colon Adenocarcinoma	G61D	OncoKB: NA;CIViC: NA;MyCancerGenome: not present;CancerHotspot: no;3DHotspot: no	MutationAssessor: Error;SIFT: impact: deleterious_low_confidence, score: 0.02;Polyphen-2: impact: benign, score: 0.119	Missense_Mutation		1	.	.	.	6	26216690	26216690	C	T			17	20		103	2139
Pan-Lung Cancer (TCGA, Nat Genet 2016)	TCGA-86-8672-01	Lung Adenocarcinoma	M63I	OncoKB: NA;CIViC: NA;MyCancerGenome: not present;CancerHotspot: no;3DHotspot: no	MutationAssessor: Error;SIFT: impact: deleterious_low_confidence, score: 0.03;Polyphen-2: impact: benign, score: 0.112	Missense_Mutation			Somatic	NA	broad.mit.edu	6	26216683	26216683	C	A			118	174		369	260
Pan-Lung Cancer (TCGA, Nat Genet 2016)	TCGA-63-A5MW-01	Lung Squamous Cell Carcinoma	F66S	OncoKB: NA;CIViC: NA;MyCancerGenome: not present;CancerHotspot: no;3DHotspot: no	MutationAssessor: Error;SIFT: impact: deleterious_low_confidence, score: 0.01;Polyphen-2: impact: probably_damaging, score: 0.999	Missense_Mutation			Somatic	NA	broad.mit.edu	6	26216675	26216675	A	G			92	168		169	386
Breast Invasive Carcinoma (TCGA, Provisional)	TCGA-AN-A046-01	Breast Invasive Ductal Carcinoma	E72K	OncoKB: NA;CIViC: NA;MyCancerGenome: not present;CancerHotspot: no;3DHotspot: no	MutationAssessor: Error;SIFT: impact: deleterious_low_confidence, score: 0.03;Polyphen-2: impact: benign, score: 0.083	Missense_Mutation		2	Somatic	Untested	genome.wustl.edu	6	26216658	26216658	C	T			38	206			4274
Rectum Adenocarcinoma (TCGA, PanCancer Atlas)	TCGA-EI-6917-01	Rectal Adenocarcinoma	E72K	OncoKB: NA;CIViC: NA;MyCancerGenome: not present;CancerHotspot: no;3DHotspot: no	MutationAssessor: Error;SIFT: impact: deleterious_low_confidence, score: 0.03;Polyphen-2: impact: benign, score: 0.083	Missense_Mutation		2	.	.	.	6	26216658	26216658	C	T			21	44		71	4932
Esophageal Squamous Cell Carcinoma (UCLA, Nat Genet 2014)	ESCC-D8	Esophageal Squamous Cell Carcinoma	E72Q	OncoKB: NA;CIViC: NA;MyCancerGenome: not present;CancerHotspot: no;3DHotspot: no	MutationAssessor: Error;SIFT: impact: deleterious_low_confidence, score: 0.02;Polyphen-2: impact: benign, score: 0.172	Missense_Mutation		2	NA	NA	ucla.edu	6	26216658	26216658	C	G							75
Pan-Lung Cancer (TCGA, Nat Genet 2016)	TCGA-77-7140-01	Lung Squamous Cell Carcinoma	G76A	OncoKB: NA;CIViC: NA;MyCancerGenome: not present;CancerHotspot: no;3DHotspot: no	MutationAssessor: Error;SIFT: impact: tolerated_low_confidence, score: 0.25;Polyphen-2: impact: possibly_damaging, score: 0.884	Missense_Mutation			Somatic	NA	broad.mit.edu	6	26216645	26216645	C	G			28	81		139	170
Bladder Cancer (TCGA, Cell 2017)	TCGA-XF-A9SG-01	Bladder Urothelial Carcinoma	E77K	OncoKB: NA;CIViC: NA;MyCancerGenome: not present;CancerHotspot: no;3DHotspot: no	MutationAssessor: Error;SIFT: impact: deleterious_low_confidence, score: 0.04;Polyphen-2: impact: possibly_damaging, score: 0.812	Missense_Mutation		1	Somatic	NaN	broad.mit.edu	6	26216643	26216643	C	T				77			175
Breast Invasive Carcinoma (Broad, Nature 2012)	BR-M-037	Breast Invasive Ductal Carcinoma	E77K	OncoKB: NA;CIViC: NA;MyCancerGenome: not present;CancerHotspot: no;3DHotspot: no	MutationAssessor: Error;SIFT: impact: deleterious_low_confidence, score: 0.04;Polyphen-2: impact: possibly_damaging, score: 0.812	Missense_Mutation		1	Somatic	NA	broad.mit.edu	6	26216643	26216643	C	T							152
Pan-Lung Cancer (TCGA, Nat Genet 2016)	TCGA-60-2720-01	Lung Squamous Cell Carcinoma	E77Q	OncoKB: NA;CIViC: NA;MyCancerGenome: not present;CancerHotspot: no;3DHotspot: no	MutationAssessor: Error;SIFT: impact: deleterious_low_confidence, score: 0;Polyphen-2: impact: probably_damaging, score: 0.975	Missense_Mutation		1	Somatic	NA	broad.mit.edu	6	26216643	26216643	C	G			39	184		273	382
Colorectal Adenocarcinoma (DFCI, Cell Reports 2016)	coadread_dfci_2016_3705	Colorectal Adenocarcinoma	Y84C	OncoKB: NA;CIViC: NA;MyCancerGenome: not present;CancerHotspot: no;3DHotspot: no	MutationAssessor: Error;SIFT: impact: deleterious_low_confidence, score: 0.01;Polyphen-2: impact: probably_damaging, score: 1	Missense_Mutation			NA	NA	dfci.harvard.edu	6	26216621	26216621	T	C							116
Rectum Adenocarcinoma (TCGA, PanCancer Atlas)	TCGA-F5-6465-01	Rectal Adenocarcinoma	K86N	OncoKB: NA;CIViC: NA;MyCancerGenome: not present;CancerHotspot: no;3DHotspot: no	MutationAssessor: Error;SIFT: impact: deleterious_low_confidence, score: 0.03;Polyphen-2: impact: probably_damaging, score: 0.971	Missense_Mutation		1	.	.	.	6	26216614	26216614	C	G			25	114		139	98
Pan-Lung Cancer (TCGA, Nat Genet 2016)	TCGA-96-8169-01	Lung Squamous Cell Carcinoma	S88W	OncoKB: NA;CIViC: NA;MyCancerGenome: not present;CancerHotspot: no;3DHotspot: no	MutationAssessor: Error;SIFT: impact: deleterious_low_confidence, score: 0.01;Polyphen-2: impact: benign, score: 0.332	Missense_Mutation			Somatic	NA	broad.mit.edu	6	26216609	26216609	G	C			20	134		169	141
Adenoid Cystic Carcinoma (Sanger/MDA, JCI 2013)	ACYC-SANGER-2013_PD3190a	Adenoid Cystic Carcinoma	T89I	OncoKB: NA;CIViC: NA;MyCancerGenome: not present;CancerHotspot: no;3DHotspot: no	MutationAssessor: Error;SIFT: impact: deleterious_low_confidence, score: 0.01;Polyphen-2: impact: probably_damaging, score: 0.996	Missense_Mutation		1	NA	NA	Sanger	6	26216606	26216606	G	A							12
Adenoid Cystic Carcinoma (MDA, Clin Cancer Res 2015)	ACYC-MDA_AC19	Adenoid Cystic Carcinoma	T89I	OncoKB: NA;CIViC: NA;MyCancerGenome: not present;CancerHotspot: no;3DHotspot: no	MutationAssessor: Error;SIFT: impact: deleterious_low_confidence, score: 0.01;Polyphen-2: impact: probably_damaging, score: 0.996	Missense_Mutation		1	Somatic	NA	MDA	6	26216606	26216606	G	A							18
Metastatic Prostate Adenocarcinoma (MCTP, Nature 2012)	WA7	Prostate Adenocarcinoma	S92C	OncoKB: NA;CIViC: NA;MyCancerGenome: not present;CancerHotspot: no;3DHotspot: no	MutationAssessor: Error;SIFT: impact: deleterious_low_confidence, score: 0;Polyphen-2: impact: probably_damaging, score: 0.953	Missense_Mutation		1	NA	not tested	umich.edu	6	26216597	26216597	G	C			19	165		114	38
Bladder Cancer (TCGA, Cell 2017)	TCGA-H4-A2HO-01	Bladder Urothelial Carcinoma	R100H	OncoKB: NA;CIViC: NA;MyCancerGenome: not present;CancerHotspot: no;3DHotspot: no	MutationAssessor: Error;SIFT: impact: deleterious_low_confidence, score: 0.05;Polyphen-2: impact: benign, score: 0.011	Missense_Mutation		1	Somatic	NaN	broad.mit.edu	6	26216573	26216573	C	T				148			82
Skin Cutaneous Melanoma(Broad, Cancer Discov 2014)	Pat_59_Post	Melanoma	P104L	OncoKB: NA;CIViC: NA;MyCancerGenome: not present;CancerHotspot: no;3DHotspot: no	MutationAssessor: Error;SIFT: impact: deleterious_low_confidence, score: 0.03;Polyphen-2: impact: possibly_damaging, score: 0.459	Missense_Mutation		1	NA	NA	broad.mit.edu	6	26216561	26216561	G	A			57	284			886
Neuroblastoma (Broad Institute 2013)	TARGET-30-PASCJJ	Neuroblastoma	P104S	OncoKB: NA;CIViC: NA;MyCancerGenome: not present;CancerHotspot: no;3DHotspot: no	MutationAssessor: Error;SIFT: impact: deleterious_low_confidence, score: 0;Polyphen-2: impact: probably_damaging, score: 0.953	Missense_Mutation		1	NA	NA	broadinstitute.org	6	26216562	26216562	G	A			23	77			18
Cervical Squamous Cell Carcinoma and Endocervical Adenocarcinoma (TCGA, Provisional)	TCGA-EA-A3Y4-01	Cervical Squamous Cell Carcinoma	G105R	OncoKB: NA;CIViC: NA;MyCancerGenome: not present;CancerHotspot: no;3DHotspot: no	MutationAssessor: Error;SIFT: impact: deleterious_low_confidence, score: 0.01;Polyphen-2: impact: probably_damaging, score: 1	Missense_Mutation			Somatic	Untested	genome.wustl.edu	6	26216559	26216559	C	T				69		110	114
Colorectal Adenocarcinoma (DFCI, Cell Reports 2016)	coadread_dfci_2016_3637	Colorectal Adenocarcinoma	A108T	OncoKB: NA;CIViC: NA;MyCancerGenome: not present;CancerHotspot: no;3DHotspot: no	MutationAssessor: Error;SIFT: impact: deleterious_low_confidence, score: 0.01;Polyphen-2: impact: benign, score: 0.245	Missense_Mutation			NA	NA	dfci.harvard.edu	6	26216550	26216550	C	T							112
Lymphoid Neoplasm Diffuse Large B-cell Lymphoma (TCGA, Provisional)	TCGA-FA-A6HN-01	Diffuse Large B-Cell Lymphoma	H110Y	OncoKB: NA;CIViC: NA;MyCancerGenome: not present;CancerHotspot: no;3DHotspot: no	MutationAssessor: Error;SIFT: impact: deleterious_low_confidence, score: 0;Polyphen-2: impact: possibly_damaging, score: 0.745	Missense_Mutation			Somatic	Untested	hgsc.bcm.edu	6	26216544	26216544	G	A			7	69		69	149
Breast Invasive Carcinoma (TCGA, Provisional)	TCGA-OL-A5RW-01	Breast Invasive Ductal Carcinoma	E114K	OncoKB: NA;CIViC: NA;MyCancerGenome: not present;CancerHotspot: no;3DHotspot: no	MutationAssessor: Error;SIFT: impact: tolerated_low_confidence, score: 0.07;Polyphen-2: impact: benign, score: 0.041	Missense_Mutation		1	Somatic	Untested	genome.wustl.edu	6	26216532	26216532	C	T			32	72			120
Bladder Cancer (TCGA, Cell 2017)	TCGA-DK-AA75-01	Bladder Urothelial Carcinoma	E114Q	OncoKB: NA;CIViC: NA;MyCancerGenome: not present;CancerHotspot: no;3DHotspot: no	MutationAssessor: Error;SIFT: impact: deleterious_low_confidence, score: 0.02;Polyphen-2: impact: benign, score: 0.113	Missense_Mutation		1	Somatic	NaN	broad.mit.edu	6	26216532	26216532	C	G				35			408
Cervical Squamous Cell Carcinoma and Endocervical Adenocarcinoma (TCGA, Provisional)	TCGA-EK-A2PM-01	Cervical Squamous Cell Carcinoma	E114Q	OncoKB: NA;CIViC: NA;MyCancerGenome: not present;CancerHotspot: no;3DHotspot: no	MutationAssessor: Error;SIFT: impact: deleterious_low_confidence, score: 0.02;Polyphen-2: impact: benign, score: 0.113	Missense_Mutation		1	Somatic	Untested	genome.wustl.edu	6	26216532	26216532	C	G				51		86	253
Kidney Renal Papillary Cell Carcinoma (TCGA, Provisional)	TCGA-5P-A9K8-01	Papillary Renal Cell Carcinoma	E114Q	OncoKB: NA;CIViC: NA;MyCancerGenome: not present;CancerHotspot: no;3DHotspot: no	MutationAssessor: Error;SIFT: impact: deleterious_low_confidence, score: 0.02;Polyphen-2: impact: benign, score: 0.113	Missense_Mutation		1	Somatic	Untested	hgsc.bcm.edu	6	26216532	26216532	C	G			21	64		58	16
Pancreatic Adenocarcinoma (TCGA, Provisional)	TCGA-IB-7651-01	Pancreatic Adenocarcinoma	K117E	OncoKB: NA;CIViC: NA;MyCancerGenome: not present;CancerHotspot: no;3DHotspot: no	MutationAssessor: Error;SIFT: impact: deleterious_low_confidence, score: 0.01;Polyphen-2: impact: benign, score: 0.034	Missense_Mutation			Somatic	Untested	broad.mit.edu	6	26216523	26216523	T	C			127	559		164	14751
MSS Mixed Solid Tumors (Broad/Dana-Farber, Nat Genet 2018)	LSD0167_T	Cutaneous Melanoma	P9S	OncoKB: Unknown, level NA;CIViC: NA;MyCancerGenome: not present;CancerHotspot: no;3DHotspot: no	MutationAssessor: Error;SIFT: impact: deleterious_low_confidence, score: 0.04;Polyphen-2: impact: unknown, score: 0	Missense_Mutation			NA	NA	NA	6	26216847	26216847	G	A	0.15		43	243			421	2019-01-01	ENST00000244601.3:c.25C>T
Uterine Corpus Endometrial Carcinoma (TCGA, PanCancer Atlas)	TCGA-AJ-A2QM-01	Uterine Serous Carcinoma/Uterine Papillary Serous Carcinoma	T20A	OncoKB: Unknown, level NA;CIViC: NA;MyCancerGenome: not present;CancerHotspot: no;3DHotspot: no	MutationAssessor: Error;SIFT: impact: tolerated_low_confidence, score: 0.11;Polyphen-2: impact: benign, score: 0	Missense_Mutation	diploid		.	.	.	6	26216814	26216814	T	C	0.22		25	87		91	180	2019-01-01	ENST00000244601.3:c.58A>G
Glioblastoma Multiforme (TCGA, PanCancer Atlas)	TCGA-28-2506-01	Glioblastoma Multiforme	K24Q	OncoKB: Unknown, level NA;CIViC: NA;MyCancerGenome: not present;CancerHotspot: no;3DHotspot: no	MutationAssessor: Error;SIFT: impact: deleterious_low_confidence, score: 0;Polyphen-2: impact: benign, score: 0	Missense_Mutation	shallowdel		.	.	.	6	26216802	26216802	T	G	0.45		107	129		624	284	2019-01-01	ENST00000244601.3:c.70A>C
Cervical Squamous Cell Carcinoma (TCGA, PanCancer Atlas)	TCGA-VS-A9V2-01	Cervical Squamous Cell Carcinoma	K31E	OncoKB: Unknown, level NA;CIViC: NA;MyCancerGenome: not present;CancerHotspot: no;3DHotspot: no	MutationAssessor: Error;SIFT: impact: deleterious_low_confidence, score: 0;Polyphen-2: impact: benign, score: 0	Missense_Mutation	gain		.	.	.	6	26216781	26216781	T	C	0.24		27	84		58	38	2019-01-01	ENST00000244601.3:c.91A>G
Upper Tract Urothelial Carcinoma (Cornell/Baylor/MDACC, Nat Comm 2019)	WCM-UTUC-89	Upper Tract Urothelial Carcinoma	K44R	OncoKB: Unknown, level NA;CIViC: NA;MyCancerGenome: not present;CancerHotspot: no;3DHotspot: no	MutationAssessor: Error;SIFT: impact: tolerated_low_confidence, score: 0.06;Polyphen-2: impact: benign, score: 0.109	Missense_Mutation			Somatic	NA	WCM	6	26216741	26216741	T	C	0.06		9	150		106	26	2019-01-01	ENST00000244601.3:c.131A>G
Uterine Corpus Endometrial Carcinoma (TCGA, PanCancer Atlas)	TCGA-4E-A92E-01	Uterine Endometrioid Carcinoma	D52N	OncoKB: Unknown, level NA;CIViC: NA;MyCancerGenome: not present;CancerHotspot: no;3DHotspot: no	MutationAssessor: Error;SIFT: impact: deleterious_low_confidence, score: 0.02;Polyphen-2: impact: possibly_damaging, score: 0.902	Missense_Mutation	diploid	2	.	.	.	6	26216718	26216718	C	T	0.37		29	49		86	146	2019-01-01	ENST00000244601.3:c.154G>A
Uterine Corpus Endometrial Carcinoma (TCGA, PanCancer Atlas)	TCGA-E6-A1LX-01	Uterine Endometrioid Carcinoma	M63I	OncoKB: Unknown, level NA;CIViC: NA;MyCancerGenome: not present;CancerHotspot: no;3DHotspot: no	MutationAssessor: Error;SIFT: impact: deleterious_low_confidence, score: 0.03;Polyphen-2: impact: benign, score: 0.112	Missense_Mutation	diploid		.	.	.	6	26216683	26216683	C	A	0.34		43	82		102	12696	2019-01-01	ENST00000244601.3:c.189G>T
Uterine Corpus Endometrial Carcinoma (TCGA, PanCancer Atlas)	TCGA-AJ-A3BH-01	Uterine Endometrioid Carcinoma	F66L	OncoKB: Unknown, level NA;CIViC: NA;MyCancerGenome: not present;CancerHotspot: no;3DHotspot: no	MutationAssessor: Error;SIFT: impact: deleterious_low_confidence, score: 0.01;Polyphen-2: impact: probably_damaging, score: 0.911	Missense_Mutation	diploid		.	.	.	6	26216676	26216676	A	G	0.06		7	113		138	2681	2019-01-01	ENST00000244601.3:c.196T>C
Cervical Squamous Cell Carcinoma (TCGA, PanCancer Atlas)	TCGA-EK-A2RJ-01	Cervical Squamous Cell Carcinoma	I70M	OncoKB: Unknown, level NA;CIViC: NA;MyCancerGenome: not present;CancerHotspot: no;3DHotspot: no	MutationAssessor: Error;SIFT: impact: deleterious_low_confidence, score: 0.01;Polyphen-2: impact: probably_damaging, score: 0.914	Missense_Mutation	gain	2	.	.	.	6	26216662	26216662	G	C	0.05		7	131		121	336	2019-01-01	ENST00000244601.3:c.210C>G
Uterine Corpus Endometrial Carcinoma (TCGA, PanCancer Atlas)	TCGA-A5-A0G1-01	Uterine Serous Carcinoma/Uterine Papillary Serous Carcinoma	E72K	OncoKB: Unknown, level NA;CIViC: NA;MyCancerGenome: not present;CancerHotspot: no;3DHotspot: no	MutationAssessor: Error;SIFT: impact: deleterious_low_confidence, score: 0.03;Polyphen-2: impact: benign, score: 0.083	Missense_Mutation	diploid	2	.	.	.	6	26216658	26216658	C	T	0.16		35	181		277	10823	2019-01-01	ENST00000244601.3:c.214G>A
Stomach Adenocarcinoma (TCGA, PanCancer Atlas)	TCGA-VQ-A8PB-01	Papillary Stomach Adenocarcinoma	A75T	OncoKB: Unknown, level NA;CIViC: NA;MyCancerGenome: not present;CancerHotspot: no;3DHotspot: no	MutationAssessor: Error;SIFT: impact: deleterious_low_confidence, score: 0.05;Polyphen-2: impact: benign, score: 0.132	Missense_Mutation	diploid		.	.	.	6	26216649	26216649	C	T	0.23		39	127		137	740	2019-01-01	ENST00000244601.3:c.223G>A
Breast Invasive Carcinoma (TCGA, PanCancer Atlas)	TCGA-A2-A04X-01	Breast Invasive Ductal Carcinoma	A75V	OncoKB: Unknown, level NA;CIViC: NA;MyCancerGenome: not present;CancerHotspot: no;3DHotspot: no	MutationAssessor: Error;SIFT: impact: deleterious_low_confidence, score: 0.01;Polyphen-2: impact: benign, score: 0.156	Missense_Mutation	gain		.	.	.	6	26216648	26216648	G	A	0.2	0	54	221	1	205	28	2019-01-01	ENST00000244601.3:c.224C>T
MSS Mixed Solid Tumors (Broad/Dana-Farber, Nat Genet 2018)	PR4092_T	Melanoma	S79F	OncoKB: Unknown, level NA;CIViC: NA;MyCancerGenome: not present;CancerHotspot: no;3DHotspot: no	MutationAssessor: Error;SIFT: impact: deleterious_low_confidence, score: 0;Polyphen-2: impact: probably_damaging, score: 0.982	Missense_Mutation			NA	NA	NA	6	26216636	26216636	G	A	0.13		56	379			3486	2019-01-01	ENST00000244601.3:c.236C>T
Uterine Corpus Endometrial Carcinoma (TCGA, PanCancer Atlas)	TCGA-A5-A0G1-01	Uterine Serous Carcinoma/Uterine Papillary Serous Carcinoma	K86M	OncoKB: Unknown, level NA;CIViC: NA;MyCancerGenome: not present;CancerHotspot: no;3DHotspot: no	MutationAssessor: Error;SIFT: impact: deleterious_low_confidence, score: 0;Polyphen-2: impact: probably_damaging, score: 0.988	Missense_Mutation	diploid	1	.	.	.	6	26216615	26216615	T	A	0.2		30	122		189	10823	2019-01-01	ENST00000244601.3:c.257A>T
Breast Invasive Carcinoma (TCGA, PanCancer Atlas)	TCGA-AO-A03M-01	Breast Invasive Ductal Carcinoma	E114K	OncoKB: Unknown, level NA;CIViC: NA;MyCancerGenome: not present;CancerHotspot: no;3DHotspot: no	MutationAssessor: Error;SIFT: impact: tolerated_low_confidence, score: 0.07;Polyphen-2: impact: benign, score: 0.041	Missense_Mutation	gain	1	.	.	.	6	26216532	26216532	C	T	0.1		9	84		95	753	2019-01-01	ENST00000244601.3:c.340G>A

## Sheet: HIST1H2BH
Study	Sample ID	Cancer Type	Protein Change	Annotation	Functional Impact	Mutation Type	Copy #	COSMIC	MS	VS	Center	Chromosome	Start Pos	End Pos	Ref	Var	Allele Freq (T)	Allele Freq (N)	Variant Reads	Ref Reads	Variant Reads (N)	Ref Reads (N)	# Mut in Sample
Ovarian Serous Cystadenocarcinoma (TCGA, Provisional)	TCGA-24-2261-01	Serous Ovarian Cancer	P2L	OncoKB: NA;CIViC: NA;MyCancerGenome: not present;CancerHotspot: no;3DHotspot: no	MutationAssessor: impact: medium, score: 2.225;SIFT: impact: undefined, score: undefined;Polyphen-2: impact: undefined, score: undefined	Missense_Mutation		1	Unknown	Unknown	broad.mit.edu	6	26251883	26251883	C	T							31
Head and Neck Squamous Cell Carcinoma (Broad, Science 2011)	HN_62646	Head and Neck Squamous Cell Carcinoma	D3E	OncoKB: NA;CIViC: NA;MyCancerGenome: not present;CancerHotspot: no;3DHotspot: no	MutationAssessor: impact: neutral, score: -2.045;SIFT: impact: undefined, score: undefined;Polyphen-2: impact: undefined, score: undefined	Missense_Mutation		2	Somatic	Valid	broad.mit.edu	6	26251887	26251887	T	G			8	33			127
Esophageal Squamous Cell Carcinoma (ICGC, Nature 2014)	ESCC-250T	Esophageal Squamous Cell Carcinoma	D3N	OncoKB: NA;CIViC: NA;MyCancerGenome: not present;CancerHotspot: no;3DHotspot: no	MutationAssessor: impact: neutral, score: 0.55;SIFT: impact: undefined, score: undefined;Polyphen-2: impact: undefined, score: undefined	Missense_Mutation		2	Somatic	NA	BGI	6	26251885	26251885	G	A			21	175		296	121
Pan-Lung Cancer (TCGA, Nat Genet 2016)	TCGA-68-7755-01	Lung Squamous Cell Carcinoma	A10T	OncoKB: NA;CIViC: NA;MyCancerGenome: not present;CancerHotspot: no;3DHotspot: no	MutationAssessor: impact: low, score: 1.675;SIFT: impact: undefined, score: undefined;Polyphen-2: impact: undefined, score: undefined	Missense_Mutation			Somatic	NA	broad.mit.edu	6	26251906	26251906	G	A			6	83	1	94	244
Ampullary Carcinoma (Baylor College of Medicine, Cell Reports 2016)	CAC_8412	Ampulla of Vater	P11L	OncoKB: NA;CIViC: NA;MyCancerGenome: not present;CancerHotspot: no;3DHotspot: no	MutationAssessor: impact: medium, score: 2.62;SIFT: impact: undefined, score: undefined;Polyphen-2: impact: undefined, score: undefined	Missense_Mutation		1	Somatic	Untested	Baylor College of Medicine	6	26251910	26251910	C	T			17	219	1	97	22
Ovarian Serous Cystadenocarcinoma (TCGA, Provisional)	TCGA-13-1488-01	Serous Ovarian Cancer	P11L	OncoKB: NA;CIViC: NA;MyCancerGenome: not present;CancerHotspot: no;3DHotspot: no	MutationAssessor: impact: medium, score: 2.62;SIFT: impact: undefined, score: undefined;Polyphen-2: impact: undefined, score: undefined	Missense_Mutation		1	Somatic	Valid	genome.wustl.edu	6	26251910	26251910	C	T							91
TCGA data for Esophagus-Stomach Cancers (TCGA, Nature 2017)	TCGA-LN-A49X-01	Esophageal Squamous Cell Carcinoma	S15C	OncoKB: NA;CIViC: NA;MyCancerGenome: not present;CancerHotspot: no;3DHotspot: no	MutationAssessor: impact: medium, score: 2.3;SIFT: impact: undefined, score: undefined;Polyphen-2: impact: undefined, score: undefined	Missense_Mutation			Somatic	Untested	genome.wustl.edu	6	26251922	26251922	C	G			13	109		148	106
Esophageal Adenocarcinoma (Broad, Nat Genet 2013)	ESO-130	Esophageal Adenocarcinoma	K17T	OncoKB: NA;CIViC: NA;MyCancerGenome: not present;CancerHotspot: no;3DHotspot: no	MutationAssessor: impact: medium, score: 2.695;SIFT: impact: undefined, score: undefined;Polyphen-2: impact: undefined, score: undefined	Missense_Mutation		1	Somatic	NA	broad.mit.edu	6	26251928	26251928	A	C				138			92
Breast Invasive Carcinoma (Sanger, Nature 2012)	PD4596a	Invasive Breast Carcinoma	Q23H	OncoKB: NA;CIViC: NA;MyCancerGenome: not present;CancerHotspot: no;3DHotspot: no	MutationAssessor: impact: medium, score: 2.6;SIFT: impact: undefined, score: undefined;Polyphen-2: impact: undefined, score: undefined	Missense_Mutation		2	Unknown	Unknown	Sanger	6	26251947	26251947	G	C							132
Cervical Squamous Cell Carcinoma and Endocervical Adenocarcinoma (TCGA, Provisional)	TCGA-EK-A2RJ-01	Cervical Squamous Cell Carcinoma	Q23H	OncoKB: NA;CIViC: NA;MyCancerGenome: not present;CancerHotspot: no;3DHotspot: no	MutationAssessor: impact: medium, score: 2.6;SIFT: impact: undefined, score: undefined;Polyphen-2: impact: undefined, score: undefined	Missense_Mutation		2	Somatic	Untested	genome.wustl.edu	6	26251947	26251947	G	C				96		76	308
Head and Neck Squamous Cell Carcinoma (TCGA, Provisional)	TCGA-BB-4223-01	Head and Neck Squamous Cell Carcinoma	Q23H	OncoKB: NA;CIViC: NA;MyCancerGenome: not present;CancerHotspot: no;3DHotspot: no	MutationAssessor: impact: medium, score: 2.6;SIFT: impact: undefined, score: undefined;Polyphen-2: impact: undefined, score: undefined	Missense_Mutation		2	Somatic	NA	broad.mit.edu	6	26251947	26251947	G	C			13	233			296
Head and Neck Squamous Cell Carcinoma (Broad, Science 2011)	HN_63021	Head and Neck Squamous Cell Carcinoma	Q23K	OncoKB: NA;CIViC: NA;MyCancerGenome: not present;CancerHotspot: no;3DHotspot: no	MutationAssessor: impact: medium, score: 2.6;SIFT: impact: undefined, score: undefined;Polyphen-2: impact: undefined, score: undefined	Missense_Mutation		2	Somatic	Valid	broad.mit.edu	6	26251945	26251945	C	A			32	57			201
Uterine Corpus Endometrial Carcinoma (TCGA, Provisional)	TCGA-EY-A1GS-01	Uterine Serous Carcinoma/Uterine Papillary Serous Carcinoma	D26N	OncoKB: NA;CIViC: NA;MyCancerGenome: not present;CancerHotspot: no;3DHotspot: no	MutationAssessor: impact: medium, score: 2.565;SIFT: impact: undefined, score: undefined;Polyphen-2: impact: undefined, score: undefined	Missense_Mutation		1	Somatic	Untested	genome.wustl.edu	6	26251954	26251954	G	A			29	44		100	212
Pan-Lung Cancer (TCGA, Nat Genet 2016)	TCGA-21-1079-01	Lung Squamous Cell Carcinoma	G27N	OncoKB: NA;CIViC: NA;MyCancerGenome: not present;CancerHotspot: no;3DHotspot: no		Missense_Mutation			Somatic	NA	broad.mit.edu	6	26251957	26251958	GG	AA			47	108		323	1303
Bladder Urothelial Carcinoma (Dana Farber & MSKCC, Cancer Discov 2014)	MSKCC-0620_R	Bladder Urothelial Carcinoma	K28N	OncoKB: NA;CIViC: NA;MyCancerGenome: not present;CancerHotspot: no;3DHotspot: no	MutationAssessor: impact: medium, score: 2.62;SIFT: impact: undefined, score: undefined;Polyphen-2: impact: undefined, score: undefined	Missense_Mutation			NA	NA	NA	6	26251962	26251962	G	C							258
Colorectal Adenocarcinoma (DFCI, Cell Reports 2016)	coadread_dfci_2016_68	Colorectal Adenocarcinoma	R30C	OncoKB: NA;CIViC: NA;MyCancerGenome: not present;CancerHotspot: no;3DHotspot: no	MutationAssessor: impact: low, score: 1.06;SIFT: impact: undefined, score: undefined;Polyphen-2: impact: undefined, score: undefined	Missense_Mutation			NA	NA	dfci.harvard.edu	6	26251966	26251966	C	T							1422
TCGA data for Esophagus-Stomach Cancers (TCGA, Nature 2017)	TCGA-CG-5721-01	Stomach Adenocarcinoma	R34C	OncoKB: NA;CIViC: NA;MyCancerGenome: not present;CancerHotspot: no;3DHotspot: no	MutationAssessor: impact: medium, score: 2.445;SIFT: impact: undefined, score: undefined;Polyphen-2: impact: undefined, score: undefined	Missense_Mutation		1	Somatic	Untested	genome.wustl.edu	6	26251978	26251978	C	T			52	140		210	3803
Pan-Lung Cancer (TCGA, Nat Genet 2016)	TCGA-43-5670-01	Lung Squamous Cell Carcinoma	E36D	OncoKB: NA;CIViC: NA;MyCancerGenome: not present;CancerHotspot: no;3DHotspot: no	MutationAssessor: impact: medium, score: 2.245;SIFT: impact: undefined, score: undefined;Polyphen-2: impact: undefined, score: undefined	Missense_Mutation			Somatic	NA	broad.mit.edu	6	26251986	26251986	G	C			32	129		196	117
Pan-Lung Cancer (TCGA, Nat Genet 2016)	TCGA-55-8616-01	Lung Adenocarcinoma	S39C	OncoKB: NA;CIViC: NA;MyCancerGenome: not present;CancerHotspot: no;3DHotspot: no	MutationAssessor: impact: medium, score: 3.19;SIFT: impact: undefined, score: undefined;Polyphen-2: impact: undefined, score: undefined	Missense_Mutation			Somatic	NA	broad.mit.edu	6	26251994	26251994	C	G			52	161		196	418
Pancreatic Adenocarcinoma (QCMG, Nature 2016)	ICGC_0203	Pancreatic Adenocarcinoma	Y41C	OncoKB: NA;CIViC: NA;MyCancerGenome: not present;CancerHotspot: no;3DHotspot: no	MutationAssessor: impact: high, score: 4.335;SIFT: impact: undefined, score: undefined;Polyphen-2: impact: undefined, score: undefined	Missense_Mutation		1	Somatic	NA	qcmg.uq.edu.au	6	26252000	26252000	A	G							27
Chronic Lymphocytic Leukemia (IUOPA, Nature 2015)	cll_iuopa_2015_852	Chronic Lymphocytic Leukemia	V42L	OncoKB: NA;CIViC: NA;MyCancerGenome: not present;CancerHotspot: no;3DHotspot: no	MutationAssessor: impact: neutral, score: 0.645;SIFT: impact: undefined, score: undefined;Polyphen-2: impact: undefined, score: undefined	Missense_Mutation			NA	NA	www.unioviedo.es/IUOPA/	6	26252002	26252002	G	C							14
Pancreatic Adenocarcinoma (TCGA, Provisional)	TCGA-IB-7651-01	Pancreatic Adenocarcinoma	Y43C	OncoKB: NA;CIViC: NA;MyCancerGenome: not present;CancerHotspot: no;3DHotspot: no	MutationAssessor: impact: high, score: 3.58;SIFT: impact: undefined, score: undefined;Polyphen-2: impact: undefined, score: undefined	Missense_Mutation			Somatic	Untested	broad.mit.edu	6	26252006	26252006	A	G			153	706		177	14751
Lung Adenocarcinoma (Broad, Cell 2012)	LUAD-NYU669	Lung Adenocarcinoma	K44M	OncoKB: NA;CIViC: NA;MyCancerGenome: not present;CancerHotspot: no;3DHotspot: no	MutationAssessor: impact: high, score: 4.175;SIFT: impact: undefined, score: undefined;Polyphen-2: impact: undefined, score: undefined	Missense_Mutation			Unknown	NA	broad.mit.edu	6	26252009	26252009	A	T							319
Bladder Cancer (TCGA, Cell 2017)	TCGA-FD-A43P-01	Bladder Urothelial Carcinoma	K47R	OncoKB: NA;CIViC: NA;MyCancerGenome: not present;CancerHotspot: no;3DHotspot: no	MutationAssessor: impact: medium, score: 2.015;SIFT: impact: undefined, score: undefined;Polyphen-2: impact: undefined, score: undefined	Missense_Mutation			Somatic	NaN	broad.mit.edu	6	26252018	26252018	A	G				56			368
Colorectal Adenocarcinoma (DFCI, Cell Reports 2016)	coadread_dfci_2016_3724	Colorectal Adenocarcinoma	G54D	OncoKB: NA;CIViC: NA;MyCancerGenome: not present;CancerHotspot: no;3DHotspot: no	MutationAssessor: impact: high, score: 4.17;SIFT: impact: undefined, score: undefined;Polyphen-2: impact: undefined, score: undefined	Missense_Mutation			NA	NA	dfci.harvard.edu	6	26252039	26252039	G	A							1887
Skin Cutaneous Melanoma (Broad, Cell 2012)	MEL-JWCI-27	Cutaneous Melanoma	S65F	OncoKB: NA;CIViC: NA;MyCancerGenome: not present;CancerHotspot: no;3DHotspot: no	MutationAssessor: impact: high, score: 3.925;SIFT: impact: undefined, score: undefined;Polyphen-2: impact: undefined, score: undefined	Missense_Mutation			NA	NA	broad.mit.edu	6	26252072	26252072	C	T							1798
Adrenocortical Carcinoma (TCGA, Provisional)	TCGA-OR-A5KB-01	Adrenocortical Carcinoma	V67D	OncoKB: NA;CIViC: NA;MyCancerGenome: not present;CancerHotspot: no;3DHotspot: yes	MutationAssessor: impact: high, score: 3.66;SIFT: impact: undefined, score: undefined;Polyphen-2: impact: undefined, score: undefined	Missense_Mutation			Somatic	Untested	hgsc.bcm.edu;broad.mit.edu;ucsc.edu;bcgsc.ca;mdanderson.org	6	26252078	26252078	T	A			116	167	1	248	1977
Pan-Lung Cancer (TCGA, Nat Genet 2016)	TCGA-05-4410-01	Lung Adenocarcinoma	D69H	OncoKB: NA;CIViC: NA;MyCancerGenome: not present;CancerHotspot: no;3DHotspot: yes	MutationAssessor: impact: high, score: 3.515;SIFT: impact: undefined, score: undefined;Polyphen-2: impact: undefined, score: undefined	Missense_Mutation		2	Somatic	NA	broad.mit.edu	6	26252083	26252083	G	C			64	121		179	984
Bladder Cancer (TCGA, Cell 2017)	TCGA-BT-A42F-01	Bladder Urothelial Carcinoma	D69H	OncoKB: NA;CIViC: NA;MyCancerGenome: not present;CancerHotspot: no;3DHotspot: yes	MutationAssessor: impact: high, score: 3.515;SIFT: impact: undefined, score: undefined;Polyphen-2: impact: undefined, score: undefined	Missense_Mutation		2	Somatic	NaN	broad.mit.edu	6	26252083	26252083	G	C				80			167
Bladder Cancer (TCGA, Cell 2017)	TCGA-ZF-AA4X-01	Bladder Urothelial Carcinoma	D69N	OncoKB: NA;CIViC: NA;MyCancerGenome: not present;CancerHotspot: no;3DHotspot: yes	MutationAssessor: impact: medium, score: 3.35;SIFT: impact: undefined, score: undefined;Polyphen-2: impact: undefined, score: undefined	Missense_Mutation		2	Somatic	NaN	broad.mit.edu	6	26252083	26252083	G	A				160			596
Skin Cutaneous Melanoma (Yale, Nat Genet 2012)	YUSUBA	Cutaneous Melanoma	E72K	OncoKB: NA;CIViC: NA;MyCancerGenome: not present;CancerHotspot: no;3DHotspot: yes	MutationAssessor: impact: high, score: 3.65;SIFT: impact: undefined, score: undefined;Polyphen-2: impact: undefined, score: undefined	Missense_Mutation		4	somatic	NA	yale.edu	6	26252092	26252092	G	A							112
Skin Cutaneous Melanoma (TCGA, Provisional)	TCGA-DA-A1HW-06	Cutaneous Melanoma	E72K	OncoKB: NA;CIViC: NA;MyCancerGenome: not present;CancerHotspot: no;3DHotspot: yes	MutationAssessor: impact: high, score: 3.65;SIFT: impact: undefined, score: undefined;Polyphen-2: impact: undefined, score: undefined	Missense_Mutation		4	Somatic	NA	broad.mit.edu	6	26252092	26252092	G	A			39	91			270
Pan-Lung Cancer (TCGA, Nat Genet 2016)	TCGA-49-AAR3-01	Lung Adenocarcinoma	E72Q	OncoKB: NA;CIViC: NA;MyCancerGenome: not present;CancerHotspot: no;3DHotspot: yes	MutationAssessor: impact: medium, score: 3.16;SIFT: impact: undefined, score: undefined;Polyphen-2: impact: undefined, score: undefined	Missense_Mutation		4	Somatic	NA	broad.mit.edu	6	26252092	26252092	G	C			4	143		142	140
TCGA data for Esophagus-Stomach Cancers (TCGA, Nature 2017)	TCGA-MX-A5UJ-01	Stomach Adenocarcinoma	E72Q	OncoKB: NA;CIViC: NA;MyCancerGenome: not present;CancerHotspot: no;3DHotspot: yes	MutationAssessor: impact: medium, score: 3.16;SIFT: impact: undefined, score: undefined;Polyphen-2: impact: undefined, score: undefined	Missense_Mutation		4	Somatic	Untested	genome.wustl.edu	6	26252092	26252092	G	C			31	173		165	1480
Head and Neck Squamous Cell Carcinoma (TCGA, Provisional)	TCGA-CV-6942-01	Head and Neck Squamous Cell Carcinoma	E72Q	OncoKB: NA;CIViC: NA;MyCancerGenome: not present;CancerHotspot: no;3DHotspot: yes	MutationAssessor: impact: medium, score: 3.16;SIFT: impact: undefined, score: undefined;Polyphen-2: impact: undefined, score: undefined	Missense_Mutation		4	Somatic	NA	broad.mit.edu	6	26252092	26252092	G	C			22	142			205
Ovarian Serous Cystadenocarcinoma (TCGA, Provisional)	TCGA-61-1998-01	Serous Ovarian Cancer	G76S	OncoKB: NA;CIViC: NA;MyCancerGenome: not present;CancerHotspot: no;3DHotspot: no	MutationAssessor: impact: neutral, score: -0.095;SIFT: impact: undefined, score: undefined;Polyphen-2: impact: undefined, score: undefined	Missense_Mutation			Unknown	Unknown	broad.mit.edu	6	26252104	26252104	G	A							106
Pan-Lung Cancer (TCGA, Nat Genet 2016)	TCGA-55-7907-01	Lung Adenocarcinoma	E77K	OncoKB: NA;CIViC: NA;MyCancerGenome: not present;CancerHotspot: no;3DHotspot: yes	MutationAssessor: impact: medium, score: 3.065;SIFT: impact: undefined, score: undefined;Polyphen-2: impact: undefined, score: undefined	Missense_Mutation		3	Somatic	NA	broad.mit.edu	6	26252107	26252107	G	A			36	83		130	997
Pan-Lung Cancer (TCGA, Nat Genet 2016)	TCGA-39-5034-01	Lung Squamous Cell Carcinoma	E77K	OncoKB: NA;CIViC: NA;MyCancerGenome: not present;CancerHotspot: no;3DHotspot: yes	MutationAssessor: impact: medium, score: 3.065;SIFT: impact: undefined, score: undefined;Polyphen-2: impact: undefined, score: undefined	Missense_Mutation		3	Somatic	NA	broad.mit.edu	6	26252107	26252107	G	A			91	116	1	216	485
Pan-Lung Cancer (TCGA, Nat Genet 2016)	TCGA-66-2778-01	Lung Squamous Cell Carcinoma	E77K	OncoKB: NA;CIViC: NA;MyCancerGenome: not present;CancerHotspot: no;3DHotspot: yes	MutationAssessor: impact: medium, score: 3.065;SIFT: impact: undefined, score: undefined;Polyphen-2: impact: undefined, score: undefined	Missense_Mutation		3	Somatic	NA	broad.mit.edu	6	26252107	26252107	G	A			8	197		225	121
Bladder Cancer (TCGA, Cell 2017)	TCGA-KQ-A41R-01	Bladder Urothelial Carcinoma	E77K	OncoKB: NA;CIViC: NA;MyCancerGenome: not present;CancerHotspot: no;3DHotspot: yes	MutationAssessor: impact: medium, score: 3.065;SIFT: impact: undefined, score: undefined;Polyphen-2: impact: undefined, score: undefined	Missense_Mutation		3	Somatic	NaN	broad.mit.edu	6	26252107	26252107	G	A				159			665
Breast Invasive Carcinoma (TCGA, Provisional)	TCGA-AC-A23H-01	Breast Invasive Ductal Carcinoma	E77K	OncoKB: NA;CIViC: NA;MyCancerGenome: not present;CancerHotspot: no;3DHotspot: yes	MutationAssessor: impact: medium, score: 3.065;SIFT: impact: undefined, score: undefined;Polyphen-2: impact: undefined, score: undefined	Missense_Mutation		3	Somatic	Untested	genome.wustl.edu	6	26252107	26252107	G	A			49	38			3412
Cutaneous Squamous Cell Carcinoma (MD Anderson, Clin Cancer Res 2014)	CSCC-49-T	Cutaneous Squamous Cell Carcinoma	A82T	OncoKB: NA;CIViC: NA;MyCancerGenome: not present;CancerHotspot: no;3DHotspot: no		Missense_Mutation			Somatic	Untested	hgsc.bcm.edu	6	26252121	26252122	GG	AA							3349
Prostate Adenocarcinoma (MSKCC/DFCI, Nature Genetics 2018)	TCGA-CH-5737-01	Prostate Adenocarcinoma	K86N	OncoKB: NA;CIViC: NA;MyCancerGenome: not present;CancerHotspot: no;3DHotspot: no	MutationAssessor: impact: medium, score: 2.175;SIFT: impact: undefined, score: undefined;Polyphen-2: impact: undefined, score: undefined	Missense_Mutation		1	NA	NA	broad.mit.edu	6	26252136	26252136	G	T			15	167			69
Mesothelioma (TCGA, Provisional)	TCGA-3H-AB3L-01	Pleural Mesothelioma, Epithelioid Type	R93K	OncoKB: NA;CIViC: NA;MyCancerGenome: not present;CancerHotspot: no;3DHotspot: no	MutationAssessor: impact: medium, score: 3.22;SIFT: impact: undefined, score: undefined;Polyphen-2: impact: undefined, score: undefined	Missense_Mutation			Somatic	NA	broad.mit.edu	6	26252156	26252156	G	A			68	183			37
Cutaneous Squamous Cell Carcinoma (MD Anderson, Clin Cancer Res 2014)	CSCC-41-T	Cutaneous Squamous Cell Carcinoma	E94K	OncoKB: NA;CIViC: NA;MyCancerGenome: not present;CancerHotspot: no;3DHotspot: no	MutationAssessor: impact: high, score: 3.915;SIFT: impact: undefined, score: undefined;Polyphen-2: impact: undefined, score: undefined	Missense_Mutation			Somatic	Untested	hgsc.bcm.edu	6	26252158	26252158	G	A			35	89		86	2266
TCGA data for Esophagus-Stomach Cancers (TCGA, Nature 2017)	TCGA-LN-A5U7-01	Esophageal Squamous Cell Carcinoma	E94Q	OncoKB: NA;CIViC: NA;MyCancerGenome: not present;CancerHotspot: no;3DHotspot: no	MutationAssessor: impact: high, score: 4.26;SIFT: impact: undefined, score: undefined;Polyphen-2: impact: undefined, score: undefined	Missense_Mutation			Somatic	Untested	mc2.edu	6	26252158	26252158	G	C			14	38		65	164
Pan-Lung Cancer (TCGA, Nat Genet 2016)	LUAD-5V8LT-Tumor	Lung Adenocarcinoma	V99L	OncoKB: NA;CIViC: NA;MyCancerGenome: not present;CancerHotspot: no;3DHotspot: no	MutationAssessor: impact: medium, score: 3.445;SIFT: impact: undefined, score: undefined;Polyphen-2: impact: undefined, score: undefined	Missense_Mutation			Somatic	NA	broad.mit.edu	6	26252173	26252173	G	C			19	95		135	1483
Pan-Lung Cancer (TCGA, Nat Genet 2016)	TCGA-50-5946-01	Lung Adenocarcinoma	L103V	OncoKB: NA;CIViC: NA;MyCancerGenome: not present;CancerHotspot: no;3DHotspot: no	MutationAssessor: impact: high, score: 3.655;SIFT: impact: undefined, score: undefined;Polyphen-2: impact: undefined, score: undefined	Missense_Mutation		2	Somatic	NA	broad.mit.edu	6	26252185	26252185	C	G			21	56		79	563
Skin Cutaneous Melanoma (Broad, Cell 2012)	MEL-13575	Cutaneous Melanoma	E106K	OncoKB: NA;CIViC: NA;MyCancerGenome: not present;CancerHotspot: no;3DHotspot: no	MutationAssessor: impact: medium, score: 2.915;SIFT: impact: undefined, score: undefined;Polyphen-2: impact: undefined, score: undefined	Missense_Mutation			NA	NA	broad.mit.edu	6	26252194	26252194	G	A							401
Pan-Lung Cancer (TCGA, Nat Genet 2016)	TCGA-64-5781-01	Lung Adenocarcinoma	E114K	OncoKB: NA;CIViC: NA;MyCancerGenome: not present;CancerHotspot: no;3DHotspot: no	MutationAssessor: impact: medium, score: 3.39;SIFT: impact: undefined, score: undefined;Polyphen-2: impact: undefined, score: undefined	Missense_Mutation		3	Somatic	NA	broad.mit.edu	6	26252218	26252218	G	A			8	46		64	984
Colorectal Adenocarcinoma (TCGA, Provisional)	TCGA-AG-4001-01	Rectal Adenocarcinoma	E114K	OncoKB: NA;CIViC: NA;MyCancerGenome: not present;CancerHotspot: no;3DHotspot: no	MutationAssessor: impact: medium, score: 3.39;SIFT: impact: undefined, score: undefined;Polyphen-2: impact: undefined, score: undefined	Missense_Mutation		3	Somatic	Unknown	broad.mit.edu	6	26252218	26252218	G	A							91
Breast Invasive Carcinoma (Sanger, Nature 2012)	PD4197a	Invasive Breast Carcinoma	E114Q	OncoKB: NA;CIViC: NA;MyCancerGenome: not present;CancerHotspot: no;3DHotspot: no	MutationAssessor: impact: medium, score: 3.25;SIFT: impact: undefined, score: undefined;Polyphen-2: impact: undefined, score: undefined	Missense_Mutation		3	Unknown	Unknown	Sanger	6	26252218	26252218	G	C							23
Cervical Squamous Cell Carcinoma and Endocervical Adenocarcinoma (TCGA, Provisional)	TCGA-DG-A2KK-01	Cervical Squamous Cell Carcinoma	E114Q	OncoKB: NA;CIViC: NA;MyCancerGenome: not present;CancerHotspot: no;3DHotspot: no	MutationAssessor: impact: medium, score: 3.25;SIFT: impact: undefined, score: undefined;Polyphen-2: impact: undefined, score: undefined	Missense_Mutation		3	Somatic	Untested	genome.wustl.edu	6	26252218	26252218	G	C				62		77	239
Head and Neck Squamous Cell Carcinoma (TCGA, Provisional)	TCGA-CR-7394-01	Head and Neck Squamous Cell Carcinoma	E114Q	OncoKB: NA;CIViC: NA;MyCancerGenome: not present;CancerHotspot: no;3DHotspot: no	MutationAssessor: impact: medium, score: 3.25;SIFT: impact: undefined, score: undefined;Polyphen-2: impact: undefined, score: undefined	Missense_Mutation		3	Somatic	NA	broad.mit.edu	6	26252218	26252218	G	C			4	87			152
Breast Invasive Carcinoma (British Columbia, Nature 2012)	SA106	Invasive Breast Carcinoma	T116A	OncoKB: NA;CIViC: NA;MyCancerGenome: not present;CancerHotspot: no;3DHotspot: no	MutationAssessor: impact: high, score: 3.71;SIFT: impact: undefined, score: undefined;Polyphen-2: impact: undefined, score: undefined	Missense_Mutation		1	NA	NA	BC	6	26252224	26252224	A	G							133
Chronic Lymphocytic Leukemia (IUOPA, Nature 2015)	cll_iuopa_2015_333	Chronic Lymphocytic Leukemia	S124N	OncoKB: NA;CIViC: NA;MyCancerGenome: not present;CancerHotspot: no;3DHotspot: no	MutationAssessor: impact: medium, score: 2.64;SIFT: impact: undefined, score: undefined;Polyphen-2: impact: undefined, score: undefined	Missense_Mutation			NA	NA	www.unioviedo.es/IUOPA/	6	26252249	26252249	G	A							12
TCGA data for Esophagus-Stomach Cancers (TCGA, Nature 2017)	TCGA-LN-A5U5-01	Esophageal Squamous Cell Carcinoma	S125C	OncoKB: NA;CIViC: NA;MyCancerGenome: not present;CancerHotspot: no;3DHotspot: no	MutationAssessor: impact: medium, score: 3.16;SIFT: impact: undefined, score: undefined;Polyphen-2: impact: undefined, score: undefined	Missense_Mutation			Somatic	Untested	genome.wustl.edu	6	26252252	26252252	C	G			21	20		78	58
Lung Adenocarcinoma (TCGA, PanCancer Atlas)	TCGA-17-Z045-01	Lung Adenocarcinoma	D3H	OncoKB: NA;CIViC: NA;MyCancerGenome: not present;CancerHotspot: no;3DHotspot: no	MutationAssessor: impact: neutral, score: 0.55;SIFT: impact: undefined, score: undefined;Polyphen-2: impact: undefined, score: undefined	Missense_Mutation		2	.	.	.	6	26251885	26251885	G	C	0.12		5	38		61	607	2019-01-01	ENST00000356350.2:c.7G>C
Skin Cutaneous Melanoma (TCGA, PanCancer Atlas)	TCGA-YD-A9TA-06	Cutaneous Melanoma	P9L	OncoKB: NA;CIViC: NA;MyCancerGenome: not present;CancerHotspot: no;3DHotspot: no	MutationAssessor: impact: medium, score: 2.25;SIFT: impact: undefined, score: undefined;Polyphen-2: impact: undefined, score: undefined	Missense_Mutation	shallowdel		.	.	.	6	26251904	26251904	C	T	0.71		40	16		77	2782	2019-01-01	ENST00000356350.2:c.26C>T
Ovarian Serous Cystadenocarcinoma (TCGA, PanCancer Atlas)	TCGA-13-0807-01	Serous Ovarian Cancer	A10V	OncoKB: NA;CIViC: NA;MyCancerGenome: not present;CancerHotspot: no;3DHotspot: no	MutationAssessor: impact: medium, score: 2.225;SIFT: impact: undefined, score: undefined;Polyphen-2: impact: undefined, score: undefined	Missense_Mutation	diploid		.	.	.	6	26251907	26251907	C	T	0.13		18	120		95	287	2019-01-01	ENST00000356350.2:c.29C>T
Breast Invasive Carcinoma (TCGA, PanCancer Atlas)	TCGA-GM-A2DO-01	Breast Invasive Lobular Carcinoma	S15Y	OncoKB: NA;CIViC: NA;MyCancerGenome: not present;CancerHotspot: no;3DHotspot: no	MutationAssessor: impact: medium, score: 2.65;SIFT: impact: undefined, score: undefined;Polyphen-2: impact: undefined, score: undefined	Missense_Mutation	diploid		.	.	.	6	26251922	26251922	C	A	0.09	0.01	11	106	1	145	141	2019-01-01	ENST00000356350.2:c.44C>A
Skin Cutaneous Melanoma (TCGA, PanCancer Atlas)	TCGA-WE-A8ZX-06	Cutaneous Melanoma	D26N	OncoKB: NA;CIViC: NA;MyCancerGenome: not present;CancerHotspot: no;3DHotspot: no	MutationAssessor: impact: medium, score: 2.565;SIFT: impact: undefined, score: undefined;Polyphen-2: impact: undefined, score: undefined	Missense_Mutation	gain	1	.	.	.	6	26251954	26251954	G	A	0.35		59	112		196	466	2019-01-01	ENST00000356350.2:c.76G>A
Uterine Corpus Endometrial Carcinoma (TCGA, PanCancer Atlas)	TCGA-AJ-A3BH-01	Uterine Endometrioid Carcinoma	R30C	OncoKB: NA;CIViC: NA;MyCancerGenome: not present;CancerHotspot: no;3DHotspot: no	MutationAssessor: impact: low, score: 1.06;SIFT: impact: undefined, score: undefined;Polyphen-2: impact: undefined, score: undefined	Missense_Mutation	diploid		.	.	.	6	26251966	26251966	C	T	0.27		23	62		112	2681	2019-01-01	ENST00000356350.2:c.88C>T
Metastatic Prostate Adenocarcinoma (SU2C/PCF Dream Team, PNAS 2019)	SC_9197_T	Prostate Adenocarcinoma	T53I	OncoKB: NA;CIViC: NA;MyCancerGenome: not present;CancerHotspot: no;3DHotspot: no	MutationAssessor: impact: low, score: 0.93;SIFT: impact: undefined, score: undefined;Polyphen-2: impact: undefined, score: undefined	Missense_Mutation	diploid		Somatic	Untested	broad.mit.edu	6	26252036	26252036	C	T	0.34		33	64			924	2019-01-01	ENST00000356350.2:c.158C>T
Breast Invasive Carcinoma (Sanger, Nature 2012)	PD4596a	Invasive Breast Carcinoma	M60I	OncoKB: NA;CIViC: NA;MyCancerGenome: not present;CancerHotspot: no;3DHotspot: no	MutationAssessor: impact: medium, score: 2.77;SIFT: impact: undefined, score: undefined;Polyphen-2: impact: undefined, score: undefined	Missense_Mutation		1	Unknown	Unknown	Sanger	6	26252058	26252058	G	A							132	2019-01-01	ENST00000356350.2:c.180G>A
Uterine Corpus Endometrial Carcinoma (TCGA, PanCancer Atlas)	TCGA-EY-A1GS-01	Uterine Serous Carcinoma/Uterine Papillary Serous Carcinoma	D69N	OncoKB: NA;CIViC: NA;MyCancerGenome: not present;CancerHotspot: no;3DHotspot: no	MutationAssessor: impact: medium, score: 3.35;SIFT: impact: undefined, score: undefined;Polyphen-2: impact: undefined, score: undefined	Missense_Mutation	shallowdel	2	.	.	.	6	26252083	26252083	G	A	0.24		10	31		72	352	2019-01-01	ENST00000356350.2:c.205G>A
Breast Invasive Carcinoma (TCGA, PanCancer Atlas)	TCGA-3C-AALI-01	Breast Invasive Ductal Carcinoma	D69N	OncoKB: NA;CIViC: NA;MyCancerGenome: not present;CancerHotspot: no;3DHotspot: no	MutationAssessor: impact: medium, score: 3.35;SIFT: impact: undefined, score: undefined;Polyphen-2: impact: undefined, score: undefined	Missense_Mutation	diploid	2	.	.	.	6	26252083	26252083	G	A	0.21		29	108		94	458	2019-01-01	ENST00000356350.2:c.205G>A
Uterine Corpus Endometrial Carcinoma (TCGA, PanCancer Atlas)	TCGA-EO-A22T-01	Uterine Endometrioid Carcinoma	R73C	OncoKB: NA;CIViC: NA;MyCancerGenome: not present;CancerHotspot: no;3DHotspot: no	MutationAssessor: impact: medium, score: 2.63;SIFT: impact: undefined, score: undefined;Polyphen-2: impact: undefined, score: undefined	Missense_Mutation	diploid		.	.	.	6	26252095	26252095	C	T	0.29		21	52		101	992	2019-01-01	ENST00000356350.2:c.217C>T
Uterine Corpus Endometrial Carcinoma (TCGA, PanCancer Atlas)	TCGA-EY-A1GS-01	Uterine Serous Carcinoma/Uterine Papillary Serous Carcinoma	E77Q	OncoKB: NA;CIViC: NA;MyCancerGenome: not present;CancerHotspot: no;3DHotspot: no	MutationAssessor: impact: high, score: 3.615;SIFT: impact: undefined, score: undefined;Polyphen-2: impact: undefined, score: undefined	Missense_Mutation	shallowdel	3	.	.	.	6	26252107	26252107	G	C	0.23		7	24		61	352	2019-01-01	ENST00000356350.2:c.229G>C
Breast Invasive Carcinoma (TCGA, PanCancer Atlas)	TCGA-AC-A6IW-01	Breast Invasive Ductal Carcinoma	E77Q	OncoKB: NA;CIViC: NA;MyCancerGenome: not present;CancerHotspot: no;3DHotspot: no	MutationAssessor: impact: high, score: 3.615;SIFT: impact: undefined, score: undefined;Polyphen-2: impact: undefined, score: undefined	Missense_Mutation	gain	3	.	.	.	6	26252107	26252107	G	C	0.11		14	114		74	131	2019-01-01	ENST00000356350.2:c.229G>C
MSS Mixed Solid Tumors (Broad/Dana-Farber, Nat Genet 2018)	MEL-IPI_Pat21-Tumor-SM-4DK1H	Cutaneous Melanoma	P104L	OncoKB: NA;CIViC: NA;MyCancerGenome: not present;CancerHotspot: no;3DHotspot: no	MutationAssessor: impact: medium, score: 3.32;SIFT: impact: undefined, score: undefined;Polyphen-2: impact: undefined, score: undefined	Missense_Mutation			NA	NA	NA	6	26252189	26252189	C	T	0.09		25	258			1428	2019-01-01	ENST00000356350.2:c.311C>T
Cervical Squamous Cell Carcinoma (TCGA, PanCancer Atlas)	TCGA-EK-A2RJ-01	Cervical Squamous Cell Carcinoma	A111T	OncoKB: NA;CIViC: NA;MyCancerGenome: not present;CancerHotspot: no;3DHotspot: no	MutationAssessor: impact: medium, score: 3.4;SIFT: impact: undefined, score: undefined;Polyphen-2: impact: undefined, score: undefined	Missense_Mutation	gain		.	.	.	6	26252209	26252209	G	A	0.2		17	69		65	336	2019-01-01	ENST00000356350.2:c.331G>A
MSS Mixed Solid Tumors (Broad/Dana-Farber, Nat Genet 2018)	MEL-IPI_Pat117-Tumor-SM-5X2QU	Cutaneous Melanoma	A118V	OncoKB: NA;CIViC: NA;MyCancerGenome: not present;CancerHotspot: no;3DHotspot: no	MutationAssessor: impact: high, score: 3.58;SIFT: impact: undefined, score: undefined;Polyphen-2: impact: undefined, score: undefined	Missense_Mutation			NA	NA	NA	6	26252231	26252231	C	T	0.18		42	190			708	2019-01-01	ENST00000356350.2:c.353C>T

[truncated: 10 more sheets: HIST1H2BI, HIST1H2BJ, HIST1H2BK, HIST1H2BL, HIST1H2BM, HIST1H2BN, HIST1H2BO, HIST2H2BE, HIST2H2BF, HIST3H2BB]
