# Supplementary material for: A Mutation in Histone H2B Represents a New Class of Oncogenic Driver
Source: Oxford University Press journal article supplement (doi:10.1158/2159-8290.cd-19-0393), 2019-07-23
Supplement: 21598290cd190393-sup-219971_2_supp_5628449_py53k9.xlsx [file 21598290cd190393-sup-219971_2_supp_5628449_py53k9.xlsx]

## Sheet: H4 Summary
H4 paralog missense mutation summary					2019-05-31											Average # mutations:		6.73529		total H4 missense mutations			687
																Std deviation:		4.11452
cbioportal aa position	H4A	H4B	H4C	H4D	H4E	H4F	H4G	H4H	H4I	H4J	H4K	H4L	HIST2H4A	HIST4H4		total patients with mutation	AA Positions	Z score
1																0	0	-1.63415
2	2	1			2		1	2			1	1	1	1		12	1	1.29268
3				2		1				2	1					6	2	-0.170732
4		2	2	2	2	2	4		1	3	3	1	1	1		24	3	4.21951
5	1	2			4					2	3	1	1			14	4	1.78049
6	1					1		1								3	5	-0.902439
7						1							1			2	6	-1.14634
8			1	2		1		1		2	1					8	7	0.317073
9				2	1				1		1					5	8	-0.414634
10			1	1	3	1			1							7	9	0.0731707
11			1									1		1		3	10	-0.902439
12	1	1		1			1		1		1	1				7	11	0.0731707
13		1							1		1	1				4	12	-0.658537
14		1	2		1			1				1				6	13	-0.170732
15	2			3		1	4			1			1			12	14	1.29268
16				1				2	1		2			1		7	15	0.0731707
17		1						1			1	1				4	16	-0.658537
18				2	2	2			3		3	4				16	17	2.26829
19			1	1				1			1	1		1		6	18	-0.170732
20		1		1	3	1	2				1	2				11	19	1.04878
21				1			1									2	20	-1.14634
22		1		1			1									3	21	-0.902439
23							2							2		4	22	-0.658537
24			1				1			1						3	23	-0.902439
25		1	1		2	1	2				1	1		2		11	24	1.04878
26		1		1	2		2		1							7	25	0.0731707
27				2				2			1					5	26	-0.414634
28	1	2					1					2				6	27	-0.170732
29	1		2			1			2	1	1		1	2		11	28	1.04878
30	2			1	1	1										5	29	-0.414634
31				1		1		2		1		1	1			7	30	0.0731707
32				1						1			1			3	31	-0.902439
33		1														1	32	-1.39024
34	1		2	2		1		1		1				1		9	33	0.560976
35			1	1	1					1			1			5	34	-0.414634
36		2			1	2	2		3			1				11	35	1.04878
37		2			1	1	1		1			1		1		8	36	0.317073
38		2			2											4	37	-0.658537
39		1	3					1				1				6	38	-0.170732
40			1	2	1	1	1	2						1		9	39	0.560976
41		1					1		2		1	1	1			7	40	0.0731707
42			2	1				1	1							5	41	-0.414634
43	1			1	1		2	8		1		1	1			16	42	2.26829
44									1							1	43	-1.39024
45			1	1					1							3	44	-0.902439
46		9			1	1										11	45	1.04878
47	1				1		1									3	46	-0.902439
48	1		1	2					1			2				7	47	0.0731707
49		1	1	1		2			1							6	48	-0.170732
50		3	1	1	1					1				1		8	49	0.317073
51			2	1	2			3	1	1						10	50	0.804878
52							2	2								4	51	-0.658537
53		1	1		1		1		1	1	6		1	1		14	52	1.78049
54		2		1	1				1		1	1				7	53	0.0731707
55		1														1	54	-1.39024
56	1	1	1		2	1	1		1				1			9	55	0.560976
57			1	1		2	4		2							10	56	0.804878
58				2	1		1		1			1		1		7	57	0.0731707
59		1				1				1			1	1		5	58	-0.414634
60		1										2				3	59	-0.902439
61	1	2			3		1	1			1	1				10	60	0.804878
62					2				1	1	1	1				6	61	-0.170732
63																0	62	-1.63415
64				2	1	1		1	3	1	2	1		1		13	63	1.53659
65			1								1			1		3	64	-0.902439
66					1			1				1		1		4	65	-0.658537
67							2									2	66	-1.14634
68		1	6			3				1			1			12	67	1.29268
69	1	1	1	3	3	1	3				4	3	1	1		22	68	3.73171
70	1	2		1			1	2								7	69	0.0731707
71						2	3			1						6	70	-0.170732
72		1			2				1	1		1		1		7	71	0.0731707
73	2	1							2							5	72	-0.414634
74				1	1				1	2	1					6	73	-0.170732
75				1		1		2	1	1				1		7	74	0.0731707
76		1			1				2							4	75	-0.658537
77		1			3	1							1			6	76	-0.170732
78				1			1									2	77	-1.14634
79		1			1	1	2			1						6	78	-0.170732
80		1		1	2						2			1		7	79	0.0731707
81		2	1		1						1					5	80	-0.414634
82		2		1									1			4	81	-0.658537
83				1				1		1	1					4	82	-0.658537
84			1	3		1	2		1			1				9	83	0.560976
85									1	1		2				4	84	-0.658537
86		2			1						1	1		1		6	85	-0.170732
87							4		2		2					8	86	0.317073
88			1					1	1		1	1	1	1		7	87	0.0731707
89		1	1													2	88	-1.14634
90	1				2		1	1	2		2					9	89	0.560976
91	1				1											2	90	-1.14634
92		1			3											4	91	-0.658537
93	1		1	1	4	2	3	1								13	92	1.53659
94			1			1	1									3	93	-0.902439
95				1	3	1					2			1		8	94	0.317073
96				1	1	3	2	1		1	1		1			11	95	1.04878
97					1	1	2	1				1				6	96	-0.170732
98					2		1	1					1			5	97	-0.414634
99				2						1						3	98	-0.902439
100			1			1			2	1				2		7	99	0.0731707
101			1	1	1				1							4	100	-0.658537
102				2					1		2					5	101	-0.414634
103	1	1		1				1	2	1		1	1			9	102	0.560976
somatic mutation freq (%):	0.2	0.1	0.2	0.2	0.1	0.1	0.1	0.1	0.1	0.2	0.1	0.1	0.1

## Sheet: H4-dbSNP report
dbSNP search for H4 SNPs that occur at R3, G42, D68, R92				Date of Search: 5/25/2019 and 6/1/19
https://www.ncbi.nlm.nih.gov/variation/view/?q=HIST1H4
search for HIST1H4A/B/C/D/E/F/G/H/I/J/K/L, HIST2H4A, HIST4H4							Mutant	Variant ID	location (GRCh38.p12)	Paralog	Base change	AA change	Link to dbSNP reference report	frequency (TOPMED)	Frequency (GnomAD)	Frequency (ExAC)
							D68E	rs757570489	chr6:26285293	HIST1H4H	NM_003543.3:c.207C>A D [GAC] > E [GAA]	NP_003534.1:p.Asp69Glu	https://www.ncbi.nlm.nih.gov/snp/rs757570489		2.43651e-05
AA Position	Cumulative Frequency in dbSNP			Average frequency	Frequency in cancer		D68E	rs758089807	chr12:14770878	HIST4H4	NM_175054.2:c.207C>A D [GAC] > E [GAA]	NP_778224.1:p.Asp69Glu	https://www.ncbi.nlm.nih.gov/snp/rs758089807
R3*	0.00033448	0.000374632	0.000176225	0.000295112	0.000575016		D68H	rs752898898	chr6:26240630	HIST1H4F			https://www.ncbi.nlm.nih.gov/snp/rs752898898		4.06332e-06
R3C	6.37105e-05	7.80516e-05	4.62457e-05	6.26693e-05	0.000287508		D68N	rs1307469214	chr6:26021883	HIST1H4A	NM_003538.3:c.205G>A D [GAC] > N [AAC]	NP_003529.1:p.Asp69Asn	https://www.ncbi.nlm.nih.gov/snp/rs1307469214		4.06075e-06
R3G	0.000215023	0.000145121	4.11311e-05	0.000133758	7.18769e-05		D68N	rs1037257552	chr6:27139513	HIST1H4I	NM_003495.2:c.205G>A D [GAC] > N [AAC]	NP_003486.1:p.Asp69Asn	https://www.ncbi.nlm.nih.gov/snp/rs1037257552	1.59276e-05
R3H	1.59276e-05	1.73222e-05	3.67262e-05	2.33253e-05	2.3959e-05		D68N	rs752898898	chr6:26240630	HIST1H4F	NM_003540.3:c.205G>A D [GAC] > N [AAC]	NP_003531.1:p.Asp69Asn	https://www.ncbi.nlm.nih.gov/snp/rs752898898		4.06332e-06	8.27376e-06
R3I			9.09769e-06	9.09769e-06			D68Y	rs565829180	chr6:26027048	HIST1H4B	NM_003544.2:c.205G>T D [GAC] > Y [TAC]	NP_003535.1:p.Asp69Tyr	https://www.ncbi.nlm.nih.gov/snp/rs565829180
R3L		1.23603e-05	8.47788e-06	1.04191e-05	7.18769e-05		G42A	rs1051022087	chr12:14770957	HIST4H4	NM_175054.2:c.128G>C G [GGC] > A [GCC]	NP_778224.1:p.Gly43Ala	https://www.ncbi.nlm.nih.gov/snp/rs1051022087	1.59276e-05
R3K		3.22726e-05		3.22726e-05	4.7918e-05		G42C	rs761825882	chr6:27824251	HIST1H4J	NM_021968.3:c.127G>T G [GGC] > C [TGC]	NP_068803.1:p.Gly43Cys	https://www.ncbi.nlm.nih.gov/snp/rs761825882
R3P	3.18552e-05	5.72316e-05	3.45462e-05	4.1211e-05			G42D	rs1304286361	chr6:26285372	HIST1H4H	NM_003543.3:c.128G>A G [GGT] > D [GAT]	NP_003534.1:p.Gly43Asp	https://www.ncbi.nlm.nih.gov/snp/rs1304286361		4.0625e-06
R3Q					4.7918e-05		G42S	rs983991408	chr6:26240552	HIST1H4F	NM_003540.3:c.127G>A G [GGC] > S [AGC]	NP_003531.1:p.Gly43Ser	https://www.ncbi.nlm.nih.gov/snp/rs983991408		4.06388e-06
R3T		3.22726e-05		3.22726e-05			G42S	rs777282065	chr6:27831401	HIST1H4K	NM_003541.2:c.127G>A G [GGC] > S [AGC]	NP_003532.1:p.Gly43Ser	https://www.ncbi.nlm.nih.gov/snp/rs777282065		4.96047e-06	1.2315e-05
R3W	7.96381e-06			7.96381e-06	2.3959e-05		R17C	rs781597714	chr6:26027201	HIST1H4B	NM_003544.2:c.52C>T R [CGT] > C [TGT]	NP_003535.1:p.Arg18Cys	https://www.ncbi.nlm.nih.gov/snp/rs781597714		1.21853e-05	8.2545e-06
R17*	7.96381e-06	0.000153094	6.03326e-05	7.37967e-05	0.000383344		R17C	rs776145717	chr6:26204696	HIST1H4E	NM_003545.3:c.52C>T R [CGT] > C [TGT]	NP_003536.1:p.Arg18Cys	https://www.ncbi.nlm.nih.gov/snp/rs776145717			8.25287e-06
R17C	7.96381e-06	1.62495e-05	2.47973e-05	1.63369e-05	0.000143754		R17C	rs1403757246	chr6:26240477	HIST1H4F	NM_003540.3:c.52C>T R [CGC] > C [TGC]	NP_003531.1:p.Arg18Cys	https://www.ncbi.nlm.nih.gov/snp/rs1403757246	7.96381e-06
R17G					2.3959e-05		R17C	rs575069462	chr12:14771033	HIST4H4	NM_175054.2:c.52C>T R [CGC] > C [TGC]	NP_778224.1:p.Arg18Cys	https://www.ncbi.nlm.nih.gov/snp/rs575069462			8.28995e-06
R17H		2.37298e-05	8.25437e-06	1.59921e-05	0.000143754		R17C	rs757621417	chr6:26103999	HIST1H4C	NM_003542.3:c.52C>A R [CGC] > S [AGC]	NP_003533.1:p.Arg18Ser	https://www.ncbi.nlm.nih.gov/snp/rs757621417		4.06415e-06
R17L		8.13154e-06		8.13154e-06	4.7918e-05		R17H	rs1276622543	chr6:26021731	HIST1H4A	NM_003538.3:c.53G>A R [CGC] > H [CAC]	NP_003529.1:p.Arg18His	https://www.ncbi.nlm.nih.gov/snp/rs1276622543		4.0713e-06
R17P		0.000100919	8.24226e-06	5.45806e-05	2.3959e-05		R17H	rs769568169	chr12:14771032	HIST4H4			https://www.ncbi.nlm.nih.gov/snp/rs769568169		7.47295e-06
R17S		4.06415e-06	1.90387e-05	1.15514e-05			R17H	rs757590972	chr6:26027200	HIST1H4B	NM_003544.2:c.53G>C R [CGT] > P [CCT]	NP_003535.1:p.Arg18Pro	https://www.ncbi.nlm.nih.gov/snp/rs757590972		1.21855e-05	8.25437e-06
G42*	1.59276e-05	1.30868e-05	1.2315e-05	1.37765e-05	0.000383344		R17L	rs769568169	chr12:14771032	HIST4H4	NM_175054.2:c.53G>T R [CGC] > L [CTC]	NP_778224.1:p.Arg18Leu	https://www.ncbi.nlm.nih.gov/snp/rs769568169		8.13154e-06
G42A	1.59276e-05			1.59276e-05	2.3959e-05		R17P	rs752107532	chr6:26285447	HIST1H4H	NM_003543.3:c.53G>C R [CGT] > P [CCT]	NP_003534.1:p.Arg18Pro	https://www.ncbi.nlm.nih.gov/snp/rs752107532			8.24226e-06
G42C							R17P	rs1395711427	chr6:27139361	HIST1H4I	NM_003495.2:c.53G>C R [CGC] > P [CCC]	NP_003486.1:p.Arg18Pro	https://www.ncbi.nlm.nih.gov/snp/rs1395711427		4.06967e-06
G42D		4.0625e-06		4.0625e-06	4.7918e-05		R17P	rs757590972	chr6:26027200	HIST1H4B	NM_003544.2:c.53G>C R [CGT] > P [CCT]	NP_003535.1:p.Arg18Pro	https://www.ncbi.nlm.nih.gov/snp/rs757590972		9.68492e-05
G42R					0.000143754		R17S	rs779884461	chr6:27831476	HIST1H4K	NM_003541.2:c.52C>A R [CGC] > S [AGC]	NP_003532.1:p.Arg18Ser	https://www.ncbi.nlm.nih.gov/snp/rs779884461			1.07807e-05
G42S		9.02435e-06	1.2315e-05	1.06697e-05	4.7918e-05		R17S	rs757621417	chr6:26103999	HIST1H4C	NM_003542.3:c.52C>A R [CGC] > S [AGC]	NP_003533.1:p.Arg18Ser	https://www.ncbi.nlm.nih.gov/snp/rs757621417		4.06415e-06	8.25791e-06
G42V					0.000119795		R3C	rs774444664	chr6:26027243	HIST1H4B	NM_003544.2:c.10C>T R [CGC] > C [TGC]	NP_003535.1:p.Arg4Cys	https://www.ncbi.nlm.nih.gov/snp/rs774444664	2.38914e-05	2.45503e-05	2.54747e-05
D68*	1.59276e-05	3.65525e-05	8.27376e-06	2.02513e-05	0.000527098		R3C	rs746126019	chr6:26103957	HIST1H4C	NM_003542.3:c.10C>T R [CGC] > C [TGC]	NP_003533.1:p.Arg4Cys	https://www.ncbi.nlm.nih.gov/snp/rs746126019	7.96381e-06
D68E		2.43651e-05		2.43651e-05			R3C	rs374472052	chr6:27824134	HIST1H4J	NM_021968.3:c.10C>T R [CGC] > C [TGC]	NP_068803.1:p.Arg4Cys	https://www.ncbi.nlm.nih.gov/snp/rs374472052	7.96381e-06	1.63502e-05	2.0771e-05
D68F					2.3959e-05		R3C	rs1175611644	chr6:27873501	HIST1H4L	NM_003546.2:c.10C>T R [CGC] > C [TGC]	NP_003537.1:p.Arg4Cys	https://www.ncbi.nlm.nih.gov/snp/rs1175611644	1.59276e-05
D68G					2.3959e-05		R3C	rs140430462	chr6:26189067	HIST1H4D	NM_003539.3:c.10C>T R [CGC] > C [TGC]	NP_003530.1:p.Arg4Cys	https://www.ncbi.nlm.nih.gov/snp/rs140430462		2e-05
D68H		4.06332e-06		4.06332e-06	0.000191672		R3C	rs563257632	chr6:26285490	HIST1H4H	NM_003543.3:c.10C>T R [CGT] > C [TGT]	NP_003534.1:p.Arg4Cys	https://www.ncbi.nlm.nih.gov/snp/rs563257632		7.66272e-06
D68N	1.59276e-05	8.12407e-06	8.27376e-06	1.07752e-05	0.000191672		R3C	rs772156373	chr6:27831518	HIST1H4K	NM_003541.2:c.10C>T R [CGC] > C [TGC]	NP_003532.1:p.Arg4Cys	https://www.ncbi.nlm.nih.gov/snp/rs772156373	7.96381e-06	9.48839e-06
D68Y					9.58359e-05		R3G	rs140430462	chr6:26189067	HIST1H4D			https://www.ncbi.nlm.nih.gov/snp/rs140430462	0.000183168	7.91049e-05
							R3G	rs563257632	chr6:26285490	HIST1H4H			https://www.ncbi.nlm.nih.gov/snp/rs563257632	7.96381e-06	2.4863e-05	3.22726e-05
							R3G	rs772156373	chr6:27831518	HIST1H4K			https://www.ncbi.nlm.nih.gov/snp/rs772156373
							R3G	rs1252558992	chr6:26240435	HIST1H4F	NM_003540.3:c.10A>G R [AGA] > G [GGA]	NP_003531.1:p.Arg4Gly	https://www.ncbi.nlm.nih.gov/snp/rs1252558992		4.68481e-06
							R3G	rs751062963	chr6:27139318	HIST1H4I	NM_003495.2:c.10C>G R [CGC] > G [GGC]	NP_003486.1:p.Arg4Gly	https://www.ncbi.nlm.nih.gov/snp/rs751062963		4.15987e-06	8.85849e-06
							R3G	rs1019994955	chr6:26246968	HIST1H4G	NM_003547.2:c.10C>T R [CGG] > W [TGG]	NP_003538.1:p.Arg4Trp	https://www.ncbi.nlm.nih.gov/snp/rs1019994955	2.38914e-05	3.23081e-05
							R3H	rs754692167	chr6:26285489	HIST1H4H	NM_003543.3:c.11G>A R [CGT] > H [CAT]	NP_003534.1:p.Arg4His	https://www.ncbi.nlm.nih.gov/snp/rs754692167			8.4917e-06
							R3H	rs757221402	chr6:27139319	HIST1H4I	NM_003495.2:c.11G>A R [CGC] > H [CAC]	NP_003486.1:p.Arg4His	https://www.ncbi.nlm.nih.gov/snp/rs757221402		4.14927e-06	8.82768e-06
							R3H	rs781671939	chr6:27824135	HIST1H4J	NM_021968.3:c.11G>A R [CGC] > H [CAC]	NP_068803.1:p.Arg4His	https://www.ncbi.nlm.nih.gov/snp/rs781671939			1.06367e-05
							R3H	rs749571332	chr6:26027242	HIST1H4B			https://www.ncbi.nlm.nih.gov/snp/rs749571332	7.96381e-06
							R3H	rs754328775	chr6:26189066	HIST1H4D			https://www.ncbi.nlm.nih.gov/snp/rs754328775	7.96381e-06	1.31729e-05	8.77008e-06
							R3I	rs370419237	chr6:26240436	HIST1H4F			https://www.ncbi.nlm.nih.gov/snp/rs370419237			9.09769e-06
							R3K	rs370419237	chr6:26240436	HIST1H4F	NM_003540.3:c.11G>A R [AGA] > K [AAA]	NP_003531.1:p.Arg4Lys	https://www.ncbi.nlm.nih.gov/snp/rs370419237		3.22726e-05
							R3L	rs757221402	chr6:27139319	HIST1H4I			https://www.ncbi.nlm.nih.gov/snp/rs757221402		4.14927e-06
							R3L	rs747356743	chr6:27873500	HIST1H4L	NM_003546.2:c.11G>T R [CGC] > L [CTC]	NP_003537.1:p.Arg4Leu	https://www.ncbi.nlm.nih.gov/snp/rs747356743		8.21106e-06	8.47788e-06
							R3P	rs781671939	chr6:27824135	HIST1H4J			https://www.ncbi.nlm.nih.gov/snp/rs781671939	7.96381e-06	3.24929e-05
							R3P	rs753149266	chr6:26021689	HIST1H4A	NM_003538.3:c.11G>C R [CGT] > P [CCT]	NP_003529.1:p.Arg4Pro	https://www.ncbi.nlm.nih.gov/snp/rs753149266	2.38914e-05	1.68241e-05	1.75858e-05
							R3P	rs749571332	chr6:26027242	HIST1H4B	NM_003544.2:c.11G>C R [CGC] > P [CCC]	NP_003535.1:p.Arg4Pro	https://www.ncbi.nlm.nih.gov/snp/rs749571332			1.69604e-05
							R3P	rs754328775	chr6:26189066	HIST1H4D	NM_003539.3:c.11G>C R [CGC] > P [CCC]	NP_003530.1:p.Arg4Pro	https://www.ncbi.nlm.nih.gov/snp/rs754328775		7.91465e-06
							R3T	rs370419237	chr6:26240436	HIST1H4F			https://www.ncbi.nlm.nih.gov/snp/rs370419237		3.22726e-05
							R3W	rs1019994955	chr6:26246968	HIST1H4G	NM_003547.2:c.10C>T R [CGG] > W [TGG]	NP_003538.1:p.Arg4Trp	https://www.ncbi.nlm.nih.gov/snp/rs1019994955	7.96381e-06
							R92C	rs1337492576	chr6:26026976	HIST1H4B	NM_003544.2:c.277C>T R [CGT] > C [TGT]	NP_003535.1:p.Arg93Cys	https://www.ncbi.nlm.nih.gov/snp/rs1337492576		4.06878e-06
							R92C	rs1461843662	chr6:26246701	HIST1H4G	NM_003547.2:c.277C>T R [CGC] > C [TGC]	NP_003538.1:p.Arg93Cys	https://www.ncbi.nlm.nih.gov/snp/rs1461843662		4.12194e-06
							R92C	rs745864614	chr6:27139585	HIST1H4I	NM_003495.2:c.277C>T R [CGC] > C [TGC]	NP_003486.1:p.Arg93Cys	https://www.ncbi.nlm.nih.gov/snp/rs745864614		4.08363e-06	8.37226e-06
							R92G/S	rs753279577	chr6:27873234	HIST1H4L	NM_003546.2:c.277C>G R [CGC] > G [GGC]	NP_003537.1:p.Arg93Gly	https://www.ncbi.nlm.nih.gov/snp/rs753279577	7.96381e-06	4.06154e-06	8.2481e-06
							R92H	rs1277696024	chr6:26026975	HIST1H4B	NM_003544.2:c.278G>A R [CGT] > H [CAT]	NP_003535.1:p.Arg93His	https://www.ncbi.nlm.nih.gov/snp/rs1277696024		4.07034e-06
							R92H	rs1275347395	chr6:26104225	HIST1H4C	NM_003542.3:c.278G>A R [CGT] > H [CAT]	NP_003533.1:p.Arg93His	https://www.ncbi.nlm.nih.gov/snp/rs1275347395		3.2281e-05
							R92H	rs906388344	chr6:27139586	HIST1H4I	NM_003495.2:c.278G>A R [CGC] > H [CAC]	NP_003486.1:p.Arg93His	https://www.ncbi.nlm.nih.gov/snp/rs906388344	3.98191e-05	8.16693e-06
							R92H	rs200412707	chr6:27873233	HIST1H4L	NM_003546.2:c.278G>A R [CGC] > H [CAC]	NP_003537.1:p.Arg93His	https://www.ncbi.nlm.nih.gov/snp/rs200412707
							R92K	rs755041622	chr6:26204922	HIST1H4E	NM_003545.3:c.278G>A R [AGA] > K [AAA]	NP_003536.1:p.Arg93Lys	https://www.ncbi.nlm.nih.gov/snp/rs755041622	7.96381e-06		8.25205e-06
							R92L	rs904561156	chr6:26021956	HIST1H4A	NM_003538.3:c.278G>T R [CGC] > L [CTC]	NP_003529.1:p.Arg93Leu	https://www.ncbi.nlm.nih.gov/snp/rs904561156	3.98191e-05	8.28295e-06
							R92L	rs1404473159	chr6:26240703	HIST1H4F	NM_003540.3:c.278G>T R [CGC] > L [CTC]	NP_003531.1:p.Arg93Leu	https://www.ncbi.nlm.nih.gov/snp/rs1404473159		4.26563e-06
							R92L/H	rs981889855	chr12:14770807	HIST4H4	NM_175054.2:c.278G>T R [CGC] > L [CTC]	NP_778224.1:p.Arg93Leu	https://www.ncbi.nlm.nih.gov/snp/rs981889855
							R92Q	rs778406079	chr6:26285222	HIST1H4H	NM_003543.3:c.278G>A R [CGA] > Q [CAA]	NP_003534.1:p.Arg93Gln	https://www.ncbi.nlm.nih.gov/snp/rs778406079		4.08237e-06
							R92S	rs1269274030	chr6:26204923	HIST1H4E	NM_003545.3:c.279A>C R [AGA] > S [AGC]	NP_003536.1:p.Arg93Ser	https://www.ncbi.nlm.nih.gov/snp/rs1269274030		3.22956e-05
							R92S	rs201947121	chr6:27831251	HIST1H4K	NM_003541.2:c.277C>A R [CGC] > S [AGC]	NP_003532.1:p.Arg93Ser	https://www.ncbi.nlm.nih.gov/snp/rs201947121
							Y68D	rs1356908389	chr6:26246773	HIST1H4G	NM_003547.2:c.205T>G Y [TAC] > D [GAC]	NP_003538.1:p.Tyr69Asp	https://www.ncbi.nlm.nih.gov/snp/rs1356908389		8.12222e-06
							Y68F/C	rs776758136	chr6:26246772	HIST1H4G	NM_003547.2:c.206A>T Y [TAC] > F [TTC]	NP_003538.1:p.Tyr69Phe	https://www.ncbi.nlm.nih.gov/snp/rs776758136	7.96381e-06	8.12222e-06	2.47451e-05

## Sheet: HIST1H4A
Study	Sample ID	Cancer Type	Protein Change	Annotation	Functional Impact	Mutation Type	Copy #	COSMIC	MS	VS	Center	Chromosome	Start Pos	End Pos	Ref	Var	Allele Freq (T)	Allele Freq (N)	Variant Reads	Ref Reads	Variant Reads (N)	Ref Reads (N)	# Mut in Sample
Bladder Urothelial Carcinoma (Dana Farber & MSKCC, Cancer Discov 2014)	DFCI-38_NR	Bladder Urothelial Carcinoma	S2C	OncoKB: NA;CIViC: NA;MyCancerGenome: not present;CancerHotspot: no;3DHotspot: no	MutationAssessor: Error;SIFT: impact: undefined, score: undefined;Polyphen-2: impact: undefined, score: undefined	Missense_Mutation			NA	NA	NA	6	26021911	26021911	C	G							192
Ovarian Serous Cystadenocarcinoma (TCGA, PanCancer Atlas)	TCGA-24-2280-01	Serous Ovarian Cancer	S2F	OncoKB: NA;CIViC: NA;MyCancerGenome: not present;CancerHotspot: no;3DHotspot: no	MutationAssessor: Error;SIFT: impact: undefined, score: undefined;Polyphen-2: impact: undefined, score: undefined	Missense_Mutation			.	.	.	6	26021911	26021911	C	T			9	166		94	191
Kidney Renal Papillary Cell Carcinoma (TCGA, PanCancer Atlas)	TCGA-G7-6793-01	Papillary Renal Cell Carcinoma	G5C	OncoKB: NA;CIViC: NA;MyCancerGenome: not present;CancerHotspot: no;3DHotspot: no	MutationAssessor: Error;SIFT: impact: undefined, score: undefined;Polyphen-2: impact: undefined, score: undefined	Missense_Mutation			.	.	.	6	26021919	26021919	G	T			3	25		58	197
Pan-Lung Cancer (TCGA, Nat Genet 2016)	TCGA-56-7222-01	Lung Squamous Cell Carcinoma	K6M	OncoKB: NA;CIViC: NA;MyCancerGenome: not present;CancerHotspot: no;3DHotspot: no	MutationAssessor: Error;SIFT: impact: undefined, score: undefined;Polyphen-2: impact: undefined, score: undefined	Missense_Mutation			Somatic	NA	broad.mit.edu	6	26021923	26021923	A	T			16	31		58	352
Testicular Germ Cell Cancer (TCGA, Provisional)	TCGA-2G-AAFI-01	Embryonal Carcinoma	G12S	OncoKB: NA;CIViC: NA;MyCancerGenome: not present;CancerHotspot: no;3DHotspot: no	MutationAssessor: Error;SIFT: impact: undefined, score: undefined;Polyphen-2: impact: undefined, score: undefined	Missense_Mutation			Somatic	Untested	hgsc.bcm.edu;broad.mit.edu;ucsc.edu;bcgsc.ca;mdanderson.org	6	26021940	26021940	G	A							48
Uterine Corpus Endometrial Carcinoma (TCGA, PanCancer Atlas)	TCGA-DF-A2KU-01	Uterine Endometrioid Carcinoma	G15D	OncoKB: NA;CIViC: NA;MyCancerGenome: not present;CancerHotspot: no;3DHotspot: no	MutationAssessor: Error;SIFT: impact: undefined, score: undefined;Polyphen-2: impact: undefined, score: undefined	Missense_Mutation			.	.	.	6	26021950	26021950	G	A			22	62		38	10061
Stomach Adenocarcinoma (TCGA, PanCancer Atlas)	TCGA-VQ-A91D-01	Intestinal Type Stomach Adenocarcinoma	G15S	OncoKB: NA;CIViC: NA;MyCancerGenome: not present;CancerHotspot: no;3DHotspot: no	MutationAssessor: Error;SIFT: impact: undefined, score: undefined;Polyphen-2: impact: undefined, score: undefined	Missense_Mutation			.	.	.	6	26021949	26021949	G	A			11	34		61	2140
Prostate Adenocarcinoma (TCGA, Cell 2015)	TCGA-G9-6342-01	Prostate Adenocarcinoma	Q28H	OncoKB: NA;CIViC: NA;MyCancerGenome: not present;CancerHotspot: no;3DHotspot: no	MutationAssessor: Error;SIFT: impact: undefined, score: undefined;Polyphen-2: impact: undefined, score: undefined	Missense_Mutation		1	Somatic	NA	broad.mit.edu	6	26021990	26021990	G	T				57			164
Prostate Adenocarcinoma (TCGA, Provisional)	TCGA-XK-AAIW-01	Prostate Adenocarcinoma	G29D	OncoKB: NA;CIViC: NA;MyCancerGenome: not present;CancerHotspot: no;3DHotspot: no	MutationAssessor: Error;SIFT: impact: undefined, score: undefined;Polyphen-2: impact: undefined, score: undefined	Missense_Mutation			Somatic	NA	broad.mit.edu	6	26021992	26021992	G	A			20	22			6525
Colon Adenocarcinoma (TCGA, PanCancer Atlas)	TCGA-CK-4951-01	Mucinous Adenocarcinoma of the Colon and Rectum	I30N	OncoKB: NA;CIViC: NA;MyCancerGenome: not present;CancerHotspot: no;3DHotspot: no	MutationAssessor: Error;SIFT: impact: undefined, score: undefined;Polyphen-2: impact: undefined, score: undefined	Missense_Mutation			.	.	.	6	26021995	26021995	T	A			17	39		104	4195
Colon Adenocarcinoma (TCGA, PanCancer Atlas)	TCGA-AM-5821-01	Colon Adenocarcinoma	I30S	OncoKB: NA;CIViC: NA;MyCancerGenome: not present;CancerHotspot: no;3DHotspot: no	MutationAssessor: Error;SIFT: impact: undefined, score: undefined;Polyphen-2: impact: undefined, score: undefined	Missense_Mutation			.	.	.	6	26021995	26021995	T	G			28	122		206	1205
Colorectal Adenocarcinoma (DFCI, Cell Reports 2016)	coadread_dfci_2016_3321	Colorectal Adenocarcinoma	A34V	OncoKB: NA;CIViC: NA;MyCancerGenome: not present;CancerHotspot: no;3DHotspot: no	MutationAssessor: Error;SIFT: impact: undefined, score: undefined;Polyphen-2: impact: undefined, score: undefined	Missense_Mutation			NA	NA	dfci.harvard.edu	6	26022007	26022007	C	T							1120
Uterine Corpus Endometrial Carcinoma (TCGA, PanCancer Atlas)	TCGA-EO-A3KX-01	Uterine Endometrioid Carcinoma	G43D	OncoKB: NA;CIViC: NA;MyCancerGenome: not present;CancerHotspot: no;3DHotspot: no	MutationAssessor: Error;SIFT: impact: undefined, score: undefined;Polyphen-2: impact: undefined, score: undefined	Missense_Mutation			.	.	.	6	26022034	26022034	G	A			35	72		47	3206
Colorectal Adenocarcinoma (DFCI, Cell Reports 2016)	coadread_dfci_2016_390	Colorectal Adenocarcinoma	I47V	OncoKB: NA;CIViC: NA;MyCancerGenome: not present;CancerHotspot: no;3DHotspot: no	MutationAssessor: Error;SIFT: impact: undefined, score: undefined;Polyphen-2: impact: undefined, score: undefined	Missense_Mutation			NA	NA	dfci.harvard.edu	6	26022045	26022045	A	G							778
Head and Neck Squamous Cell Carcinoma (TCGA, Provisional)	TCGA-QK-A6VB-01	Head and Neck Squamous Cell Carcinoma	S48P	OncoKB: NA;CIViC: NA;MyCancerGenome: not present;CancerHotspot: no;3DHotspot: no	MutationAssessor: Error;SIFT: impact: undefined, score: undefined;Polyphen-2: impact: undefined, score: undefined	Missense_Mutation			Somatic	NA	broad.mit.edu	6	26022048	26022048	T	C			36	83			462
Colorectal Adenocarcinoma (TCGA, Nature 2012)	TCGA-AG-A002-01	Rectal Adenocarcinoma	V61A	OncoKB: NA;CIViC: NA;MyCancerGenome: not present;CancerHotspot: no;3DHotspot: no	MutationAssessor: Error;SIFT: impact: undefined, score: undefined;Polyphen-2: impact: undefined, score: undefined	Missense_Mutation		1	Somatic	Valid	broad.mit.edu;hgsc.bcm.edu	6	26022088	26022088	T	C							9943
Esophageal Squamous Cell Carcinoma (UCLA, Nat Genet 2014)	ESCC-D14	Esophageal Squamous Cell Carcinoma	D69H	OncoKB: NA;CIViC: NA;MyCancerGenome: not present;CancerHotspot: no;3DHotspot: no	MutationAssessor: Error;SIFT: impact: undefined, score: undefined;Polyphen-2: impact: undefined, score: undefined	Missense_Mutation			NA	NA	ucla.edu	6	26022111	26022111	G	C							74
TCGA data for Esophagus-Stomach Cancers (TCGA, Nature 2017)	TCGA-BR-6452-01	Stomach Adenocarcinoma	A70V	OncoKB: NA;CIViC: NA;MyCancerGenome: not present;CancerHotspot: no;3DHotspot: no	MutationAssessor: Error;SIFT: impact: undefined, score: undefined;Polyphen-2: impact: undefined, score: undefined	Missense_Mutation		1	Somatic	Untested	genome.wustl.edu	6	26022115	26022115	C	T			4	62		63	6541
TCGA data for Esophagus-Stomach Cancers (TCGA, Nature 2017)	TCGA-CG-4442-01	Stomach Adenocarcinoma	Y73H	OncoKB: NA;CIViC: NA;MyCancerGenome: not present;CancerHotspot: no;3DHotspot: no	MutationAssessor: Error;SIFT: impact: undefined, score: undefined;Polyphen-2: impact: undefined, score: undefined	Missense_Mutation		1	Somatic	Untested	genome.wustl.edu	6	26022123	26022123	T	C			60	69		81	1405
Bladder Cancer (TCGA, Cell 2017)	TCGA-DK-A6B5-01	Bladder Urothelial Carcinoma	Y73H	OncoKB: NA;CIViC: NA;MyCancerGenome: not present;CancerHotspot: no;3DHotspot: no	MutationAssessor: Error;SIFT: impact: undefined, score: undefined;Polyphen-2: impact: undefined, score: undefined	Missense_Mutation		1	Somatic	NaN	broad.mit.edu	6	26022123	26022123	T	C				51			119
Uterine Corpus Endometrial Carcinoma (TCGA, PanCancer Atlas)	TCGA-FI-A2D5-01	Uterine Endometrioid Carcinoma	A90T	OncoKB: NA;CIViC: NA;MyCancerGenome: not present;CancerHotspot: no;3DHotspot: no	MutationAssessor: Error;SIFT: impact: undefined, score: undefined;Polyphen-2: impact: undefined, score: undefined	Missense_Mutation			.	.	.	6	26022174	26022174	G	A			34	52		103	13876
Rectum Adenocarcinoma (TCGA, PanCancer Atlas)	TCGA-AG-3731-01	Rectal Adenocarcinoma	L91F	OncoKB: NA;CIViC: NA;MyCancerGenome: not present;CancerHotspot: no;3DHotspot: no	MutationAssessor: Error;SIFT: impact: undefined, score: undefined;Polyphen-2: impact: undefined, score: undefined	Missense_Mutation		1	.	.	.	6	26022177	26022177	C	T			33	132		175	135
Prostate Adenocarcinoma (TCGA, Cell 2015)	TCGA-VP-A87D-01	Prostate Adenocarcinoma	R93L	OncoKB: NA;CIViC: NA;MyCancerGenome: not present;CancerHotspot: no;3DHotspot: no	MutationAssessor: Error;SIFT: impact: undefined, score: undefined;Polyphen-2: impact: undefined, score: undefined	Missense_Mutation			Somatic	NA	broad.mit.edu	6	26022184	26022184	G	T				71			28
Hepatocellular Carcinomas (Inserm, Nat Genet 2015)	CHC1185T	Hepatocellular Carcinoma	G103D	OncoKB: NA;CIViC: NA;MyCancerGenome: not present;CancerHotspot: no;3DHotspot: no	MutationAssessor: Error;SIFT: impact: undefined, score: undefined;Polyphen-2: impact: undefined, score: undefined	Missense_Mutation			NA	NA	inserm.fr	6	26022214	26022214	G	A							78
Metastatic Prostate Adenocarcinoma (SU2C/PCF Dream Team, PNAS 2019)	PROS12319B-SU2C-06115119-Tumor-SM-4W2NE	Prostate Adenocarcinoma	R56S	OncoKB: NA;CIViC: NA;MyCancerGenome: not present;CancerHotspot: no;3DHotspot: no	MutationAssessor: Error;SIFT: impact: undefined, score: undefined;Polyphen-2: impact: undefined, score: undefined	Missense_Mutation	diploid		Somatic	Untested	broad.mit.edu	6	26022072	26022072	C	A	0.03		9	302			125	2019-01-01	ENST00000359907.3:c.166C>A

## Sheet: HIST1H4B
Study	Sample ID	Cancer Type	Protein Change	Annotation	Functional Impact	Mutation Type	Copy #	COSMIC	MS	VS	Center	Chromosome	Start Pos	End Pos	Ref	Var	Allele Freq (T)	Allele Freq (N)	Variant Reads	Ref Reads	Variant Reads (N)	Ref Reads (N)	# Mut in Sample
Cervical Squamous Cell Carcinoma and Endocervical Adenocarcinoma (TCGA, Provisional)	TCGA-IR-A3LK-01	Cervical Squamous Cell Carcinoma	S2F	OncoKB: NA;CIViC: NA;MyCancerGenome: not present;CancerHotspot: no;3DHotspot: no	MutationAssessor: Error;SIFT: impact: undefined, score: undefined;Polyphen-2: impact: undefined, score: undefined	Missense_Mutation			Somatic	Untested	genome.wustl.edu	6	26027476	26027476	G	A				3		27	1152
Clear Cell Renal Cell Carcinoma (U Tokyo, Nat Genet 2013)	ccRCC_49	Renal Clear Cell Carcinoma with Sarcomatoid Features	R4C	OncoKB: NA;CIViC: NA;MyCancerGenome: not present;CancerHotspot: no;3DHotspot: no	MutationAssessor: Error;SIFT: impact: undefined, score: undefined;Polyphen-2: impact: undefined, score: undefined	Missense_Mutation		2	NA	NA	UTokyo	6	26027471	26027471	G	A							73
Kidney Renal Papillary Cell Carcinoma (TCGA, Provisional)	TCGA-B3-8121-01	Papillary Renal Cell Carcinoma	R4G	OncoKB: NA;CIViC: NA;MyCancerGenome: not present;CancerHotspot: no;3DHotspot: no	MutationAssessor: Error;SIFT: impact: undefined, score: undefined;Polyphen-2: impact: undefined, score: undefined	Missense_Mutation		2	Somatic	Untested	hgsc.bcm.edu	6	26027471	26027471	G	C			16	88		95	23
Skin Cutaneous Melanoma (TCGA, PanCancer Atlas)	TCGA-Z2-AA3S-06	Cutaneous Melanoma	G5D	OncoKB: NA;CIViC: NA;MyCancerGenome: not present;CancerHotspot: no;3DHotspot: no	MutationAssessor: Error;SIFT: impact: undefined, score: undefined;Polyphen-2: impact: undefined, score: undefined	Missense_Mutation			.	.	.	6	26027467	26027467	C	T			4	49		69	171
Neuroendocrine Prostate Cancer (Trento/Cornell/Broad 2016)	WCMC24290_1_N	Prostate Neuroendocrine Carcinoma	G5V	OncoKB: NA;CIViC: NA;MyCancerGenome: not present;CancerHotspot: no;3DHotspot: no	MutationAssessor: Error;SIFT: impact: undefined, score: undefined;Polyphen-2: impact: undefined, score: undefined	Missense_Mutation			NA	NA	Weill Cornell Medical College	6	26027467	26027467	C	A				109			75
Adrenocortical Carcinoma (TCGA, Provisional)	TCGA-OR-A5JY-01	Adrenocortical Carcinoma	G12R	OncoKB: NA;CIViC: NA;MyCancerGenome: not present;CancerHotspot: no;3DHotspot: no	MutationAssessor: Error;SIFT: impact: undefined, score: undefined;Polyphen-2: impact: undefined, score: undefined	Missense_Mutation			Somatic	Untested	hgsc.bcm.edu;broad.mit.edu;ucsc.edu;bcgsc.ca;mdanderson.org	6	26027447	26027447	C	G			50	67		154	118
Lung Adenocarcinoma (MSKCC 2015)	MA7027	Lung Adenocarcinoma	K13R	OncoKB: NA;CIViC: NA;MyCancerGenome: not present;CancerHotspot: no;3DHotspot: no	MutationAssessor: Error;SIFT: impact: undefined, score: undefined;Polyphen-2: impact: undefined, score: undefined	Missense_Mutation			NA	NA	NA	6	26027443	26027443	T	C			65	192		82	281
Ampullary Carcinoma (Baylor College of Medicine, Cell Reports 2016)	AMPAC_705	Ampullary Carcinoma	G14E	OncoKB: NA;CIViC: NA;MyCancerGenome: not present;CancerHotspot: no;3DHotspot: no	MutationAssessor: Error;SIFT: impact: undefined, score: undefined;Polyphen-2: impact: undefined, score: undefined	Missense_Mutation			Somatic	Untested	Baylor College of Medicine	6	26027440	26027440	C	T			41	114		128	37
Colorectal Adenocarcinoma (DFCI, Cell Reports 2016)	coadread_dfci_2016_3104	Colorectal Adenocarcinoma	K17R	OncoKB: NA;CIViC: NA;MyCancerGenome: not present;CancerHotspot: no;3DHotspot: no	MutationAssessor: Error;SIFT: impact: undefined, score: undefined;Polyphen-2: impact: undefined, score: undefined	Missense_Mutation			NA	NA	dfci.harvard.edu	6	26027431	26027431	T	C							106
The Metastatic Breast Cancer Project (Provisional, April 2018)	MBC-MBCProject_7wCjtKIW-Tumor-SM-GQCN4	Breast Invasive Lobular Carcinoma	R20P	OncoKB: NA;CIViC: NA;MyCancerGenome: not present;CancerHotspot: no;3DHotspot: no	MutationAssessor: Error;SIFT: impact: undefined, score: undefined;Polyphen-2: impact: undefined, score: undefined	Missense_Mutation			Somatic	---	broad.mit.edu	6	26027422	26027422	C	G							1202
Head and Neck Squamous Cell Carcinoma (TCGA, Nature 2015)	TCGA-CV-7263-01	Head and Neck Squamous Cell Carcinoma	V22M	OncoKB: NA;CIViC: NA;MyCancerGenome: not present;CancerHotspot: no;3DHotspot: no	MutationAssessor: Error;SIFT: impact: undefined, score: undefined;Polyphen-2: impact: undefined, score: undefined	Missense_Mutation			Unknown	NA	broad.mit.edu	6	26027417	26027417	C	T				64			102
Small Cell Lung Cancer (CLCGP, Nat Genet 2012)	S00943	Small Cell Lung Cancer	D25V	OncoKB: NA;CIViC: NA;MyCancerGenome: not present;CancerHotspot: no;3DHotspot: no	MutationAssessor: Error;SIFT: impact: undefined, score: undefined;Polyphen-2: impact: undefined, score: undefined	Missense_Mutation		1	NA	Unknown	CLCGP	6	26027407	26027407	T	A							240
Chronic Lymphocytic Leukemia (IUOPA, Nature 2015)	cll_iuopa_2015_1164	Chronic Lymphocytic Leukemia	N26K	OncoKB: NA;CIViC: NA;MyCancerGenome: not present;CancerHotspot: no;3DHotspot: no	MutationAssessor: Error;SIFT: impact: undefined, score: undefined;Polyphen-2: impact: undefined, score: undefined	Missense_Mutation		2	NA	NA	www.unioviedo.es/IUOPA/	6	26027403	26027403	G	C							14
Pan-Lung Cancer (TCGA, Nat Genet 2016)	TCGA-66-2765-01	Lung Squamous Cell Carcinoma	Q28E	OncoKB: NA;CIViC: NA;MyCancerGenome: not present;CancerHotspot: no;3DHotspot: no	MutationAssessor: Error;SIFT: impact: undefined, score: undefined;Polyphen-2: impact: undefined, score: undefined	Missense_Mutation		2	Somatic	NA	broad.mit.edu	6	26027399	26027399	G	C			15	112		107	92
Skin Cutaneous Melanoma (TCGA, PanCancer Atlas)	TCGA-ER-A19S-06	Cutaneous Melanoma	Q28K	OncoKB: NA;CIViC: NA;MyCancerGenome: not present;CancerHotspot: no;3DHotspot: no	MutationAssessor: Error;SIFT: impact: undefined, score: undefined;Polyphen-2: impact: undefined, score: undefined	Missense_Mutation		2	.	.	.	6	26027399	26027399	G	T			9	62		58	197
Uterine Corpus Endometrial Carcinoma (TCGA, PanCancer Atlas)	TCGA-B5-A3FC-01	Uterine Endometrioid Carcinoma	P33L	OncoKB: NA;CIViC: NA;MyCancerGenome: not present;CancerHotspot: no;3DHotspot: no	MutationAssessor: Error;SIFT: impact: undefined, score: undefined;Polyphen-2: impact: undefined, score: undefined	Missense_Mutation			.	.	.	6	26027383	26027383	G	A			18	20		51	12218
Lung Squamous Cell Carcinoma (TCGA, Nature 2012)	TCGA-66-2789-01	Lung Squamous Cell Carcinoma	R36L	OncoKB: NA;CIViC: NA;MyCancerGenome: not present;CancerHotspot: no;3DHotspot: no	MutationAssessor: Error;SIFT: impact: undefined, score: undefined;Polyphen-2: impact: undefined, score: undefined	Missense_Mutation			NA	---	broad.mit.edu	6	26027374	26027374	C	A				41			338
Prostate Adenocarcinoma (TCGA, Provisional)	TCGA-KK-A7B4-01	Prostate Adenocarcinoma	R36W	OncoKB: NA;CIViC: NA;MyCancerGenome: not present;CancerHotspot: no;3DHotspot: no	MutationAssessor: Error;SIFT: impact: undefined, score: undefined;Polyphen-2: impact: undefined, score: undefined	Missense_Mutation			Somatic	NA	broad.mit.edu	6	26027375	26027375	G	A			4	56			26
Primary Central Nervous System Lymphoma (Mayo Clinic, Clin Cancer Res 2015)	PCNSL_3	Primary CNS Lymphoma	R37H	OncoKB: NA;CIViC: NA;MyCancerGenome: not present;CancerHotspot: no;3DHotspot: no	MutationAssessor: Error;SIFT: impact: undefined, score: undefined;Polyphen-2: impact: undefined, score: undefined	Missense_Mutation		1	NA	NA	Mayo Clinic	6	26027371	26027371	C	T							289
Pan-Lung Cancer (TCGA, Nat Genet 2016)	LUAD-S01413-Tumor	Lung Adenocarcinoma	R37L	OncoKB: NA;CIViC: NA;MyCancerGenome: not present;CancerHotspot: no;3DHotspot: no	MutationAssessor: Error;SIFT: impact: undefined, score: undefined;Polyphen-2: impact: undefined, score: undefined	Missense_Mutation		1	Somatic	NA	broad.mit.edu	6	26027371	26027371	C	A			39	47		68	348
Cutaneous Squamous Cell Carcinoma (MD Anderson, Clin Cancer Res 2014)	CSCC-7-T	Cutaneous Squamous Cell Carcinoma	L38F	OncoKB: NA;CIViC: NA;MyCancerGenome: not present;CancerHotspot: no;3DHotspot: no	MutationAssessor: Error;SIFT: impact: undefined, score: undefined;Polyphen-2: impact: undefined, score: undefined	Missense_Mutation			Somatic	Untested	hgsc.bcm.edu	6	26027369	26027369	G	A			18	107		112	3121
Cutaneous Squamous Cell Carcinoma (MD Anderson, Clin Cancer Res 2014)	CSCC-11-T	Cutaneous Squamous Cell Carcinoma	L38F	OncoKB: NA;CIViC: NA;MyCancerGenome: not present;CancerHotspot: no;3DHotspot: no	MutationAssessor: Error;SIFT: impact: undefined, score: undefined;Polyphen-2: impact: undefined, score: undefined	Missense_Mutation			Somatic	Untested	hgsc.bcm.edu	6	26027369	26027369	G	A			21	108		118	3136
Prostate Adenocarcinoma (TCGA, Provisional)	TCGA-HC-7745-01	Prostate Adenocarcinoma	R41H	OncoKB: NA;CIViC: NA;MyCancerGenome: not present;CancerHotspot: no;3DHotspot: no	MutationAssessor: Error;SIFT: impact: undefined, score: undefined;Polyphen-2: impact: undefined, score: undefined	Missense_Mutation			Somatic	NA	broad.mit.edu	6	26027359	26027359	C	T			4	62			50
Uterine Corpus Endometrial Carcinoma (TCGA, PanCancer Atlas)	TCGA-AX-A1CF-01	Uterine Endometrioid Carcinoma	R46L	OncoKB: NA;CIViC: NA;MyCancerGenome: not present;CancerHotspot: no;3DHotspot: no	MutationAssessor: Error;SIFT: impact: undefined, score: undefined;Polyphen-2: impact: undefined, score: undefined	Missense_Mutation		2	.	.	.	6	26027344	26027344	C	A			11	62		63	92
Colon Adenocarcinoma (TCGA, PanCancer Atlas)	TCGA-5M-AAT4-01	Colon Adenocarcinoma	R46P	OncoKB: NA;CIViC: NA;MyCancerGenome: not present;CancerHotspot: no;3DHotspot: no	MutationAssessor: Error;SIFT: impact: undefined, score: undefined;Polyphen-2: impact: undefined, score: undefined	Missense_Mutation		2	.	.	.	6	26027344	26027344	C	G			8	89		104	176
Pan-Lung Cancer (TCGA, Nat Genet 2016)	TCGA-77-6842-01	Lung Squamous Cell Carcinoma	R46Q	OncoKB: NA;CIViC: NA;MyCancerGenome: not present;CancerHotspot: no;3DHotspot: no	MutationAssessor: Error;SIFT: impact: undefined, score: undefined;Polyphen-2: impact: undefined, score: undefined	Missense_Mutation		2	Somatic	NA	broad.mit.edu	6	26027344	26027344	C	T			28	44		55	331
Esophageal Adenocarcinoma (Broad, Nat Genet 2013)	ESO-118	Esophageal Adenocarcinoma	R46Q	OncoKB: NA;CIViC: NA;MyCancerGenome: not present;CancerHotspot: no;3DHotspot: no	MutationAssessor: Error;SIFT: impact: undefined, score: undefined;Polyphen-2: impact: undefined, score: undefined	Missense_Mutation		2	Somatic	NA	broad.mit.edu	6	26027344	26027344	C	T				55			142
Nasopharyngeal Carcinoma (Singapore, Nat Genet 2014)	NPC6F	Nasopharyngeal Carcinoma	R46Q	OncoKB: NA;CIViC: NA;MyCancerGenome: not present;CancerHotspot: no;3DHotspot: no	MutationAssessor: Error;SIFT: impact: undefined, score: undefined;Polyphen-2: impact: undefined, score: undefined	Missense_Mutation		2	NA	NA	NA	6	26027344	26027344	C	T							70
TCGA data for Esophagus-Stomach Cancers (TCGA, Nature 2017)	TCGA-2H-A9GK-01	Esophageal Adenocarcinoma	R46Q	OncoKB: NA;CIViC: NA;MyCancerGenome: not present;CancerHotspot: no;3DHotspot: no	MutationAssessor: Error;SIFT: impact: undefined, score: undefined;Polyphen-2: impact: undefined, score: undefined	Missense_Mutation		2	Somatic	Untested	genome.wustl.edu	6	26027344	26027344	C	T			5	35		26	321
Colorectal Adenocarcinoma (TCGA, Nature 2012)	TCGA-A6-2676-01	Colorectal Adenocarcinoma	R46Q	OncoKB: NA;CIViC: NA;MyCancerGenome: not present;CancerHotspot: no;3DHotspot: no	MutationAssessor: Error;SIFT: impact: undefined, score: undefined;Polyphen-2: impact: undefined, score: undefined	Missense_Mutation		2	Somatic	Valid	hgsc.bcm.edu	6	26027344	26027344	C	T							598
Head and Neck Squamous Cell Carcinoma (TCGA, Provisional)	TCGA-IQ-A61H-01	Head and Neck Squamous Cell Carcinoma	R46Q	OncoKB: NA;CIViC: NA;MyCancerGenome: not present;CancerHotspot: no;3DHotspot: no	MutationAssessor: Error;SIFT: impact: undefined, score: undefined;Polyphen-2: impact: undefined, score: undefined	Missense_Mutation		2	Somatic	NA	broad.mit.edu	6	26027344	26027344	C	T			12	85			135
Primary Central Nervous System Lymphoma (Mayo Clinic, Clin Cancer Res 2015)	PCNSL_29	Primary CNS Lymphoma	G49D	OncoKB: NA;CIViC: NA;MyCancerGenome: not present;CancerHotspot: no;3DHotspot: no	MutationAssessor: Error;SIFT: impact: undefined, score: undefined;Polyphen-2: impact: undefined, score: undefined	Missense_Mutation			NA	NA	Mayo Clinic	6	26027335	26027335	C	T							179
Multiple Myeloma (Broad, Cancer Cell 2014)	MM-0597	Multiple Myeloma	L50F	OncoKB: NA;CIViC: NA;MyCancerGenome: not present;CancerHotspot: no;3DHotspot: no	MutationAssessor: Error;SIFT: impact: undefined, score: undefined;Polyphen-2: impact: undefined, score: undefined	Missense_Mutation		1	NA	NA	broad.mit.edu	6	26027331	26027331	C	G							40
Papillary Thyroid Carcinoma (TCGA, Cell 2014)	TCGA-EM-A1CU-01	Papillary Thyroid Cancer	L50F	OncoKB: NA;CIViC: NA;MyCancerGenome: not present;CancerHotspot: no;3DHotspot: no	MutationAssessor: Error;SIFT: impact: undefined, score: undefined;Polyphen-2: impact: undefined, score: undefined	Missense_Mutation		1	Somatic	NA	broad.mit.edu	6	26027331	26027331	C	G				46			16
Adrenocortical Carcinoma (TCGA, Provisional)	TCGA-OR-A5K6-01	Adrenocortical Carcinoma	L50F	OncoKB: NA;CIViC: NA;MyCancerGenome: not present;CancerHotspot: no;3DHotspot: no	MutationAssessor: Error;SIFT: impact: undefined, score: undefined;Polyphen-2: impact: undefined, score: undefined	Missense_Mutation		1	Somatic	Untested	broad.mit.edu;ucsc.edu;bcgsc.ca	6	26027331	26027331	C	G			21	196	1	186	96
Breast Invasive Carcinoma (TCGA, Cell 2015)	TCGA-AR-A2LE-01	Breast Invasive Lobular Carcinoma	E53Q	OncoKB: NA;CIViC: NA;MyCancerGenome: not present;CancerHotspot: no;3DHotspot: no	MutationAssessor: Error;SIFT: impact: undefined, score: undefined;Polyphen-2: impact: undefined, score: undefined	Missense_Mutation		1	NA	NA	genome.wustl.edu;unc.edu	6	26027324	26027324	C	G			25	49		38	242
Pan-Lung Cancer (TCGA, Nat Genet 2016)	TCGA-49-6767-01	Lung Adenocarcinoma	E54D	OncoKB: NA;CIViC: NA;MyCancerGenome: not present;CancerHotspot: no;3DHotspot: no	MutationAssessor: Error;SIFT: impact: undefined, score: undefined;Polyphen-2: impact: undefined, score: undefined	Missense_Mutation		1	Somatic	NA	broad.mit.edu	6	26027319	26027319	C	G			3	78		60	403
Mutational profiles of metastatic breast cancer (France, 2016)	MBC_53	Invasive Breast Carcinoma	E54D	OncoKB: NA;CIViC: NA;MyCancerGenome: not present;CancerHotspot: no;3DHotspot: no	MutationAssessor: Error;SIFT: impact: undefined, score: undefined;Polyphen-2: impact: undefined, score: undefined	Missense_Mutation		1	Somatic	NA	GR	6	26027319	26027319	C	G			58	217		159	109
Head and Neck Squamous Cell Carcinoma (TCGA, Provisional)	TCGA-CV-A45W-01	Head and Neck Squamous Cell Carcinoma	T55I	OncoKB: NA;CIViC: NA;MyCancerGenome: not present;CancerHotspot: no;3DHotspot: no	MutationAssessor: Error;SIFT: impact: undefined, score: undefined;Polyphen-2: impact: undefined, score: undefined	Missense_Mutation			Somatic	NA	broad.mit.edu	6	26027317	26027317	G	A			14	62			565
Cervical Squamous Cell Carcinoma (TCGA, PanCancer Atlas)	TCGA-C5-A7X5-01	Cervical Squamous Cell Carcinoma	R56G	OncoKB: NA;CIViC: NA;MyCancerGenome: not present;CancerHotspot: no;3DHotspot: no	MutationAssessor: Error;SIFT: impact: undefined, score: undefined;Polyphen-2: impact: undefined, score: undefined	Missense_Mutation			.	.	.	6	26027315	26027315	G	C			17	45		64	195
Pan-Lung Cancer (TCGA, Nat Genet 2016)	TCGA-60-2698-01	Lung Squamous Cell Carcinoma	L59F	OncoKB: NA;CIViC: NA;MyCancerGenome: not present;CancerHotspot: no;3DHotspot: no	MutationAssessor: Error;SIFT: impact: undefined, score: undefined;Polyphen-2: impact: undefined, score: undefined	Missense_Mutation		2	Somatic	NA	broad.mit.edu	6	26027306	26027306	G	A			24	89		101	1051
Testicular Germ Cell Cancer (TCGA, Provisional)	TCGA-2G-AAG7-01	Non-Seminomatous Germ Cell Tumor	K60E	OncoKB: NA;CIViC: NA;MyCancerGenome: not present;CancerHotspot: no;3DHotspot: no	MutationAssessor: Error;SIFT: impact: undefined, score: undefined;Polyphen-2: impact: undefined, score: undefined	Missense_Mutation			Somatic	Untested	hgsc.bcm.edu;broad.mit.edu;ucsc.edu;bcgsc.ca;mdanderson.org	6	26027303	26027303	T	C							61
Cutaneous Squamous Cell Carcinoma (MD Anderson, Clin Cancer Res 2014)	CSCC-41-T	Cutaneous Squamous Cell Carcinoma	V61M	OncoKB: NA;CIViC: NA;MyCancerGenome: not present;CancerHotspot: no;3DHotspot: no	MutationAssessor: Error;SIFT: impact: undefined, score: undefined;Polyphen-2: impact: undefined, score: undefined	Missense_Mutation		1	Somatic	Untested	hgsc.bcm.edu	6	26027300	26027300	C	T			29	88		110	2266
Colon Adenocarcinoma (TCGA, PanCancer Atlas)	TCGA-AZ-6599-01	Colon Adenocarcinoma	V61M	OncoKB: NA;CIViC: NA;MyCancerGenome: not present;CancerHotspot: no;3DHotspot: no	MutationAssessor: Error;SIFT: impact: undefined, score: undefined;Polyphen-2: impact: undefined, score: undefined	Missense_Mutation		1	.	.	.	6	26027300	26027300	C	T			49	85		132	229
Head and Neck Squamous Cell Carcinoma (Broad, Science 2011)	HN_63021	Head and Neck Squamous Cell Carcinoma	R68W	OncoKB: NA;CIViC: NA;MyCancerGenome: not present;CancerHotspot: no;3DHotspot: no	MutationAssessor: Error;SIFT: impact: undefined, score: undefined;Polyphen-2: impact: undefined, score: undefined	Missense_Mutation		2	Unknown	Unknown	broad.mit.edu	6	26027279	26027279	G	A			43	62			201
Pan-Lung Cancer (TCGA, Nat Genet 2016)	TCGA-56-6545-01	Lung Squamous Cell Carcinoma	A70S	OncoKB: NA;CIViC: NA;MyCancerGenome: not present;CancerHotspot: no;3DHotspot: no	MutationAssessor: Error;SIFT: impact: undefined, score: undefined;Polyphen-2: impact: undefined, score: undefined	Missense_Mutation		2	Somatic	NA	broad.mit.edu	6	26027273	26027273	C	A			9	63		66	257
Brain Lower Grade Glioma (TCGA, Provisional)	TCGA-DU-8164-01	Oligodendroglioma	A70T	OncoKB: NA;CIViC: NA;MyCancerGenome: not present;CancerHotspot: no;3DHotspot: no	MutationAssessor: Error;SIFT: impact: undefined, score: undefined;Polyphen-2: impact: undefined, score: undefined	Missense_Mutation		2	Somatic	Untested	hgsc.bcm.edu;broad.mit.edu	6	26027273	26027273	C	T			4	64			27
Prostate Adenocarcinoma (TCGA, Provisional)	TCGA-HC-7750-01	Prostate Adenocarcinoma	T72I	OncoKB: NA;CIViC: NA;MyCancerGenome: not present;CancerHotspot: no;3DHotspot: no	MutationAssessor: Error;SIFT: impact: undefined, score: undefined;Polyphen-2: impact: undefined, score: undefined	Missense_Mutation		1	Somatic	NA	broad.mit.edu	6	26027266	26027266	G	A			3	56			39
Colorectal Adenocarcinoma (DFCI, Cell Reports 2016)	coadread_dfci_2016_3658	Colorectal Adenocarcinoma	Y73C	OncoKB: NA;CIViC: NA;MyCancerGenome: not present;CancerHotspot: no;3DHotspot: no	MutationAssessor: Error;SIFT: impact: undefined, score: undefined;Polyphen-2: impact: undefined, score: undefined	Missense_Mutation			NA	NA	dfci.harvard.edu	6	26027263	26027263	T	C							1003
TCGA data for Esophagus-Stomach Cancers (TCGA, Nature 2017)	TCGA-BR-8487-01	Stomach Adenocarcinoma	H76R	OncoKB: NA;CIViC: NA;MyCancerGenome: not present;CancerHotspot: no;3DHotspot: no	MutationAssessor: Error;SIFT: impact: undefined, score: undefined;Polyphen-2: impact: undefined, score: undefined	Missense_Mutation		1	Somatic	Untested	genome.wustl.edu	6	26027254	26027254	T	C			39	57		89	2994
Pan-Lung Cancer (TCGA, Nat Genet 2016)	LUAD-RT-S01702-Tumor	Lung Adenocarcinoma	A77T	OncoKB: NA;CIViC: NA;MyCancerGenome: not present;CancerHotspot: no;3DHotspot: no	MutationAssessor: Error;SIFT: impact: undefined, score: undefined;Polyphen-2: impact: undefined, score: undefined	Missense_Mutation		1	Somatic	NA	broad.mit.edu	6	26027252	26027252	C	T			32	62		87	463
Lung Adenocarcinoma (TCGA, PanCancer Atlas)	TCGA-55-6969-01	Lung Adenocarcinoma	R79L	OncoKB: NA;CIViC: NA;MyCancerGenome: not present;CancerHotspot: no;3DHotspot: no	MutationAssessor: Error;SIFT: impact: undefined, score: undefined;Polyphen-2: impact: undefined, score: undefined	Missense_Mutation			.	.	.	6	26027245	26027245	C	A			20	76		152	427
Liver Hepatocellular Carcinoma (TCGA, Provisional)	TCGA-DD-A118-01	Hepatocellular Carcinoma	K80N	OncoKB: NA;CIViC: NA;MyCancerGenome: not present;CancerHotspot: no;3DHotspot: no	MutationAssessor: Error;SIFT: impact: undefined, score: undefined;Polyphen-2: impact: undefined, score: undefined	Missense_Mutation		1	Somatic	Untested	hgsc.bcm.edu	6	26027241	26027241	C	A			30	168	1	167	88
Prostate Adenocarcinoma (Fred Hutchinson CRC, Nat Med 2016)	00-010N_PROSTATE	Prostate Adenocarcinoma	T81A	OncoKB: NA;CIViC: NA;MyCancerGenome: not present;CancerHotspot: no;3DHotspot: no	MutationAssessor: Error;SIFT: impact: undefined, score: undefined;Polyphen-2: impact: undefined, score: undefined	Missense_Mutation			NA	NA	fhcrc	6	26027240	26027240	T	C				41			900
Uterine Corpus Endometrial Carcinoma (TCGA, PanCancer Atlas)	TCGA-AJ-A3EK-01	Uterine Endometrioid Carcinoma	T81I	OncoKB: NA;CIViC: NA;MyCancerGenome: not present;CancerHotspot: no;3DHotspot: no	MutationAssessor: Error;SIFT: impact: undefined, score: undefined;Polyphen-2: impact: undefined, score: undefined	Missense_Mutation			.	.	.	6	26027239	26027239	G	A			13	44		38	5737
Metastatic Prostate Cancer, SU2C/PCF Dream Team (Robinson et al., Cell 2015)	SC_9047	Prostate Adenocarcinoma	V82A	OncoKB: NA;CIViC: NA;MyCancerGenome: not present;CancerHotspot: no;3DHotspot: no	MutationAssessor: Error;SIFT: impact: undefined, score: undefined;Polyphen-2: impact: undefined, score: undefined	Missense_Mutation			NA	NA	NA	6	26027236	26027236	A	G				223			1005
Pan-Lung Cancer (TCGA, Nat Genet 2016)	TCGA-55-A4DG-01	Lung Adenocarcinoma	V82L	OncoKB: NA;CIViC: NA;MyCancerGenome: not present;CancerHotspot: no;3DHotspot: no	MutationAssessor: Error;SIFT: impact: undefined, score: undefined;Polyphen-2: impact: undefined, score: undefined	Missense_Mutation			Somatic	NA	broad.mit.edu	6	26027237	26027237	C	G			23	36		105	603
Stomach Adenocarcinoma (TCGA, PanCancer Atlas)	TCGA-VQ-AA6J-01	Intestinal Type Stomach Adenocarcinoma	D86N	OncoKB: NA;CIViC: NA;MyCancerGenome: not present;CancerHotspot: no;3DHotspot: no	MutationAssessor: Error;SIFT: impact: undefined, score: undefined;Polyphen-2: impact: undefined, score: undefined	Missense_Mutation		2	.	.	.	6	26027225	26027225	C	T			10	39		85	126
Acinar Cell Carcinoma of the Pancreas (Johns Hopkins, J Pathol 2014)	ACINAR11	Acinar Cell Carcinoma of the Pancreas	D86Y	OncoKB: NA;CIViC: NA;MyCancerGenome: not present;CancerHotspot: no;3DHotspot: no	MutationAssessor: Error;SIFT: impact: undefined, score: undefined;Polyphen-2: impact: undefined, score: undefined	Missense_Mutation		2	NA	NA	John_Hopkins	6	26027225	26027225	C	A							104
Desmoplastic Melanoma (Broad Institute, Nat Genet 2015)	35M	Desmoplastic Melanoma	K92R	OncoKB: NA;CIViC: NA;MyCancerGenome: not present;CancerHotspot: no;3DHotspot: no	MutationAssessor: Error;SIFT: impact: undefined, score: undefined;Polyphen-2: impact: undefined, score: undefined	Missense_Mutation			NA	NA	www.broadinstitute.org	6	26027206	26027206	T	C							1787
Prostate Adenocarcinoma (TCGA, Provisional)	TCGA-2A-AAYF-01	Prostate Adenocarcinoma	G103C	OncoKB: NA;CIViC: NA;MyCancerGenome: not present;CancerHotspot: no;3DHotspot: no	MutationAssessor: Error;SIFT: impact: undefined, score: undefined;Polyphen-2: impact: undefined, score: undefined	Missense_Mutation			Somatic	NA	broad.mit.edu	6	26027174	26027174	C	A			21	35			20
Diffuse Large B cell Lymphoma (DFCI, Nat Med 2018)	DLBCL-LS3271	Activated B-cell Type	A39V	OncoKB: NA;CIViC: NA;MyCancerGenome: not present;CancerHotspot: no;3DHotspot: no	MutationAssessor: Error;SIFT: impact: undefined, score: undefined;Polyphen-2: impact: undefined, score: undefined	Missense_Mutation			NA	NA	broad.mit.edu	6	26027365	26027365	G	A	0.07		5	69			156	2019-01-01	ENST00000377364.3:c.116C>T
MSS Mixed Solid Tumors (Broad/Dana-Farber, Nat Genet 2018)	Lung-DFCI-11-104-009-Tumor-SM-5YS7O	Lung Adenocarcinoma	R46P	OncoKB: NA;CIViC: NA;MyCancerGenome: not present;CancerHotspot: no;3DHotspot: no	MutationAssessor: Error;SIFT: impact: undefined, score: undefined;Polyphen-2: impact: undefined, score: undefined	Missense_Mutation		2	NA	NA	NA	6	26027344	26027344	C	G	0.74		175	61			1431	2019-01-01	ENST00000377364.3:c.137G>C
Metastatic Prostate Adenocarcinoma (SU2C/PCF Dream Team, PNAS 2019)	PRAD-01115245-Tumor-SM-6WZF3	Prostate Adenocarcinoma	D69N	OncoKB: NA;CIViC: NA;MyCancerGenome: not present;CancerHotspot: no;3DHotspot: no	MutationAssessor: Error;SIFT: impact: undefined, score: undefined;Polyphen-2: impact: undefined, score: undefined	Missense_Mutation	diploid		Unknown	NA	broad.mit.edu	6	26027276	26027276	C	T	0.09		15	160			55	2019-01-01	ENST00000377364.3:c.205G>A
Metastatic Prostate Adenocarcinoma (SU2C/PCF Dream Team, PNAS 2019)	SC_9197_T	Prostate Adenocarcinoma	Y89C	OncoKB: NA;CIViC: NA;MyCancerGenome: not present;CancerHotspot: no;3DHotspot: no	MutationAssessor: Error;SIFT: impact: undefined, score: undefined;Polyphen-2: impact: undefined, score: undefined	Missense_Mutation	diploid		Somatic	Untested	broad.mit.edu	6	26027215	26027215	T	C	0.29		93	227			924	2019-01-01	ENST00000377364.3:c.266A>G

## Sheet: HIST1H4C
Study	Sample ID	Cancer Type	Protein Change	Annotation	Functional Impact	Mutation Type	Copy #	COSMIC	MS	VS	Center	Chromosome	Start Pos	End Pos	Ref	Var	Allele Freq (T)	Allele Freq (N)	Variant Reads	Ref Reads	Variant Reads (N)	Ref Reads (N)	# Mut in Sample
Genomic Hallmarks of Prostate Adenocarcinoma (CPC-GENE, Nature 2017)	CPCG0124-F1	Prostate Adenocarcinoma	R4G	OncoKB: NA;CIViC: NA;MyCancerGenome: not present;CancerHotspot: no;3DHotspot: no	MutationAssessor: Error;SIFT: impact: undefined, score: undefined;Polyphen-2: impact: undefined, score: undefined	Missense_Mutation			Somatic	Unknown	CPCGene	6	26104185	26104185	C	G							12
Ovarian Serous Cystadenocarcinoma (TCGA, PanCancer Atlas)	TCGA-36-2532-01	Serous Ovarian Cancer	R4L	OncoKB: NA;CIViC: NA;MyCancerGenome: not present;CancerHotspot: no;3DHotspot: no	MutationAssessor: Error;SIFT: impact: undefined, score: undefined;Polyphen-2: impact: undefined, score: undefined	Missense_Mutation			.	.	.	6	26104186	26104186	G	T			6	125		113	48
Hepatocellular Carcinomas (Inserm, Nat Genet 2015)	CHC1700T	Hepatocellular Carcinoma	G8V	OncoKB: NA;CIViC: NA;MyCancerGenome: not present;CancerHotspot: no;3DHotspot: no	MutationAssessor: Error;SIFT: impact: undefined, score: undefined;Polyphen-2: impact: undefined, score: undefined	Missense_Mutation			NA	NA	inserm.fr	6	26104198	26104198	G	T							35
Head and Neck Squamous Cell Carcinoma (TCGA, Nature 2015)	TCGA-CR-5243-01	Head and Neck Squamous Cell Carcinoma	G10R	OncoKB: NA;CIViC: NA;MyCancerGenome: not present;CancerHotspot: no;3DHotspot: no	MutationAssessor: Error;SIFT: impact: undefined, score: undefined;Polyphen-2: impact: undefined, score: undefined	Missense_Mutation		1	Unknown	NA	broad.mit.edu	6	26104203	26104203	G	C				67			62
Cervical Squamous Cell Carcinoma (TCGA, PanCancer Atlas)	TCGA-C5-A1ME-01	Endocervical Adenocarcinoma	L11M	OncoKB: NA;CIViC: NA;MyCancerGenome: not present;CancerHotspot: no;3DHotspot: no	MutationAssessor: Error;SIFT: impact: undefined, score: undefined;Polyphen-2: impact: undefined, score: undefined	Missense_Mutation			.	.	.	6	26104206	26104206	T	A			7	62		93	64
Bladder Cancer (TCGA, Cell 2017)	TCGA-G2-AA3F-01	Bladder Urothelial Carcinoma	G14R	OncoKB: NA;CIViC: NA;MyCancerGenome: not present;CancerHotspot: no;3DHotspot: no	MutationAssessor: Error;SIFT: impact: undefined, score: undefined;Polyphen-2: impact: undefined, score: undefined	Missense_Mutation			Somatic	NaN	broad.mit.edu	6	26104215	26104215	G	C				43			130
Breast Invasive Carcinoma (Broad, Nature 2012)	BR-V-026	Breast Ductal Carcinoma In Situ	G14V	OncoKB: NA;CIViC: NA;MyCancerGenome: not present;CancerHotspot: no;3DHotspot: no	MutationAssessor: Error;SIFT: impact: undefined, score: undefined;Polyphen-2: impact: undefined, score: undefined	Missense_Mutation			Somatic	NA	broad.mit.edu	6	26104216	26104216	G	T							9
Skin Cutaneous Melanoma (TCGA, Provisional)	TCGA-FR-A3YO-06	Cutaneous Melanoma	H19Y	OncoKB: NA;CIViC: NA;MyCancerGenome: not present;CancerHotspot: no;3DHotspot: no	MutationAssessor: Error;SIFT: impact: undefined, score: undefined;Polyphen-2: impact: undefined, score: undefined	Missense_Mutation		1	Somatic	NA	broad.mit.edu	6	26104230	26104230	C	T			15	105			699
Pan-Lung Cancer (TCGA, Nat Genet 2016)	TCGA-L9-A8F4-01	Lung Adenocarcinoma	R24W	OncoKB: NA;CIViC: NA;MyCancerGenome: not present;CancerHotspot: no;3DHotspot: no	MutationAssessor: Error;SIFT: impact: undefined, score: undefined;Polyphen-2: impact: undefined, score: undefined	Missense_Mutation			Somatic	NA	broad.mit.edu	6	26104245	26104245	C	T			12	58		88	683
Pan-Lung Cancer (TCGA, Nat Genet 2016)	TCGA-55-7995-01	Lung Adenocarcinoma	D25N	OncoKB: NA;CIViC: NA;MyCancerGenome: not present;CancerHotspot: no;3DHotspot: no	MutationAssessor: Error;SIFT: impact: undefined, score: undefined;Polyphen-2: impact: undefined, score: undefined	Missense_Mutation			Somatic	NA	broad.mit.edu	6	26104248	26104248	G	A			11	93		81	590
Lung Squamous Cell Carcinoma (TCGA, PanCancer Atlas)	TCGA-34-8455-01	Lung Squamous Cell Carcinoma	G29C	OncoKB: NA;CIViC: NA;MyCancerGenome: not present;CancerHotspot: no;3DHotspot: no	MutationAssessor: Error;SIFT: impact: undefined, score: undefined;Polyphen-2: impact: undefined, score: undefined	Missense_Mutation			.	.	.	6	26104260	26104260	G	T			9	88		117	445
Chronic Lymphocytic Leukemia (IUOPA, Nature 2015)	cll_iuopa_2015_467	Chronic Lymphocytic Leukemia	A34T	OncoKB: NA;CIViC: NA;MyCancerGenome: not present;CancerHotspot: no;3DHotspot: no	MutationAssessor: Error;SIFT: impact: undefined, score: undefined;Polyphen-2: impact: undefined, score: undefined	Missense_Mutation			NA	NA	www.unioviedo.es/IUOPA/	6	26104275	26104275	G	A							17
Metastatic Prostate Cancer, SU2C/PCF Dream Team (Robinson et al., Cell 2015)	SC_9060	Prostate Adenocarcinoma	I35V	OncoKB: NA;CIViC: NA;MyCancerGenome: not present;CancerHotspot: no;3DHotspot: no	MutationAssessor: Error;SIFT: impact: undefined, score: undefined;Polyphen-2: impact: undefined, score: undefined	Missense_Mutation			NA	NA	NA	6	26104278	26104278	A	G				170			137
Pan-Lung Cancer (TCGA, Nat Genet 2016)	TCGA-66-2787-01	Lung Squamous Cell Carcinoma	A39S	OncoKB: NA;CIViC: NA;MyCancerGenome: not present;CancerHotspot: no;3DHotspot: no	MutationAssessor: Error;SIFT: impact: undefined, score: undefined;Polyphen-2: impact: undefined, score: undefined	Missense_Mutation		2	Somatic	NA	broad.mit.edu	6	26104290	26104290	G	T			9	35	1	35	421
Sarcoma (TCGA, PanCancer Atlas)	TCGA-DX-A6YT-01	Myxofibrosarcoma	A39S	OncoKB: NA;CIViC: NA;MyCancerGenome: not present;CancerHotspot: no;3DHotspot: no	MutationAssessor: Error;SIFT: impact: undefined, score: undefined;Polyphen-2: impact: undefined, score: undefined	Missense_Mutation		2	.	.	.	6	26104290	26104290	G	T			3	30		40	573
Lung Adenocarcinoma (Broad, Cell 2012)	LUAD-D01382	Lung Adenocarcinoma	A39V	OncoKB: NA;CIViC: NA;MyCancerGenome: not present;CancerHotspot: no;3DHotspot: no	MutationAssessor: Error;SIFT: impact: undefined, score: undefined;Polyphen-2: impact: undefined, score: undefined	Missense_Mutation		2	Unknown	NA	broad.mit.edu	6	26104291	26104291	C	T							188
Liver Hepatocellular Carcinoma (TCGA, Provisional)	TCGA-BC-A8YO-01	Hepatocellular Carcinoma	R40G	OncoKB: NA;CIViC: NA;MyCancerGenome: not present;CancerHotspot: no;3DHotspot: no	MutationAssessor: Error;SIFT: impact: undefined, score: undefined;Polyphen-2: impact: undefined, score: undefined	Missense_Mutation			Somatic	Untested	hgsc.bcm.edu	6	26104293	26104293	C	G			7	139		96	54
Ovarian Serous Cystadenocarcinoma (TCGA, PanCancer Atlas)	TCGA-61-1900-01	Serous Ovarian Cancer	G42R	OncoKB: NA;CIViC: NA;MyCancerGenome: not present;CancerHotspot: no;3DHotspot: no	MutationAssessor: Error;SIFT: impact: undefined, score: undefined;Polyphen-2: impact: undefined, score: undefined	Missense_Mutation		1	.	.	.	6	26104299	26104299	G	C			54	119		87	81
Pan-Lung Cancer (TCGA, Nat Genet 2016)	TCGA-NC-A5HK-01	Lung Squamous Cell Carcinoma	G42V	OncoKB: NA;CIViC: NA;MyCancerGenome: not present;CancerHotspot: no;3DHotspot: no	MutationAssessor: Error;SIFT: impact: undefined, score: undefined;Polyphen-2: impact: undefined, score: undefined	Missense_Mutation		1	Somatic	NA	broad.mit.edu	6	26104300	26104300	G	T			23	60		78	226
Cervical Squamous Cell Carcinoma and Endocervical Adenocarcinoma (TCGA, Provisional)	TCGA-LP-A4AX-01	Cervical Squamous Cell Carcinoma	K45N	OncoKB: NA;CIViC: NA;MyCancerGenome: not present;CancerHotspot: no;3DHotspot: no	MutationAssessor: Error;SIFT: impact: undefined, score: undefined;Polyphen-2: impact: undefined, score: undefined	Missense_Mutation			Somatic	Untested	genome.wustl.edu	6	26104310	26104310	G	C				36		38	46
Skin Cutaneous Melanoma (TCGA, Provisional)	TCGA-FW-A3R5-06	Cutaneous Melanoma	S48F	OncoKB: NA;CIViC: NA;MyCancerGenome: not present;CancerHotspot: no;3DHotspot: no	MutationAssessor: Error;SIFT: impact: undefined, score: undefined;Polyphen-2: impact: undefined, score: undefined	Missense_Mutation		1	Somatic	NA	broad.mit.edu	6	26104318	26104318	C	T			21	53			15944
Liver Hepatocellular Carcinoma (AMC, Hepatology 2014)	H091469	Hepatocellular Adenoma	G49A	OncoKB: NA;CIViC: NA;MyCancerGenome: not present;CancerHotspot: no;3DHotspot: no	MutationAssessor: Error;SIFT: impact: undefined, score: undefined;Polyphen-2: impact: undefined, score: undefined	Missense_Mutation			Somatic	Unknown	LGGM	6	26104321	26104321	G	C				35			76
Bladder Cancer (TCGA, Cell 2017)	TCGA-DK-AA71-01	Bladder Urothelial Carcinoma	L50V	OncoKB: NA;CIViC: NA;MyCancerGenome: not present;CancerHotspot: no;3DHotspot: no	MutationAssessor: Error;SIFT: impact: undefined, score: undefined;Polyphen-2: impact: undefined, score: undefined	Missense_Mutation			Somatic	NaN	broad.mit.edu	6	26104323	26104323	C	G				11			580
Multiple Myeloma (Broad, Cancer Cell 2014)	MM-0533	Multiple Myeloma	I51M	OncoKB: NA;CIViC: NA;MyCancerGenome: not present;CancerHotspot: no;3DHotspot: no	MutationAssessor: Error;SIFT: impact: undefined, score: undefined;Polyphen-2: impact: undefined, score: undefined	Missense_Mutation		1	NA	NA	broad.mit.edu	6	26104328	26104328	C	G							43
Merged Cohort of LGG and GBM (TCGA, Cell 2016)	TCGA-HT-7611-01	Diffuse Glioma	I51T	OncoKB: NA;CIViC: NA;MyCancerGenome: not present;CancerHotspot: no;3DHotspot: no	MutationAssessor: Error;SIFT: impact: undefined, score: undefined;Polyphen-2: impact: undefined, score: undefined	Missense_Mutation		1	NA	NA	ucsc.edu/broad.mit.edu	6	26104327	26104327	T	C			10	52		103	20
Uterine Corpus Endometrial Carcinoma (TCGA, PanCancer Atlas)	TCGA-DI-A1NO-01	Uterine Endometrioid Carcinoma	E53Q	OncoKB: NA;CIViC: NA;MyCancerGenome: not present;CancerHotspot: no;3DHotspot: no	MutationAssessor: Error;SIFT: impact: undefined, score: undefined;Polyphen-2: impact: undefined, score: undefined	Missense_Mutation			.	.	.	6	26104332	26104332	G	C			22	121		36	231
Skin Cutaneous Melanoma (TCGA, Provisional)	TCGA-ER-A19B-06	Cutaneous Melanoma	R56G	OncoKB: NA;CIViC: NA;MyCancerGenome: not present;CancerHotspot: no;3DHotspot: no	MutationAssessor: Error;SIFT: impact: undefined, score: undefined;Polyphen-2: impact: undefined, score: undefined	Missense_Mutation		1	Somatic	NA	broad.mit.edu	6	26104341	26104341	C	G			9	28			109
Bladder Cancer (TCGA, Cell 2017)	TCGA-ZF-AA4W-01	Bladder Urothelial Carcinoma	G57V	OncoKB: NA;CIViC: NA;MyCancerGenome: not present;CancerHotspot: no;3DHotspot: no	MutationAssessor: Error;SIFT: impact: undefined, score: undefined;Polyphen-2: impact: undefined, score: undefined	Missense_Mutation			Somatic	NaN	broad.mit.edu	6	26104345	26104345	G	T				67			512
Lung Adenocarcinoma (TCGA, PanCancer Atlas)	TCGA-86-7955-01	Lung Adenocarcinoma	N65K	OncoKB: NA;CIViC: NA;MyCancerGenome: not present;CancerHotspot: no;3DHotspot: no	MutationAssessor: Error;SIFT: impact: undefined, score: undefined;Polyphen-2: impact: undefined, score: undefined	Missense_Mutation			.	.	.	6	26104370	26104370	C	A			6	46		34	276
Head and Neck Squamous Cell Carcinoma (TCGA, Nature 2015)	TCGA-CV-7414-01	Head and Neck Squamous Cell Carcinoma	R68P	OncoKB: NA;CIViC: NA;MyCancerGenome: not present;CancerHotspot: no;3DHotspot: no	MutationAssessor: Error;SIFT: impact: undefined, score: undefined;Polyphen-2: impact: undefined, score: undefined	Missense_Mutation		1	Unknown	NA	broad.mit.edu	6	26104378	26104378	G	C				29			229
Head and Neck Squamous Cell Carcinoma (TCGA, Nature 2015)	TCGA-CR-5248-01	Head and Neck Squamous Cell Carcinoma	R68P	OncoKB: NA;CIViC: NA;MyCancerGenome: not present;CancerHotspot: no;3DHotspot: no	MutationAssessor: Error;SIFT: impact: undefined, score: undefined;Polyphen-2: impact: undefined, score: undefined	Missense_Mutation		1	Unknown	NA	broad.mit.edu	6	26104378	26104378	G	C				46			304
Small Cell Lung Cancer (CLCGP, Nat Genet 2012)	S00836	Small Cell Lung Cancer	R68P	OncoKB: NA;CIViC: NA;MyCancerGenome: not present;CancerHotspot: no;3DHotspot: no	MutationAssessor: Error;SIFT: impact: undefined, score: undefined;Polyphen-2: impact: undefined, score: undefined	Missense_Mutation		1	NA	Unknown	CLCGP	6	26104378	26104378	G	C							269
Sarcoma (TCGA, Provisional)	TCGA-DX-A3U8-01	Leiomyosarcoma	R68P	OncoKB: NA;CIViC: NA;MyCancerGenome: not present;CancerHotspot: no;3DHotspot: no	MutationAssessor: Error;SIFT: impact: undefined, score: undefined;Polyphen-2: impact: undefined, score: undefined	Missense_Mutation		1	Somatic	Valid	genome.wustl.edu	6	26104378	26104378	G	C			7	30		43	23
Whole-exome sequences (WES) of pretreatment melanoma tumors (UCLA, Cell 2016)	Pt4	Cutaneous Melanoma	R68Q	OncoKB: NA;CIViC: NA;MyCancerGenome: not present;CancerHotspot: no;3DHotspot: no	MutationAssessor: Error;SIFT: impact: undefined, score: undefined;Polyphen-2: impact: undefined, score: undefined	Missense_Mutation		1	NA	NA	NA	6	26104378	26104378	G	A							3662
Gastric Adenocarcinoma (TMUCIH, PNAS 2015)	PGM32	Esophagogastric Adenocarcinoma	R68Q	OncoKB: NA;CIViC: NA;MyCancerGenome: not present;CancerHotspot: no;3DHotspot: no	MutationAssessor: Error;SIFT: impact: undefined, score: undefined;Polyphen-2: impact: undefined, score: undefined	Missense_Mutation		1	NA	NA	NA	6	26104378	26104378	G	A							95
Gastric Adenocarcinoma (TMUCIH, PNAS 2015)	PGM23	Esophagogastric Adenocarcinoma	D69Y	OncoKB: NA;CIViC: NA;MyCancerGenome: not present;CancerHotspot: no;3DHotspot: no	MutationAssessor: Error;SIFT: impact: undefined, score: undefined;Polyphen-2: impact: undefined, score: undefined	Missense_Mutation			NA	NA	NA	6	26104380	26104380	G	T							85
Pan-Lung Cancer (TCGA, Nat Genet 2016)	TCGA-43-2578-01	Lung Squamous Cell Carcinoma	T81I	OncoKB: NA;CIViC: NA;MyCancerGenome: not present;CancerHotspot: no;3DHotspot: no	MutationAssessor: Error;SIFT: impact: undefined, score: undefined;Polyphen-2: impact: undefined, score: undefined	Missense_Mutation		1	Somatic	NA	broad.mit.edu	6	26104417	26104417	C	T			79	45		92	275
Uterine Corpus Endometrial Carcinoma (TCGA, PanCancer Atlas)	TCGA-AJ-A3EL-01	Uterine Endometrioid Carcinoma	A84T	OncoKB: NA;CIViC: NA;MyCancerGenome: not present;CancerHotspot: no;3DHotspot: no	MutationAssessor: Error;SIFT: impact: undefined, score: undefined;Polyphen-2: impact: undefined, score: undefined	Missense_Mutation			.	.	.	6	26104425	26104425	G	A			22	34		96	7390
Bladder Urothelial Carcinoma (BGI, Nat Genet 2013)	B96	Bladder Urothelial Carcinoma	V88A	OncoKB: NA;CIViC: NA;MyCancerGenome: not present;CancerHotspot: no;3DHotspot: no	MutationAssessor: Error;SIFT: impact: undefined, score: undefined;Polyphen-2: impact: undefined, score: undefined	Missense_Mutation		2	NA	NA	BGI	6	26104438	26104438	T	C							259
Liver Hepatocellular Carcinoma (TCGA, Provisional)	TCGA-CC-A7IJ-01	Hepatocellular Carcinoma	Y89C	OncoKB: NA;CIViC: NA;MyCancerGenome: not present;CancerHotspot: no;3DHotspot: no	MutationAssessor: Error;SIFT: impact: undefined, score: undefined;Polyphen-2: impact: undefined, score: undefined	Missense_Mutation			Somatic	Untested	hgsc.bcm.edu	6	26104441	26104441	A	G			16	67		79	119
Colorectal Adenocarcinoma (DFCI, Cell Reports 2016)	coadread_dfci_2016_142275	Colorectal Adenocarcinoma	R93L	OncoKB: NA;CIViC: NA;MyCancerGenome: not present;CancerHotspot: no;3DHotspot: no	MutationAssessor: Error;SIFT: impact: undefined, score: undefined;Polyphen-2: impact: undefined, score: undefined	Missense_Mutation			NA	NA	dfci.harvard.edu	6	26104453	26104453	G	T							84
TCGA data for Esophagus-Stomach Cancers (TCGA, Nature 2017)	TCGA-R6-A6Y2-01	Esophageal Adenocarcinoma	Q94E	OncoKB: NA;CIViC: NA;MyCancerGenome: not present;CancerHotspot: no;3DHotspot: no	MutationAssessor: Error;SIFT: impact: undefined, score: undefined;Polyphen-2: impact: undefined, score: undefined	Missense_Mutation			Somatic	Untested	genome.wustl.edu	6	26104455	26104455	C	G			9	50		60	248
Pan-Lung Cancer (TCGA, Nat Genet 2016)	TCGA-55-8507-01	Lung Adenocarcinoma	G100V	OncoKB: NA;CIViC: NA;MyCancerGenome: not present;CancerHotspot: no;3DHotspot: no	MutationAssessor: Error;SIFT: impact: undefined, score: undefined;Polyphen-2: impact: undefined, score: undefined	Missense_Mutation			Somatic	NA	broad.mit.edu	6	26104474	26104474	G	T			9	54		60	829
Colorectal Adenocarcinoma (DFCI, Cell Reports 2016)	coadread_dfci_2016_2941	Colorectal Adenocarcinoma	F101L	OncoKB: NA;CIViC: NA;MyCancerGenome: not present;CancerHotspot: no;3DHotspot: no	MutationAssessor: Error;SIFT: impact: undefined, score: undefined;Polyphen-2: impact: undefined, score: undefined	Missense_Mutation			NA	NA	dfci.harvard.edu	6	26104478	26104478	C	A							132
Lung Squamous Cell Carcinoma (TCGA, PanCancer Atlas)	TCGA-34-8455-01	Lung Squamous Cell Carcinoma	G29D	OncoKB: NA;CIViC: NA;MyCancerGenome: not present;CancerHotspot: no;3DHotspot: no	MutationAssessor: Error;SIFT: impact: undefined, score: undefined;Polyphen-2: impact: undefined, score: undefined	Missense_Mutation	shallowdel		.	.	.	6	26104261	26104261	G	A	0.08		8	87		116	445	2019-01-01	ENST00000377803.2:c.86G>A
Diffuse Large B cell Lymphoma (DFCI, Nat Med 2018)	DLBCL-RICOVER_102	Diffuse Large B-Cell Lymphoma, NOS	A34T	OncoKB: NA;CIViC: NA;MyCancerGenome: not present;CancerHotspot: no;3DHotspot: no	MutationAssessor: Error;SIFT: impact: undefined, score: undefined;Polyphen-2: impact: undefined, score: undefined	Missense_Mutation			NA	NA	broad.mit.edu	6	26104275	26104275	G	A	0.04		6	142			24	2019-01-01	ENST00000377803.2:c.100G>A

## Sheet: HIST1H4D
Study	Sample ID	Cancer Type	Protein Change	Annotation	Functional Impact	Mutation Type	Copy #	COSMIC	MS	VS	Center	Chromosome	Start Pos	End Pos	Ref	Var	Allele Freq (T)	Allele Freq (N)	Variant Reads	Ref Reads	Variant Reads (N)	Ref Reads (N)	# Mut in Sample
Bladder Urothelial Carcinoma (TCGA, Nature 2014)	TCGA-GC-A3RC-01	Bladder Urothelial Carcinoma	G3A	OncoKB: NA;CIViC: NA;MyCancerGenome: not present;CancerHotspot: no;3DHotspot: no	MutationAssessor: Error;SIFT: impact: deleterious_low_confidence, score: 0.01;Polyphen-2: impact: unknown, score: 0	Missense_Mutation		1	NA	NA	broad.mit.edu	6	26189297	26189297	C	G							308
Liver Hepatocellular Carcinoma (TCGA, Provisional)	TCGA-CC-A7IE-01	Hepatocellular Carcinoma	G3A	OncoKB: NA;CIViC: NA;MyCancerGenome: not present;CancerHotspot: no;3DHotspot: no	MutationAssessor: Error;SIFT: impact: deleterious_low_confidence, score: 0.01;Polyphen-2: impact: unknown, score: 0	Missense_Mutation		1	Somatic	Untested	hgsc.bcm.edu	6	26189297	26189297	C	G			17	43		38	130
Bladder Urothelial Carcinoma (BGI, Nat Genet 2013)	B84	Bladder Urothelial Carcinoma	R4C	OncoKB: NA;CIViC: NA;MyCancerGenome: not present;CancerHotspot: no;3DHotspot: no	MutationAssessor: Error;SIFT: impact: tolerated_low_confidence, score: 0.06;Polyphen-2: impact: possibly_damaging, score: 0.662	Missense_Mutation		1	NA	NA	BGI	6	26189295	26189295	G	A							60
Metastatic Prostate Cancer, SU2C/PCF Dream Team (Robinson et al., Cell 2015)	MO_1263	Prostate Adenocarcinoma	R4C	OncoKB: NA;CIViC: NA;MyCancerGenome: not present;CancerHotspot: no;3DHotspot: no	MutationAssessor: Error;SIFT: impact: tolerated_low_confidence, score: 0.06;Polyphen-2: impact: possibly_damaging, score: 0.662	Missense_Mutation		1	NA	NA	NA	6	26189295	26189295	G	A				196			75
Prostate Adenocarcinoma (Fred Hutchinson CRC, Nat Med 2016)	05-217F1_LN	Prostate Adenocarcinoma	G8E	OncoKB: NA;CIViC: NA;MyCancerGenome: not present;CancerHotspot: no;3DHotspot: no	MutationAssessor: Error;SIFT: impact: deleterious_low_confidence, score: 0;Polyphen-2: impact: probably_damaging, score: 0.932	Missense_Mutation			NA	NA	fhcrc	6	26189282	26189282	C	T				16			57
Prostate Adenocarcinoma (Fred Hutchinson CRC, Nat Med 2016)	05-217N1_LN	Prostate Adenocarcinoma	G8E	OncoKB: NA;CIViC: NA;MyCancerGenome: not present;CancerHotspot: no;3DHotspot: no	MutationAssessor: Error;SIFT: impact: deleterious_low_confidence, score: 0;Polyphen-2: impact: probably_damaging, score: 0.932	Missense_Mutation			NA	NA	fhcrc	6	26189282	26189282	C	T				37			62
Pancreatic Adenocarcinoma (TCGA, PanCancer Atlas)	TCGA-IB-7651-01	Pancreatic Adenocarcinoma	K9N	OncoKB: NA;CIViC: NA;MyCancerGenome: not present;CancerHotspot: no;3DHotspot: no	MutationAssessor: Error;SIFT: impact: tolerated_low_confidence, score: 0.08;Polyphen-2: impact: benign, score: 0.378	Missense_Mutation		1	.	.	.	6	26189278	26189278	C	A			67	469		118	14323
Breast Invasive Carcinoma (Sanger, Nature 2012)	PD3994a	Invasive Breast Carcinoma	K9R	OncoKB: NA;CIViC: NA;MyCancerGenome: not present;CancerHotspot: no;3DHotspot: no	MutationAssessor: Error;SIFT: impact: tolerated_low_confidence, score: 0.06;Polyphen-2: impact: benign, score: 0.143	Missense_Mutation		1	Unknown	Unknown	Sanger	6	26189279	26189279	T	C							15
Colorectal Adenocarcinoma (Genentech, Nature 2012)	587376	Colorectal Adenocarcinoma	G10D	OncoKB: NA;CIViC: NA;MyCancerGenome: not present;CancerHotspot: no;3DHotspot: no	MutationAssessor: Error;SIFT: impact: deleterious_low_confidence, score: 0.03;Polyphen-2: impact: probably_damaging, score: 0.949	Missense_Mutation		1	NA	NA	Genentech	6	26189276	26189276	C	T							9362
Ewing Sarcoma (Institut Cuire, Cancer Discov 2014)	IC248	Ewing Sarcoma	G12C	OncoKB: NA;CIViC: NA;MyCancerGenome: not present;CancerHotspot: no;3DHotspot: no	MutationAssessor: Error;SIFT: impact: deleterious_low_confidence, score: 0.03;Polyphen-2: impact: probably_damaging, score: 0.974	Missense_Mutation			NA	NA	Institut Curie	6	26189271	26189271	C	A			14	39		24	18
Uterine Corpus Endometrial Carcinoma (TCGA, Provisional)	TCGA-B5-A11X-01	Uterine Endometrioid Carcinoma	G15C	OncoKB: NA;CIViC: NA;MyCancerGenome: not present;CancerHotspot: no;3DHotspot: no	MutationAssessor: Error;SIFT: impact: deleterious_low_confidence, score: 0;Polyphen-2: impact: probably_damaging, score: 0.945	Missense_Mutation		1	Somatic	Untested	genome.wustl.edu	6	26189262	26189262	C	A			13	26		55	51
Neuroendocrine Prostate Cancer (Trento/Cornell/Broad 2016)	WCMC10_1_N	Prostate Neuroendocrine Carcinoma	G15S	OncoKB: NA;CIViC: NA;MyCancerGenome: not present;CancerHotspot: no;3DHotspot: no	MutationAssessor: Error;SIFT: impact: tolerated_low_confidence, score: 0.07;Polyphen-2: impact: unknown, score: 0	Missense_Mutation		1	NA	NA	Weill Cornell Medical College	6	26189262	26189262	C	T				74			751
Skin Cutaneous Melanoma (TCGA, PanCancer Atlas)	TCGA-W3-AA1V-06	Cutaneous Melanoma	A16V	OncoKB: NA;CIViC: NA;MyCancerGenome: not present;CancerHotspot: no;3DHotspot: no	MutationAssessor: Error;SIFT: impact: deleterious, score: 0.04;Polyphen-2: impact: unknown, score: 0	Missense_Mutation			.	.	.	6	26189258	26189258	G	A			50	23		80	4563
Liver Hepatocellular Carcinoma (TCGA, Provisional)	TCGA-BC-A112-01	Hepatocellular Carcinoma	R18C	OncoKB: NA;CIViC: NA;MyCancerGenome: not present;CancerHotspot: no;3DHotspot: no	MutationAssessor: Error;SIFT: impact: tolerated, score: 0.08;Polyphen-2: impact: unknown, score: 0	Missense_Mutation			Somatic	Untested	hgsc.bcm.edu	6	26189253	26189253	G	A			32	43		64	234
Ovarian Serous Cystadenocarcinoma (TCGA, PanCancer Atlas)	TCGA-61-2003-01	Serous Ovarian Cancer	R18C	OncoKB: NA;CIViC: NA;MyCancerGenome: not present;CancerHotspot: no;3DHotspot: no	MutationAssessor: Error;SIFT: impact: tolerated, score: 0.08;Polyphen-2: impact: unknown, score: 0	Missense_Mutation			.	.	.	6	26189253	26189253	G	A			33	175		150	98
Hepatocellular Carcinomas (Inserm, Nat Genet 2015)	CHC1044T	Hepatocellular Carcinoma	H19Y	OncoKB: NA;CIViC: NA;MyCancerGenome: not present;CancerHotspot: no;3DHotspot: no	MutationAssessor: Error;SIFT: impact: deleterious, score: 0.03;Polyphen-2: impact: benign, score: 0.101	Missense_Mutation			NA	NA	inserm.fr	6	26189250	26189250	G	A							91
Pan-Lung Cancer (TCGA, Nat Genet 2016)	TCGA-56-8629-01	Lung Squamous Cell Carcinoma	R20G	OncoKB: NA;CIViC: NA;MyCancerGenome: not present;CancerHotspot: no;3DHotspot: no	MutationAssessor: Error;SIFT: impact: deleterious, score: 0;Polyphen-2: impact: benign, score: 0.231	Missense_Mutation			Somatic	NA	broad.mit.edu	6	26189247	26189247	G	C			22	114		109	195
Colorectal Adenocarcinoma (DFCI, Cell Reports 2016)	coadread_dfci_2016_2934	Colorectal Adenocarcinoma	K21N	OncoKB: NA;CIViC: NA;MyCancerGenome: not present;CancerHotspot: no;3DHotspot: no	MutationAssessor: Error;SIFT: impact: deleterious, score: 0.03;Polyphen-2: impact: benign, score: 0.115	Missense_Mutation			NA	NA	dfci.harvard.edu	6	26189242	26189242	C	G							50
Cutaneous Squamous Cell Carcinoma (MD Anderson, Clin Cancer Res 2014)	CSCC-56-T	Cutaneous Squamous Cell Carcinoma	V22I	OncoKB: NA;CIViC: NA;MyCancerGenome: not present;CancerHotspot: no;3DHotspot: no	MutationAssessor: Error;SIFT: impact: tolerated, score: 0.28;Polyphen-2: impact: benign, score: 0.026	Missense_Mutation			Somatic	Untested	hgsc.bcm.edu	6	26189241	26189241	C	T			17	59		84	2029
Esophageal Adenocarcinoma (Broad, Nat Genet 2013)	ESO-0009	Esophageal Adenocarcinoma	N26S	OncoKB: NA;CIViC: NA;MyCancerGenome: not present;CancerHotspot: no;3DHotspot: no	MutationAssessor: Error;SIFT: impact: tolerated, score: 0.07;Polyphen-2: impact: benign, score: 0.325	Missense_Mutation		1	Somatic	NA	broad.mit.edu	6	26189228	26189228	T	C				73			132
Pan-Lung Cancer (TCGA, Nat Genet 2016)	TCGA-77-7335-01	Lung Squamous Cell Carcinoma	I27M	OncoKB: NA;CIViC: NA;MyCancerGenome: not present;CancerHotspot: no;3DHotspot: no	MutationAssessor: Error;SIFT: impact: deleterious, score: 0.02;Polyphen-2: impact: probably_damaging, score: 0.989	Missense_Mutation			Somatic	NA	broad.mit.edu	6	26189224	26189224	G	C			19	49	1	85	194
Pan-Lung Cancer (TCGA, Nat Genet 2016)	TCGA-99-8025-01	Lung Adenocarcinoma	I30M	OncoKB: NA;CIViC: NA;MyCancerGenome: not present;CancerHotspot: no;3DHotspot: no	MutationAssessor: Error;SIFT: impact: deleterious, score: 0;Polyphen-2: impact: probably_damaging, score: 0.991	Missense_Mutation		1	Somatic	NA	broad.mit.edu	6	26189215	26189215	G	C			17	81		53	426
Pan-Lung Cancer (TCGA, Nat Genet 2016)	TCGA-85-8072-01	Lung Squamous Cell Carcinoma	K32R	OncoKB: NA;CIViC: NA;MyCancerGenome: not present;CancerHotspot: no;3DHotspot: no	MutationAssessor: Error;SIFT: impact: deleterious, score: 0;Polyphen-2: impact: benign, score: 0.433	Missense_Mutation			Somatic	NA	broad.mit.edu	6	26189210	26189210	T	C			7	35		48	169
Lung Adenocarcinoma (TCGA, PanCancer Atlas)	TCGA-05-5425-01	Lung Adenocarcinoma	A34T	OncoKB: NA;CIViC: NA;MyCancerGenome: not present;CancerHotspot: no;3DHotspot: no	MutationAssessor: Error;SIFT: impact: tolerated, score: 0.06;Polyphen-2: impact: possibly_damaging, score: 0.575	Missense_Mutation		1	.	.	.	6	26189205	26189205	C	T			5	78		77	537
Stomach Adenocarcinoma (TCGA, PanCancer Atlas)	TCGA-VQ-AA6D-01	Tubular Stomach Adenocarcinoma	A34V	OncoKB: NA;CIViC: NA;MyCancerGenome: not present;CancerHotspot: no;3DHotspot: no	MutationAssessor: Error;SIFT: impact: deleterious, score: 0.04;Polyphen-2: impact: probably_damaging, score: 0.952	Missense_Mutation		1	.	.	.	6	26189204	26189204	G	A			25	37		80	698
Multiple Myeloma (Broad, Cancer Cell 2014)	MM-0447	Multiple Myeloma	I35T	OncoKB: NA;CIViC: NA;MyCancerGenome: not present;CancerHotspot: no;3DHotspot: no	MutationAssessor: Error;SIFT: impact: deleterious, score: 0;Polyphen-2: impact: probably_damaging, score: 0.999	Missense_Mutation			NA	NA	broad.mit.edu	6	26189201	26189201	A	G							47
Bladder Cancer (TCGA, Cell 2017)	TCGA-FD-A6TB-01	Bladder Urothelial Carcinoma	R40C	OncoKB: NA;CIViC: NA;MyCancerGenome: not present;CancerHotspot: no;3DHotspot: no	MutationAssessor: Error;SIFT: impact: deleterious, score: 0.03;Polyphen-2: impact: probably_damaging, score: 0.917	Missense_Mutation		1	Somatic	NaN	broad.mit.edu	6	26189187	26189187	G	A				111			188
Breast Invasive Carcinoma (TCGA, Cell 2015)	TCGA-D8-A1JA-01	Breast Invasive Ductal Carcinoma	R40C	OncoKB: NA;CIViC: NA;MyCancerGenome: not present;CancerHotspot: no;3DHotspot: no	MutationAssessor: Error;SIFT: impact: deleterious, score: 0.03;Polyphen-2: impact: probably_damaging, score: 0.917	Missense_Mutation		1	NA	NA	genome.wustl.edu;unc.edu	6	26189187	26189187	G	A			32	31		41	764
Pancreatic Adenocarcinoma (QCMG, Nature 2016)	ICGC_0542	Pancreatic Adenocarcinoma	G42S	OncoKB: NA;CIViC: NA;MyCancerGenome: not present;CancerHotspot: no;3DHotspot: no	MutationAssessor: Error;SIFT: impact: deleterious_low_confidence, score: 0.03;Polyphen-2: impact: probably_damaging, score: 0.956	Missense_Mutation			Somatic	NA	qcmg.uq.edu.au	6	26189181	26189181	C	T							48
Skin Cutaneous Melanoma (TCGA, Provisional)	TCGA-EE-A2GH-06	Cutaneous Melanoma	G43V	OncoKB: NA;CIViC: NA;MyCancerGenome: not present;CancerHotspot: no;3DHotspot: no	MutationAssessor: Error;SIFT: impact: deleterious_low_confidence, score: 0;Polyphen-2: impact: probably_damaging, score: 1	Missense_Mutation		1	Somatic	NA	broad.mit.edu	6	26189177	26189177	C	A			14	37			275
Bladder Cancer (TCGA, Cell 2017)	TCGA-KQ-A41R-01	Bladder Urothelial Carcinoma	K45N	OncoKB: NA;CIViC: NA;MyCancerGenome: not present;CancerHotspot: no;3DHotspot: no	MutationAssessor: Error;SIFT: impact: deleterious_low_confidence, score: 0.01;Polyphen-2: impact: possibly_damaging, score: 0.79	Missense_Mutation			Somatic	NaN	broad.mit.edu	6	26189170	26189170	C	A				90			665
Pancreatic Adenocarcinoma (QCMG, Nature 2016)	ICGC_0227	Pancreatic Adenocarcinoma	S48F	OncoKB: NA;CIViC: NA;MyCancerGenome: not present;CancerHotspot: no;3DHotspot: no	MutationAssessor: Error;SIFT: impact: deleterious, score: 0;Polyphen-2: impact: probably_damaging, score: 0.994	Missense_Mutation			Somatic	NA	qcmg.uq.edu.au	6	26189162	26189162	G	A							80
Hepatocellular Carcinomas (Inserm, Nat Genet 2015)	CHC1183T	Hepatocellular Carcinoma	S48Y	OncoKB: NA;CIViC: NA;MyCancerGenome: not present;CancerHotspot: no;3DHotspot: no	MutationAssessor: Error;SIFT: impact: deleterious, score: 0;Polyphen-2: impact: probably_damaging, score: 0.954	Missense_Mutation			NA	NA	inserm.fr	6	26189162	26189162	G	T							68
Pan-Lung Cancer (TCGA, Nat Genet 2016)	TCGA-56-8628-01	Lung Squamous Cell Carcinoma	G49V	OncoKB: NA;CIViC: NA;MyCancerGenome: not present;CancerHotspot: no;3DHotspot: no	MutationAssessor: Error;SIFT: impact: deleterious, score: 0.02;Polyphen-2: impact: probably_damaging, score: 0.969	Missense_Mutation			Somatic	NA	broad.mit.edu	6	26189159	26189159	C	A			19	67		97	360
Head and Neck Squamous Cell Carcinoma (TCGA, Nature 2015)	TCGA-CR-6470-01	Head and Neck Squamous Cell Carcinoma	L50F	OncoKB: NA;CIViC: NA;MyCancerGenome: not present;CancerHotspot: no;3DHotspot: no	MutationAssessor: Error;SIFT: impact: deleterious, score: 0.02;Polyphen-2: impact: benign, score: 0.091	Missense_Mutation			Unknown	NA	broad.mit.edu	6	26189157	26189157	G	A				60			40
Pancreatic Cancer (UTSW, Nat Commun 2015)	PDA_052	Pancreatic Adenocarcinoma	I51T	OncoKB: NA;CIViC: NA;MyCancerGenome: not present;CancerHotspot: no;3DHotspot: no	MutationAssessor: Error;SIFT: impact: deleterious, score: 0.02;Polyphen-2: impact: possibly_damaging, score: 0.715	Missense_Mutation			NA	NA	UT Southwestern	6	26189153	26189153	A	G							54
Bladder Urothelial Carcinoma (BGI, Nat Genet 2013)	B47	Bladder Urothelial Carcinoma	E54K	OncoKB: NA;CIViC: NA;MyCancerGenome: not present;CancerHotspot: no;3DHotspot: no	MutationAssessor: Error;SIFT: impact: deleterious, score: 0;Polyphen-2: impact: probably_damaging, score: 0.957	Missense_Mutation		2	NA	NA	BGI	6	26189145	26189145	C	T							147
Breast Invasive Carcinoma (TCGA, Cell 2015)	TCGA-AC-A5XS-01	Breast Invasive Lobular Carcinoma	G57V	OncoKB: NA;CIViC: NA;MyCancerGenome: not present;CancerHotspot: no;3DHotspot: no	MutationAssessor: Error;SIFT: impact: deleterious, score: 0.01;Polyphen-2: impact: benign, score: 0.222	Missense_Mutation			NA	NA	genome.wustl.edu;unc.edu	6	26189135	26189135	C	A			12	50		69	383
Low-Grade Gliomas (UCSF, Science 2014).	P15_Pri	Oligoastrocytoma	V58E	OncoKB: NA;CIViC: NA;MyCancerGenome: not present;CancerHotspot: no;3DHotspot: no	MutationAssessor: Error;SIFT: impact: deleterious, score: 0;Polyphen-2: impact: probably_damaging, score: 0.999	Missense_Mutation			NA	Untested	UCSF	6	26189132	26189132	A	T			52	126		75	20
Low-Grade Gliomas (UCSF, Science 2014).	P15_Rec	Oligoastrocytoma	V58E	OncoKB: NA;CIViC: NA;MyCancerGenome: not present;CancerHotspot: no;3DHotspot: no	MutationAssessor: Error;SIFT: impact: deleterious, score: 0;Polyphen-2: impact: probably_damaging, score: 0.999	Missense_Mutation			NA	Untested	UCSF	6	26189132	26189132	A	T			45	59		75	23
Cutaneous Squamous Cell Carcinoma (MD Anderson, Clin Cancer Res 2014)	CSCC-55-T	Cutaneous Squamous Cell Carcinoma	E64K	OncoKB: NA;CIViC: NA;MyCancerGenome: not present;CancerHotspot: no;3DHotspot: no	MutationAssessor: Error;SIFT: impact: tolerated, score: 0.07;Polyphen-2: impact: possibly_damaging, score: 0.655	Missense_Mutation			Somatic	Untested	hgsc.bcm.edu	6	26189115	26189115	C	T			31	126		92	2598
Bladder Cancer (TCGA, Cell 2017)	TCGA-E5-A4U1-01	Bladder Urothelial Carcinoma	E64Q	OncoKB: NA;CIViC: NA;MyCancerGenome: not present;CancerHotspot: no;3DHotspot: no	MutationAssessor: Error;SIFT: impact: deleterious, score: 0;Polyphen-2: impact: possibly_damaging, score: 0.775	Missense_Mutation			Somatic	NaN	broad.mit.edu	6	26189115	26189115	C	G				26			588
Small Cell Lung Cancer (U Cologne, Nature 2015)	S01366	Small Cell Lung Cancer	D69N	OncoKB: NA;CIViC: NA;MyCancerGenome: not present;CancerHotspot: no;3DHotspot: no	MutationAssessor: Error;SIFT: impact: deleterious, score: 0.03;Polyphen-2: impact: probably_damaging, score: 0.954	Missense_Mutation		3	NA	NA	ucologne	6	26189100	26189100	C	T							620
Colon Adenocarcinoma (TCGA, PanCancer Atlas)	TCGA-AA-3712-01	Colon Adenocarcinoma	D69N	OncoKB: NA;CIViC: NA;MyCancerGenome: not present;CancerHotspot: no;3DHotspot: no	MutationAssessor: Error;SIFT: impact: deleterious, score: 0.03;Polyphen-2: impact: probably_damaging, score: 0.954	Missense_Mutation		3	.	.	.	6	26189100	26189100	C	T			48	146		87	115
Lung Adenocarcinoma (TCGA, PanCancer Atlas)	TCGA-55-8302-01	Lung Adenocarcinoma	A70P	OncoKB: NA;CIViC: NA;MyCancerGenome: not present;CancerHotspot: no;3DHotspot: no	MutationAssessor: Error;SIFT: impact: deleterious, score: 0;Polyphen-2: impact: probably_damaging, score: 0.999	Missense_Mutation			.	.	.	6	26189097	26189097	C	G			21	122		107	615
Skin Cutaneous Melanoma (Broad, Cell 2012)	MEL-JWCI-WGS-11	Cutaneous Melanoma	T74A	OncoKB: NA;CIViC: NA;MyCancerGenome: not present;CancerHotspot: no;3DHotspot: no	MutationAssessor: Error;SIFT: impact: deleterious, score: 0.04;Polyphen-2: impact: possibly_damaging, score: 0.788	Missense_Mutation		3	NA	NA	broad.mit.edu	6	26189085	26189085	T	C							539
Esophageal Adenocarcinoma (Broad, Nat Genet 2013)	ESO-409	Esophageal Adenocarcinoma	E75K	OncoKB: NA;CIViC: NA;MyCancerGenome: not present;CancerHotspot: no;3DHotspot: no	MutationAssessor: Error;SIFT: impact: deleterious, score: 0.05;Polyphen-2: impact: possibly_damaging, score: 0.553	Missense_Mutation		1	Somatic	NA	broad.mit.edu	6	26189082	26189082	C	T				85			96
Pan-Lung Cancer (TCGA, Nat Genet 2016)	TCGA-66-2763-01	Lung Squamous Cell Carcinoma	K78I	OncoKB: NA;CIViC: NA;MyCancerGenome: not present;CancerHotspot: no;3DHotspot: no	MutationAssessor: Error;SIFT: impact: deleterious, score: 0;Polyphen-2: impact: possibly_damaging, score: 0.801	Missense_Mutation		1	Somatic	NA	broad.mit.edu	6	26189072	26189072	T	A			46	94		146	346
Uterine Corpus Endometrial Carcinoma (TCGA, Provisional)	TCGA-B5-A11E-01	Uterine Endometrioid Carcinoma	K80R	OncoKB: NA;CIViC: NA;MyCancerGenome: not present;CancerHotspot: no;3DHotspot: no	MutationAssessor: Error;SIFT: impact: tolerated, score: 0.05;Polyphen-2: impact: benign, score: 0.096	Missense_Mutation		1	Somatic	Untested	genome.wustl.edu	6	26189066	26189066	T	C			19	25		52	8228
Pan-Lung Cancer (TCGA, Nat Genet 2016)	TCGA-55-7570-01	Lung Adenocarcinoma	T83A	OncoKB: NA;CIViC: NA;MyCancerGenome: not present;CancerHotspot: no;3DHotspot: no	MutationAssessor: Error;SIFT: impact: deleterious, score: 0;Polyphen-2: impact: benign, score: 0.179	Missense_Mutation		1	Somatic	NA	broad.mit.edu	6	26189058	26189058	T	C			23	87		124	330
Colon Adenocarcinoma (TCGA, PanCancer Atlas)	TCGA-CA-6718-01	Colon Adenocarcinoma	A84D	OncoKB: NA;CIViC: NA;MyCancerGenome: not present;CancerHotspot: no;3DHotspot: no	MutationAssessor: Error;SIFT: impact: deleterious, score: 0.02;Polyphen-2: impact: possibly_damaging, score: 0.611	Missense_Mutation		1	.	.	.	6	26189054	26189054	G	T			19	57	1	65	3209
Colon Adenocarcinoma (TCGA, PanCancer Atlas)	TCGA-D5-6930-01	Mucinous Adenocarcinoma of the Colon and Rectum	A84T	OncoKB: NA;CIViC: NA;MyCancerGenome: not present;CancerHotspot: no;3DHotspot: no	MutationAssessor: Error;SIFT: impact: tolerated, score: 0.07;Polyphen-2: impact: benign, score: 0.094	Missense_Mutation		1	.	.	.	6	26189055	26189055	C	T			11	76		65	1215
Lung Adenocarcinoma (TCGA, PanCancer Atlas)	TCGA-17-Z015-01	Lung Adenocarcinoma	A84T	OncoKB: NA;CIViC: NA;MyCancerGenome: not present;CancerHotspot: no;3DHotspot: no	MutationAssessor: Error;SIFT: impact: tolerated, score: 0.07;Polyphen-2: impact: benign, score: 0.094	Missense_Mutation		1	.	.	.	6	26189055	26189055	C	T			24	89		118	468
Pan-Lung Cancer (TCGA, Nat Genet 2016)	TCGA-55-A494-01	Lung Adenocarcinoma	R93S	OncoKB: NA;CIViC: NA;MyCancerGenome: not present;CancerHotspot: no;3DHotspot: no	MutationAssessor: Error;SIFT: impact: deleterious, score: 0;Polyphen-2: impact: possibly_damaging, score: 0.853	Missense_Mutation			Somatic	NA	broad.mit.edu	6	26189028	26189028	G	T			49	65		84	204
Mesothelioma (TCGA, Provisional)	TCGA-SC-A6LR-01	Pleural Mesothelioma, Epithelioid Type	G95E	OncoKB: NA;CIViC: NA;MyCancerGenome: not present;CancerHotspot: no;3DHotspot: no	MutationAssessor: Error;SIFT: impact: deleterious, score: 0.02;Polyphen-2: impact: possibly_damaging, score: 0.889	Missense_Mutation			Somatic	NA	broad.mit.edu	6	26189021	26189021	C	T			11	46			50
Head and Neck Squamous Cell Carcinoma (TCGA, Provisional)	TCGA-CN-A497-01	Head and Neck Squamous Cell Carcinoma	R96L	OncoKB: NA;CIViC: NA;MyCancerGenome: not present;CancerHotspot: no;3DHotspot: no	MutationAssessor: Error;SIFT: impact: deleterious, score: 0;Polyphen-2: impact: possibly_damaging, score: 0.73	Missense_Mutation			Somatic	NA	broad.mit.edu	6	26189018	26189018	C	A			7	40			315
Lymphoid Neoplasm Diffuse Large B-cell Lymphoma (TCGA, Provisional)	TCGA-G8-6906-01	Diffuse Large B-Cell Lymphoma	Y99D	OncoKB: NA;CIViC: NA;MyCancerGenome: not present;CancerHotspot: no;3DHotspot: no	MutationAssessor: Error;SIFT: impact: deleterious_low_confidence, score: 0;Polyphen-2: impact: probably_damaging, score: 0.998	Missense_Mutation		1	Somatic	Untested	hgsc.bcm.edu	6	26189010	26189010	A	C			71	81		163	566
Colon Adenocarcinoma (TCGA, PanCancer Atlas)	TCGA-A6-4105-01	Colon Adenocarcinoma	Y99H	OncoKB: NA;CIViC: NA;MyCancerGenome: not present;CancerHotspot: no;3DHotspot: no	MutationAssessor: Error;SIFT: impact: deleterious_low_confidence, score: 0.02;Polyphen-2: impact: probably_damaging, score: 0.986	Missense_Mutation		1	.	.	.	6	26189010	26189010	A	G			80	127		200	145
The Metastatic Breast Cancer Project (Provisional, April 2018)	MBC-MBCProject_57iLiJIl-Tumor-SM-CGLIV	Breast Invasive Ductal Carcinoma	F101L	OncoKB: NA;CIViC: NA;MyCancerGenome: not present;CancerHotspot: no;3DHotspot: no	MutationAssessor: Error;SIFT: impact: tolerated, score: 0.08;Polyphen-2: impact: benign, score: 0.018	Missense_Mutation			Somatic	---	broad.mit.edu	6	26189002	26189002	G	T							762
Pan-Lung Cancer (TCGA, Nat Genet 2016)	TCGA-55-A490-01	Lung Adenocarcinoma	G102C	OncoKB: NA;CIViC: NA;MyCancerGenome: not present;CancerHotspot: no;3DHotspot: no	MutationAssessor: Error;SIFT: impact: deleterious_low_confidence, score: 0;Polyphen-2: impact: probably_damaging, score: 0.994	Missense_Mutation			Somatic	NA	broad.mit.edu	6	26189001	26189001	C	A			23	81		88	1145
Uterine Corpus Endometrial Carcinoma (TCGA, PanCancer Atlas)	TCGA-B5-A1N2-01	Uterine Serous Carcinoma/Uterine Papillary Serous Carcinoma	G102R	OncoKB: NA;CIViC: NA;MyCancerGenome: not present;CancerHotspot: no;3DHotspot: no	MutationAssessor: Error;SIFT: impact: deleterious_low_confidence, score: 0.05;Polyphen-2: impact: probably_damaging, score: 0.973	Missense_Mutation			.	.	.	6	26189001	26189001	C	G			6	73		65	141
Colorectal Adenocarcinoma (DFCI, Cell Reports 2016)	coadread_dfci_2016_613	Colorectal Adenocarcinoma	G103D	OncoKB: NA;CIViC: NA;MyCancerGenome: not present;CancerHotspot: no;3DHotspot: no	MutationAssessor: Error;SIFT: impact: deleterious_low_confidence, score: 0;Polyphen-2: impact: possibly_damaging, score: 0.842	Missense_Mutation			NA	NA	dfci.harvard.edu	6	26188997	26188997	C	T							493
Metastatic Prostate Adenocarcinoma (SU2C/PCF Dream Team, PNAS 2019)	PM10-TM	Prostate Adenocarcinoma	G15S	OncoKB: NA;CIViC: NA;MyCancerGenome: not present;CancerHotspot: no;3DHotspot: no	MutationAssessor: Error;SIFT: impact: tolerated_low_confidence, score: 0.07;Polyphen-2: impact: unknown, score: 0	Missense_Mutation	diploid	1	Somatic	Untested	broad.mit.edu	6	26189262	26189262	C	T	0.34		38	74			950	2019-01-01	ENST00000340756.2:c.43G>A
Upper Tract Urothelial Carcinoma (Cornell/Baylor/MDACC, Nat Comm 2019)	WCM-UTUC-0764	Upper Tract Urothelial Carcinoma	I27S	OncoKB: NA;CIViC: NA;MyCancerGenome: not present;CancerHotspot: no;3DHotspot: no	MutationAssessor: Error;SIFT: impact: deleterious, score: 0;Polyphen-2: impact: possibly_damaging, score: 0.907	Missense_Mutation			Somatic	NA	WCM	6	26189225	26189225	A	C	0.17		10	50		116	60	2019-01-01	ENST00000340756.2:c.80T>G
Esophageal Adenocarcinoma (DFCI, Nat Genet 2013)	ESO-0009	Esophageal Adenocarcinoma	T31I	OncoKB: NA;CIViC: NA;MyCancerGenome: not present;CancerHotspot: no;3DHotspot: no	MutationAssessor: Error;SIFT: impact: deleterious, score: 0.02;Polyphen-2: impact: probably_damaging, score: 0.971	Missense_Mutation		1	Somatic	NA	broad.mit.edu	6	26189213	26189213	G	A	0.26		24	70			132	2019-01-01	ENST00000340756.2:c.92C>T
Lung Adenocarcinoma (TCGA, PanCancer Atlas)	TCGA-99-8025-01	Lung Adenocarcinoma	D69Y	OncoKB: NA;CIViC: NA;MyCancerGenome: not present;CancerHotspot: no;3DHotspot: no	MutationAssessor: Error;SIFT: impact: deleterious, score: 0.01;Polyphen-2: impact: possibly_damaging, score: 0.66	Missense_Mutation	gain	3	.	.	.	6	26189100	26189100	C	A	0.11		13	109		77	435	2019-01-01	ENST00000340756.2:c.205G>T
Metastatic Prostate Adenocarcinoma (SU2C/PCF Dream Team, PNAS 2019)	SC_9183_T	Prostate Adenocarcinoma	V82I	OncoKB: NA;CIViC: NA;MyCancerGenome: not present;CancerHotspot: no;3DHotspot: no	MutationAssessor: Error;SIFT: impact: tolerated, score: 0.07;Polyphen-2: impact: possibly_damaging, score: 0.577	Missense_Mutation	diploid		Somatic	Untested	broad.mit.edu	6	26189061	26189061	C	T	0.29		146	349			845	2019-01-01	ENST00000340756.2:c.244G>A

## Sheet: HIST1H4E
Study	Sample ID	Cancer Type	Protein Change	Annotation	Functional Impact	Mutation Type	Copy #	COSMIC	MS	VS	Center	Chromosome	Start Pos	End Pos	Ref	Var	Allele Freq (T)	Allele Freq (N)	Variant Reads	Ref Reads	Variant Reads (N)	Ref Reads (N)	# Mut in Sample
Colorectal Adenocarcinoma (DFCI, Cell Reports 2016)	coadread_dfci_2016_291403	Colorectal Adenocarcinoma	S2C	OncoKB: NA;CIViC: NA;MyCancerGenome: not present;CancerHotspot: no;3DHotspot: no	MutationAssessor: Error;SIFT: impact: undefined, score: undefined;Polyphen-2: impact: undefined, score: undefined	Missense_Mutation			NA	NA	dfci.harvard.edu	6	26204877	26204877	C	G							173
Adrenocortical Carcinoma (TCGA, Provisional)	TCGA-OR-A5LF-01	Adrenocortical Carcinoma	S2F	OncoKB: NA;CIViC: NA;MyCancerGenome: not present;CancerHotspot: no;3DHotspot: no	MutationAssessor: Error;SIFT: impact: undefined, score: undefined;Polyphen-2: impact: undefined, score: undefined	Missense_Mutation			Somatic	Untested	hgsc.bcm.edu;broad.mit.edu;ucsc.edu;bcgsc.ca;mdanderson.org	6	26204877	26204877	C	T			30	44		75	80
Colorectal Adenocarcinoma (DFCI, Cell Reports 2016)	coadread_dfci_2016_4500	Colorectal Adenocarcinoma	R4C	OncoKB: NA;CIViC: NA;MyCancerGenome: not present;CancerHotspot: no;3DHotspot: no	MutationAssessor: Error;SIFT: impact: undefined, score: undefined;Polyphen-2: impact: undefined, score: undefined	Missense_Mutation			NA	NA	dfci.harvard.edu	6	26204882	26204882	C	T							834
Pancreatic Adenocarcinoma (QCMG, Nature 2016)	ICGC_0338	Pancreatic Adenocarcinoma	R4H	OncoKB: NA;CIViC: NA;MyCancerGenome: not present;CancerHotspot: no;3DHotspot: no	MutationAssessor: Error;SIFT: impact: undefined, score: undefined;Polyphen-2: impact: undefined, score: undefined	Missense_Mutation			Somatic	NA	qcmg.uq.edu.au	6	26204883	26204883	G	A							52
Pan-Lung Cancer (TCGA, Nat Genet 2016)	TCGA-91-6829-01	Lung Adenocarcinoma	G5C	OncoKB: NA;CIViC: NA;MyCancerGenome: not present;CancerHotspot: no;3DHotspot: no	MutationAssessor: Error;SIFT: impact: undefined, score: undefined;Polyphen-2: impact: undefined, score: undefined	Missense_Mutation		2	Somatic	NA	broad.mit.edu	6	26204885	26204885	G	T			45	94		124	562
Breast Invasive Carcinoma (British Columbia, Nature 2012)	SA071	Invasive Breast Carcinoma	G5D	OncoKB: NA;CIViC: NA;MyCancerGenome: not present;CancerHotspot: no;3DHotspot: no	MutationAssessor: Error;SIFT: impact: undefined, score: undefined;Polyphen-2: impact: undefined, score: undefined	Missense_Mutation		2	NA	NA	BC	6	26204886	26204886	G	A							92
Liver Hepatocellular Carcinoma (AMC, Hepatology 2014)	H090866	Hepatocellular Adenoma	G5S	OncoKB: NA;CIViC: NA;MyCancerGenome: not present;CancerHotspot: no;3DHotspot: no	MutationAssessor: Error;SIFT: impact: undefined, score: undefined;Polyphen-2: impact: undefined, score: undefined	Missense_Mutation		2	Somatic	Unknown	LGGM	6	26204885	26204885	G	A				44			235
Head and Neck Squamous Cell Carcinoma (TCGA, Provisional)	TCGA-CR-5247-01	Head and Neck Squamous Cell Carcinoma	G5S	OncoKB: NA;CIViC: NA;MyCancerGenome: not present;CancerHotspot: no;3DHotspot: no	MutationAssessor: Error;SIFT: impact: undefined, score: undefined;Polyphen-2: impact: undefined, score: undefined	Missense_Mutation		2	Somatic	NA	broad.mit.edu	6	26204885	26204885	G	A			30	63			73
Liver Hepatocellular Carcinoma (TCGA, Provisional)	TCGA-DD-A118-01	Hepatocellular Carcinoma	K9N	OncoKB: NA;CIViC: NA;MyCancerGenome: not present;CancerHotspot: no;3DHotspot: no	MutationAssessor: Error;SIFT: impact: undefined, score: undefined;Polyphen-2: impact: undefined, score: undefined	Missense_Mutation			Somatic	Untested	hgsc.bcm.edu	6	26204899	26204899	G	C			35	124		139	88
Esophageal Adenocarcinoma (Broad, Nat Genet 2013)	ESO-173	Esophageal Adenocarcinoma	G10A	OncoKB: NA;CIViC: NA;MyCancerGenome: not present;CancerHotspot: no;3DHotspot: no	MutationAssessor: Error;SIFT: impact: undefined, score: undefined;Polyphen-2: impact: undefined, score: undefined	Missense_Mutation		1	Somatic	NA	broad.mit.edu	6	26204901	26204901	G	C				69			138
Bladder Cancer (TCGA, Cell 2017)	TCGA-ZF-A9R7-01	Bladder Urothelial Carcinoma	G10R	OncoKB: NA;CIViC: NA;MyCancerGenome: not present;CancerHotspot: no;3DHotspot: no	MutationAssessor: Error;SIFT: impact: undefined, score: undefined;Polyphen-2: impact: undefined, score: undefined	Missense_Mutation		1	Somatic	NaN	broad.mit.edu	6	26204900	26204900	G	A				43			631
Pan-Lung Cancer (TCGA, Nat Genet 2016)	TCGA-44-A4SS-01	Lung Adenocarcinoma	R18G	OncoKB: NA;CIViC: NA;MyCancerGenome: not present;CancerHotspot: no;3DHotspot: no	MutationAssessor: Error;SIFT: impact: undefined, score: undefined;Polyphen-2: impact: undefined, score: undefined	Missense_Mutation			Somatic	NA	broad.mit.edu	6	26204924	26204924	C	G			28	90		96	431
Primary Central Nervous System Lymphoma (Mayo Clinic, Clin Cancer Res 2015)	PCNSL_5	Primary CNS Lymphoma	R20C	OncoKB: NA;CIViC: NA;MyCancerGenome: not present;CancerHotspot: no;3DHotspot: no	MutationAssessor: Error;SIFT: impact: undefined, score: undefined;Polyphen-2: impact: undefined, score: undefined	Missense_Mutation		1	NA	NA	Mayo Clinic	6	26204930	26204930	C	T							126
The Metastatic Breast Cancer Project (Provisional, April 2018)	MBC-MBCProject_43UpSwhz-Tumor-SM-DL4W8	Breast Invasive Ductal Carcinoma	R20L	OncoKB: NA;CIViC: NA;MyCancerGenome: not present;CancerHotspot: no;3DHotspot: no	MutationAssessor: Error;SIFT: impact: undefined, score: undefined;Polyphen-2: impact: undefined, score: undefined	Missense_Mutation		1	Somatic	---	broad.mit.edu	6	26204931	26204931	G	T							71
Pan-Lung Cancer (TCGA, Nat Genet 2016)	TCGA-55-1596-01	Lung Adenocarcinoma	R20S	OncoKB: NA;CIViC: NA;MyCancerGenome: not present;CancerHotspot: no;3DHotspot: no	MutationAssessor: Error;SIFT: impact: undefined, score: undefined;Polyphen-2: impact: undefined, score: undefined	Missense_Mutation		1	Somatic	NA	broad.mit.edu	6	26204930	26204930	C	A			26	110		218	160
Pan-Lung Cancer (TCGA, Nat Genet 2016)	TCGA-52-7809-01	Lung Squamous Cell Carcinoma	D25H	OncoKB: NA;CIViC: NA;MyCancerGenome: not present;CancerHotspot: no;3DHotspot: no	MutationAssessor: Error;SIFT: impact: undefined, score: undefined;Polyphen-2: impact: undefined, score: undefined	Missense_Mutation			Somatic	NA	broad.mit.edu	6	26204945	26204945	G	C			29	96		104	213
Bladder Cancer (TCGA, Cell 2017)	TCGA-MV-A51V-01	Bladder Urothelial Carcinoma	D25H	OncoKB: NA;CIViC: NA;MyCancerGenome: not present;CancerHotspot: no;3DHotspot: no	MutationAssessor: Error;SIFT: impact: undefined, score: undefined;Polyphen-2: impact: undefined, score: undefined	Missense_Mutation			Somatic	NaN	broad.mit.edu	6	26204945	26204945	G	C				71			1764
Colon Adenocarcinoma (TCGA, PanCancer Atlas)	TCGA-AA-3811-01	Colon Adenocarcinoma	N26D	OncoKB: NA;CIViC: NA;MyCancerGenome: not present;CancerHotspot: no;3DHotspot: no	MutationAssessor: Error;SIFT: impact: undefined, score: undefined;Polyphen-2: impact: undefined, score: undefined	Missense_Mutation		1	.	.	.	6	26204948	26204948	A	G			9	71		54	1917
Head and Neck Squamous Cell Carcinoma (Broad, Science 2011)	HN_62506	Head and Neck Squamous Cell Carcinoma	N26I	OncoKB: NA;CIViC: NA;MyCancerGenome: not present;CancerHotspot: no;3DHotspot: no	MutationAssessor: Error;SIFT: impact: undefined, score: undefined;Polyphen-2: impact: undefined, score: undefined	Missense_Mutation		1	Unknown	Unknown	broad.mit.edu	6	26204949	26204949	A	T			47	147			319
TCGA data for Esophagus-Stomach Cancers (TCGA, Nature 2017)	TCGA-BR-A452-01	Stomach Adenocarcinoma	I35T	OncoKB: NA;CIViC: NA;MyCancerGenome: not present;CancerHotspot: no;3DHotspot: no	MutationAssessor: Error;SIFT: impact: undefined, score: undefined;Polyphen-2: impact: undefined, score: undefined	Missense_Mutation		1	Somatic	Untested	genome.wustl.edu	6	26204976	26204976	T	C			6	102		141	95
Bladder Cancer (TCGA, Cell 2017)	TCGA-4Z-AA7O-01	Bladder Urothelial Carcinoma	R36W	OncoKB: NA;CIViC: NA;MyCancerGenome: not present;CancerHotspot: no;3DHotspot: no	MutationAssessor: Error;SIFT: impact: undefined, score: undefined;Polyphen-2: impact: undefined, score: undefined	Missense_Mutation			Somatic	NaN	broad.mit.edu	6	26204978	26204978	C	T				38			167
TCGA data for Esophagus-Stomach Cancers (TCGA, Nature 2017)	TCGA-BR-6454-01	Stomach Adenocarcinoma	L38H	OncoKB: NA;CIViC: NA;MyCancerGenome: not present;CancerHotspot: no;3DHotspot: no	MutationAssessor: Error;SIFT: impact: undefined, score: undefined;Polyphen-2: impact: undefined, score: undefined	Missense_Mutation		1	Somatic	Untested	genome.wustl.edu	6	26204985	26204985	T	A			43	71		87	123
Cervical Squamous Cell Carcinoma and Endocervical Adenocarcinoma (TCGA, Provisional)	TCGA-DR-A0ZM-01	Cervical Squamous Cell Carcinoma	L38V	OncoKB: NA;CIViC: NA;MyCancerGenome: not present;CancerHotspot: no;3DHotspot: no	MutationAssessor: Error;SIFT: impact: undefined, score: undefined;Polyphen-2: impact: undefined, score: undefined	Missense_Mutation		1	Somatic	Untested	genome.wustl.edu	6	26204984	26204984	C	G				123		197	1069
TCGA data for Esophagus-Stomach Cancers (TCGA, Nature 2017)	TCGA-JY-A6FG-01	Esophageal Squamous Cell Carcinoma	R40P	OncoKB: NA;CIViC: NA;MyCancerGenome: not present;CancerHotspot: no;3DHotspot: no	MutationAssessor: Error;SIFT: impact: undefined, score: undefined;Polyphen-2: impact: undefined, score: undefined	Missense_Mutation			Somatic	Untested	genome.wustl.edu	6	26204991	26204991	G	C			24	50		94	276
Pan-Lung Cancer (TCGA, Nat Genet 2016)	TCGA-77-A5GA-01	Lung Squamous Cell Carcinoma	G43A	OncoKB: NA;CIViC: NA;MyCancerGenome: not present;CancerHotspot: no;3DHotspot: no	MutationAssessor: Error;SIFT: impact: undefined, score: undefined;Polyphen-2: impact: undefined, score: undefined	Missense_Mutation			Somatic	NA	broad.mit.edu	6	26205000	26205000	G	C			14	133		160	137
Esophageal Squamous Cell Carcinoma (ICGC, Nature 2014)	ESCC-018T	Esophageal Squamous Cell Carcinoma	R46C	OncoKB: NA;CIViC: NA;MyCancerGenome: not present;CancerHotspot: no;3DHotspot: no	MutationAssessor: Error;SIFT: impact: undefined, score: undefined;Polyphen-2: impact: undefined, score: undefined	Missense_Mutation		1	Somatic	NA	BGI	6	26205008	26205008	C	T			13	24		46	30
Colorectal Adenocarcinoma (TCGA, Provisional)	TCGA-AA-3715-01	Colon Adenocarcinoma	L50F	OncoKB: NA;CIViC: NA;MyCancerGenome: not present;CancerHotspot: no;3DHotspot: no	MutationAssessor: Error;SIFT: impact: undefined, score: undefined;Polyphen-2: impact: undefined, score: undefined	Missense_Mutation		1	Somatic	Valid	broad.mit.edu	6	26205020	26205020	C	T							1473
Pan-Lung Cancer (TCGA, Nat Genet 2016)	TCGA-21-1075-01	Lung Squamous Cell Carcinoma	I51V	OncoKB: NA;CIViC: NA;MyCancerGenome: not present;CancerHotspot: no;3DHotspot: no	MutationAssessor: Error;SIFT: impact: undefined, score: undefined;Polyphen-2: impact: undefined, score: undefined	Missense_Mutation			Somatic	NA	broad.mit.edu	6	26205023	26205023	A	G			18	122		201	189
Bladder Cancer (TCGA, Cell 2017)	TCGA-G2-AA3B-01	Bladder Urothelial Carcinoma	E53K	OncoKB: NA;CIViC: NA;MyCancerGenome: not present;CancerHotspot: no;3DHotspot: no	MutationAssessor: Error;SIFT: impact: undefined, score: undefined;Polyphen-2: impact: undefined, score: undefined	Missense_Mutation		2	Somatic	NaN	broad.mit.edu	6	26205029	26205029	G	A				37			675
Head and Neck Squamous Cell Carcinoma (Broad, Science 2011)	HN_63081	Head and Neck Squamous Cell Carcinoma	E54D	OncoKB: NA;CIViC: NA;MyCancerGenome: not present;CancerHotspot: no;3DHotspot: no	MutationAssessor: Error;SIFT: impact: undefined, score: undefined;Polyphen-2: impact: undefined, score: undefined	Missense_Mutation		1	Unknown	Unknown	broad.mit.edu	6	26205034	26205034	G	C			58	82			79
Head and Neck Squamous Cell Carcinoma (TCGA, Provisional)	TCGA-CV-7568-01	Head and Neck Squamous Cell Carcinoma	R56C	OncoKB: NA;CIViC: NA;MyCancerGenome: not present;CancerHotspot: no;3DHotspot: no	MutationAssessor: Error;SIFT: impact: undefined, score: undefined;Polyphen-2: impact: undefined, score: undefined	Missense_Mutation			Somatic	NA	broad.mit.edu	6	26205038	26205038	C	T			34	39			1908
Small Cell Lung Cancer (U Cologne, Nature 2015)	S00938	Small Cell Lung Cancer	R56L	OncoKB: NA;CIViC: NA;MyCancerGenome: not present;CancerHotspot: no;3DHotspot: no	MutationAssessor: Error;SIFT: impact: undefined, score: undefined;Polyphen-2: impact: undefined, score: undefined	Missense_Mutation			NA	NA	ucologne	6	26205039	26205039	G	T							248
Skin Cutaneous Melanoma (Broad, Cell 2012)	MEL-JWCI-14	Cutaneous Melanoma	V58A	OncoKB: NA;CIViC: NA;MyCancerGenome: not present;CancerHotspot: no;3DHotspot: no	MutationAssessor: Error;SIFT: impact: undefined, score: undefined;Polyphen-2: impact: undefined, score: undefined	Missense_Mutation			NA	NA	broad.mit.edu	6	26205045	26205045	T	C							1531
Colorectal Adenocarcinoma (DFCI, Cell Reports 2016)	coadread_dfci_2016_207430	Colorectal Adenocarcinoma	V61A	OncoKB: NA;CIViC: NA;MyCancerGenome: not present;CancerHotspot: no;3DHotspot: no	MutationAssessor: Error;SIFT: impact: undefined, score: undefined;Polyphen-2: impact: undefined, score: undefined	Missense_Mutation			NA	NA	dfci.harvard.edu	6	26205054	26205054	T	C							1440
Head and Neck Squamous Cell Carcinoma (TCGA, Provisional)	TCGA-CV-6938-01	Head and Neck Squamous Cell Carcinoma	V61L	OncoKB: NA;CIViC: NA;MyCancerGenome: not present;CancerHotspot: no;3DHotspot: no	MutationAssessor: Error;SIFT: impact: undefined, score: undefined;Polyphen-2: impact: undefined, score: undefined	Missense_Mutation			Somatic	NA	broad.mit.edu	6	26205053	26205053	G	C			9	87			146
Diffuse Large B-cell Lymphoma (BCGSC, Blood 2013)	NU-DUL-1	Activated B-cell Type	V61L	OncoKB: NA;CIViC: NA;MyCancerGenome: not present;CancerHotspot: no;3DHotspot: no	MutationAssessor: Error;SIFT: impact: undefined, score: undefined;Polyphen-2: impact: undefined, score: undefined	Missense_Mutation			NA	NA	NA	6	26205053	26205053	G	T							418
Oral Squamous Cell Carcinoma (MD Anderson, Cancer Discov 2013)	OSCJM-PT40-169-T	Head and Neck Squamous Cell Carcinoma	F62C	OncoKB: NA;CIViC: NA;MyCancerGenome: not present;CancerHotspot: no;3DHotspot: no	MutationAssessor: Error;SIFT: impact: undefined, score: undefined;Polyphen-2: impact: undefined, score: undefined	Missense_Mutation		1	Somatic	Valid	hgsc.bcm.edu	6	26205057	26205057	T	G							83
Head and Neck Squamous Cell Carcinoma (TCGA, Provisional)	TCGA-CV-7435-01	Head and Neck Squamous Cell Carcinoma	F62C	OncoKB: NA;CIViC: NA;MyCancerGenome: not present;CancerHotspot: no;3DHotspot: no	MutationAssessor: Error;SIFT: impact: undefined, score: undefined;Polyphen-2: impact: undefined, score: undefined	Missense_Mutation		1	Somatic	NA	broad.mit.edu	6	26205057	26205057	T	G			13	88			79
Cervical Squamous Cell Carcinoma and Endocervical Adenocarcinoma (TCGA, Provisional)	TCGA-DG-A2KL-01	Cervical Squamous Cell Carcinoma	E64K	OncoKB: NA;CIViC: NA;MyCancerGenome: not present;CancerHotspot: no;3DHotspot: no	MutationAssessor: Error;SIFT: impact: undefined, score: undefined;Polyphen-2: impact: undefined, score: undefined	Missense_Mutation			Somatic	Untested	genome.wustl.edu	6	26205062	26205062	G	A				78		87	140
Kidney Renal Clear Cell Carcinoma (TCGA, Provisional)	TCGA-A3-3363-01	Renal Clear Cell Carcinoma	V66A	OncoKB: NA;CIViC: NA;MyCancerGenome: not present;CancerHotspot: no;3DHotspot: no	MutationAssessor: Error;SIFT: impact: undefined, score: undefined;Polyphen-2: impact: undefined, score: undefined	Missense_Mutation		1	Somatic	Untested	broad.mit.edu	6	26205069	26205069	T	C							1392
Esophageal Adenocarcinoma (Broad, Nat Genet 2013)	ESO-122	Esophageal Adenocarcinoma	D69F	OncoKB: NA;CIViC: NA;MyCancerGenome: not present;CancerHotspot: no;3DHotspot: no		Missense_Mutation		1	Somatic	NA	broad.mit.edu	6	26205077	26205078	GA	TT				75			216
Multiple Myeloma (Broad, Cancer Cell 2014)	MM-0286	Multiple Myeloma	D69N	OncoKB: NA;CIViC: NA;MyCancerGenome: not present;CancerHotspot: no;3DHotspot: no	MutationAssessor: Error;SIFT: impact: undefined, score: undefined;Polyphen-2: impact: undefined, score: undefined	Missense_Mutation		1	NA	NA	broad.mit.edu	6	26205077	26205077	G	A							85
Liver Hepatocellular Carcinoma (AMC, Hepatology 2014)	H060616	Hepatocellular Adenoma	T72S	OncoKB: NA;CIViC: NA;MyCancerGenome: not present;CancerHotspot: no;3DHotspot: no	MutationAssessor: Error;SIFT: impact: undefined, score: undefined;Polyphen-2: impact: undefined, score: undefined	Missense_Mutation			Somatic	Unknown	LGGM	6	26205087	26205087	C	G				37			87
Diffuse Large B-Cell Lymphoma (Broad, PNAS 2012)	DLBCL-Ls148	Diffuse Large B-Cell Lymphoma	H76Y	OncoKB: NA;CIViC: NA;MyCancerGenome: not present;CancerHotspot: no;3DHotspot: no	MutationAssessor: Error;SIFT: impact: undefined, score: undefined;Polyphen-2: impact: undefined, score: undefined	Missense_Mutation			NA	NA	broad.mit.edu	6	26205098	26205098	C	T							48
Liver Hepatocellular Carcinoma (AMC, Hepatology 2014)	H090284	Hepatocellular Adenoma	A77D	OncoKB: NA;CIViC: NA;MyCancerGenome: not present;CancerHotspot: no;3DHotspot: no	MutationAssessor: Error;SIFT: impact: undefined, score: undefined;Polyphen-2: impact: undefined, score: undefined	Missense_Mutation			Somatic	Unknown	LGGM	6	26205102	26205102	C	A				29			955
Pan-Lung Cancer (TCGA, Nat Genet 2016)	TCGA-NK-A5CT-01	Lung Squamous Cell Carcinoma	A77S	OncoKB: NA;CIViC: NA;MyCancerGenome: not present;CancerHotspot: no;3DHotspot: no	MutationAssessor: Error;SIFT: impact: undefined, score: undefined;Polyphen-2: impact: undefined, score: undefined	Missense_Mutation			Somatic	NA	broad.mit.edu	6	26205101	26205101	G	T			19	90		102	281
Chronic Lymphocytic Leukemia (IUOPA, Nature 2015)	cll_iuopa_2015_1525	Chronic Lymphocytic Leukemia	A77V	OncoKB: NA;CIViC: NA;MyCancerGenome: not present;CancerHotspot: no;3DHotspot: no	MutationAssessor: Error;SIFT: impact: undefined, score: undefined;Polyphen-2: impact: undefined, score: undefined	Missense_Mutation			NA	NA	www.unioviedo.es/IUOPA/	6	26205102	26205102	C	T							7
Ovarian Serous Cystadenocarcinoma (TCGA, Provisional)	TCGA-23-2078-01	Serous Ovarian Cancer	R79H	OncoKB: NA;CIViC: NA;MyCancerGenome: not present;CancerHotspot: no;3DHotspot: no	MutationAssessor: Error;SIFT: impact: undefined, score: undefined;Polyphen-2: impact: undefined, score: undefined	Missense_Mutation		1	Unknown	Unknown	broad.mit.edu	6	26205108	26205108	G	A							93
Colorectal Adenocarcinoma (DFCI, Cell Reports 2016)	coadread_dfci_2016_1212	Colorectal Adenocarcinoma	K80E	OncoKB: NA;CIViC: NA;MyCancerGenome: not present;CancerHotspot: no;3DHotspot: no	MutationAssessor: Error;SIFT: impact: undefined, score: undefined;Polyphen-2: impact: undefined, score: undefined	Missense_Mutation		1	NA	NA	dfci.harvard.edu	6	26205110	26205110	A	G							1556
Breast Invasive Carcinoma (Sanger, Nature 2012)	PD4098a	Invasive Breast Carcinoma	K80N	OncoKB: NA;CIViC: NA;MyCancerGenome: not present;CancerHotspot: no;3DHotspot: no	MutationAssessor: Error;SIFT: impact: undefined, score: undefined;Polyphen-2: impact: undefined, score: undefined	Missense_Mutation		1	Unknown	Unknown	Sanger	6	26205112	26205112	G	C							76
TCGA data for Esophagus-Stomach Cancers (TCGA, Nature 2017)	TCGA-BR-8372-01	Stomach Adenocarcinoma	D86G	OncoKB: NA;CIViC: NA;MyCancerGenome: not present;CancerHotspot: no;3DHotspot: no	MutationAssessor: Error;SIFT: impact: undefined, score: undefined;Polyphen-2: impact: undefined, score: undefined	Missense_Mutation		1	Somatic	Untested	genome.wustl.edu	6	26205129	26205129	A	G			16	59		113	1324
Multiregion Sequencing of Clear Cell Renal Cell Carcinoma (IRC, Nat Genet 2014)	RK26_R10	Renal Clear Cell Carcinoma	A90S	OncoKB: NA;CIViC: NA;MyCancerGenome: not present;CancerHotspot: no;3DHotspot: no	MutationAssessor: Error;SIFT: impact: undefined, score: undefined;Polyphen-2: impact: undefined, score: undefined	Missense_Mutation			NA	NA	www.icr.ac.uk	6	26205140	26205140	G	T				81			17
Multiregion Sequencing of Clear Cell Renal Cell Carcinoma (IRC, Nat Genet 2014)	RK26_R9	Renal Clear Cell Carcinoma	A90S	OncoKB: NA;CIViC: NA;MyCancerGenome: not present;CancerHotspot: no;3DHotspot: no	MutationAssessor: Error;SIFT: impact: undefined, score: undefined;Polyphen-2: impact: undefined, score: undefined	Missense_Mutation			NA	NA	www.icr.ac.uk	6	26205140	26205140	G	T				87			18
Bladder Urothelial Carcinoma (Dana Farber & MSKCC, Cancer Discov 2014)	DFCI-35_R	Bladder Urothelial Carcinoma	K92N	OncoKB: NA;CIViC: NA;MyCancerGenome: not present;CancerHotspot: no;3DHotspot: yes	MutationAssessor: Error;SIFT: impact: undefined, score: undefined;Polyphen-2: impact: undefined, score: undefined	Missense_Mutation		1	NA	NA	NA	6	26205148	26205148	G	C							410
Colorectal Adenocarcinoma (TCGA, Provisional)	TCGA-AA-3685-01	Colon Adenocarcinoma	K92N	OncoKB: NA;CIViC: NA;MyCancerGenome: not present;CancerHotspot: no;3DHotspot: yes	MutationAssessor: Error;SIFT: impact: undefined, score: undefined;Polyphen-2: impact: undefined, score: undefined	Missense_Mutation		1	Somatic	Unknown	broad.mit.edu	6	26205148	26205148	G	C							63
Pan-Lung Cancer (TCGA, Nat Genet 2016)	TCGA-66-2766-01	Lung Squamous Cell Carcinoma	R93T	OncoKB: NA;CIViC: NA;MyCancerGenome: not present;CancerHotspot: no;3DHotspot: yes	MutationAssessor: Error;SIFT: impact: undefined, score: undefined;Polyphen-2: impact: undefined, score: undefined	Missense_Mutation		1	Somatic	NA	broad.mit.edu	6	26205150	26205150	G	C			40	47		65	324
TCGA data for Esophagus-Stomach Cancers (TCGA, Nature 2017)	TCGA-2H-A9GQ-01	Esophagus/Stomach	R93T	OncoKB: NA;CIViC: NA;MyCancerGenome: not present;CancerHotspot: no;3DHotspot: yes	MutationAssessor: Error;SIFT: impact: undefined, score: undefined;Polyphen-2: impact: undefined, score: undefined	Missense_Mutation		1	Somatic	Untested	genome.wustl.edu	6	26205150	26205150	G	C			20	73		69	180
Cervical Squamous Cell Carcinoma and Endocervical Adenocarcinoma (TCGA, Provisional)	TCGA-FU-A5XV-01	Cervical Squamous Cell Carcinoma	R93T	OncoKB: NA;CIViC: NA;MyCancerGenome: not present;CancerHotspot: no;3DHotspot: yes	MutationAssessor: Error;SIFT: impact: undefined, score: undefined;Polyphen-2: impact: undefined, score: undefined	Missense_Mutation		1	Somatic	Untested	genome.wustl.edu	6	26205150	26205150	G	C				68		52	87
Head and Neck Squamous Cell Carcinoma (TCGA, Provisional)	TCGA-CV-7411-01	Head and Neck Squamous Cell Carcinoma	R93T	OncoKB: NA;CIViC: NA;MyCancerGenome: not present;CancerHotspot: no;3DHotspot: yes	MutationAssessor: Error;SIFT: impact: undefined, score: undefined;Polyphen-2: impact: undefined, score: undefined	Missense_Mutation		1	Somatic	NA	broad.mit.edu	6	26205150	26205150	G	C			6	43			106
Head and Neck Squamous Cell Carcinoma (TCGA, Provisional)	TCGA-CV-6937-01	Head and Neck Squamous Cell Carcinoma	G95E	OncoKB: NA;CIViC: NA;MyCancerGenome: not present;CancerHotspot: no;3DHotspot: yes	MutationAssessor: Error;SIFT: impact: undefined, score: undefined;Polyphen-2: impact: undefined, score: undefined	Missense_Mutation			Somatic	NA	broad.mit.edu	6	26205156	26205156	G	A			16	60			117
Skin Cutaneous Melanoma (TCGA, Provisional)	TCGA-EE-A29T-06	Cutaneous Melanoma	G95E	OncoKB: NA;CIViC: NA;MyCancerGenome: not present;CancerHotspot: no;3DHotspot: yes	MutationAssessor: Error;SIFT: impact: undefined, score: undefined;Polyphen-2: impact: undefined, score: undefined	Missense_Mutation			Somatic	NA	broad.mit.edu	6	26205156	26205156	G	A			14	71			326
Skin Cutaneous Melanoma (Broad, Cell 2012)	ME032	Cutaneous Melanoma	G95R	OncoKB: NA;CIViC: NA;MyCancerGenome: not present;CancerHotspot: no;3DHotspot: yes	MutationAssessor: Error;SIFT: impact: undefined, score: undefined;Polyphen-2: impact: undefined, score: undefined	Missense_Mutation			NA	NA	broad.mit.edu	6	26205155	26205155	G	A							581
Diffuse Large B-cell Lymphoma (BCGSC, Blood 2013)	OCI-Ly7	Germinal Center B-Cell Type	R96L	OncoKB: NA;CIViC: NA;MyCancerGenome: not present;CancerHotspot: no;3DHotspot: no	MutationAssessor: Error;SIFT: impact: undefined, score: undefined;Polyphen-2: impact: undefined, score: undefined	Missense_Mutation			NA	NA	NA	6	26205159	26205159	G	T							352
Metastatic Prostate Cancer, SU2C/PCF Dream Team (Robinson et al., Cell 2015)	SC_9037	Prostate Adenocarcinoma	T97N	OncoKB: NA;CIViC: NA;MyCancerGenome: not present;CancerHotspot: no;3DHotspot: no	MutationAssessor: Error;SIFT: impact: undefined, score: undefined;Polyphen-2: impact: undefined, score: undefined	Missense_Mutation		1	NA	NA	NA	6	26205162	26205162	C	A				595			61
Prostate Adenocarcinoma (TCGA, Provisional)	TCGA-ZG-A9LY-01	Prostate Adenocarcinoma	L98F	OncoKB: NA;CIViC: NA;MyCancerGenome: not present;CancerHotspot: no;3DHotspot: no	MutationAssessor: Error;SIFT: impact: undefined, score: undefined;Polyphen-2: impact: undefined, score: undefined	Missense_Mutation			Somatic	NA	broad.mit.edu	6	26205164	26205164	C	T			12	28			40
Cervical Squamous Cell Carcinoma and Endocervical Adenocarcinoma (TCGA, Provisional)	TCGA-C5-A1BN-01	Cervical Squamous Cell Carcinoma	L98V	OncoKB: NA;CIViC: NA;MyCancerGenome: not present;CancerHotspot: no;3DHotspot: no	MutationAssessor: Error;SIFT: impact: undefined, score: undefined;Polyphen-2: impact: undefined, score: undefined	Missense_Mutation			Somatic	Untested	genome.wustl.edu	6	26205164	26205164	C	G				13		43	70
Pan-Lung Cancer (TCGA, Nat Genet 2016)	TCGA-78-8662-01	Lung Adenocarcinoma	F101L	OncoKB: NA;CIViC: NA;MyCancerGenome: not present;CancerHotspot: no;3DHotspot: no	MutationAssessor: Error;SIFT: impact: undefined, score: undefined;Polyphen-2: impact: undefined, score: undefined	Missense_Mutation			Somatic	NA	broad.mit.edu	6	26205175	26205175	C	A			38	48		97	981
Breast Invasive Carcinoma (TCGA, PanCancer Atlas)	TCGA-A7-A5ZW-01	Breast Invasive Ductal Carcinoma	G10A	OncoKB: NA;CIViC: NA;MyCancerGenome: not present;CancerHotspot: no;3DHotspot: no	MutationAssessor: Error;SIFT: impact: undefined, score: undefined;Polyphen-2: impact: undefined, score: undefined	Missense_Mutation	diploid	1	.	.	.	6	26204901	26204901	G	C	0.07		4	53		40	28	2019-01-01	ENST00000360441.4:c.29G>C
MSS Mixed Solid Tumors (Broad/Dana-Farber, Nat Genet 2018)	MEL-IPI_Pat151-Tumor-SM-7A15A	Cutaneous Melanoma	G14E	OncoKB: NA;CIViC: NA;MyCancerGenome: not present;CancerHotspot: no;3DHotspot: no	MutationAssessor: Error;SIFT: impact: undefined, score: undefined;Polyphen-2: impact: undefined, score: undefined	Missense_Mutation			NA	NA	NA	6	26204913	26204913	G	A	0.02		9	428			2581	2019-01-01	ENST00000360441.4:c.41G>A
Metastatic Prostate Adenocarcinoma (SU2C/PCF Dream Team, PNAS 2019)	PRAD-6115605.0-Tumor-SM-B2XSA	Prostate Adenocarcinoma	R18L	OncoKB: NA;CIViC: NA;MyCancerGenome: not present;CancerHotspot: no;3DHotspot: no	MutationAssessor: Error;SIFT: impact: undefined, score: undefined;Polyphen-2: impact: undefined, score: undefined	Missense_Mutation	shallowdel		Somatic	Untested	broad.mit.edu	6	26204925	26204925	G	T	0.03		4	113			60	2019-01-01	ENST00000360441.4:c.53G>T
Uterine Corpus Endometrial Carcinoma (TCGA, PanCancer Atlas)	TCGA-E6-A1LX-01	Uterine Endometrioid Carcinoma	I30M	OncoKB: NA;CIViC: NA;MyCancerGenome: not present;CancerHotspot: no;3DHotspot: no	MutationAssessor: Error;SIFT: impact: undefined, score: undefined;Polyphen-2: impact: undefined, score: undefined	Missense_Mutation	diploid		.	.	.	6	26204962	26204962	T	G	0.14		6	38		45	12696	2019-01-01	ENST00000360441.4:c.90T>G
Skin Cutaneous Melanoma (TCGA, PanCancer Atlas)	TCGA-W3-AA1O-06	Cutaneous Melanoma	R37H	OncoKB: NA;CIViC: NA;MyCancerGenome: not present;CancerHotspot: no;3DHotspot: no	MutationAssessor: Error;SIFT: impact: undefined, score: undefined;Polyphen-2: impact: undefined, score: undefined	Missense_Mutation	diploid		.	.	.	6	26204982	26204982	G	A	0.28		19	48		78	627	2019-01-01	ENST00000360441.4:c.110G>A
Uterine Corpus Endometrial Carcinoma (TCGA, PanCancer Atlas)	TCGA-FI-A2D5-01	Uterine Endometrioid Carcinoma	I47M	OncoKB: NA;CIViC: NA;MyCancerGenome: not present;CancerHotspot: no;3DHotspot: no	MutationAssessor: Error;SIFT: impact: undefined, score: undefined;Polyphen-2: impact: undefined, score: undefined	Missense_Mutation	diploid		.	.	.	6	26205013	26205013	T	G	0.09		10	103		69	13874	2019-01-01	ENST00000360441.4:c.141T>G
Cervical Squamous Cell Carcinoma (TCGA, PanCancer Atlas)	TCGA-ZJ-A8QR-01	Cervical Squamous Cell Carcinoma	I51M	OncoKB: NA;CIViC: NA;MyCancerGenome: not present;CancerHotspot: no;3DHotspot: no	MutationAssessor: Error;SIFT: impact: undefined, score: undefined;Polyphen-2: impact: undefined, score: undefined	Missense_Mutation	diploid		.	.	.	6	26205025	26205025	C	G	0.33		23	47		69	123	2019-01-01	ENST00000360441.4:c.153C>G
MSS Mixed Solid Tumors (Broad/Dana-Farber, Nat Genet 2018)	MEL-IPI_Pat111-Tumor-SM-4CU6Y	Cutaneous Melanoma	D69N	OncoKB: NA;CIViC: NA;MyCancerGenome: not present;CancerHotspot: no;3DHotspot: no	MutationAssessor: Error;SIFT: impact: undefined, score: undefined;Polyphen-2: impact: undefined, score: undefined	Missense_Mutation		1	NA	NA	NA	6	26205077	26205077	G	A	0.24		62	198			1381	2019-01-01	ENST00000360441.4:c.205G>A
Uterine Corpus Endometrial Carcinoma (TCGA, PanCancer Atlas)	TCGA-B5-A1MX-01	Uterine Endometrioid Carcinoma	T72I	OncoKB: NA;CIViC: NA;MyCancerGenome: not present;CancerHotspot: no;3DHotspot: no	MutationAssessor: Error;SIFT: impact: undefined, score: undefined;Polyphen-2: impact: undefined, score: undefined	Missense_Mutation	diploid		.	.	.	6	26205087	26205087	C	T	0.48		25	27		82	5699	2019-01-01	ENST00000360441.4:c.215C>T
Breast Invasive Carcinoma (TCGA, PanCancer Atlas)	TCGA-BH-A0H7-01	Breast Invasive Ductal Carcinoma	T74M	OncoKB: NA;CIViC: NA;MyCancerGenome: not present;CancerHotspot: no;3DHotspot: no	MutationAssessor: Error;SIFT: impact: undefined, score: undefined;Polyphen-2: impact: undefined, score: undefined	Missense_Mutation	gain		.	.	.	6	26205093	26205093	C	T	0.04		10	235		131	53	2019-01-01	ENST00000360441.4:c.221C>T
Uterine Corpus Endometrial Carcinoma (TCGA, PanCancer Atlas)	TCGA-DI-A1BU-01	Uterine Mixed Endometrial Carcinoma	T81A	OncoKB: NA;CIViC: NA;MyCancerGenome: not present;CancerHotspot: no;3DHotspot: no	MutationAssessor: Error;SIFT: impact: undefined, score: undefined;Polyphen-2: impact: undefined, score: undefined	Missense_Mutation	diploid		.	.	.	6	26205113	26205113	A	G	0.13		16	104		64	7644	2019-01-01	ENST00000360441.4:c.241A>G
Metastatic Prostate Adenocarcinoma (SU2C/PCF Dream Team, PNAS 2019)	PRAD-6115427.0-Tumor-SM-B2XRT	Prostate Adenocarcinoma	L91M	OncoKB: NA;CIViC: NA;MyCancerGenome: not present;CancerHotspot: no;3DHotspot: no	MutationAssessor: Error;SIFT: impact: undefined, score: undefined;Polyphen-2: impact: undefined, score: undefined	Missense_Mutation	shallowdel		Somatic	Untested	broad.mit.edu	6	26205143	26205143	C	A	0.83		85	18			177	2019-01-01	ENST00000360441.4:c.271C>A
Ovarian Serous Cystadenocarcinoma (TCGA, PanCancer Atlas)	TCGA-20-0991-01	Serous Ovarian Cancer	K92N	OncoKB: NA;CIViC: NA;MyCancerGenome: not present;CancerHotspot: no;3DHotspot: yes	MutationAssessor: Error;SIFT: impact: undefined, score: undefined;Polyphen-2: impact: undefined, score: undefined	Missense_Mutation	gain	1	.	.	.	6	26205148	26205148	G	C	0.12		21	148		205	207	2019-01-01	ENST00000360441.4:c.276G>C

## Sheet: HIST1H4F
Study	Sample ID	Cancer Type	Protein Change	Annotation	Functional Impact	Mutation Type	Copy #	COSMIC	MS	VS	Center	Chromosome	Start Pos	End Pos	Ref	Var	Allele Freq (T)	Allele Freq (N)	Variant Reads	Ref Reads	Variant Reads (N)	Ref Reads (N)	# Mut in Sample
Pan-Lung Cancer (TCGA, Nat Genet 2016)	TCGA-73-A9RS-01	Lung Adenocarcinoma	G3V	OncoKB: NA;CIViC: NA;MyCancerGenome: not present;CancerHotspot: no;3DHotspot: no	MutationAssessor: Error;SIFT: impact: tolerated_low_confidence, score: 0.05;Polyphen-2: impact: probably_damaging, score: 0.954	Missense_Mutation			Somatic	NA	broad.mit.edu	6	26240661	26240661	G	T			8	17		29	816
Head and Neck Squamous Cell Carcinoma (Broad, Science 2011)	HN_62421	Head and Neck Squamous Cell Carcinoma	R4K	OncoKB: NA;CIViC: NA;MyCancerGenome: not present;CancerHotspot: no;3DHotspot: no	MutationAssessor: Error;SIFT: impact: tolerated_low_confidence, score: 0.1;Polyphen-2: impact: benign, score: 0.028	Missense_Mutation		1	Unknown	Unknown	broad.mit.edu	6	26240664	26240664	G	A			8	48			452
Head and Neck Squamous Cell Carcinoma (TCGA, Provisional)	TCGA-F7-A624-01	Head and Neck Squamous Cell Carcinoma	G7C	OncoKB: NA;CIViC: NA;MyCancerGenome: not present;CancerHotspot: no;3DHotspot: no	MutationAssessor: Error;SIFT: impact: deleterious_low_confidence, score: 0.01;Polyphen-2: impact: unknown, score: 0	Missense_Mutation			Somatic	NA	broad.mit.edu	6	26240672	26240672	G	T			5	52			3181
Small Cell Lung Cancer (U Cologne, Nature 2015)	S02292	Small Cell Lung Cancer	G8V	OncoKB: NA;CIViC: NA;MyCancerGenome: not present;CancerHotspot: no;3DHotspot: no	MutationAssessor: Error;SIFT: impact: deleterious_low_confidence, score: 0.01;Polyphen-2: impact: probably_damaging, score: 0.954	Missense_Mutation			NA	NA	ucologne	6	26240676	26240676	G	T							656
Small Cell Lung Cancer (U Cologne, Nature 2015)	S02376	Small Cell Lung Cancer	G10C	OncoKB: NA;CIViC: NA;MyCancerGenome: not present;CancerHotspot: no;3DHotspot: no	MutationAssessor: Error;SIFT: impact: deleterious_low_confidence, score: 0;Polyphen-2: impact: probably_damaging, score: 0.974	Missense_Mutation			NA	NA	ucologne	6	26240681	26240681	G	T							382
Lymphoid Neoplasm Diffuse Large B-cell Lymphoma (TCGA, Provisional)	TCGA-FF-8047-01	Diffuse Large B-Cell Lymphoma	G15S	OncoKB: NA;CIViC: NA;MyCancerGenome: not present;CancerHotspot: no;3DHotspot: no	MutationAssessor: Error;SIFT: impact: tolerated_low_confidence, score: 0.07;Polyphen-2: impact: unknown, score: 0	Missense_Mutation			Somatic	Untested	hgsc.bcm.edu	6	26240696	26240696	G	A			37	43		66	105
Colon Adenocarcinoma (TCGA, PanCancer Atlas)	TCGA-D5-6540-01	Mucinous Adenocarcinoma of the Colon and Rectum	R18C	OncoKB: NA;CIViC: NA;MyCancerGenome: not present;CancerHotspot: no;3DHotspot: no	MutationAssessor: Error;SIFT: impact: tolerated, score: 0.08;Polyphen-2: impact: unknown, score: 0	Missense_Mutation			.	.	.	6	26240705	26240705	C	T			24	38	1	82	1191
NCI-60 Cell Lines (NCI, Cancer Res. 2012)	HCT_15	Colorectal Adenocarcinoma	R20H	OncoKB: NA;CIViC: NA;MyCancerGenome: not present;CancerHotspot: no;3DHotspot: no	MutationAssessor: Error;SIFT: impact: tolerated, score: 0.12;Polyphen-2: impact: benign, score: 0.306	Missense_Mutation			NA	NA	discover.nci.nih.gov	6	26240712	26240712	G	A							5093
Cervical Squamous Cell Carcinoma and Endocervical Adenocarcinoma (TCGA, Provisional)	TCGA-JW-A5VL-01	Cervical Squamous Cell Carcinoma	D25H	OncoKB: NA;CIViC: NA;MyCancerGenome: not present;CancerHotspot: no;3DHotspot: no	MutationAssessor: Error;SIFT: impact: deleterious_low_confidence, score: 0;Polyphen-2: impact: possibly_damaging, score: 0.584	Missense_Mutation			Somatic	Untested	genome.wustl.edu	6	26240726	26240726	G	C				29		33	1809
Skin Cutaneous Melanoma (TCGA, Provisional)	TCGA-FW-A3R5-06	Cutaneous Melanoma	G29S	OncoKB: NA;CIViC: NA;MyCancerGenome: not present;CancerHotspot: no;3DHotspot: no	MutationAssessor: Error;SIFT: impact: deleterious, score: 0.01;Polyphen-2: impact: possibly_damaging, score: 0.871	Missense_Mutation		1	Somatic	NA	broad.mit.edu	6	26240738	26240738	G	A			9	34			15944
Esophageal Squamous Cell Carcinoma (ICGC, Nature 2014)	ESCC-178T	Esophageal Squamous Cell Carcinoma	I30M	OncoKB: NA;CIViC: NA;MyCancerGenome: not present;CancerHotspot: no;3DHotspot: no	MutationAssessor: Error;SIFT: impact: deleterious, score: 0;Polyphen-2: impact: probably_damaging, score: 0.991	Missense_Mutation		1	Somatic	NA	BGI	6	26240743	26240743	C	G			13	54		105	92
Colorectal Adenocarcinoma (DFCI, Cell Reports 2016)	coadread_dfci_2016_3724	Colorectal Adenocarcinoma	T31M	OncoKB: NA;CIViC: NA;MyCancerGenome: not present;CancerHotspot: no;3DHotspot: no	MutationAssessor: Error;SIFT: impact: deleterious, score: 0.01;Polyphen-2: impact: probably_damaging, score: 0.964	Missense_Mutation			NA	NA	dfci.harvard.edu	6	26240745	26240745	C	T							1887
Ampullary Carcinoma (Baylor College of Medicine, Cell Reports 2016)	AMPAC_3731	Ampullary Carcinoma	R36C	OncoKB: NA;CIViC: NA;MyCancerGenome: not present;CancerHotspot: no;3DHotspot: no	MutationAssessor: Error;SIFT: impact: tolerated, score: 0.05;Polyphen-2: impact: possibly_damaging, score: 0.82	Missense_Mutation		1	Somatic	Untested	Baylor College of Medicine	6	26240759	26240759	C	T			25	63		381	116
TCGA data for Esophagus-Stomach Cancers (TCGA, Nature 2017)	TCGA-HU-A4GX-01	Stomach Adenocarcinoma	R36C	OncoKB: NA;CIViC: NA;MyCancerGenome: not present;CancerHotspot: no;3DHotspot: no	MutationAssessor: Error;SIFT: impact: tolerated, score: 0.05;Polyphen-2: impact: possibly_damaging, score: 0.82	Missense_Mutation		1	Somatic	Untested	genome.wustl.edu	6	26240759	26240759	C	T			16	45		69	1285
Skin Cutaneous Melanoma(Broad, Cancer Discov 2014)	Pat_31_Post	Melanoma	R37C	OncoKB: NA;CIViC: NA;MyCancerGenome: not present;CancerHotspot: no;3DHotspot: no	MutationAssessor: Error;SIFT: impact: deleterious, score: 0.05;Polyphen-2: impact: possibly_damaging, score: 0.83	Missense_Mutation			NA	NA	broad.mit.edu	6	26240762	26240762	C	T			3	62			354
Bladder Cancer (TCGA, Cell 2017)	TCGA-K4-A54R-01	Bladder Urothelial Carcinoma	R40Q	OncoKB: NA;CIViC: NA;MyCancerGenome: not present;CancerHotspot: no;3DHotspot: no	MutationAssessor: Error;SIFT: impact: deleterious, score: 0.04;Polyphen-2: impact: possibly_damaging, score: 0.818	Missense_Mutation			Somatic	NaN	broad.mit.edu	6	26240772	26240772	G	A				32			811
Hepatocellular Carcinomas (Inserm, Nat Genet 2015)	CHC892T	Hepatocellular Carcinoma	G49D	OncoKB: NA;CIViC: NA;MyCancerGenome: not present;CancerHotspot: no;3DHotspot: no	MutationAssessor: Error;SIFT: impact: deleterious, score: 0.01;Polyphen-2: impact: probably_damaging, score: 0.951	Missense_Mutation			NA	NA	inserm.fr	6	26240799	26240799	G	A							4025
Colorectal Adenocarcinoma (TCGA, Provisional)	TCGA-AA-3715-01	Colon Adenocarcinoma	G57D	OncoKB: NA;CIViC: NA;MyCancerGenome: not present;CancerHotspot: no;3DHotspot: no	MutationAssessor: Error;SIFT: impact: tolerated, score: 0.05;Polyphen-2: impact: benign, score: 0.058	Missense_Mutation		1	Somatic	Valid	broad.mit.edu	6	26240823	26240823	G	A							1473
Lymphoid Neoplasm Diffuse Large B-cell Lymphoma (TCGA, Provisional)	TCGA-FA-A6HN-01	Diffuse Large B-Cell Lymphoma	G57D	OncoKB: NA;CIViC: NA;MyCancerGenome: not present;CancerHotspot: no;3DHotspot: no	MutationAssessor: Error;SIFT: impact: tolerated, score: 0.05;Polyphen-2: impact: benign, score: 0.058	Missense_Mutation		1	Somatic	Untested	hgsc.bcm.edu	6	26240823	26240823	G	A			15	88		128	149
Skin Cutaneous Melanoma (TCGA, Provisional)	TCGA-EE-A29D-06	Cutaneous Melanoma	L59F	OncoKB: NA;CIViC: NA;MyCancerGenome: not present;CancerHotspot: no;3DHotspot: no	MutationAssessor: Error;SIFT: impact: deleterious, score: 0.02;Polyphen-2: impact: benign, score: 0.403	Missense_Mutation		1	Somatic	NA	broad.mit.edu	6	26240828	26240828	C	T			12	25			3065
Head and Neck Squamous Cell Carcinoma (TCGA, Provisional)	TCGA-P3-A5Q5-01	Head and Neck Squamous Cell Carcinoma	E64D	OncoKB: NA;CIViC: NA;MyCancerGenome: not present;CancerHotspot: no;3DHotspot: no	MutationAssessor: Error;SIFT: impact: deleterious, score: 0.03;Polyphen-2: impact: benign, score: 0.172	Missense_Mutation			Somatic	NA	broad.mit.edu	6	26240845	26240845	G	C			14	49			255
Colon Adenocarcinoma (TCGA, PanCancer Atlas)	TCGA-AA-A00N-01	Mucinous Adenocarcinoma of the Colon and Rectum	R68W	OncoKB: NA;CIViC: NA;MyCancerGenome: not present;CancerHotspot: no;3DHotspot: no	MutationAssessor: Error;SIFT: impact: tolerated, score: 0.05;Polyphen-2: impact: benign, score: 0.119	Missense_Mutation			.	.	.	6	26240855	26240855	C	T			15	192		107	4872
Head and Neck Squamous Cell Carcinoma (TCGA, Provisional)	TCGA-CR-7367-01	Head and Neck Squamous Cell Carcinoma	D69Y	OncoKB: NA;CIViC: NA;MyCancerGenome: not present;CancerHotspot: no;3DHotspot: no	MutationAssessor: Error;SIFT: impact: deleterious, score: 0.01;Polyphen-2: impact: possibly_damaging, score: 0.861	Missense_Mutation			Somatic	NA	broad.mit.edu	6	26240858	26240858	G	T			31	27			159
Cervical Squamous Cell Carcinoma and Endocervical Adenocarcinoma (TCGA, Provisional)	TCGA-DR-A0ZM-01	Cervical Squamous Cell Carcinoma	V71I	OncoKB: NA;CIViC: NA;MyCancerGenome: not present;CancerHotspot: no;3DHotspot: no	MutationAssessor: Error;SIFT: impact: tolerated, score: 0.13;Polyphen-2: impact: benign, score: 0.183	Missense_Mutation		1	Somatic	Untested	genome.wustl.edu	6	26240864	26240864	G	A				87		99	1069
Colorectal Adenocarcinoma (DFCI, Cell Reports 2016)	coadread_dfci_2016_164668	Colorectal Adenocarcinoma	V71I	OncoKB: NA;CIViC: NA;MyCancerGenome: not present;CancerHotspot: no;3DHotspot: no	MutationAssessor: Error;SIFT: impact: tolerated, score: 0.13;Polyphen-2: impact: benign, score: 0.183	Missense_Mutation		1	NA	NA	dfci.harvard.edu	6	26240864	26240864	G	A							190
Skin Cutaneous Melanoma (TCGA, Provisional)	TCGA-DA-A1I1-06	Cutaneous Melanoma	E75K	OncoKB: NA;CIViC: NA;MyCancerGenome: not present;CancerHotspot: no;3DHotspot: no	MutationAssessor: Error;SIFT: impact: deleterious, score: 0.05;Polyphen-2: impact: possibly_damaging, score: 0.553	Missense_Mutation		1	Somatic	NA	broad.mit.edu	6	26240876	26240876	G	A			10	26			332
Small Cell Lung Cancer (U Cologne, Nature 2015)	S02355	Small Cell Lung Cancer	R79G	OncoKB: NA;CIViC: NA;MyCancerGenome: not present;CancerHotspot: no;3DHotspot: no	MutationAssessor: Error;SIFT: impact: deleterious, score: 0;Polyphen-2: impact: probably_damaging, score: 0.913	Missense_Mutation			NA	NA	ucologne	6	26240888	26240888	C	G							87
Testicular Germ Cell Cancer (TCGA, Provisional)	TCGA-W4-A7U3-01	Non-Seminomatous Germ Cell Tumor	A84G	OncoKB: NA;CIViC: NA;MyCancerGenome: not present;CancerHotspot: no;3DHotspot: no	MutationAssessor: Error;SIFT: impact: deleterious, score: 0.03;Polyphen-2: impact: benign, score: 0.042	Missense_Mutation			Somatic	Untested	hgsc.bcm.edu;broad.mit.edu;ucsc.edu;bcgsc.ca;mdanderson.org	6	26240904	26240904	C	G							57
Head and Neck Squamous Cell Carcinoma (TCGA, Provisional)	TCGA-CN-5356-01	Head and Neck Squamous Cell Carcinoma	R93C	OncoKB: NA;CIViC: NA;MyCancerGenome: not present;CancerHotspot: no;3DHotspot: no	MutationAssessor: Error;SIFT: impact: deleterious, score: 0.04;Polyphen-2: impact: possibly_damaging, score: 0.823	Missense_Mutation		1	Somatic	NA	broad.mit.edu	6	26240930	26240930	C	T			7	131			341
Uterine Corpus Endometrial Carcinoma (TCGA, Provisional)	TCGA-BS-A0UF-01	Uterine Endometrioid Carcinoma	R93C	OncoKB: NA;CIViC: NA;MyCancerGenome: not present;CancerHotspot: no;3DHotspot: no	MutationAssessor: Error;SIFT: impact: deleterious, score: 0.04;Polyphen-2: impact: possibly_damaging, score: 0.823	Missense_Mutation		1	Somatic	Untested	genome.wustl.edu	6	26240930	26240930	C	T			13	69		70	7404
Pan-Lung Cancer (TCGA, Nat Genet 2016)	TCGA-52-7812-01	Lung Squamous Cell Carcinoma	Q94H	OncoKB: NA;CIViC: NA;MyCancerGenome: not present;CancerHotspot: no;3DHotspot: no	MutationAssessor: Error;SIFT: impact: deleterious, score: 0.03;Polyphen-2: impact: benign, score: 0.071	Missense_Mutation			Somatic	NA	broad.mit.edu	6	26240935	26240935	G	T			18	45		65	237
Pan-Lung Cancer (TCGA, Nat Genet 2016)	TCGA-55-A491-01	Lung Adenocarcinoma	G95V	OncoKB: NA;CIViC: NA;MyCancerGenome: not present;CancerHotspot: no;3DHotspot: no	MutationAssessor: Error;SIFT: impact: deleterious, score: 0;Polyphen-2: impact: probably_damaging, score: 0.919	Missense_Mutation			Somatic	NA	broad.mit.edu	6	26240937	26240937	G	T			17	31		87	325
Uterine Corpus Endometrial Carcinoma (TCGA, Provisional)	TCGA-BG-A18B-01	Uterine Endometrioid Carcinoma	R96C	OncoKB: NA;CIViC: NA;MyCancerGenome: not present;CancerHotspot: no;3DHotspot: no	MutationAssessor: Error;SIFT: impact: tolerated, score: 0.06;Polyphen-2: impact: probably_damaging, score: 0.964	Missense_Mutation		1	Somatic	Untested	genome.wustl.edu	6	26240939	26240939	C	T			38	58		99	263
Skin Cutaneous Melanoma(Broad, Cancer Discov 2014)	Pat_28_Post	Melanoma	R96H	OncoKB: NA;CIViC: NA;MyCancerGenome: not present;CancerHotspot: no;3DHotspot: no	MutationAssessor: Error;SIFT: impact: tolerated, score: 0.07;Polyphen-2: impact: probably_damaging, score: 0.923	Missense_Mutation		1	NA	NA	broad.mit.edu	6	26240940	26240940	G	A			44	129			906
TCGA data for Esophagus-Stomach Cancers (TCGA, Nature 2017)	TCGA-BR-4257-01	Stomach Adenocarcinoma	T97A	OncoKB: NA;CIViC: NA;MyCancerGenome: not present;CancerHotspot: no;3DHotspot: no	MutationAssessor: Error;SIFT: impact: deleterious, score: 0.01;Polyphen-2: impact: benign, score: 0.182	Missense_Mutation			Somatic	Untested	genome.wustl.edu	6	26240942	26240942	A	G			14	44		74	1040
Chronic Lymphocytic Leukemia (Broad, Cell 2013)	CLL070	Chronic Lymphocytic Leukemia	G100D	OncoKB: NA;CIViC: NA;MyCancerGenome: not present;CancerHotspot: no;3DHotspot: no	MutationAssessor: Error;SIFT: impact: deleterious_low_confidence, score: 0.04;Polyphen-2: impact: probably_damaging, score: 0.963	Missense_Mutation		1	Somatic	NA	broad.mit.edu	6	26240952	26240952	G	A							12
Breast Invasive Carcinoma (TCGA, PanCancer Atlas)	TCGA-LD-A74U-01	Breast Invasive Carcinoma (NOS)	R4K	OncoKB: NA;CIViC: NA;MyCancerGenome: not present;CancerHotspot: no;3DHotspot: no	MutationAssessor: Error;SIFT: impact: tolerated_low_confidence, score: 0.1;Polyphen-2: impact: benign, score: 0.028	Missense_Mutation	diploid	1	.	.	.	6	26240664	26240664	G	A	0.13		6	42		29	194	2019-01-01	ENST00000377745.2:c.11G>A
Uterine Corpus Endometrial Carcinoma (TCGA, PanCancer Atlas)	TCGA-DI-A1BU-01	Uterine Mixed Endometrial Carcinoma	K6N	OncoKB: NA;CIViC: NA;MyCancerGenome: not present;CancerHotspot: no;3DHotspot: no	MutationAssessor: Error;SIFT: impact: deleterious_low_confidence, score: 0.04;Polyphen-2: impact: benign, score: 0.378	Missense_Mutation	diploid		.	.	.	6	26240671	26240671	A	T	0.3		15	35		25	7644	2019-01-01	ENST00000377745.2:c.18A>T
Uterine Corpus Endometrial Carcinoma (TCGA, PanCancer Atlas)	TCGA-AJ-A3EK-01	Uterine Endometrioid Carcinoma	R18C	OncoKB: NA;CIViC: NA;MyCancerGenome: not present;CancerHotspot: no;3DHotspot: no	MutationAssessor: Error;SIFT: impact: tolerated, score: 0.08;Polyphen-2: impact: unknown, score: 0	Missense_Mutation	diploid		.	.	.	6	26240705	26240705	C	T	0.27		10	27		17	5736	2019-01-01	ENST00000377745.2:c.52C>T
Lung Squamous Cell Carcinoma (TCGA, PanCancer Atlas)	TCGA-21-1080-01	Lung Squamous Cell Carcinoma	A34T	OncoKB: NA;CIViC: NA;MyCancerGenome: not present;CancerHotspot: no;3DHotspot: no	MutationAssessor: Error;SIFT: impact: tolerated, score: 0.06;Polyphen-2: impact: possibly_damaging, score: 0.575	Missense_Mutation	diploid		.	.	.	6	26240753	26240753	G	A	0.14		4	25		44	913	2019-01-01	ENST00000377745.2:c.100G>A
Uterine Corpus Endometrial Carcinoma (TCGA, PanCancer Atlas)	TCGA-SL-A6JA-01	Uterine Endometrioid Carcinoma	R46H	OncoKB: NA;CIViC: NA;MyCancerGenome: not present;CancerHotspot: no;3DHotspot: no	MutationAssessor: Error;SIFT: impact: tolerated_low_confidence, score: 0.06;Polyphen-2: impact: benign, score: 0.338	Missense_Mutation	diploid	1	.	.	.	6	26240790	26240790	G	A	0.31		5	11		17	746	2019-01-01	ENST00000377745.2:c.137G>A
Breast Invasive Carcinoma (TCGA, PanCancer Atlas)	TCGA-GM-A2DN-01	Breast Invasive Ductal Carcinoma	G49A	OncoKB: NA;CIViC: NA;MyCancerGenome: not present;CancerHotspot: no;3DHotspot: no	MutationAssessor: Error;SIFT: impact: tolerated, score: 0.1;Polyphen-2: impact: benign, score: 0.167	Missense_Mutation	diploid		.	.	.	6	26240799	26240799	G	C	0.09		5	53		70	24	2019-01-01	ENST00000377745.2:c.146G>C
Uterine Corpus Endometrial Carcinoma (TCGA, PanCancer Atlas)	TCGA-AX-A2HD-01	Uterine Endometrioid Carcinoma	R56C	OncoKB: NA;CIViC: NA;MyCancerGenome: not present;CancerHotspot: no;3DHotspot: no	MutationAssessor: Error;SIFT: impact: deleterious, score: 0.04;Polyphen-2: impact: possibly_damaging, score: 0.863	Missense_Mutation	diploid		.	.	.	6	26240819	26240819	C	T	0.32		18	38		52	7854	2019-01-01	ENST00000377745.2:c.166C>T
Uterine Corpus Endometrial Carcinoma (TCGA, PanCancer Atlas)	TCGA-A5-A0G2-01	Uterine Serous Carcinoma/Uterine Papillary Serous Carcinoma	R68W	OncoKB: NA;CIViC: NA;MyCancerGenome: not present;CancerHotspot: no;3DHotspot: no	MutationAssessor: Error;SIFT: impact: tolerated, score: 0.05;Polyphen-2: impact: benign, score: 0.119	Missense_Mutation	diploid		.	.	.	6	26240855	26240855	C	T	0.19		8	34		57	25730	2019-01-01	ENST00000377745.2:c.202C>T
Uterine Corpus Endometrial Carcinoma (TCGA, PanCancer Atlas)	TCGA-A5-A1OF-01	Uterine Mixed Endometrial Carcinoma	R68W	OncoKB: NA;CIViC: NA;MyCancerGenome: not present;CancerHotspot: no;3DHotspot: no	MutationAssessor: Error;SIFT: impact: tolerated, score: 0.05;Polyphen-2: impact: benign, score: 0.119	Missense_Mutation	diploid		.	.	.	6	26240855	26240855	C	T	0.4		20	30		35	10507	2019-01-01	ENST00000377745.2:c.202C>T
Uterine Corpus Endometrial Carcinoma (TCGA, PanCancer Atlas)	TCGA-DI-A1BU-01	Uterine Mixed Endometrial Carcinoma	A77V	OncoKB: NA;CIViC: NA;MyCancerGenome: not present;CancerHotspot: no;3DHotspot: no	MutationAssessor: Error;SIFT: impact: deleterious, score: 0;Polyphen-2: impact: benign, score: 0.151	Missense_Mutation	diploid		.	.	.	6	26240883	26240883	C	T	0.19		14	58		32	7644	2019-01-01	ENST00000377745.2:c.230C>T
Stomach Adenocarcinoma (TCGA, PanCancer Atlas)	TCGA-VQ-A8PP-01	Tubular Stomach Adenocarcinoma	R96H	OncoKB: NA;CIViC: NA;MyCancerGenome: not present;CancerHotspot: no;3DHotspot: no	MutationAssessor: Error;SIFT: impact: tolerated, score: 0.07;Polyphen-2: impact: probably_damaging, score: 0.923	Missense_Mutation	diploid	1	.	.	.	6	26240940	26240940	G	A	0.32		20	42		71	1328	2019-01-01	ENST00000377745.2:c.287G>A

## Sheet: HIST1H4G
Study	Sample ID	Cancer Type	Protein Change	Annotation	Functional Impact	Mutation Type	Copy #	COSMIC	MS	VS	Center	Chromosome	Start Pos	End Pos	Ref	Var	Allele Freq (T)	Allele Freq (N)	Variant Reads	Ref Reads	Variant Reads (N)	Ref Reads (N)	# Mut in Sample
Pan-Lung Cancer (TCGA, Nat Genet 2016)	TCGA-MN-A4N4-01	Lung Adenocarcinoma	S2F	OncoKB: NA;CIViC: NA;MyCancerGenome: not present;CancerHotspot: no;3DHotspot: no	MutationAssessor: Error;SIFT: impact: deleterious_low_confidence, score: 0;Polyphen-2: impact: probably_damaging, score: 0.974	Missense_Mutation			Somatic	NA	broad.mit.edu	6	26247201	26247201	G	A			6	42		58	1308
Skin Cutaneous Melanoma (TCGA, Provisional)	TCGA-GN-A26C-01	Desmoplastic Melanoma	R4W	OncoKB: NA;CIViC: NA;MyCancerGenome: not present;CancerHotspot: no;3DHotspot: no	MutationAssessor: Error;SIFT: impact: deleterious_low_confidence, score: 0;Polyphen-2: impact: possibly_damaging, score: 0.727	Missense_Mutation		1	Somatic	NA	broad.mit.edu	6	26247196	26247196	G	A			26	24			1528
Small Cell Lung Cancer (CLCGP, Nat Genet 2012)	H2171	Small Cell Lung Cancer	G12R	OncoKB: NA;CIViC: NA;MyCancerGenome: not present;CancerHotspot: no;3DHotspot: no	MutationAssessor: Error;SIFT: impact: deleterious_low_confidence, score: 0.05;Polyphen-2: impact: probably_damaging, score: 0.997	Missense_Mutation		1	NA	Unknown	CLCGP	6	26247172	26247172	C	G							164
NCI-60 Cell Lines (NCI, Cancer Res. 2012)	CCRF_CEM	Leukemia	G15S	OncoKB: NA;CIViC: NA;MyCancerGenome: not present;CancerHotspot: no;3DHotspot: no	MutationAssessor: Error;SIFT: impact: deleterious_low_confidence, score: 0.03;Polyphen-2: impact: possibly_damaging, score: 0.862	Missense_Mutation		5	NA	NA	discover.nci.nih.gov	6	26247163	26247163	C	T							857
Merged Cohort of LGG and GBM (TCGA, Cell 2016)	TCGA-DH-5140-01	Diffuse Glioma	G15S	OncoKB: NA;CIViC: NA;MyCancerGenome: not present;CancerHotspot: no;3DHotspot: no	MutationAssessor: Error;SIFT: impact: deleterious_low_confidence, score: 0.03;Polyphen-2: impact: possibly_damaging, score: 0.862	Missense_Mutation		5	NA	NA	ucsc.edu/broad.mit.edu	6	26247163	26247163	C	T			20	105		132	19
Colorectal Adenocarcinoma (TCGA, Provisional)	TCGA-AA-3877-01	Mucinous Adenocarcinoma of the Colon and Rectum	G15S	OncoKB: NA;CIViC: NA;MyCancerGenome: not present;CancerHotspot: no;3DHotspot: no	MutationAssessor: Error;SIFT: impact: deleterious_low_confidence, score: 0.03;Polyphen-2: impact: possibly_damaging, score: 0.862	Missense_Mutation		5	Somatic	Valid	broad.mit.edu	6	26247163	26247163	C	T							772
Uterine Corpus Endometrial Carcinoma (TCGA, Provisional)	TCGA-D1-A103-01	Uterine Endometrioid Carcinoma	G15S	OncoKB: NA;CIViC: NA;MyCancerGenome: not present;CancerHotspot: no;3DHotspot: no	MutationAssessor: Error;SIFT: impact: deleterious_low_confidence, score: 0.03;Polyphen-2: impact: possibly_damaging, score: 0.862	Missense_Mutation		5	Somatic	Untested	genome.wustl.edu	6	26247163	26247163	C	T			11	22		46	5982
Cutaneous Squamous Cell Carcinoma (MD Anderson, Clin Cancer Res 2014)	CSCC-27-T	Cutaneous Squamous Cell Carcinoma	R20C	OncoKB: NA;CIViC: NA;MyCancerGenome: not present;CancerHotspot: no;3DHotspot: no	MutationAssessor: Error;SIFT: impact: tolerated, score: 0.06;Polyphen-2: impact: benign, score: 0.081	Missense_Mutation			Somatic	Untested	hgsc.bcm.edu	6	26247148	26247148	G	A			22	78		99	7301
Ampullary Carcinoma (Baylor College of Medicine, Cell Reports 2016)	CAC_3117	Ampulla of Vater	R20H	OncoKB: NA;CIViC: NA;MyCancerGenome: not present;CancerHotspot: no;3DHotspot: no	MutationAssessor: Error;SIFT: impact: tolerated, score: 0.16;Polyphen-2: impact: benign, score: 0.361	Missense_Mutation			Somatic	Untested	Baylor College of Medicine	6	26247147	26247147	C	T			39	97		107	2619
Liver Hepatocellular Carcinoma (TCGA, Provisional)	TCGA-2Y-A9H9-01	Hepatocellular Carcinoma	K21E	OncoKB: NA;CIViC: NA;MyCancerGenome: not present;CancerHotspot: no;3DHotspot: no	MutationAssessor: Error;SIFT: impact: deleterious, score: 0;Polyphen-2: impact: probably_damaging, score: 0.928	Missense_Mutation			Somatic	Untested	hgsc.bcm.edu	6	26247145	26247145	T	C			34	41		60	107
Colorectal Adenocarcinoma (DFCI, Cell Reports 2016)	coadread_dfci_2016_102	Colorectal Adenocarcinoma	V22A	OncoKB: NA;CIViC: NA;MyCancerGenome: not present;CancerHotspot: no;3DHotspot: no	MutationAssessor: Error;SIFT: impact: deleterious, score: 0.03;Polyphen-2: impact: benign, score: 0.178	Missense_Mutation			NA	NA	dfci.harvard.edu	6	26247141	26247141	A	G							1333
Colon Adenocarcinoma (TCGA, PanCancer Atlas)	TCGA-CM-4743-01	Colon Adenocarcinoma	L23P	OncoKB: NA;CIViC: NA;MyCancerGenome: not present;CancerHotspot: no;3DHotspot: no	MutationAssessor: Error;SIFT: impact: deleterious, score: 0.02;Polyphen-2: impact: probably_damaging, score: 0.954	Missense_Mutation		1	.	.	.	6	26247138	26247138	A	G			29	113		135	1107
Colorectal Adenocarcinoma (DFCI, Cell Reports 2016)	coadread_dfci_2016_3451	Colorectal Adenocarcinoma	L23P	OncoKB: NA;CIViC: NA;MyCancerGenome: not present;CancerHotspot: no;3DHotspot: no	MutationAssessor: Error;SIFT: impact: deleterious, score: 0.02;Polyphen-2: impact: probably_damaging, score: 0.954	Missense_Mutation		1	NA	NA	dfci.harvard.edu	6	26247138	26247138	A	G							1081
Merged Cohort of LGG and GBM (TCGA, Cell 2016)	TCGA-WH-A86K-01	Diffuse Glioma	D25G	OncoKB: NA;CIViC: NA;MyCancerGenome: not present;CancerHotspot: no;3DHotspot: no	MutationAssessor: Error;SIFT: impact: deleterious, score: 0.03;Polyphen-2: impact: benign, score: 0.168	Missense_Mutation			NA	NA	mdanderson.org/ucsc.edu/broad.mit.edu	6	26247132	26247132	T	C			14	32		60	27
Pancreatic Adenocarcinoma (TCGA, Provisional)	TCGA-IB-7651-01	Pancreatic Adenocarcinoma	N26K	OncoKB: NA;CIViC: NA;MyCancerGenome: not present;CancerHotspot: no;3DHotspot: no	MutationAssessor: Error;SIFT: impact: deleterious, score: 0;Polyphen-2: impact: possibly_damaging, score: 0.734	Missense_Mutation			Somatic	Untested	broad.mit.edu	6	26247128	26247128	A	T			50	205		50	14751
Cervical Squamous Cell Carcinoma and Endocervical Adenocarcinoma (TCGA, Provisional)	TCGA-JW-A5VL-01	Cervical Squamous Cell Carcinoma	Q28E	OncoKB: NA;CIViC: NA;MyCancerGenome: not present;CancerHotspot: no;3DHotspot: no	MutationAssessor: Error;SIFT: impact: deleterious, score: 0.05;Polyphen-2: impact: benign, score: 0.259	Missense_Mutation			Somatic	Untested	genome.wustl.edu	6	26247124	26247124	G	C				22		30	1809
Lung Adenocarcinoma (Broad, Cell 2012)	LUAD-NYU160	Lung Adenocarcinoma	R36W	OncoKB: NA;CIViC: NA;MyCancerGenome: not present;CancerHotspot: no;3DHotspot: no	MutationAssessor: Error;SIFT: impact: deleterious, score: 0;Polyphen-2: impact: probably_damaging, score: 0.991	Missense_Mutation			Unknown	NA	broad.mit.edu	6	26247100	26247100	G	A							231
Colorectal Adenocarcinoma (DFCI, Cell Reports 2016)	coadread_dfci_2016_3045	Colorectal Adenocarcinoma	H41N	OncoKB: NA;CIViC: NA;MyCancerGenome: not present;CancerHotspot: no;3DHotspot: no	MutationAssessor: Error;SIFT: impact: deleterious, score: 0;Polyphen-2: impact: benign, score: 0.247	Missense_Mutation			NA	NA	dfci.harvard.edu	6	26247085	26247085	G	T							244
Metastatic Prostate Cancer, SU2C/PCF Dream Team (Robinson et al., Cell 2015)	SC_9047	Prostate Adenocarcinoma	G43S	OncoKB: NA;CIViC: NA;MyCancerGenome: not present;CancerHotspot: no;3DHotspot: no	MutationAssessor: Error;SIFT: impact: deleterious, score: 0.02;Polyphen-2: impact: possibly_damaging, score: 0.84	Missense_Mutation			NA	NA	NA	6	26247079	26247079	C	T				428			1005
Uterine Corpus Endometrial Carcinoma (TCGA, Provisional)	TCGA-AX-A2HF-01	Uterine Serous Carcinoma/Uterine Papillary Serous Carcinoma	I47M	OncoKB: NA;CIViC: NA;MyCancerGenome: not present;CancerHotspot: no;3DHotspot: no	MutationAssessor: Error;SIFT: impact: deleterious, score: 0.03;Polyphen-2: impact: probably_damaging, score: 0.998	Missense_Mutation		1	Somatic	Untested	genome.wustl.edu	6	26247065	26247065	G	C			9	25		37	29
Pan-Lung Cancer (TCGA, Nat Genet 2016)	TCGA-77-A5G7-01	Lung Squamous Cell Carcinoma	Y52F	OncoKB: NA;CIViC: NA;MyCancerGenome: not present;CancerHotspot: no;3DHotspot: no	MutationAssessor: Error;SIFT: impact: deleterious, score: 0.02;Polyphen-2: impact: probably_damaging, score: 0.99	Missense_Mutation		1	Somatic	NA	broad.mit.edu	6	26247051	26247051	T	A			14	43		43	73
Skin Cutaneous Melanoma (TCGA, Provisional)	TCGA-EE-A3AF-06	Cutaneous Melanoma	Y52H	OncoKB: NA;CIViC: NA;MyCancerGenome: not present;CancerHotspot: no;3DHotspot: no	MutationAssessor: Error;SIFT: impact: deleterious, score: 0.02;Polyphen-2: impact: probably_damaging, score: 0.997	Missense_Mutation		1	Somatic	NA	broad.mit.edu	6	26247052	26247052	A	G			34	29			859
Cutaneous Squamous Cell Carcinoma (MD Anderson, Clin Cancer Res 2014)	CSCC-44-T	Cutaneous Squamous Cell Carcinoma	E53K	OncoKB: NA;CIViC: NA;MyCancerGenome: not present;CancerHotspot: no;3DHotspot: no	MutationAssessor: Error;SIFT: impact: tolerated, score: 0.1;Polyphen-2: impact: possibly_damaging, score: 0.597	Missense_Mutation			Somatic	Untested	hgsc.bcm.edu	6	26247049	26247049	C	T			38	134		160	3841
TCGA data for Esophagus-Stomach Cancers (TCGA, Nature 2017)	TCGA-HF-A5NB-01	Stomach Adenocarcinoma	R56H	OncoKB: NA;CIViC: NA;MyCancerGenome: not present;CancerHotspot: no;3DHotspot: no	MutationAssessor: Error;SIFT: impact: deleterious, score: 0.04;Polyphen-2: impact: possibly_damaging, score: 0.756	Missense_Mutation			Somatic	Untested	genome.wustl.edu	6	26247039	26247039	C	T			35	5		49	1425
Colorectal Adenocarcinoma (DFCI, Cell Reports 2016)	coadread_dfci_2016_1244	Colorectal Adenocarcinoma	R57G	OncoKB: NA;CIViC: NA;MyCancerGenome: not present;CancerHotspot: no;3DHotspot: no	MutationAssessor: Error;SIFT: impact: tolerated, score: 1;Polyphen-2: impact: benign, score: 0	Missense_Mutation		1	NA	NA	dfci.harvard.edu	6	26247037	26247037	G	C							141
TCGA data for Esophagus-Stomach Cancers (TCGA, Nature 2017)	TCGA-BR-4362-01	Stomach Adenocarcinoma	R57Q	OncoKB: NA;CIViC: NA;MyCancerGenome: not present;CancerHotspot: no;3DHotspot: no	MutationAssessor: Error;SIFT: impact: deleterious, score: 0.02;Polyphen-2: impact: benign, score: 0.112	Missense_Mutation		1	Somatic	Untested	genome.wustl.edu	6	26247036	26247036	C	T			12	37		55	1534
Colorectal Adenocarcinoma (DFCI, Cell Reports 2016)	coadread_dfci_2016_1212	Colorectal Adenocarcinoma	R57W	OncoKB: NA;CIViC: NA;MyCancerGenome: not present;CancerHotspot: no;3DHotspot: no	MutationAssessor: Error;SIFT: impact: deleterious, score: 0.01;Polyphen-2: impact: benign, score: 0.002	Missense_Mutation		1	NA	NA	dfci.harvard.edu	6	26247037	26247037	G	A							1556
Pediatric Ewing Sarcoma (DFCI, Cancer Discov 2014)	Cado-ES1	Ewing Sarcoma	V58L	OncoKB: NA;CIViC: NA;MyCancerGenome: not present;CancerHotspot: no;3DHotspot: no	MutationAssessor: Error;SIFT: impact: deleterious, score: 0.01;Polyphen-2: impact: benign, score: 0.4	Missense_Mutation			NA	NA	dfci.harvard.edu	6	26247034	26247034	C	G							276
Renal Non-Clear Cell Carcinoma (Genentech, Nat Genet 2014)	9266994	Renal Non-Clear Cell Carcinoma	V61M	OncoKB: NA;CIViC: NA;MyCancerGenome: not present;CancerHotspot: no;3DHotspot: no	MutationAssessor: Error;SIFT: impact: deleterious, score: 0;Polyphen-2: impact: probably_damaging, score: 0.972	Missense_Mutation			NA	NA	Genentech.Inc	6	26247025	26247025	C	T							40
Pan-Lung Cancer (TCGA, Nat Genet 2016)	TCGA-90-A4EE-01	Lung Squamous Cell Carcinoma	I67M	OncoKB: NA;CIViC: NA;MyCancerGenome: not present;CancerHotspot: no;3DHotspot: no	MutationAssessor: Error;SIFT: impact: deleterious, score: 0;Polyphen-2: impact: probably_damaging, score: 0.964	Missense_Mutation		1	Somatic	NA	broad.mit.edu	6	26247005	26247005	G	C			22	48		52	320
Colorectal Adenocarcinoma (Genentech, Nature 2012)	587386	Colorectal Adenocarcinoma	I67S	OncoKB: NA;CIViC: NA;MyCancerGenome: not present;CancerHotspot: no;3DHotspot: no	MutationAssessor: Error;SIFT: impact: deleterious, score: 0.01;Polyphen-2: impact: probably_damaging, score: 0.934	Missense_Mutation		1	NA	NA	Genentech	6	26247006	26247006	A	C							114
Esophageal Adenocarcinoma (Broad, Nat Genet 2013)	ESO-859	Esophageal Adenocarcinoma	Y69H	OncoKB: NA;CIViC: NA;MyCancerGenome: not present;CancerHotspot: no;3DHotspot: no	MutationAssessor: Error;SIFT: impact: deleterious, score: 0.02;Polyphen-2: impact: benign, score: 0.006	Missense_Mutation		1	Somatic	NA	broad.mit.edu	6	26247001	26247001	A	G				10			1681
Pancreatic Adenocarcinoma (QCMG, Nature 2016)	ICGC_0346	Pancreatic Adenocarcinoma	Y69H	OncoKB: NA;CIViC: NA;MyCancerGenome: not present;CancerHotspot: no;3DHotspot: no	MutationAssessor: Error;SIFT: impact: deleterious, score: 0.02;Polyphen-2: impact: benign, score: 0.006	Missense_Mutation		1	Somatic	NA	qcmg.uq.edu.au	6	26247001	26247001	A	G							44
Stomach Adenocarcinoma (TCGA, Provisional)	TCGA-BR-8060-01	Stomach Adenocarcinoma	Y69H	OncoKB: NA;CIViC: NA;MyCancerGenome: not present;CancerHotspot: no;3DHotspot: no	MutationAssessor: Error;SIFT: impact: deleterious, score: 0.02;Polyphen-2: impact: benign, score: 0.006	Missense_Mutation		1	Somatic	Untested	genome.wustl.edu	6	26247001	26247001	A	G							170
Liver Hepatocellular Carcinoma (TCGA, Provisional)	TCGA-BC-A10U-01	Hepatocellular Carcinoma	V71M	OncoKB: NA;CIViC: NA;MyCancerGenome: not present;CancerHotspot: no;3DHotspot: no	MutationAssessor: Error;SIFT: impact: deleterious, score: 0.02;Polyphen-2: impact: possibly_damaging, score: 0.875	Missense_Mutation			Somatic	Untested	hgsc.bcm.edu	6	26246995	26246995	C	T			120	103		82	116
Colorectal Adenocarcinoma (DFCI, Cell Reports 2016)	coadread_dfci_2016_4430	Colorectal Adenocarcinoma	V71M	OncoKB: NA;CIViC: NA;MyCancerGenome: not present;CancerHotspot: no;3DHotspot: no	MutationAssessor: Error;SIFT: impact: deleterious, score: 0.02;Polyphen-2: impact: possibly_damaging, score: 0.875	Missense_Mutation			NA	NA	dfci.harvard.edu	6	26246995	26246995	C	T							696
Testicular Germ Cell Cancer (TCGA, Provisional)	TCGA-2G-AAG8-01	Embryonal Carcinoma	R79C	OncoKB: NA;CIViC: NA;MyCancerGenome: not present;CancerHotspot: no;3DHotspot: no	MutationAssessor: Error;SIFT: impact: deleterious, score: 0.01;Polyphen-2: impact: benign, score: 0.117	Missense_Mutation			Somatic	Untested	hgsc.bcm.edu;broad.mit.edu;bcgsc.ca;mdanderson.org	6	26246971	26246971	G	A							51
Pan-Lung Cancer (TCGA, Nat Genet 2016)	TCGA-69-7979-01	Lung Adenocarcinoma	V87L	OncoKB: NA;CIViC: NA;MyCancerGenome: not present;CancerHotspot: no;3DHotspot: no	MutationAssessor: Error;SIFT: impact: deleterious, score: 0;Polyphen-2: impact: benign, score: 0.201	Missense_Mutation		2	Somatic	NA	broad.mit.edu	6	26246947	26246947	C	A			15	53		73	1256
TCGA data for Esophagus-Stomach Cancers (TCGA, Nature 2017)	TCGA-CG-4442-01	Stomach Adenocarcinoma	V87M	OncoKB: NA;CIViC: NA;MyCancerGenome: not present;CancerHotspot: no;3DHotspot: no	MutationAssessor: Error;SIFT: impact: deleterious, score: 0.03;Polyphen-2: impact: benign, score: 0.393	Missense_Mutation		2	Somatic	Untested	genome.wustl.edu	6	26246947	26246947	C	T			31	46		64	1405
Colon Adenocarcinoma (TCGA, PanCancer Atlas)	TCGA-CA-5797-01	Colon Adenocarcinoma	V87M	OncoKB: NA;CIViC: NA;MyCancerGenome: not present;CancerHotspot: no;3DHotspot: no	MutationAssessor: Error;SIFT: impact: deleterious, score: 0.03;Polyphen-2: impact: benign, score: 0.393	Missense_Mutation		2	.	.	.	6	26246947	26246947	C	T			41	53		129	60
Head and Neck Squamous Cell Carcinoma (TCGA, Provisional)	TCGA-CQ-6225-01	Head and Neck Squamous Cell Carcinoma	V90M	OncoKB: NA;CIViC: NA;MyCancerGenome: not present;CancerHotspot: no;3DHotspot: no	MutationAssessor: Error;SIFT: impact: deleterious, score: 0;Polyphen-2: impact: possibly_damaging, score: 0.803	Missense_Mutation			Somatic	NA	broad.mit.edu	6	26246938	26246938	C	T			12	44			148
Genomic Hallmarks of Prostate Adenocarcinoma (CPC-GENE, Nature 2017)	CPCG0331-F1	Prostate Adenocarcinoma	R93H	OncoKB: NA;CIViC: NA;MyCancerGenome: not present;CancerHotspot: no;3DHotspot: no	MutationAssessor: Error;SIFT: impact: tolerated, score: 0.07;Polyphen-2: impact: benign, score: 0.075	Missense_Mutation		1	Somatic	Unknown	CPCGene	6	26246928	26246928	C	T							13
NCI-60 Cell Lines (NCI, Cancer Res. 2012)	DU_145	Prostate	R93H	OncoKB: NA;CIViC: NA;MyCancerGenome: not present;CancerHotspot: no;3DHotspot: no	MutationAssessor: Error;SIFT: impact: tolerated, score: 0.07;Polyphen-2: impact: benign, score: 0.075	Missense_Mutation		1	NA	NA	discover.nci.nih.gov	6	26246928	26246928	C	T							1374
Colon Adenocarcinoma (TCGA, PanCancer Atlas)	TCGA-G4-6304-01	Colon Adenocarcinoma	R93H	OncoKB: NA;CIViC: NA;MyCancerGenome: not present;CancerHotspot: no;3DHotspot: no	MutationAssessor: Error;SIFT: impact: tolerated, score: 0.07;Polyphen-2: impact: benign, score: 0.075	Missense_Mutation		1	.	.	.	6	26246928	26246928	C	T			7	70		31	926
Breast Invasive Carcinoma (Broad, Nature 2012)	BR-M-045	Breast Invasive Ductal Carcinoma	R96S	OncoKB: NA;CIViC: NA;MyCancerGenome: not present;CancerHotspot: no;3DHotspot: no	MutationAssessor: Error;SIFT: impact: deleterious, score: 0;Polyphen-2: impact: benign, score: 0.21	Missense_Mutation			Somatic	NA	broad.mit.edu	6	26246918	26246918	T	G							101
Liver Hepatocellular Carcinoma (TCGA, Provisional)	TCGA-G3-A3CJ-01	Hepatocellular Carcinoma	L98P	OncoKB: NA;CIViC: NA;MyCancerGenome: not present;CancerHotspot: no;3DHotspot: no	MutationAssessor: Error;SIFT: impact: deleterious, score: 0;Polyphen-2: impact: probably_damaging, score: 0.966	Missense_Mutation			Somatic	Untested	hgsc.bcm.edu	6	26246913	26246913	A	G			40	75		138	1290
Skin Cutaneous Melanoma (TCGA, PanCancer Atlas)	TCGA-D3-A2JD-06	Cutaneous Melanoma	R4L	OncoKB: NA;CIViC: NA;MyCancerGenome: not present;CancerHotspot: no;3DHotspot: no	MutationAssessor: Error;SIFT: impact: deleterious_low_confidence, score: 0.02;Polyphen-2: impact: benign, score: 0.027	Missense_Mutation	shallowdel	1	.	.	.	6	26247195	26247195	C	A	0.09		6	59		56	1225	2019-01-01	ENST00000244537.4:c.11G>T
Head and Neck Squamous Cell Carcinoma (TCGA, PanCancer Atlas)	TCGA-CV-6945-01	Head and Neck Squamous Cell Carcinoma	R4L	OncoKB: NA;CIViC: NA;MyCancerGenome: not present;CancerHotspot: no;3DHotspot: no	MutationAssessor: Error;SIFT: impact: deleterious_low_confidence, score: 0.02;Polyphen-2: impact: benign, score: 0.027	Missense_Mutation	shallowdel	1	.	.	.	6	26247195	26247195	C	A	0.11		4	34		56	123	2019-01-01	ENST00000244537.4:c.11G>T
Uterine Corpus Endometrial Carcinoma (TCGA, PanCancer Atlas)	TCGA-AP-A051-01	Uterine Endometrioid Carcinoma	R4Q	OncoKB: NA;CIViC: NA;MyCancerGenome: not present;CancerHotspot: no;3DHotspot: no	MutationAssessor: Error;SIFT: impact: tolerated_low_confidence, score: 0.09;Polyphen-2: impact: benign, score: 0.267	Missense_Mutation	diploid	1	.	.	.	6	26247195	26247195	C	T	0.21		6	22		41	8318	2019-01-01	ENST00000244537.4:c.11G>A
Uterine Corpus Endometrial Carcinoma (TCGA, PanCancer Atlas)	TCGA-AX-A3FT-01	Uterine Endometrioid Carcinoma	S24N	OncoKB: NA;CIViC: NA;MyCancerGenome: not present;CancerHotspot: no;3DHotspot: no	MutationAssessor: Error;SIFT: impact: deleterious, score: 0;Polyphen-2: impact: benign, score: 0.057	Missense_Mutation	diploid		.	.	.	6	26247135	26247135	C	T	0.26		8	23		23	1281	2019-01-01	ENST00000244537.4:c.71G>A
Uterine Corpus Endometrial Carcinoma (TCGA, PanCancer Atlas)	TCGA-DF-A2KU-01	Uterine Endometrioid Carcinoma	D25N	OncoKB: NA;CIViC: NA;MyCancerGenome: not present;CancerHotspot: no;3DHotspot: no	MutationAssessor: Error;SIFT: impact: tolerated, score: 0.05;Polyphen-2: impact: possibly_damaging, score: 0.477	Missense_Mutation	diploid		.	.	.	6	26247133	26247133	C	T	0.37		7	12		11	10059	2019-01-01	ENST00000244537.4:c.73G>A
Uterine Corpus Endometrial Carcinoma (TCGA, PanCancer Atlas)	TCGA-D1-A103-01	Uterine Endometrioid Carcinoma	N26T	OncoKB: NA;CIViC: NA;MyCancerGenome: not present;CancerHotspot: no;3DHotspot: no	MutationAssessor: Error;SIFT: impact: tolerated, score: 0.09;Polyphen-2: impact: probably_damaging, score: 0.969	Missense_Mutation	diploid		.	.	.	6	26247129	26247129	T	G	0.1		4	38		49	6855	2019-01-01	ENST00000244537.4:c.77A>C
Uterine Corpus Endometrial Carcinoma (TCGA, PanCancer Atlas)	TCGA-EO-A22X-01	Uterine Endometrioid Carcinoma	R36Q	OncoKB: NA;CIViC: NA;MyCancerGenome: not present;CancerHotspot: no;3DHotspot: no	MutationAssessor: Error;SIFT: impact: deleterious, score: 0;Polyphen-2: impact: probably_damaging, score: 0.939	Missense_Mutation	diploid	1	.	.	.	6	26247099	26247099	C	T	0.39		9	14		30	9438	2019-01-01	ENST00000244537.4:c.107G>A
Uterine Corpus Endometrial Carcinoma (TCGA, PanCancer Atlas)	TCGA-FI-A2D5-01	Uterine Endometrioid Carcinoma	R37H	OncoKB: NA;CIViC: NA;MyCancerGenome: not present;CancerHotspot: no;3DHotspot: no	MutationAssessor: Error;SIFT: impact: tolerated, score: 0.1;Polyphen-2: impact: possibly_damaging, score: 0.458	Missense_Mutation	diploid		.	.	.	6	26247096	26247096	C	T	0.44		14	18		40	13874	2019-01-01	ENST00000244537.4:c.110G>A
Skin Cutaneous Melanoma (TCGA, PanCancer Atlas)	TCGA-D3-A8GI-06	Cutaneous Melanoma	R40Q	OncoKB: NA;CIViC: NA;MyCancerGenome: not present;CancerHotspot: no;3DHotspot: no	MutationAssessor: Error;SIFT: impact: deleterious, score: 0.04;Polyphen-2: impact: possibly_damaging, score: 0.627	Missense_Mutation	shallowdel		.	.	.	6	26247087	26247087	C	T	0.21		8	30		59	4286	2019-01-01	ENST00000244537.4:c.119G>A
Uterine Corpus Endometrial Carcinoma (TCGA, PanCancer Atlas)	TCGA-B5-A3FC-01	Uterine Endometrioid Carcinoma	G43S	OncoKB: NA;CIViC: NA;MyCancerGenome: not present;CancerHotspot: no;3DHotspot: no	MutationAssessor: Error;SIFT: impact: deleterious, score: 0.02;Polyphen-2: impact: possibly_damaging, score: 0.84	Missense_Mutation	diploid		.	.	.	6	26247079	26247079	C	T	0.35		12	22		50	12217	2019-01-01	ENST00000244537.4:c.127G>A
Skin Cutaneous Melanoma (TCGA, PanCancer Atlas)	TCGA-FS-A1Z4-06	Cutaneous Melanoma	R57L	OncoKB: NA;CIViC: NA;MyCancerGenome: not present;CancerHotspot: no;3DHotspot: no	MutationAssessor: Error;SIFT: impact: deleterious, score: 0.01;Polyphen-2: impact: benign, score: 0.033	Missense_Mutation	gain	1	.	.	.	6	26247036	26247036	C	A	0.13		5	33		44	609	2019-01-01	ENST00000244537.4:c.170G>T
MSS Mixed Solid Tumors (Broad/Dana-Farber, Nat Genet 2018)	MEL-IPI_Pat117-Tumor-SM-5X2QU	Cutaneous Melanoma	A70V	OncoKB: NA;CIViC: NA;MyCancerGenome: not present;CancerHotspot: no;3DHotspot: no	MutationAssessor: Error;SIFT: impact: tolerated, score: 0.07;Polyphen-2: impact: possibly_damaging, score: 0.58	Missense_Mutation			NA	NA	NA	6	26246997	26246997	G	A	0.26		46	132			708	2019-01-01	ENST00000244537.4:c.209C>T
Kidney Renal Clear Cell Carcinoma (TCGA, PanCancer Atlas)	TCGA-CZ-5455-01	Renal Clear Cell Carcinoma	V71A	OncoKB: NA;CIViC: NA;MyCancerGenome: not present;CancerHotspot: no;3DHotspot: no	MutationAssessor: Error;SIFT: impact: deleterious, score: 0.02;Polyphen-2: impact: probably_damaging, score: 0.983	Missense_Mutation	diploid		.	.	.	6	26246994	26246994	A	G	0.14		4	24		25	38	2019-01-01	ENST00000244537.4:c.212T>C
Ovarian Serous Cystadenocarcinoma (TCGA, PanCancer Atlas)	TCGA-61-1733-01	Serous Ovarian Cancer	K78N	OncoKB: NA;CIViC: NA;MyCancerGenome: not present;CancerHotspot: no;3DHotspot: no	MutationAssessor: Error;SIFT: impact: deleterious, score: 0.05;Polyphen-2: impact: benign, score: 0.248	Missense_Mutation	shallowdel	1	.	.	.	6	26246972	26246972	C	A	0.52		13	12		52	44	2019-01-01	ENST00000244537.4:c.234G>T
Uterine Corpus Endometrial Carcinoma (TCGA, PanCancer Atlas)	TCGA-AJ-A3TW-01	Uterine Serous Carcinoma/Uterine Papillary Serous Carcinoma	R79P	OncoKB: NA;CIViC: NA;MyCancerGenome: not present;CancerHotspot: no;3DHotspot: no	MutationAssessor: Error;SIFT: impact: deleterious, score: 0;Polyphen-2: impact: probably_damaging, score: 0.947	Missense_Mutation	amp		.	.	.	6	26246970	26246970	C	G	0.19		7	30		39	113	2019-01-01	ENST00000244537.4:c.236G>C
Uterine Corpus Endometrial Carcinoma (TCGA, PanCancer Atlas)	TCGA-EY-A215-01	Uterine Endometrioid Carcinoma	A84T	OncoKB: NA;CIViC: NA;MyCancerGenome: not present;CancerHotspot: no;3DHotspot: no	MutationAssessor: Error;SIFT: impact: tolerated, score: 0.09;Polyphen-2: impact: benign, score: 0.229	Missense_Mutation	diploid	1	.	.	.	6	26246956	26246956	C	T	0.47		27	30		65	4653	2019-01-01	ENST00000244537.4:c.250G>A
Uterine Corpus Endometrial Carcinoma (TCGA, PanCancer Atlas)	TCGA-FI-A2D5-01	Uterine Endometrioid Carcinoma	A84T	OncoKB: NA;CIViC: NA;MyCancerGenome: not present;CancerHotspot: no;3DHotspot: no	MutationAssessor: Error;SIFT: impact: tolerated, score: 0.09;Polyphen-2: impact: benign, score: 0.229	Missense_Mutation	diploid	1	.	.	.	6	26246956	26246956	C	T	0.14		8	50		68	13874	2019-01-01	ENST00000244537.4:c.250G>A
Thyroid Carcinoma (TCGA, PanCancer Atlas)	TCGA-ET-A40T-01	Papillary Thyroid Cancer	V87M	OncoKB: NA;CIViC: NA;MyCancerGenome: not present;CancerHotspot: no;3DHotspot: no	MutationAssessor: Error;SIFT: impact: deleterious, score: 0.03;Polyphen-2: impact: benign, score: 0.393	Missense_Mutation	diploid	2	.	.	.	6	26246947	26246947	C	T	0.3		52	122		95	8	2019-01-01	ENST00000244537.4:c.259G>A
Skin Cutaneous Melanoma (TCGA, PanCancer Atlas)	TCGA-GF-A2C7-01	Cutaneous Melanoma	Q94H	OncoKB: NA;CIViC: NA;MyCancerGenome: not present;CancerHotspot: no;3DHotspot: no	MutationAssessor: Error;SIFT: impact: deleterious, score: 0.02;Polyphen-2: impact: probably_damaging, score: 0.976	Missense_Mutation			.	.	.	6	26246924	26246924	C	A	0.14		5	32		46	397	2019-01-01	ENST00000244537.4:c.282G>T
Uterine Corpus Endometrial Carcinoma (TCGA, PanCancer Atlas)	TCGA-AJ-A3TW-01	Uterine Serous Carcinoma/Uterine Papillary Serous Carcinoma	R96K	OncoKB: NA;CIViC: NA;MyCancerGenome: not present;CancerHotspot: no;3DHotspot: no	MutationAssessor: Error;SIFT: impact: tolerated, score: 0.05;Polyphen-2: impact: benign, score: 0.081	Missense_Mutation	amp		.	.	.	6	26246919	26246919	C	T	0.29		8	20		28	113	2019-01-01	ENST00000244537.4:c.287G>A
Uterine Corpus Endometrial Carcinoma (TCGA, PanCancer Atlas)	TCGA-B5-A3FC-01	Uterine Endometrioid Carcinoma	T97A	OncoKB: NA;CIViC: NA;MyCancerGenome: not present;CancerHotspot: no;3DHotspot: no	MutationAssessor: Error;SIFT: impact: deleterious, score: 0.01;Polyphen-2: impact: probably_damaging, score: 0.948	Missense_Mutation	diploid		.	.	.	6	26246917	26246917	T	C	0.44		16	20		51	12217	2019-01-01	ENST00000244537.4:c.289A>G
Upper Tract Urothelial Carcinoma (Cornell/Baylor/MDACC, Nat Comm 2019)	BCM-MDA-UTUC-17	Upper Tract Urothelial Carcinoma	T97A	OncoKB: NA;CIViC: NA;MyCancerGenome: not present;CancerHotspot: no;3DHotspot: no	MutationAssessor: Error;SIFT: impact: deleterious, score: 0.01;Polyphen-2: impact: probably_damaging, score: 0.948	Missense_Mutation			Somatic	NA	Baylor-MDACC	6	26246917	26246917	T	C	0.15		27	150		24	68	2019-01-01	ENST00000244537.4:c.289A>G

## Sheet: HIST1H4H
Study	Sample ID	Cancer Type	Protein Change	Annotation	Functional Impact	Mutation Type	Copy #	COSMIC	MS	VS	Center	Chromosome	Start Pos	End Pos	Ref	Var	Allele Freq (T)	Allele Freq (N)	Variant Reads	Ref Reads	Variant Reads (N)	Ref Reads (N)	# Mut in Sample
Bladder Cancer (TCGA, Cell 2017)	TCGA-DK-A3WW-01	Bladder Urothelial Carcinoma	S2C	OncoKB: NA;CIViC: NA;MyCancerGenome: not present;CancerHotspot: no;3DHotspot: no	MutationAssessor: impact: medium, score: 2.475;SIFT: impact: deleterious_low_confidence, score: 0.03;Polyphen-2: impact: benign, score: 0.184	Missense_Mutation		2	Somatic	NaN	broad.mit.edu	6	26285723	26285723	G	C				71			1061
Ovarian Serous Cystadenocarcinoma (TCGA, Provisional)	TCGA-13-0795-01	Serous Ovarian Cancer	S2C	OncoKB: NA;CIViC: NA;MyCancerGenome: not present;CancerHotspot: no;3DHotspot: no	MutationAssessor: impact: medium, score: 2.475;SIFT: impact: deleterious_low_confidence, score: 0.03;Polyphen-2: impact: benign, score: 0.184	Missense_Mutation		2	Somatic	Valid	genome.wustl.edu	6	26285723	26285723	G	C							54
Pan-Lung Cancer (TCGA, Nat Genet 2016)	TCGA-05-4397-01	Lung Adenocarcinoma	K6E	OncoKB: NA;CIViC: NA;MyCancerGenome: not present;CancerHotspot: no;3DHotspot: no	MutationAssessor: impact: medium, score: 3.43;SIFT: impact: deleterious_low_confidence, score: 0.01;Polyphen-2: impact: benign, score: 0.151	Missense_Mutation		1	Somatic	NA	broad.mit.edu	6	26285712	26285712	T	C			40	54		76	714
Colon Adenocarcinoma (TCGA, PanCancer Atlas)	TCGA-CK-4951-01	Mucinous Adenocarcinoma of the Colon and Rectum	G8E	OncoKB: NA;CIViC: NA;MyCancerGenome: not present;CancerHotspot: no;3DHotspot: no	MutationAssessor: impact: medium, score: 3.38;SIFT: impact: deleterious_low_confidence, score: 0;Polyphen-2: impact: probably_damaging, score: 0.932	Missense_Mutation			.	.	.	6	26285705	26285705	C	T			9	24		60	4195
Ovarian Serous Cystadenocarcinoma (TCGA, Provisional)	TCGA-13-1499-01	Serous Ovarian Cancer	A16V	OncoKB: NA;CIViC: NA;MyCancerGenome: not present;CancerHotspot: no;3DHotspot: no	MutationAssessor: impact: low, score: 1.89;SIFT: impact: deleterious, score: 0.04;Polyphen-2: impact: unknown, score: 0	Missense_Mutation		1	Somatic	Valid	genome.wustl.edu	6	26285681	26285681	G	A							50
TCGA data for Esophagus-Stomach Cancers (TCGA, Nature 2017)	TCGA-CD-8524-01	Stomach Adenocarcinoma	K17N	OncoKB: NA;CIViC: NA;MyCancerGenome: not present;CancerHotspot: no;3DHotspot: no	MutationAssessor: impact: high, score: 3.595;SIFT: impact: deleterious, score: 0;Polyphen-2: impact: benign, score: 0.17	Missense_Mutation		2	Somatic	Untested	genome.wustl.edu	6	26285677	26285677	C	A			11	48		162	170
Pan-Lung Cancer (TCGA, Nat Genet 2016)	TCGA-56-A4BX-01	Lung Squamous Cell Carcinoma	H19Y	OncoKB: NA;CIViC: NA;MyCancerGenome: not present;CancerHotspot: no;3DHotspot: no	MutationAssessor: impact: low, score: 1.54;SIFT: impact: deleterious, score: 0.03;Polyphen-2: impact: benign, score: 0.101	Missense_Mutation			Somatic	NA	broad.mit.edu	6	26285673	26285673	G	A			16	47		92	111
Pan-Lung Cancer (TCGA, Nat Genet 2016)	TCGA-18-3406-01	Lung Squamous Cell Carcinoma	T31A	OncoKB: NA;CIViC: NA;MyCancerGenome: not present;CancerHotspot: no;3DHotspot: no	MutationAssessor: impact: medium, score: 3.035;SIFT: impact: deleterious, score: 0.03;Polyphen-2: impact: possibly_damaging, score: 0.764	Missense_Mutation		1	Somatic	NA	broad.mit.edu	6	26285637	26285637	T	C			24	52		79	183
Pan-Lung Cancer (TCGA, Nat Genet 2016)	TCGA-55-7913-01	Lung Adenocarcinoma	A39T	OncoKB: NA;CIViC: NA;MyCancerGenome: not present;CancerHotspot: no;3DHotspot: no	MutationAssessor: impact: high, score: 3.52;SIFT: impact: deleterious, score: 0.01;Polyphen-2: impact: possibly_damaging, score: 0.75	Missense_Mutation			Somatic	NA	broad.mit.edu	6	26285613	26285613	C	T			7	81		133	302
Colorectal Adenocarcinoma (DFCI, Cell Reports 2016)	coadread_dfci_2016_213	Colorectal Adenocarcinoma	R40C	OncoKB: NA;CIViC: NA;MyCancerGenome: not present;CancerHotspot: no;3DHotspot: no	MutationAssessor: impact: medium, score: 2.945;SIFT: impact: deleterious, score: 0.03;Polyphen-2: impact: probably_damaging, score: 0.917	Missense_Mutation		1	NA	NA	dfci.harvard.edu	6	26285610	26285610	G	A							177
Head and Neck Squamous Cell Carcinoma (Broad, Science 2011)	HN_63021	Head and Neck Squamous Cell Carcinoma	R40G	OncoKB: NA;CIViC: NA;MyCancerGenome: not present;CancerHotspot: no;3DHotspot: no	MutationAssessor: impact: high, score: 4.04;SIFT: impact: deleterious, score: 0;Polyphen-2: impact: probably_damaging, score: 0.997	Missense_Mutation		1	Unknown	Unknown	broad.mit.edu	6	26285610	26285610	G	C			10	92			201
Prostate Adenocarcinoma (Fred Hutchinson CRC, Nat Med 2016)	06-081D3_PROSTATE	Prostate Adenocarcinoma	G43R	OncoKB: NA;CIViC: NA;MyCancerGenome: not present;CancerHotspot: no;3DHotspot: no	MutationAssessor: impact: high, score: 4.145;SIFT: impact: deleterious_low_confidence, score: 0;Polyphen-2: impact: probably_damaging, score: 1	Missense_Mutation			NA	NA	fhcrc	6	26285601	26285601	C	G				284			37
Prostate Adenocarcinoma (Fred Hutchinson CRC, Nat Med 2016)	06-081F2_LN	Prostate Adenocarcinoma	G43R	OncoKB: NA;CIViC: NA;MyCancerGenome: not present;CancerHotspot: no;3DHotspot: no	MutationAssessor: impact: high, score: 4.145;SIFT: impact: deleterious_low_confidence, score: 0;Polyphen-2: impact: probably_damaging, score: 1	Missense_Mutation			NA	NA	fhcrc	6	26285601	26285601	C	G				136			34
Prostate Adenocarcinoma (Fred Hutchinson CRC, Nat Med 2016)	06-081H5_LN	Prostate Adenocarcinoma	G43R	OncoKB: NA;CIViC: NA;MyCancerGenome: not present;CancerHotspot: no;3DHotspot: no	MutationAssessor: impact: high, score: 4.145;SIFT: impact: deleterious_low_confidence, score: 0;Polyphen-2: impact: probably_damaging, score: 1	Missense_Mutation			NA	NA	fhcrc	6	26285601	26285601	C	G				117			36
Prostate Adenocarcinoma (Fred Hutchinson CRC, Nat Med 2016)	06-081I1_LUNG	Prostate Adenocarcinoma	G43R	OncoKB: NA;CIViC: NA;MyCancerGenome: not present;CancerHotspot: no;3DHotspot: no	MutationAssessor: impact: high, score: 4.145;SIFT: impact: deleterious_low_confidence, score: 0;Polyphen-2: impact: probably_damaging, score: 1	Missense_Mutation			NA	NA	fhcrc	6	26285601	26285601	C	G				98			35
Prostate Adenocarcinoma (Fred Hutchinson CRC, Nat Med 2016)	06-081J1_LN	Prostate Adenocarcinoma	G43R	OncoKB: NA;CIViC: NA;MyCancerGenome: not present;CancerHotspot: no;3DHotspot: no	MutationAssessor: impact: high, score: 4.145;SIFT: impact: deleterious_low_confidence, score: 0;Polyphen-2: impact: probably_damaging, score: 1	Missense_Mutation			NA	NA	fhcrc	6	26285601	26285601	C	G				289			41
Prostate Adenocarcinoma (Fred Hutchinson CRC, Nat Med 2016)	06-081K2_LN	Prostate Adenocarcinoma	G43R	OncoKB: NA;CIViC: NA;MyCancerGenome: not present;CancerHotspot: no;3DHotspot: no	MutationAssessor: impact: high, score: 4.145;SIFT: impact: deleterious_low_confidence, score: 0;Polyphen-2: impact: probably_damaging, score: 1	Missense_Mutation			NA	NA	fhcrc	6	26285601	26285601	C	G				166			32
Prostate Adenocarcinoma (Fred Hutchinson CRC, Nat Med 2016)	05-011D2_LN	Prostate Adenocarcinoma	G43V	OncoKB: NA;CIViC: NA;MyCancerGenome: not present;CancerHotspot: no;3DHotspot: no	MutationAssessor: impact: high, score: 4.145;SIFT: impact: deleterious_low_confidence, score: 0;Polyphen-2: impact: probably_damaging, score: 1	Missense_Mutation			NA	NA	fhcrc	6	26285600	26285600	C	A				152			118
Prostate Adenocarcinoma (Fred Hutchinson CRC, Nat Med 2016)	05-011G4_LUNG	Prostate Adenocarcinoma	G43V	OncoKB: NA;CIViC: NA;MyCancerGenome: not present;CancerHotspot: no;3DHotspot: no	MutationAssessor: impact: high, score: 4.145;SIFT: impact: deleterious_low_confidence, score: 0;Polyphen-2: impact: probably_damaging, score: 1	Missense_Mutation			NA	NA	fhcrc	6	26285600	26285600	C	A				113			113
Pan-Lung Cancer (TCGA, Nat Genet 2016)	TCGA-77-A5G3-01	Lung Squamous Cell Carcinoma	I51M	OncoKB: NA;CIViC: NA;MyCancerGenome: not present;CancerHotspot: no;3DHotspot: no	MutationAssessor: impact: high, score: 3.735;SIFT: impact: deleterious, score: 0;Polyphen-2: impact: probably_damaging, score: 0.98	Missense_Mutation			Somatic	NA	broad.mit.edu	6	26285575	26285575	G	C			7	51		133	520
TCGA data for Esophagus-Stomach Cancers (TCGA, Nature 2017)	TCGA-LN-A9FR-01	Esophageal Squamous Cell Carcinoma	Y52C	OncoKB: NA;CIViC: NA;MyCancerGenome: not present;CancerHotspot: no;3DHotspot: no	MutationAssessor: impact: high, score: 3.975;SIFT: impact: deleterious, score: 0;Polyphen-2: impact: probably_damaging, score: 0.962	Missense_Mutation		1	Somatic	Untested	genome.wustl.edu	6	26285573	26285573	T	C			18	34		62	145
Breast Invasive Carcinoma (TCGA, Provisional)	TCGA-D8-A27V-01	Breast Invasive Lobular Carcinoma	Y52C	OncoKB: NA;CIViC: NA;MyCancerGenome: not present;CancerHotspot: no;3DHotspot: no	MutationAssessor: impact: high, score: 3.975;SIFT: impact: deleterious, score: 0;Polyphen-2: impact: probably_damaging, score: 0.962	Missense_Mutation		1	Somatic	Untested	genome.wustl.edu	6	26285573	26285573	T	C			52	65			156
Bladder Cancer (TCGA, Cell 2017)	TCGA-DK-A3IU-01	Bladder Urothelial Carcinoma	E64Q	OncoKB: NA;CIViC: NA;MyCancerGenome: not present;CancerHotspot: no;3DHotspot: no	MutationAssessor: impact: medium, score: 3.49;SIFT: impact: deleterious, score: 0;Polyphen-2: impact: possibly_damaging, score: 0.775	Missense_Mutation			Somatic	NaN	broad.mit.edu	6	26285538	26285538	C	G				89			374
Lymphoid Neoplasm Diffuse Large B-cell Lymphoma (TCGA, Provisional)	TCGA-FA-A7DS-01	Diffuse Large B-Cell Lymphoma	V66E	OncoKB: NA;CIViC: NA;MyCancerGenome: not present;CancerHotspot: no;3DHotspot: no	MutationAssessor: impact: high, score: 3.735;SIFT: impact: deleterious, score: 0;Polyphen-2: impact: possibly_damaging, score: 0.48	Missense_Mutation			Somatic	Untested	hgsc.bcm.edu	6	26285531	26285531	A	T			29	43		102	67
Bladder Urothelial Carcinoma (Dana Farber & MSKCC, Cancer Discov 2014)	DFCI-32_R	Bladder Urothelial Carcinoma	A70T	OncoKB: NA;CIViC: NA;MyCancerGenome: not present;CancerHotspot: no;3DHotspot: no	MutationAssessor: impact: low, score: 1.74;SIFT: impact: tolerated, score: 0.07;Polyphen-2: impact: possibly_damaging, score: 0.511	Missense_Mutation			NA	NA	NA	6	26285520	26285520	C	T							794
Genomic Hallmarks of Prostate Adenocarcinoma (CPC-GENE, Nature 2017)	CPCG0248-F1	Prostate Adenocarcinoma	A70V	OncoKB: NA;CIViC: NA;MyCancerGenome: not present;CancerHotspot: no;3DHotspot: no	MutationAssessor: impact: medium, score: 2.545;SIFT: impact: tolerated, score: 0.07;Polyphen-2: impact: benign, score: 0.43	Missense_Mutation			Somatic	Unknown	CPCGene	6	26285519	26285519	G	A							11
Head and Neck Squamous Cell Carcinoma (TCGA, Provisional)	TCGA-QK-A64Z-01	Head and Neck Squamous Cell Carcinoma	E75G	OncoKB: NA;CIViC: NA;MyCancerGenome: not present;CancerHotspot: no;3DHotspot: no	MutationAssessor: impact: high, score: 3.935;SIFT: impact: deleterious, score: 0;Polyphen-2: impact: probably_damaging, score: 0.977	Missense_Mutation			Somatic	NA	broad.mit.edu	6	26285504	26285504	T	C			18	66			74
Colorectal Adenocarcinoma (DFCI, Cell Reports 2016)	coadread_dfci_2016_302124	Colorectal Adenocarcinoma	T83S	OncoKB: NA;CIViC: NA;MyCancerGenome: not present;CancerHotspot: no;3DHotspot: no	MutationAssessor: impact: medium, score: 2.51;SIFT: impact: deleterious, score: 0.05;Polyphen-2: impact: benign, score: 0.213	Missense_Mutation			NA	NA	dfci.harvard.edu	6	26285481	26285481	T	A							683
Head and Neck Squamous Cell Carcinoma (Broad, Science 2011)	HN_62415	Head and Neck Squamous Cell Carcinoma	V88F	OncoKB: NA;CIViC: NA;MyCancerGenome: not present;CancerHotspot: no;3DHotspot: no	MutationAssessor: impact: high, score: 3.705;SIFT: impact: deleterious, score: 0.01;Polyphen-2: impact: probably_damaging, score: 0.971	Missense_Mutation		1	Unknown	Unknown	broad.mit.edu	6	26285466	26285466	C	A			23	132			166
Kidney Renal Clear Cell Carcinoma (TCGA, Provisional)	TCGA-BP-4352-01	Renal Clear Cell Carcinoma	R93Q	OncoKB: NA;CIViC: NA;MyCancerGenome: not present;CancerHotspot: no;3DHotspot: no	MutationAssessor: impact: high, score: 3.88;SIFT: impact: deleterious, score: 0;Polyphen-2: impact: probably_damaging, score: 0.976	Missense_Mutation		1	Somatic	Untested	hgsc.bcm.edu;ucsc.edu	6	26285450	26285450	C	T							82
Colorectal Adenocarcinoma (DFCI, Cell Reports 2016)	coadread_dfci_2016_55	Colorectal Adenocarcinoma	R96H	OncoKB: NA;CIViC: NA;MyCancerGenome: not present;CancerHotspot: no;3DHotspot: no	MutationAssessor: impact: medium, score: 2.15;SIFT: impact: tolerated, score: 0.07;Polyphen-2: impact: benign, score: 0.075	Missense_Mutation			NA	NA	dfci.harvard.edu	6	26285441	26285441	C	T							866
Liver Hepatocellular Carcinoma (AMC, Hepatology 2014)	H071904	Hepatocellular Adenoma	T97S	OncoKB: NA;CIViC: NA;MyCancerGenome: not present;CancerHotspot: no;3DHotspot: no	MutationAssessor: impact: medium, score: 3.06;SIFT: impact: deleterious, score: 0.03;Polyphen-2: impact: benign, score: 0.237	Missense_Mutation			Somatic	Unknown	LGGM	6	26285438	26285438	G	C				30			65
Gastric Adenocarcinoma (TMUCIH, PNAS 2015)	PGM28	Esophagogastric Adenocarcinoma	L98F	OncoKB: NA;CIViC: NA;MyCancerGenome: not present;CancerHotspot: no;3DHotspot: no	MutationAssessor: impact: medium, score: 3.39;SIFT: impact: deleterious, score: 0.01;Polyphen-2: impact: benign, score: 0.169	Missense_Mutation		1	NA	NA	NA	6	26285436	26285436	G	A							103
Lymphoid Neoplasm Diffuse Large B-cell Lymphoma (TCGA, Provisional)	TCGA-FA-A6HN-01	Diffuse Large B-Cell Lymphoma	G103D	OncoKB: NA;CIViC: NA;MyCancerGenome: not present;CancerHotspot: no;3DHotspot: no	MutationAssessor: impact: medium, score: 2.31;SIFT: impact: deleterious_low_confidence, score: 0;Polyphen-2: impact: possibly_damaging, score: 0.842	Missense_Mutation			Somatic	Untested	hgsc.bcm.edu	6	26285420	26285420	C	T			38	57		89	149
Uterine Corpus Endometrial Carcinoma (TCGA, PanCancer Atlas)	TCGA-B5-A1MX-01	Uterine Endometrioid Carcinoma	G14R	OncoKB: NA;CIViC: NA;MyCancerGenome: not present;CancerHotspot: no;3DHotspot: no	MutationAssessor: impact: medium, score: 2.495;SIFT: impact: deleterious_low_confidence, score: 0.02;Polyphen-2: impact: benign, score: 0	Missense_Mutation	diploid		.	.	.	6	26285688	26285688	C	T	0.33		10	20		19	5699	2019-01-02	ENST00000289352.1:c.40G>A
Ovarian Serous Cystadenocarcinoma (TCGA, PanCancer Atlas)	TCGA-09-2055-01	Serous Ovarian Cancer	A16G	OncoKB: NA;CIViC: NA;MyCancerGenome: not present;CancerHotspot: no;3DHotspot: no	MutationAssessor: impact: medium, score: 2.145;SIFT: impact: deleterious, score: 0;Polyphen-2: impact: unknown, score: 0	Missense_Mutation	gain	1	.	.	.	6	26285681	26285681	G	C	0.32		82	174		212	102	2019-01-02	ENST00000289352.1:c.47C>G
MSS Mixed Solid Tumors (Broad/Dana-Farber, Nat Genet 2018)	MEL-IPI_Pat123-Tumor-SM-5X2R1	Melanoma of Unknown Primary	I27T	OncoKB: NA;CIViC: NA;MyCancerGenome: not present;CancerHotspot: no;3DHotspot: no	MutationAssessor: impact: high, score: 3.505;SIFT: impact: deleterious, score: 0.04;Polyphen-2: impact: possibly_damaging, score: 0.844	Missense_Mutation			NA	NA	NA	6	26285648	26285648	A	G	0.04		15	325			529	2019-01-02	ENST00000289352.1:c.80T>C
Ovarian Serous Cystadenocarcinoma (TCGA, PanCancer Atlas)	TCGA-61-1722-01	Serous Ovarian Cancer	I27V	OncoKB: NA;CIViC: NA;MyCancerGenome: not present;CancerHotspot: no;3DHotspot: no	MutationAssessor: impact: medium, score: 2.535;SIFT: impact: deleterious, score: 0.05;Polyphen-2: impact: possibly_damaging, score: 0.765	Missense_Mutation	gain		.	.	.	6	26285649	26285649	T	C	0.04		9	194		119	95	2019-01-02	ENST00000289352.1:c.79A>G
Metastatic Prostate Adenocarcinoma (SU2C/PCF Dream Team, PNAS 2019)	PRAD-01115569-Tumor-SM-A56E6	Prostate Adenocarcinoma	T31S	OncoKB: NA;CIViC: NA;MyCancerGenome: not present;CancerHotspot: no;3DHotspot: no	MutationAssessor: impact: medium, score: 2.69;SIFT: impact: tolerated, score: 0.06;Polyphen-2: impact: benign, score: 0.382	Missense_Mutation	gain	1	Somatic	Untested	broad.mit.edu	6	26285636	26285636	G	C	0.51		142	138			105	2019-01-02	ENST00000289352.1:c.92C>G
Diffuse Large B cell Lymphoma (DFCI, Nat Med 2018)	DLBCL-LS3271	Activated B-cell Type	A34T	OncoKB: NA;CIViC: NA;MyCancerGenome: not present;CancerHotspot: no;3DHotspot: no	MutationAssessor: impact: medium, score: 2.415;SIFT: impact: tolerated, score: 0.06;Polyphen-2: impact: possibly_damaging, score: 0.575	Missense_Mutation			NA	NA	broad.mit.edu	6	26285628	26285628	C	T	0.05		5	86			156	2019-01-02	ENST00000289352.1:c.100G>A
Breast Invasive Carcinoma (TCGA, PanCancer Atlas)	TCGA-LL-A73Y-01	Breast Invasive Ductal Carcinoma	G42D	OncoKB: NA;CIViC: NA;MyCancerGenome: not present;CancerHotspot: no;3DHotspot: no	MutationAssessor: impact: medium, score: 3.28;SIFT: impact: deleterious_low_confidence, score: 0;Polyphen-2: impact: probably_damaging, score: 0.973	Missense_Mutation	gain		.	.	.	6	26285603	26285603	C	T	0.12		13	97		38	100	2019-01-02	ENST00000289352.1:c.125G>A
Lung Adenocarcinoma (TCGA, PanCancer Atlas)	TCGA-17-Z028-01	Lung Adenocarcinoma	I51F	OncoKB: NA;CIViC: NA;MyCancerGenome: not present;CancerHotspot: no;3DHotspot: no	MutationAssessor: impact: high, score: 3.735;SIFT: impact: deleterious, score: 0;Polyphen-2: impact: probably_damaging, score: 0.963	Missense_Mutation			.	.	.	6	26285577	26285577	T	A	0.53		45	40		125	446	2019-01-02	ENST00000289352.1:c.151A>T
Uterine Corpus Endometrial Carcinoma (TCGA, PanCancer Atlas)	TCGA-A5-A0G1-01	Uterine Serous Carcinoma/Uterine Papillary Serous Carcinoma	I51V	OncoKB: NA;CIViC: NA;MyCancerGenome: not present;CancerHotspot: no;3DHotspot: no	MutationAssessor: impact: low, score: 1.09;SIFT: impact: tolerated, score: 0.16;Polyphen-2: impact: benign, score: 0.054	Missense_Mutation	diploid		.	.	.	6	26285577	26285577	T	C	0.13		16	112		265	10823	2019-01-02	ENST00000289352.1:c.151A>G
MSS Mixed Solid Tumors (Broad/Dana-Farber, Nat Genet 2018)	CR9306_T	Cutaneous Melanoma	V61M	OncoKB: NA;CIViC: NA;MyCancerGenome: not present;CancerHotspot: no;3DHotspot: no	MutationAssessor: impact: medium, score: 2.77;SIFT: impact: deleterious, score: 0;Polyphen-2: impact: possibly_damaging, score: 0.671	Missense_Mutation			NA	NA	NA	6	26285547	26285547	C	T	0.58		128	94			1412	2019-01-02	ENST00000289352.1:c.181G>A
Uterine Corpus Endometrial Carcinoma (TCGA, PanCancer Atlas)	TCGA-B5-A3S1-01	Uterine Serous Carcinoma/Uterine Papillary Serous Carcinoma	E75Q	OncoKB: NA;CIViC: NA;MyCancerGenome: not present;CancerHotspot: no;3DHotspot: no	MutationAssessor: impact: medium, score: 3.24;SIFT: impact: deleterious, score: 0.03;Polyphen-2: impact: probably_damaging, score: 0.976	Missense_Mutation	gain		.	.	.	6	26285505	26285505	C	G	0.16		9	49		43	91	2019-01-02	ENST00000289352.1:c.223G>C
Ovarian Serous Cystadenocarcinoma (TCGA, PanCancer Atlas)	TCGA-24-2295-01	Serous Ovarian Cancer	A90T	OncoKB: NA;CIViC: NA;MyCancerGenome: not present;CancerHotspot: no;3DHotspot: no	MutationAssessor: impact: medium, score: 2.805;SIFT: impact: tolerated, score: 0.06;Polyphen-2: impact: benign, score: 0.228	Missense_Mutation	diploid		.	.	.	6	26285460	26285460	C	T	0.28		61	160		248	93	2019-01-02	ENST00000289352.1:c.268G>A

[truncated: 6 more sheets: HIST1H4I, HIST1H4J, HIST1H4K, HIST1H4L, HIST2H4A, HIST4H4]
